# Supplementary material for: Transcription factors, coregulators, and epigenetic marks are linearly correlated and highly redundant
Source: PLoS One. 2017 Dec 7;12(12):e0186324. doi: 10.1371/journal.pone.0186324 (PMC5720766; doi:10.1371/journal.pone.0186324)
Supplement: S1 Dataset — This file contains 27 sheets, where we do have information about the marks used, Pearson’s r and p-values for each situation evaluated, fitted linear models on 100% of the data, mark information content, and a list with download links. (XLSX) [file pone.0186324.s001.xlsx]

## Sheet: Supplementary  Tables Index
Table A	Overview over marks selected, their data and the cell lines, where we do have data for each respective mark
Table B	Pearson's r and p values (of t-test) between predicted and measured values after 10-fold cross validation for the different marks for the different cell lines (H1, H9, IMR90, K562, GM1287) for protein coding/lincRNA genes for the different positions (TSSs/Transcripts/TTSs) with 1%-quantile cutoff
Table C	Pearson's r and p values (of t-test) between predicted and measured values after 10-fold cross validation for the different marks for the different cell lines (H1, H9, IMR90, K562, GM1287) for protein coding/lincRNA genes for the different positions (TSSs/Transcripts/TTSs) with 5%-quantile cutoff (that cutoff is just for that particular table)
Table D	Pearson's r and p values (of t-test) between target mark and all other marks in that respective cell line for the different marks for the different cell lines (H1, H9, IMR90, K562, GM1287) for protein coding/lincRNA genes for the different positions (TSSs/Transcripts/TTSs)
Table E	Pearson's r and p values (of t-test) between target mark and the same mark in all other cell lines (if available) for the different marks for the different cell lines (H1, H9, IMR90, K562, GM1287) for protein coding/lincRNA genes for the different positions (TSSs/Transcripts/TTSs)
Table F	Linear models fitted on 100% data for the different marks for the different cell lines (H1, H9, IMR90, K562, GM1287) for protein coding/lincRNA genes for the different positions (TSSs/Transcripts/TTSs)
Table G	Pearson's r and p values (of t-test) between predicted and measured values for the different marks for the different cell lines (H1, H9, IMR90, K562, GM1287) for protein coding/lincRNA genes for the different positions (TSSs/Transcripts/TTSs) when model is fitted on 100% of data of another cell line
Table H	Pearson's r and p values (of t-test) between predicted and measured values after 10-fold cross validation for CAGE gene expression for the different cell lines (H1, IMR90, K562, GM1287) for protein coding/lincRNA genes for different models (linear models. MARS models) for different pseudocounts (1, 0.1, 0.01, 0.001) and different mark inputs (1 bin data, complete 40 bin data, middle 40 bin data)
Table I	MARS models fitted on 100% data for CAGE gene expression for the different cell lines (H1, IMR90, K562, GM1287) for protein coding/lincRNA genes on 40-bin resolution
Table J	Pearson's r and p values (of t-test) between predicted and measured values for CAGE gene expression for the different cell lines (H1, IMR90, K562, GM1287) for protein coding/lincRNA genes when models are fitted on 100% of data of another cell line
Table K	Pearson's r and p values (of t-test) between predicted and measured values after 10-fold cross validation for the different marks for the different cell lines (H1, H9, IMR90, K562, GM1287) for protein coding/lincRNA genes for the different positions (TSSs/Transcripts/TTSs) where the model is restricted to the IHEC histone modifications (H3K4ME1, H3K4ME3, H3K9ME3, H3K27AC, H3K27ME3, H3K36ME3)
Table L	Pearson's r and p values (of t-test) between predicted and measured values for the different marks for the different cell lines (H1, H9, IMR90, K562, GM1287) for protein coding/lincRNA genes for the different positions (TSSs/Transcripts/TTSs) where the model is fitted on the IHEC histone modifications (H3K4ME1, H3K4ME3, H3K9ME3, H3K27AC, H3K27ME3, H3K36ME3, 100% of data each) of another cell line
Table M	Linear models fitted on 100% data for the different marks for the different cell lines (H1, H9, IMR90, K562, GM1287) for protein coding/lincRNA genes for the different positions (TSSs/Transcripts/TTSs) where the input modifications are the IHEC histone modifications (H3K4ME1, H3K4ME3, H3K9ME3, H3K27AC, H3K27ME3, H3K36ME3)
Table N	Mark selection order for the different cell lines (H1, H9, IMR90, K562, GM12878)
Table O	Mark order according to Median Pearson's r after round one for the different cell lines (H1, H9, IMR90, K562, GM12878)
Table P	In K562: Median Pearson's r for each selection round for marks that can be selected, i.e., in round k we take the k-1 selected marks from the previous k-1 rounds and calculate for all not yet selected marks, we unify them with k-1 marks and calculate the median Peasons'r between predicted and measured values after 10-fold cross validation for all other marks where as input marks we take the previ…
Table Q	In K562: Pearson's r for each not yet selected mark in the respective round, i.e.. In round k we take all k selected marks (so including the one selected in this round) and calculate to each remaining mark the Pearson's r between predicted and measured values after 10-fold cross validation where as input we take the previously mentioned k marks
Table R	Supplementary Table 16 for GM12878
Table S	Supplementary Table 17 for GM12878
Table T	Supplementary Table 16 for H1
Table U	Supplementary Table 17 for H1
Table V	Supplementary Table 16 for IMR90
Table W	Supplementary Table 17 for IMR90
Table X	Supplementary Table 16 for H9
Table Y	Supplementary Table 17 for H9
Table Z	Data list download links

## Sheet: Table A
		Data for GM12878	Data for H1	Data for H9	Data for IMR90	Data for K562
ARID3A	Transcription factor					x
ATF1	Transcription factor					x
ATF2	Transcription factor	x	x
ATF3	Transcription factor	x	x			x
BACH1	Transcription factor		x			x
BATF	Transcription factor	x
BCL11A	Transcription factor	x	x
BCL3	Coregulator	x
BCLAF1	Transcription factor	x				x
BDP1	Transcription factor					x
BHLHE40	Transcription factor	x				x
BRCA1	Coregulator	x	x
BRF1	Transcription factor					x
BRF2	Transcription factor					x
CBX2	Chromatin remodeler					x
CBX3	Chromatin remodeler					x
CBX8	Chromatin remodeler					x
CCNT2	Unknown resp. not regulating function					x
CEBPB	Transcription factor	x	x		x	x
CEBPD	Transcription factor					x
CHD1	Chromatin remodeler	x	x			x
CHD2	Chromatin remodeler	x	x			x
CHD4	Chromatin remodeler					x
CHD7	Chromatin remodeler		x			x
COREST-RCOR1	Transcription factor	x			x	x
CREB1	Transcription factor	x	x			x
CREBBP	Coregulator					x
CTBP2	Coregulator		x
CTCF	Transcription factor	x	x		x	x
CTCFL	Transcription factor					x
CUX1	Transcription factor	x				x
DNA METHYLATION	DNA modification		x	x	x
DNASE HYPERSENSITIVITY	Chromatin openness indicator	x	x	x	x	x
E2F4	Transcription factor	x				x
E2F6	Transcription factor		x			x
EBF1	Transcription factor	x
EGFP-HDAC8	Chromatin remodeler					x
EGFP-JUNB	Transcription factor					x
EGFP-NR4A1	Transcription factor					x
EGR1	Transcription factor	x	x			x
ELF1	Transcription factor	x				x
ELK1	Transcription factor	x				x
ESRRA	Transcription factor	x
ETS1	Transcription factor	x				x
EZH2	Chromatin remodeler	x	x			x
FAM48A	Unknown resp. not regulating function	x
FOS (AND EGFP-FOS)	Transcription factor	x				x
FOSL1	Transcription factor		x			x
FOXM1	Transcription factor	x
GABP	Coregulator	x	x			x
GATA1	Transcription factor					x
GATA2 (AND EGFP-GATA2)	Transcription factor					x
GTF2B	Transcription factor					x
GTF2F1	Coregulator		x			x
GTF3C2	Transcription factor					x
H2AK5AC	Histone modification		x	x	x
H2AK9AC	Histone modification				x
H2AZ	Histone modification	x	x	x	x	x
H2BK120AC	Histone modification		x	x	x
H2BK12AC	Histone modification		x	x	x
H2BK15AC	Histone modification		x	x	x
H2BK20AC	Histone modification		x	x	x
H2BK5AC	Histone modification		x	x	x
H3K14AC	Histone modification		x	x	x
H3K18AC	Histone modification		x	x	x
H3K23AC	Histone modification		x	x	x
H3K23ME2	Histone modification		x	x
H3K27AC	Histone modification	x	x	x	x	x
H3K27ME3	Histone modification	x	x	x	x	x
H3K36ME3	Histone modification	x	x	x	x	x
H3K4AC	Histone modification		x	x	x
H3K4ME1	Histone modification	x	x	x	x	x
H3K4ME2	Histone modification	x	x	x	x	x
H3K4ME3	Histone modification	x	x	x	x	x
H3K56AC	Histone modification		x	x	x
H3K79ME1	Histone modification		x	x	x
H3K79ME2	Histone modification	x	x	x	x	x
H3K9AC	Histone modification	x	x	x	x	x
H3K9ME1	Histone modification				x	x
H3K9ME3	Histone modification	x	x	x	x	x
H3T11PH	Histone modification			x
H4K20ME1	Histone modification	x	x	x	x	x
H4K5AC	Histone modification		x	x	x
H4K8AC	Histone modification		x	x	x
H4K91AC	Histone modification		x	x	x
HCFC1	Coregulator					x
HDAC1	Chromatin remodeler					x
HDAC2	Chromatin remodeler		x			x
HDAC6	Chromatin remodeler		x			x
HMGN3	Unknown resp. not regulating function					x
IKZF1	Transcription factor	x
IRF1	Transcription factor					x
IRF3	Transcription factor	x
IRF4	Transcription factor	x
JARID1A	Transcription factor		x
JARID1B-PLU1	Transcription factor		x			x
JMJD2	Chromatin remodeler		x
JUN	Transcription factor		x			x
JUND (AND EGFP-JUND)	Transcription factor	x	x			x
KAP1	Coregulator					x
KAT2A-GCN5	Chromatin remodeler	x
KAT2B-PCAF	Chromatin remodeler					x
KDM1A-LSD1	Coregulator					x
MAFF	Transcription factor					x
MAFK	Transcription factor	x	x		x	x
MAX	Transcription factor	x	x			x
MAZ	Transcription factor	x			x	x
MEF2A	Transcription factor	x				x
MEF2C	Transcription factor	x
MTA3	Transcription factor	x
MXI1	Transcription factor	x	x		x	x
MYC	Transcription factor	x	x			x
NANOG	Transcription factor		x
NCOR1	Transcription factor					x
NFATC1	Transcription factor	x
NFE2	Transcription factor	x				x
NFIC	Transcription factor	x
NFYA	Transcription factor	x				x
NFYB	Transcription factor	x				x
NR2F2	Transcription factor					x
NRF1	Transcription factor	x	x			x
NRSF	Transcription factor		x
NRSF-REST	Transcription factor	x
P300	Coregulator	x	x			x
PAX5	Transcription factor	x
PBX3	Transcription factor	x
PHF8	Chromatin remodeler					x
PML	Coregulator	x				x
POL2	Unknown resp. not regulating function	x	x		x	x
POL3	Unknown resp. not regulating function	x				x
POU2F2	Transcription factor	x
POU5F1	Transcription factor		x
RAD21	Unknown resp. not regulating function	x	x		x	x
RBBP5	Coregulator		x			x
RDBP-NELF-E	Unknown resp. not regulating function					x
RELA	Transcription factor	x
REST	Transcription factor					x
RFX5	Transcription factor	x	x		x	x
RNF2	Coregulator					x
RPC155	Unknown resp. not regulating function					x
RUNX3	Transcription factor	x
RXRA	Transcription factor	x	x
SAP30	Coregulator		x			x
SETDB1	Transcription factor					x
SIN3A	Coregulator	x	x
SIN3AK20	Coregulator		x			x
SIRT6	Unknown resp. not regulating function		x			x
SIX5	Transcription factor	x	x			x
SMARCA4-BRG1	Chromatin remodeler					x
SMARCB1-INI1	Chromatin remodeler					x
SMC3	Unknown resp. not regulating function	x				x
SP1	Transcription factor	x	x			x
SP2	Transcription factor		x			x
SP4	Transcription factor		x
SPI1-PU1	Transcription factor	x				x
SREBP1	Transcription factor	x
SREBP2	Transcription factor	x
SRF	Transcription factor	x	x			x
STAT1	Transcription factor	x				x
STAT2	Transcription factor					x
STAT3	Transcription factor	x
STAT5A	Transcription factor	x				x
SUZ12	Unknown resp. not regulating function		x			x
TAF1	Coregulator	x	x			x
TAF7	Coregulator		x			x
TAL1	Transcription factor					x
TBL1XR1-TBLR1	Coregulator	x				x
TBP	Coregulator	x	x			x
TCF12	Transcription factor	x	x
TCF3	Transcription factor	x
TEAD4	Transcription factor		x			x
THAP1	Transcription factor					x
TR4-NR2C2	Transcription factor	x				x
TRIM28	Coregulator					x
UBTF	Transcription factor					x
USF1	Transcription factor	x	x			x
USF2	Transcription factor	x	x			x
WHIP	Unknown resp. not regulating function	x
WHSC1-NSD2	Transcription factor					x
XRCC4	Unknown resp. not regulating function					x
YY1	Transcription factor	x	x			x
ZBTB33	Transcription factor	x				x
ZBTB7A	Transcription factor					x
ZC3H11A	Unknown resp. not regulating function					x
ZEB1	Transcription factor	x
ZMIZ1	Transcription factor					x
ZNF143	Transcription factor	x	x			x
ZNF263	Transcription factor					x
ZNF274	Transcription factor	x	x			x
ZNF384	Transcription factor	x				x
ZZZ3	Transcription factor	x

## Sheet: Table B
	Pearson's r/TSS/protein_coding/K562	p values/TSS/protein_coding/K562	Pearson's r/Transcript/protein_coding/K562	p values/Transcript/protein_coding/K562	Pearson's r/TTS/protein_coding/K562	p values/TTS/protein_coding/K562	Pearson's r/TSS/lincRNA/K562	p values/TSS/lincRNA/K562	Pearson's r/Transcript/lincRNA/K562	p values/Transcript/lincRNA/K562	Pearson's r/TTS/lincRNA/K562	p values/TTS/lincRNA/K562	Pearson's r/TSS/protein_coding/GM12878	p values/TSS/protein_coding/GM12878	Pearson's r/Transcript/protein_coding/GM12878	p values/Transcript/protein_coding/GM12878	Pearson's r/TTS/protein_coding/GM12878	p values/TTS/protein_coding/GM12878	Pearson's r/TSS/lincRNA/GM12878	p values/TSS/lincRNA/GM12878	Pearson's r/Transcript/lincRNA/GM12878	p values/Transcript/lincRNA/GM12878	Pearson's r/TTS/lincRNA/GM12878	p values/TTS/lincRNA/GM12878	Pearson's r/TSS/protein_coding/H1	p values/TSS/protein_coding/H1	Pearson's r/Transcript/protein_coding/H1	p values/Transcript/protein_coding/H1	Pearson's r/TTS/protein_coding/H1	p values/TTS/protein_coding/H1	Pearson's r/TSS/lincRNA/H1	p values/TSS/lincRNA/H1	Pearson's r/Transcript/lincRNA/H1	p values/Transcript/lincRNA/H1	Pearson's r/TTS/lincRNA/H1	p values/TTS/lincRNA/H1	Pearson's r/TSS/protein_coding/IMR90	p values/TSS/protein_coding/IMR90	Pearson's r/Transcript/protein_coding/IMR90	p values/Transcript/protein_coding/IMR90	Pearson's r/TTS/protein_coding/IMR90	p values/TTS/protein_coding/IMR90	Pearson's r/TSS/lincRNA/IMR90	p values/TSS/lincRNA/IMR90	Pearson's r/Transcript/lincRNA/IMR90	p values/Transcript/lincRNA/IMR90	Pearson's r/TTS/lincRNA/IMR90	p values/TTS/lincRNA/IMR90	Pearson's r/TSS/protein_coding/H9
ARID3A	0.96	<2.2e-16	0.97	<2.2e-16	0.95	<2.2e-16	0.96	<2.2e-16	0.95	<2.2e-16	0.96	<2.2e-16	NA	NA	NA	NA	NA	NA	NA	NA	NA	NA	NA	NA	NA	NA	NA	NA	NA	NA	NA	NA	NA	NA	NA	NA	NA	NA	NA	NA	NA	NA	NA	NA	NA	NA	NA	NA	NA
ATF1	0.95	<2.2e-16	0.95	<2.2e-16	0.93	<2.2e-16	0.94	<2.2e-16	0.92	<2.2e-16	0.94	<2.2e-16	NA	NA	NA	NA	NA	NA	NA	NA	NA	NA	NA	NA	NA	NA	NA	NA	NA	NA	NA	NA	NA	NA	NA	NA	NA	NA	NA	NA	NA	NA	NA	NA	NA	NA	NA	NA	NA
ATF2	NA	NA	NA	NA	NA	NA	NA	NA	NA	NA	NA	NA	0.93	<2.2e-16	0.95	<2.2e-16	0.95	<2.2e-16	0.95	<2.2e-16	0.94	<2.2e-16	0.95	<2.2e-16	0.89	<2.2e-16	0.92	<2.2e-16	0.93	<2.2e-16	0.88	<2.2e-16	0.86	<2.2e-16	0.9	<2.2e-16	NA	NA	NA	NA	NA	NA	NA	NA	NA	NA	NA	NA	NA
ATF3	0.88	<2.2e-16	0.88	<2.2e-16	0.88	<2.2e-16	0.9	<2.2e-16	0.86	<2.2e-16	0.89	<2.2e-16	0.83	<2.2e-16	0.76	<2.2e-16	0.65	<2.2e-16	0.73	<2.2e-16	0.58	<2.2e-16	0.63	<2.2e-16	0.81	<2.2e-16	0.77	<2.2e-16	0.65	<2.2e-16	0.68	<2.2e-16	0.49	<2.2e-16	0.53	<2.2e-16	NA	NA	NA	NA	NA	NA	NA	NA	NA	NA	NA	NA	NA
BACH1	0.95	<2.2e-16	0.96	<2.2e-16	0.94	<2.2e-16	0.95	<2.2e-16	0.93	<2.2e-16	0.94	<2.2e-16	NA	NA	NA	NA	NA	NA	NA	NA	NA	NA	NA	NA	0.88	<2.2e-16	0.92	<2.2e-16	0.9	<2.2e-16	0.91	<2.2e-16	0.89	<2.2e-16	0.9	<2.2e-16	NA	NA	NA	NA	NA	NA	NA	NA	NA	NA	NA	NA	NA
BATF	NA	NA	NA	NA	NA	NA	NA	NA	NA	NA	NA	NA	0.71	<2.2e-16	0.78	<2.2e-16	0.77	<2.2e-16	0.84	<2.2e-16	0.82	<2.2e-16	0.84	<2.2e-16	NA	NA	NA	NA	NA	NA	NA	NA	NA	NA	NA	NA	NA	NA	NA	NA	NA	NA	NA	NA	NA	NA	NA	NA	NA
BCL11A	NA	NA	NA	NA	NA	NA	NA	NA	NA	NA	NA	NA	0.91	<2.2e-16	0.92	<2.2e-16	0.92	<2.2e-16	0.94	<2.2e-16	0.91	<2.2e-16	0.94	<2.2e-16	0.53	<2.2e-16	0.55	<2.2e-16	0.55	<2.2e-16	0.53	<2.2e-16	0.49	<2.2e-16	0.48	<2.2e-16	NA	NA	NA	NA	NA	NA	NA	NA	NA	NA	NA	NA	NA
BCL3	NA	NA	NA	NA	NA	NA	NA	NA	NA	NA	NA	NA	0.77	<2.2e-16	0.79	<2.2e-16	0.81	<2.2e-16	0.77	<2.2e-16	0.7	<2.2e-16	0.75	<2.2e-16	NA	NA	NA	NA	NA	NA	NA	NA	NA	NA	NA	NA	NA	NA	NA	NA	NA	NA	NA	NA	NA	NA	NA	NA	NA
BCLAF1	0.87	<2.2e-16	0.88	<2.2e-16	0.85	<2.2e-16	0.87	<2.2e-16	0.8	<2.2e-16	0.83	<2.2e-16	0.94	<2.2e-16	0.95	<2.2e-16	0.96	<2.2e-16	0.96	<2.2e-16	0.94	<2.2e-16	0.96	<2.2e-16	NA	NA	NA	NA	NA	NA	NA	NA	NA	NA	NA	NA	NA	NA	NA	NA	NA	NA	NA	NA	NA	NA	NA	NA	NA
BDP1	0.95	<2.2e-16	0.95	<2.2e-16	0.92	<2.2e-16	0.94	<2.2e-16	0.9	<2.2e-16	0.93	<2.2e-16	NA	NA	NA	NA	NA	NA	NA	NA	NA	NA	NA	NA	NA	NA	NA	NA	NA	NA	NA	NA	NA	NA	NA	NA	NA	NA	NA	NA	NA	NA	NA	NA	NA	NA	NA	NA	NA
BHLHE40	0.85	<2.2e-16	0.92	<2.2e-16	0.92	<2.2e-16	0.92	<2.2e-16	0.93	<2.2e-16	0.93	<2.2e-16	0.84	<2.2e-16	0.91	<2.2e-16	0.92	<2.2e-16	0.92	<2.2e-16	0.93	<2.2e-16	0.93	<2.2e-16	NA	NA	NA	NA	NA	NA	NA	NA	NA	NA	NA	NA	NA	NA	NA	NA	NA	NA	NA	NA	NA	NA	NA	NA	NA
BRCA1	NA	NA	NA	NA	NA	NA	NA	NA	NA	NA	NA	NA	0.97	<2.2e-16	0.96	<2.2e-16	0.93	<2.2e-16	0.95	<2.2e-16	0.92	<2.2e-16	0.93	<2.2e-16	0.95	<2.2e-16	0.95	<2.2e-16	0.93	<2.2e-16	0.95	<2.2e-16	0.92	<2.2e-16	0.93	<2.2e-16	NA	NA	NA	NA	NA	NA	NA	NA	NA	NA	NA	NA	NA
BRF1	0.9	<2.2e-16	0.91	<2.2e-16	0.86	<2.2e-16	0.88	<2.2e-16	0.82	<2.2e-16	0.87	<2.2e-16	NA	NA	NA	NA	NA	NA	NA	NA	NA	NA	NA	NA	NA	NA	NA	NA	NA	NA	NA	NA	NA	NA	NA	NA	NA	NA	NA	NA	NA	NA	NA	NA	NA	NA	NA	NA	NA
BRF2	0.96	<2.2e-16	0.95	<2.2e-16	0.93	<2.2e-16	0.94	<2.2e-16	0.91	<2.2e-16	0.94	<2.2e-16	NA	NA	NA	NA	NA	NA	NA	NA	NA	NA	NA	NA	NA	NA	NA	NA	NA	NA	NA	NA	NA	NA	NA	NA	NA	NA	NA	NA	NA	NA	NA	NA	NA	NA	NA	NA	NA
CBX2	0.95	<2.2e-16	0.94	<2.2e-16	0.93	<2.2e-16	0.95	<2.2e-16	0.92	<2.2e-16	0.95	<2.2e-16	NA	NA	NA	NA	NA	NA	NA	NA	NA	NA	NA	NA	NA	NA	NA	NA	NA	NA	NA	NA	NA	NA	NA	NA	NA	NA	NA	NA	NA	NA	NA	NA	NA	NA	NA	NA	NA
CBX3	0.96	<2.2e-16	0.95	<2.2e-16	0.95	<2.2e-16	0.95	<2.2e-16	0.94	<2.2e-16	0.95	<2.2e-16	NA	NA	NA	NA	NA	NA	NA	NA	NA	NA	NA	NA	NA	NA	NA	NA	NA	NA	NA	NA	NA	NA	NA	NA	NA	NA	NA	NA	NA	NA	NA	NA	NA	NA	NA	NA	NA
CBX8	0.94	<2.2e-16	0.94	<2.2e-16	0.92	<2.2e-16	0.95	<2.2e-16	0.91	<2.2e-16	0.95	<2.2e-16	NA	NA	NA	NA	NA	NA	NA	NA	NA	NA	NA	NA	NA	NA	NA	NA	NA	NA	NA	NA	NA	NA	NA	NA	NA	NA	NA	NA	NA	NA	NA	NA	NA	NA	NA	NA	NA
CCNT2	0.97	<2.2e-16	0.97	<2.2e-16	0.97	<2.2e-16	0.97	<2.2e-16	0.95	<2.2e-16	0.96	<2.2e-16	NA	NA	NA	NA	NA	NA	NA	NA	NA	NA	NA	NA	NA	NA	NA	NA	NA	NA	NA	NA	NA	NA	NA	NA	NA	NA	NA	NA	NA	NA	NA	NA	NA	NA	NA	NA	NA
CEBPB	0.82	<2.2e-16	0.83	<2.2e-16	0.82	<2.2e-16	0.85	<2.2e-16	0.81	<2.2e-16	0.85	<2.2e-16	0.97	<2.2e-16	0.96	<2.2e-16	0.95	<2.2e-16	0.96	<2.2e-16	0.94	<2.2e-16	0.95	<2.2e-16	0.76	<2.2e-16	0.88	<2.2e-16	0.84	<2.2e-16	0.87	<2.2e-16	0.85	<2.2e-16	0.86	<2.2e-16	0.61	<2.2e-16	0.75	<2.2e-16	0.7	<2.2e-16	0.73	<2.2e-16	0.77	<2.2e-16	0.74	<2.2e-16	NA
CEBPD	0.98	<2.2e-16	0.98	<2.2e-16	0.97	<2.2e-16	0.97	<2.2e-16	0.96	<2.2e-16	0.97	<2.2e-16	NA	NA	NA	NA	NA	NA	NA	NA	NA	NA	NA	NA	NA	NA	NA	NA	NA	NA	NA	NA	NA	NA	NA	NA	NA	NA	NA	NA	NA	NA	NA	NA	NA	NA	NA	NA	NA
CHD1	0.97	<2.2e-16	0.97	<2.2e-16	0.96	<2.2e-16	0.97	<2.2e-16	0.94	<2.2e-16	0.95	<2.2e-16	0.96	<2.2e-16	0.96	<2.2e-16	0.96	<2.2e-16	0.97	<2.2e-16	0.96	<2.2e-16	0.96	<2.2e-16	0.93	<2.2e-16	0.94	<2.2e-16	0.92	<2.2e-16	0.94	<2.2e-16	0.91	<2.2e-16	0.93	<2.2e-16	NA	NA	NA	NA	NA	NA	NA	NA	NA	NA	NA	NA	NA
CHD2	0.91	<2.2e-16	0.87	<2.2e-16	0.94	<2.2e-16	0.91	<2.2e-16	0.92	<2.2e-16	0.94	<2.2e-16	0.96	<2.2e-16	0.96	<2.2e-16	0.96	<2.2e-16	0.97	<2.2e-16	0.95	<2.2e-16	0.96	<2.2e-16	0.94	<2.2e-16	0.94	<2.2e-16	0.95	<2.2e-16	0.95	<2.2e-16	0.94	<2.2e-16	0.95	<2.2e-16	NA	NA	NA	NA	NA	NA	NA	NA	NA	NA	NA	NA	NA
CHD4	0.88	<2.2e-16	0.87	<2.2e-16	0.83	<2.2e-16	0.89	<2.2e-16	0.82	<2.2e-16	0.87	<2.2e-16	NA	NA	NA	NA	NA	NA	NA	NA	NA	NA	NA	NA	NA	NA	NA	NA	NA	NA	NA	NA	NA	NA	NA	NA	NA	NA	NA	NA	NA	NA	NA	NA	NA	NA	NA	NA	NA
CHD7	0.92	<2.2e-16	0.95	<2.2e-16	0.94	<2.2e-16	0.93	<2.2e-16	0.9	<2.2e-16	0.92	<2.2e-16	NA	NA	NA	NA	NA	NA	NA	NA	NA	NA	NA	NA	0.9	<2.2e-16	0.93	<2.2e-16	0.9	<2.2e-16	0.91	<2.2e-16	0.88	<2.2e-16	0.89	<2.2e-16	NA	NA	NA	NA	NA	NA	NA	NA	NA	NA	NA	NA	NA
COREST-RCOR1	0.98	<2.2e-16	0.98	<2.2e-16	0.97	<2.2e-16	0.98	<2.2e-16	0.96	<2.2e-16	0.97	<2.2e-16	0.98	<2.2e-16	0.97	<2.2e-16	0.97	<2.2e-16	0.98	<2.2e-16	0.96	<2.2e-16	0.97	<2.2e-16	NA	NA	NA	NA	NA	NA	NA	NA	NA	NA	NA	NA	0.93	<2.2e-16	0.95	<2.2e-16	0.93	<2.2e-16	0.95	<2.2e-16	0.94	<2.2e-16	0.95	<2.2e-16	NA
CREB1	0.94	<2.2e-16	0.94	<2.2e-16	0.94	<2.2e-16	0.94	<2.2e-16	0.92	<2.2e-16	0.94	<2.2e-16	0.85	<2.2e-16	0.93	<2.2e-16	0.95	<2.2e-16	0.94	<2.2e-16	0.95	<2.2e-16	0.95	<2.2e-16	0.8	<2.2e-16	0.87	<2.2e-16	0.91	<2.2e-16	0.89	<2.2e-16	0.91	<2.2e-16	0.92	<2.2e-16	NA	NA	NA	NA	NA	NA	NA	NA	NA	NA	NA	NA	NA
CREBBP	0.81	<2.2e-16	0.85	<2.2e-16	0.8	<2.2e-16	0.79	<2.2e-16	0.75	<2.2e-16	0.78	<2.2e-16	NA	NA	NA	NA	NA	NA	NA	NA	NA	NA	NA	NA	NA	NA	NA	NA	NA	NA	NA	NA	NA	NA	NA	NA	NA	NA	NA	NA	NA	NA	NA	NA	NA	NA	NA	NA	NA
CTBP2	NA	NA	NA	NA	NA	NA	NA	NA	NA	NA	NA	NA	NA	NA	NA	NA	NA	NA	NA	NA	NA	NA	NA	NA	0.94	<2.2e-16	0.96	<2.2e-16	0.95	<2.2e-16	0.95	<2.2e-16	0.92	<2.2e-16	0.94	<2.2e-16	NA	NA	NA	NA	NA	NA	NA	NA	NA	NA	NA	NA	NA
CTCF	0.89	<2.2e-16	0.89	<2.2e-16	0.92	<2.2e-16	0.91	<2.2e-16	0.87	<2.2e-16	0.9	<2.2e-16	0.86	<2.2e-16	0.89	<2.2e-16	0.94	<2.2e-16	0.93	<2.2e-16	0.91	<2.2e-16	0.93	<2.2e-16	0.79	<2.2e-16	0.85	<2.2e-16	0.89	<2.2e-16	0.86	<2.2e-16	0.86	<2.2e-16	0.87	<2.2e-16	0.81	<2.2e-16	0.87	<2.2e-16	0.92	<2.2e-16	0.91	<2.2e-16	0.9	<2.2e-16	0.92	<2.2e-16	NA
CTCFL	0.79	<2.2e-16	0.83	<2.2e-16	0.81	<2.2e-16	0.8	<2.2e-16	0.68	<2.2e-16	0.76	<2.2e-16	NA	NA	NA	NA	NA	NA	NA	NA	NA	NA	NA	NA	NA	NA	NA	NA	NA	NA	NA	NA	NA	NA	NA	NA	NA	NA	NA	NA	NA	NA	NA	NA	NA	NA	NA	NA	NA
CUX1	0.96	<2.2e-16	0.97	<2.2e-16	0.96	<2.2e-16	0.97	<2.2e-16	0.96	<2.2e-16	0.97	<2.2e-16	0.95	<2.2e-16	0.96	<2.2e-16	0.94	<2.2e-16	0.96	<2.2e-16	0.93	<2.2e-16	0.95	<2.2e-16	NA	NA	NA	NA	NA	NA	NA	NA	NA	NA	NA	NA	NA	NA	NA	NA	NA	NA	NA	NA	NA	NA	NA	NA	NA
DNA METHYLATION	NA	NA	NA	NA	NA	NA	NA	NA	NA	NA	NA	NA	NA	NA	NA	NA	NA	NA	NA	NA	NA	NA	NA	NA	0.91	<2.2e-16	0.87	<2.2e-16	0.89	<2.2e-16	0.9	<2.2e-16	0.83	<2.2e-16	0.88	<2.2e-16	0.78	<2.2e-16	0.79	<2.2e-16	0.8	<2.2e-16	0.78	<2.2e-16	0.72	<2.2e-16	0.76	<2.2e-16	0.88
DNASE HYPERSENSITIVITY	0.94	<2.2e-16	0.95	<2.2e-16	0.95	<2.2e-16	0.96	<2.2e-16	0.94	<2.2e-16	0.96	<2.2e-16	0.95	<2.2e-16	0.96	<2.2e-16	0.96	<2.2e-16	0.96	<2.2e-16	0.95	<2.2e-16	0.96	<2.2e-16	0.92	<2.2e-16	0.96	<2.2e-16	0.96	<2.2e-16	0.96	<2.2e-16	0.95	<2.2e-16	0.96	<2.2e-16	0.85	<2.2e-16	0.89	<2.2e-16	0.89	<2.2e-16	0.9	<2.2e-16	0.9	<2.2e-16	0.9	<2.2e-16	0.88
E2F4	0.89	<2.2e-16	0.95	<2.2e-16	0.96	<2.2e-16	0.96	<2.2e-16	0.94	<2.2e-16	0.96	<2.2e-16	0.83	<2.2e-16	0.91	<2.2e-16	0.91	<2.2e-16	0.93	<2.2e-16	0.89	<2.2e-16	0.91	<2.2e-16	NA	NA	NA	NA	NA	NA	NA	NA	NA	NA	NA	NA	NA	NA	NA	NA	NA	NA	NA	NA	NA	NA	NA	NA	NA
E2F6	0.9	<2.2e-16	0.92	<2.2e-16	0.93	<2.2e-16	0.93	<2.2e-16	0.92	<2.2e-16	0.94	<2.2e-16	NA	NA	NA	NA	NA	NA	NA	NA	NA	NA	NA	NA	0.92	<2.2e-16	0.95	<2.2e-16	0.95	<2.2e-16	0.95	<2.2e-16	0.94	<2.2e-16	0.95	<2.2e-16	NA	NA	NA	NA	NA	NA	NA	NA	NA	NA	NA	NA	NA
EBF1	NA	NA	NA	NA	NA	NA	NA	NA	NA	NA	NA	NA	0.67	<2.2e-16	0.78	<2.2e-16	0.78	<2.2e-16	0.8	<2.2e-16	0.79	<2.2e-16	0.82	<2.2e-16	NA	NA	NA	NA	NA	NA	NA	NA	NA	NA	NA	NA	NA	NA	NA	NA	NA	NA	NA	NA	NA	NA	NA	NA	NA
EGFP-HDAC8	0.91	<2.2e-16	0.94	<2.2e-16	0.9	<2.2e-16	0.89	<2.2e-16	0.85	<2.2e-16	0.86	<2.2e-16	NA	NA	NA	NA	NA	NA	NA	NA	NA	NA	NA	NA	NA	NA	NA	NA	NA	NA	NA	NA	NA	NA	NA	NA	NA	NA	NA	NA	NA	NA	NA	NA	NA	NA	NA	NA	NA
EGFP-JUNB	0.92	<2.2e-16	0.92	<2.2e-16	0.9	<2.2e-16	0.91	<2.2e-16	0.87	<2.2e-16	0.89	<2.2e-16	NA	NA	NA	NA	NA	NA	NA	NA	NA	NA	NA	NA	NA	NA	NA	NA	NA	NA	NA	NA	NA	NA	NA	NA	NA	NA	NA	NA	NA	NA	NA	NA	NA	NA	NA	NA	NA
EGFP-NR4A1	0.77	<2.2e-16	0.89	<2.2e-16	0.86	<2.2e-16	0.8	<2.2e-16	0.75	<2.2e-16	0.79	<2.2e-16	NA	NA	NA	NA	NA	NA	NA	NA	NA	NA	NA	NA	NA	NA	NA	NA	NA	NA	NA	NA	NA	NA	NA	NA	NA	NA	NA	NA	NA	NA	NA	NA	NA	NA	NA	NA	NA
EGR1	0.74	<2.2e-16	0.81	<2.2e-16	0.8	<2.2e-16	0.8	<2.2e-16	0.77	<2.2e-16	0.79	<2.2e-16	0.76	<2.2e-16	0.85	<2.2e-16	0.85	<2.2e-16	0.84	<2.2e-16	0.8	<2.2e-16	0.85	<2.2e-16	0.57	<2.2e-16	0.62	<2.2e-16	0.65	<2.2e-16	0.66	<2.2e-16	0.57	<2.2e-16	0.67	<2.2e-16	NA	NA	NA	NA	NA	NA	NA	NA	NA	NA	NA	NA	NA
ELF1	0.78	<2.2e-16	0.84	<2.2e-16	0.85	<2.2e-16	0.84	<2.2e-16	0.83	<2.2e-16	0.86	<2.2e-16	0.86	<2.2e-16	0.92	<2.2e-16	0.93	<2.2e-16	0.93	<2.2e-16	0.92	<2.2e-16	0.94	<2.2e-16	NA	NA	NA	NA	NA	NA	NA	NA	NA	NA	NA	NA	NA	NA	NA	NA	NA	NA	NA	NA	NA	NA	NA	NA	NA
ELK1	0.96	<2.2e-16	0.97	<2.2e-16	0.96	<2.2e-16	0.96	<2.2e-16	0.94	<2.2e-16	0.96	<2.2e-16	0.94	<2.2e-16	0.96	<2.2e-16	0.95	<2.2e-16	0.96	<2.2e-16	0.94	<2.2e-16	0.95	<2.2e-16	NA	NA	NA	NA	NA	NA	NA	NA	NA	NA	NA	NA	NA	NA	NA	NA	NA	NA	NA	NA	NA	NA	NA	NA	NA
ESRRA	NA	NA	NA	NA	NA	NA	NA	NA	NA	NA	NA	NA	0.96	<2.2e-16	0.96	<2.2e-16	0.95	<2.2e-16	0.96	<2.2e-16	0.94	<2.2e-16	0.95	<2.2e-16	NA	NA	NA	NA	NA	NA	NA	NA	NA	NA	NA	NA	NA	NA	NA	NA	NA	NA	NA	NA	NA	NA	NA	NA	NA
ETS1	0.96	<2.2e-16	0.96	<2.2e-16	0.95	<2.2e-16	0.95	<2.2e-16	0.91	<2.2e-16	0.94	<2.2e-16	0.95	<2.2e-16	0.93	<2.2e-16	0.91	<2.2e-16	0.92	<2.2e-16	0.86	<2.2e-16	0.91	<2.2e-16	NA	NA	NA	NA	NA	NA	NA	NA	NA	NA	NA	NA	NA	NA	NA	NA	NA	NA	NA	NA	NA	NA	NA	NA	NA
EZH2	0.94	<2.2e-16	0.95	<2.2e-16	0.94	<2.2e-16	0.95	<2.2e-16	0.93	<2.2e-16	0.95	<2.2e-16	0.87	<2.2e-16	0.87	<2.2e-16	0.86	<2.2e-16	0.87	<2.2e-16	0.84	<2.2e-16	0.86	<2.2e-16	0.98	<2.2e-16	0.98	<2.2e-16	0.98	<2.2e-16	0.97	<2.2e-16	0.96	<2.2e-16	0.97	<2.2e-16	NA	NA	NA	NA	NA	NA	NA	NA	NA	NA	NA	NA	NA
FAM48A	NA	NA	NA	NA	NA	NA	NA	NA	NA	NA	NA	NA	0.85	<2.2e-16	0.91	<2.2e-16	0.85	<2.2e-16	0.87	<2.2e-16	0.83	<2.2e-16	0.87	<2.2e-16	NA	NA	NA	NA	NA	NA	NA	NA	NA	NA	NA	NA	NA	NA	NA	NA	NA	NA	NA	NA	NA	NA	NA	NA	NA
FOS (AND EGFP-FOS)	0.95	<2.2e-16	0.93	<2.2e-16	0.92	<2.2e-16	0.94	<2.2e-16	0.9	<2.2e-16	0.93	<2.2e-16	0.93	<2.2e-16	0.89	<2.2e-16	0.84	<2.2e-16	0.88	<2.2e-16	0.79	<2.2e-16	0.84	<2.2e-16	NA	NA	NA	NA	NA	NA	NA	NA	NA	NA	NA	NA	NA	NA	NA	NA	NA	NA	NA	NA	NA	NA	NA	NA	NA
FOSL1	0.8	<2.2e-16	0.83	<2.2e-16	0.82	<2.2e-16	0.84	<2.2e-16	0.74	<2.2e-16	0.83	<2.2e-16	NA	NA	NA	NA	NA	NA	NA	NA	NA	NA	NA	NA	0.34	<2.2e-16	0.37	<2.2e-16	0.28	<2.2e-16	0.28	<2.2e-16	0.21	<2.2e-16	0.26	<2.2e-16	NA	NA	NA	NA	NA	NA	NA	NA	NA	NA	NA	NA	NA
FOXM1	NA	NA	NA	NA	NA	NA	NA	NA	NA	NA	NA	NA	0.96	<2.2e-16	0.97	<2.2e-16	0.97	<2.2e-16	0.97	<2.2e-16	0.96	<2.2e-16	0.97	<2.2e-16	NA	NA	NA	NA	NA	NA	NA	NA	NA	NA	NA	NA	NA	NA	NA	NA	NA	NA	NA	NA	NA	NA	NA	NA	NA
GABP	0.78	<2.2e-16	0.76	<2.2e-16	0.8	<2.2e-16	0.75	<2.2e-16	0.7	<2.2e-16	0.77	<2.2e-16	0.79	<2.2e-16	0.77	<2.2e-16	0.81	<2.2e-16	0.83	<2.2e-16	0.85	<2.2e-16	0.88	<2.2e-16	0.66	<2.2e-16	0.75	<2.2e-16	0.79	<2.2e-16	0.74	<2.2e-16	0.75	<2.2e-16	0.8	<2.2e-16	NA	NA	NA	NA	NA	NA	NA	NA	NA	NA	NA	NA	NA
GATA1	0.97	<2.2e-16	0.97	<2.2e-16	0.95	<2.2e-16	0.96	<2.2e-16	0.94	<2.2e-16	0.96	<2.2e-16	NA	NA	NA	NA	NA	NA	NA	NA	NA	NA	NA	NA	NA	NA	NA	NA	NA	NA	NA	NA	NA	NA	NA	NA	NA	NA	NA	NA	NA	NA	NA	NA	NA	NA	NA	NA	NA
GATA2 (AND EGFP-GATA2)	0.9	<2.2e-16	0.9	<2.2e-16	0.89	<2.2e-16	0.91	<2.2e-16	0.86	<2.2e-16	0.91	<2.2e-16	NA	NA	NA	NA	NA	NA	NA	NA	NA	NA	NA	NA	NA	NA	NA	NA	NA	NA	NA	NA	NA	NA	NA	NA	NA	NA	NA	NA	NA	NA	NA	NA	NA	NA	NA	NA	NA
GTF2B	0.95	<2.2e-16	0.95	<2.2e-16	0.92	<2.2e-16	0.94	<2.2e-16	0.9	<2.2e-16	0.92	<2.2e-16	NA	NA	NA	NA	NA	NA	NA	NA	NA	NA	NA	NA	NA	NA	NA	NA	NA	NA	NA	NA	NA	NA	NA	NA	NA	NA	NA	NA	NA	NA	NA	NA	NA	NA	NA	NA	NA
GTF2F1	0.98	<2.2e-16	0.98	<2.2e-16	0.96	<2.2e-16	0.97	<2.2e-16	0.95	<2.2e-16	0.96	<2.2e-16	NA	NA	NA	NA	NA	NA	NA	NA	NA	NA	NA	NA	0.96	<2.2e-16	0.96	<2.2e-16	0.93	<2.2e-16	0.95	<2.2e-16	0.92	<2.2e-16	0.94	<2.2e-16	NA	NA	NA	NA	NA	NA	NA	NA	NA	NA	NA	NA	NA
GTF3C2	0.8	<2.2e-16	0.88	<2.2e-16	0.87	<2.2e-16	0.88	<2.2e-16	0.86	<2.2e-16	0.88	<2.2e-16	NA	NA	NA	NA	NA	NA	NA	NA	NA	NA	NA	NA	NA	NA	NA	NA	NA	NA	NA	NA	NA	NA	NA	NA	NA	NA	NA	NA	NA	NA	NA	NA	NA	NA	NA	NA	NA
H2AK5AC	NA	NA	NA	NA	NA	NA	NA	NA	NA	NA	NA	NA	NA	NA	NA	NA	NA	NA	NA	NA	NA	NA	NA	NA	0.93	<2.2e-16	0.96	<2.2e-16	0.95	<2.2e-16	0.95	<2.2e-16	0.93	<2.2e-16	0.95	<2.2e-16	0.98	<2.2e-16	0.98	<2.2e-16	0.98	<2.2e-16	0.99	<2.2e-16	0.98	<2.2e-16	0.99	<2.2e-16	0.91
H2AK9AC	NA	NA	NA	NA	NA	NA	NA	NA	NA	NA	NA	NA	NA	NA	NA	NA	NA	NA	NA	NA	NA	NA	NA	NA	NA	NA	NA	NA	NA	NA	NA	NA	NA	NA	NA	NA	0.94	<2.2e-16	0.95	<2.2e-16	0.92	<2.2e-16	0.93	<2.2e-16	0.91	<2.2e-16	0.93	<2.2e-16	NA
H2AZ	0.94	<2.2e-16	0.91	<2.2e-16	0.91	<2.2e-16	0.95	<2.2e-16	0.92	<2.2e-16	0.93	<2.2e-16	0.94	<2.2e-16	0.91	<2.2e-16	0.92	<2.2e-16	0.94	<2.2e-16	0.92	<2.2e-16	0.92	<2.2e-16	0.87	<2.2e-16	0.87	<2.2e-16	0.85	<2.2e-16	0.87	<2.2e-16	0.83	<2.2e-16	0.84	<2.2e-16	0.95	<2.2e-16	0.94	<2.2e-16	0.95	<2.2e-16	0.96	<2.2e-16	0.95	<2.2e-16	0.96	<2.2e-16	0.85
H2BK120AC	NA	NA	NA	NA	NA	NA	NA	NA	NA	NA	NA	NA	NA	NA	NA	NA	NA	NA	NA	NA	NA	NA	NA	NA	0.95	<2.2e-16	0.96	<2.2e-16	0.95	<2.2e-16	0.96	<2.2e-16	0.94	<2.2e-16	0.96	<2.2e-16	0.99	<2.2e-16	0.99	<2.2e-16	0.99	<2.2e-16	0.99	<2.2e-16	0.99	<2.2e-16	0.99	<2.2e-16	0.94
H2BK12AC	NA	NA	NA	NA	NA	NA	NA	NA	NA	NA	NA	NA	NA	NA	NA	NA	NA	NA	NA	NA	NA	NA	NA	NA	0.96	<2.2e-16	0.97	<2.2e-16	0.97	<2.2e-16	0.97	<2.2e-16	0.96	<2.2e-16	0.97	<2.2e-16	0.99	<2.2e-16	0.99	<2.2e-16	0.99	<2.2e-16	0.99	<2.2e-16	0.99	<2.2e-16	0.99	<2.2e-16	0.94
H2BK15AC	NA	NA	NA	NA	NA	NA	NA	NA	NA	NA	NA	NA	NA	NA	NA	NA	NA	NA	NA	NA	NA	NA	NA	NA	0.94	<2.2e-16	0.97	<2.2e-16	0.96	<2.2e-16	0.96	<2.2e-16	0.94	<2.2e-16	0.96	<2.2e-16	0.99	<2.2e-16	0.99	<2.2e-16	0.99	<2.2e-16	0.99	<2.2e-16	0.99	<2.2e-16	0.99	<2.2e-16	0.92
H2BK20AC	NA	NA	NA	NA	NA	NA	NA	NA	NA	NA	NA	NA	NA	NA	NA	NA	NA	NA	NA	NA	NA	NA	NA	NA	0.93	<2.2e-16	0.95	<2.2e-16	0.94	<2.2e-16	0.96	<2.2e-16	0.94	<2.2e-16	0.96	<2.2e-16	0.99	<2.2e-16	0.99	<2.2e-16	0.99	<2.2e-16	0.99	<2.2e-16	0.99	<2.2e-16	0.99	<2.2e-16	0.88
H2BK5AC	NA	NA	NA	NA	NA	NA	NA	NA	NA	NA	NA	NA	NA	NA	NA	NA	NA	NA	NA	NA	NA	NA	NA	NA	0.97	<2.2e-16	0.97	<2.2e-16	0.97	<2.2e-16	0.97	<2.2e-16	0.96	<2.2e-16	0.97	<2.2e-16	0.99	<2.2e-16	0.99	<2.2e-16	0.99	<2.2e-16	1	<2.2e-16	0.99	<2.2e-16	0.99	<2.2e-16	0.95
H3K14AC	NA	NA	NA	NA	NA	NA	NA	NA	NA	NA	NA	NA	NA	NA	NA	NA	NA	NA	NA	NA	NA	NA	NA	NA	0.95	<2.2e-16	0.95	<2.2e-16	0.94	<2.2e-16	0.95	<2.2e-16	0.92	<2.2e-16	0.94	<2.2e-16	0.99	<2.2e-16	0.99	<2.2e-16	0.98	<2.2e-16	0.99	<2.2e-16	0.99	<2.2e-16	0.99	<2.2e-16	0.98
H3K18AC	NA	NA	NA	NA	NA	NA	NA	NA	NA	NA	NA	NA	NA	NA	NA	NA	NA	NA	NA	NA	NA	NA	NA	NA	0.96	<2.2e-16	0.97	<2.2e-16	0.96	<2.2e-16	0.97	<2.2e-16	0.95	<2.2e-16	0.96	<2.2e-16	0.99	<2.2e-16	0.99	<2.2e-16	0.99	<2.2e-16	0.99	<2.2e-16	0.99	<2.2e-16	0.99	<2.2e-16	0.98
H3K23AC	NA	NA	NA	NA	NA	NA	NA	NA	NA	NA	NA	NA	NA	NA	NA	NA	NA	NA	NA	NA	NA	NA	NA	NA	0.92	<2.2e-16	0.93	<2.2e-16	0.91	<2.2e-16	0.93	<2.2e-16	0.9	<2.2e-16	0.92	<2.2e-16	0.99	<2.2e-16	0.99	<2.2e-16	0.98	<2.2e-16	0.99	<2.2e-16	0.98	<2.2e-16	0.99	<2.2e-16	0.88
H3K23ME2	NA	NA	NA	NA	NA	NA	NA	NA	NA	NA	NA	NA	NA	NA	NA	NA	NA	NA	NA	NA	NA	NA	NA	NA	0.94	<2.2e-16	0.93	<2.2e-16	0.91	<2.2e-16	0.9	<2.2e-16	0.86	<2.2e-16	0.86	<2.2e-16	NA	NA	NA	NA	NA	NA	NA	NA	NA	NA	NA	NA	0.92
H3K27AC	0.98	<2.2e-16	0.98	<2.2e-16	0.97	<2.2e-16	0.98	<2.2e-16	0.97	<2.2e-16	0.97	<2.2e-16	0.96	<2.2e-16	0.95	<2.2e-16	0.94	<2.2e-16	0.95	<2.2e-16	0.95	<2.2e-16	0.94	<2.2e-16	0.96	<2.2e-16	0.96	<2.2e-16	0.94	<2.2e-16	0.95	<2.2e-16	0.93	<2.2e-16	0.93	<2.2e-16	0.99	<2.2e-16	1	<2.2e-16	1	<2.2e-16	1	<2.2e-16	0.99	<2.2e-16	1	<2.2e-16	0.91
H3K27ME3	0.93	<2.2e-16	0.93	<2.2e-16	0.92	<2.2e-16	0.93	<2.2e-16	0.91	<2.2e-16	0.94	<2.2e-16	0.92	<2.2e-16	0.89	<2.2e-16	0.85	<2.2e-16	0.87	<2.2e-16	0.83	<2.2e-16	0.84	<2.2e-16	0.96	<2.2e-16	0.97	<2.2e-16	0.97	<2.2e-16	0.96	<2.2e-16	0.94	<2.2e-16	0.96	<2.2e-16	0.73	<2.2e-16	0.73	<2.2e-16	0.7	<2.2e-16	0.7	<2.2e-16	0.67	<2.2e-16	0.72	<2.2e-16	0.73
H3K36ME3	0.87	<2.2e-16	0.92	<2.2e-16	0.89	<2.2e-16	0.84	<2.2e-16	0.8	<2.2e-16	0.84	<2.2e-16	0.7	<2.2e-16	0.87	<2.2e-16	0.84	<2.2e-16	0.7	<2.2e-16	0.69	<2.2e-16	0.73	<2.2e-16	0.72	<2.2e-16	0.81	<2.2e-16	0.8	<2.2e-16	0.69	<2.2e-16	0.65	<2.2e-16	0.69	<2.2e-16	0.76	<2.2e-16	0.86	<2.2e-16	0.86	<2.2e-16	0.81	<2.2e-16	0.8	<2.2e-16	0.83	<2.2e-16	0.59
H3K4AC	NA	NA	NA	NA	NA	NA	NA	NA	NA	NA	NA	NA	NA	NA	NA	NA	NA	NA	NA	NA	NA	NA	NA	NA	0.95	<2.2e-16	0.96	<2.2e-16	0.95	<2.2e-16	0.96	<2.2e-16	0.93	<2.2e-16	0.95	<2.2e-16	1	<2.2e-16	0.99	<2.2e-16	0.99	<2.2e-16	1	<2.2e-16	0.99	<2.2e-16	1	<2.2e-16	0.96
H3K4ME1	0.91	<2.2e-16	0.92	<2.2e-16	0.92	<2.2e-16	0.94	<2.2e-16	0.92	<2.2e-16	0.94	<2.2e-16	0.88	<2.2e-16	0.92	<2.2e-16	0.92	<2.2e-16	0.92	<2.2e-16	0.89	<2.2e-16	0.91	<2.2e-16	0.89	<2.2e-16	0.92	<2.2e-16	0.91	<2.2e-16	0.9	<2.2e-16	0.86	<2.2e-16	0.9	<2.2e-16	0.95	<2.2e-16	0.96	<2.2e-16	0.96	<2.2e-16	0.97	<2.2e-16	0.96	<2.2e-16	0.97	<2.2e-16	0.8
H3K4ME2	0.99	<2.2e-16	0.99	<2.2e-16	0.99	<2.2e-16	0.99	<2.2e-16	0.98	<2.2e-16	0.99	<2.2e-16	0.97	<2.2e-16	0.98	<2.2e-16	0.97	<2.2e-16	0.97	<2.2e-16	0.96	<2.2e-16	0.97	<2.2e-16	0.98	<2.2e-16	0.98	<2.2e-16	0.98	<2.2e-16	0.98	<2.2e-16	0.97	<2.2e-16	0.97	<2.2e-16	0.98	<2.2e-16	0.98	<2.2e-16	0.97	<2.2e-16	0.98	<2.2e-16	0.97	<2.2e-16	0.97	<2.2e-16	0.98
H3K4ME3	0.99	<2.2e-16	0.99	<2.2e-16	0.99	<2.2e-16	0.99	<2.2e-16	0.99	<2.2e-16	0.99	<2.2e-16	0.98	<2.2e-16	0.98	<2.2e-16	0.98	<2.2e-16	0.98	<2.2e-16	0.97	<2.2e-16	0.97	<2.2e-16	0.98	<2.2e-16	0.98	<2.2e-16	0.97	<2.2e-16	0.98	<2.2e-16	0.97	<2.2e-16	0.97	<2.2e-16	0.99	<2.2e-16	0.98	<2.2e-16	0.98	<2.2e-16	0.98	<2.2e-16	0.97	<2.2e-16	0.98	<2.2e-16	0.98
H3K56AC	NA	NA	NA	NA	NA	NA	NA	NA	NA	NA	NA	NA	NA	NA	NA	NA	NA	NA	NA	NA	NA	NA	NA	NA	0.94	<2.2e-16	0.94	<2.2e-16	0.9	<2.2e-16	0.93	<2.2e-16	0.89	<2.2e-16	0.91	<2.2e-16	0.98	<2.2e-16	0.98	<2.2e-16	0.97	<2.2e-16	0.98	<2.2e-16	0.97	<2.2e-16	0.98	<2.2e-16	0.93
H3K79ME1	NA	NA	NA	NA	NA	NA	NA	NA	NA	NA	NA	NA	NA	NA	NA	NA	NA	NA	NA	NA	NA	NA	NA	NA	0.9	<2.2e-16	0.93	<2.2e-16	0.9	<2.2e-16	0.9	<2.2e-16	0.84	<2.2e-16	0.89	<2.2e-16	0.95	<2.2e-16	0.96	<2.2e-16	0.95	<2.2e-16	0.95	<2.2e-16	0.95	<2.2e-16	0.96	<2.2e-16	0.86
H3K79ME2	0.95	<2.2e-16	0.94	<2.2e-16	0.92	<2.2e-16	0.93	<2.2e-16	0.88	<2.2e-16	0.9	<2.2e-16	0.96	<2.2e-16	0.94	<2.2e-16	0.92	<2.2e-16	0.94	<2.2e-16	0.89	<2.2e-16	0.9	<2.2e-16	0.89	<2.2e-16	0.92	<2.2e-16	0.92	<2.2e-16	0.91	<2.2e-16	0.87	<2.2e-16	0.91	<2.2e-16	0.93	<2.2e-16	0.94	<2.2e-16	0.91	<2.2e-16	0.93	<2.2e-16	0.9	<2.2e-16	0.92	<2.2e-16	0.86
H3K9AC	0.99	<2.2e-16	0.99	<2.2e-16	0.99	<2.2e-16	0.99	<2.2e-16	0.99	<2.2e-16	0.99	<2.2e-16	0.98	<2.2e-16	0.98	<2.2e-16	0.98	<2.2e-16	0.98	<2.2e-16	0.97	<2.2e-16	0.98	<2.2e-16	0.97	<2.2e-16	0.97	<2.2e-16	0.96	<2.2e-16	0.97	<2.2e-16	0.94	<2.2e-16	0.95	<2.2e-16	0.99	<2.2e-16	0.99	<2.2e-16	0.99	<2.2e-16	0.99	<2.2e-16	0.98	<2.2e-16	0.98	<2.2e-16	0.97
H3K9ME1	0.89	<2.2e-16	0.93	<2.2e-16	0.91	<2.2e-16	0.91	<2.2e-16	0.87	<2.2e-16	0.91	<2.2e-16	NA	NA	NA	NA	NA	NA	NA	NA	NA	NA	NA	NA	NA	NA	NA	NA	NA	NA	NA	NA	NA	NA	NA	NA	0.91	<2.2e-16	0.95	<2.2e-16	0.92	<2.2e-16	0.95	<2.2e-16	0.94	<2.2e-16	0.96	<2.2e-16	NA
H3K9ME3	0.79	<2.2e-16	0.84	<2.2e-16	0.8	<2.2e-16	0.77	<2.2e-16	0.72	<2.2e-16	0.78	<2.2e-16	0.42	<2.2e-16	0.48	<2.2e-16	0.46	<2.2e-16	0.5	<2.2e-16	0.46	<2.2e-16	0.51	<2.2e-16	0.71	<2.2e-16	0.81	<2.2e-16	0.79	<2.2e-16	0.75	<2.2e-16	0.71	<2.2e-16	0.77	<2.2e-16	0.6	<2.2e-16	0.53	<2.2e-16	0.47	<2.2e-16	0.49	<2.2e-16	0.46	<2.2e-16	0.48	<2.2e-16	0.86
H3T11PH	NA	NA	NA	NA	NA	NA	NA	NA	NA	NA	NA	NA	NA	NA	NA	NA	NA	NA	NA	NA	NA	NA	NA	NA	NA	NA	NA	NA	NA	NA	NA	NA	NA	NA	NA	NA	NA	NA	NA	NA	NA	NA	NA	NA	NA	NA	NA	NA	0.94
H4K20ME1	0.88	<2.2e-16	0.92	<2.2e-16	0.9	<2.2e-16	0.9	<2.2e-16	0.87	<2.2e-16	0.91	<2.2e-16	0.73	<2.2e-16	0.85	<2.2e-16	0.83	<2.2e-16	0.81	<2.2e-16	0.78	<2.2e-16	0.81	<2.2e-16	0.88	<2.2e-16	0.94	<2.2e-16	0.91	<2.2e-16	0.89	<2.2e-16	0.85	<2.2e-16	0.89	<2.2e-16	0.87	<2.2e-16	0.92	<2.2e-16	0.88	<2.2e-16	0.9	<2.2e-16	0.87	<2.2e-16	0.9	<2.2e-16	0.8
H4K5AC	NA	NA	NA	NA	NA	NA	NA	NA	NA	NA	NA	NA	NA	NA	NA	NA	NA	NA	NA	NA	NA	NA	NA	NA	0.95	<2.2e-16	0.94	<2.2e-16	0.92	<2.2e-16	0.93	<2.2e-16	0.91	<2.2e-16	0.91	<2.2e-16	0.99	<2.2e-16	0.99	<2.2e-16	0.99	<2.2e-16	0.99	<2.2e-16	0.99	<2.2e-16	0.99	<2.2e-16	0.94
H4K8AC	NA	NA	NA	NA	NA	NA	NA	NA	NA	NA	NA	NA	NA	NA	NA	NA	NA	NA	NA	NA	NA	NA	NA	NA	0.93	<2.2e-16	0.95	<2.2e-16	0.94	<2.2e-16	0.94	<2.2e-16	0.91	<2.2e-16	0.93	<2.2e-16	0.99	<2.2e-16	0.99	<2.2e-16	0.99	<2.2e-16	0.99	<2.2e-16	0.99	<2.2e-16	0.99	<2.2e-16	0.9
H4K91AC	NA	NA	NA	NA	NA	NA	NA	NA	NA	NA	NA	NA	NA	NA	NA	NA	NA	NA	NA	NA	NA	NA	NA	NA	0.96	<2.2e-16	0.97	<2.2e-16	0.97	<2.2e-16	0.97	<2.2e-16	0.95	<2.2e-16	0.97	<2.2e-16	0.99	<2.2e-16	0.99	<2.2e-16	0.98	<2.2e-16	0.99	<2.2e-16	0.98	<2.2e-16	0.99	<2.2e-16	0.9
HCFC1	0.98	<2.2e-16	0.98	<2.2e-16	0.97	<2.2e-16	0.97	<2.2e-16	0.96	<2.2e-16	0.97	<2.2e-16	NA	NA	NA	NA	NA	NA	NA	NA	NA	NA	NA	NA	NA	NA	NA	NA	NA	NA	NA	NA	NA	NA	NA	NA	NA	NA	NA	NA	NA	NA	NA	NA	NA	NA	NA	NA	NA
HDAC1	0.98	<2.2e-16	0.98	<2.2e-16	0.97	<2.2e-16	0.98	<2.2e-16	0.96	<2.2e-16	0.96	<2.2e-16	NA	NA	NA	NA	NA	NA	NA	NA	NA	NA	NA	NA	NA	NA	NA	NA	NA	NA	NA	NA	NA	NA	NA	NA	NA	NA	NA	NA	NA	NA	NA	NA	NA	NA	NA	NA	NA
HDAC2	0.96	<2.2e-16	0.97	<2.2e-16	0.96	<2.2e-16	0.96	<2.2e-16	0.94	<2.2e-16	0.95	<2.2e-16	NA	NA	NA	NA	NA	NA	NA	NA	NA	NA	NA	NA	0.96	<2.2e-16	0.97	<2.2e-16	0.96	<2.2e-16	0.96	<2.2e-16	0.95	<2.2e-16	0.95	<2.2e-16	NA	NA	NA	NA	NA	NA	NA	NA	NA	NA	NA	NA	NA
HDAC6	0.92	<2.2e-16	0.95	<2.2e-16	0.94	<2.2e-16	0.93	<2.2e-16	0.9	<2.2e-16	0.92	<2.2e-16	NA	NA	NA	NA	NA	NA	NA	NA	NA	NA	NA	NA	0.79	<2.2e-16	0.88	<2.2e-16	0.84	<2.2e-16	0.83	<2.2e-16	0.77	<2.2e-16	0.81	<2.2e-16	NA	NA	NA	NA	NA	NA	NA	NA	NA	NA	NA	NA	NA
HMGN3	0.98	<2.2e-16	0.98	<2.2e-16	0.97	<2.2e-16	0.98	<2.2e-16	0.96	<2.2e-16	0.97	<2.2e-16	NA	NA	NA	NA	NA	NA	NA	NA	NA	NA	NA	NA	NA	NA	NA	NA	NA	NA	NA	NA	NA	NA	NA	NA	NA	NA	NA	NA	NA	NA	NA	NA	NA	NA	NA	NA	NA
IKZF1	NA	NA	NA	NA	NA	NA	NA	NA	NA	NA	NA	NA	0.88	<2.2e-16	0.93	<2.2e-16	0.92	<2.2e-16	0.91	<2.2e-16	0.89	<2.2e-16	0.91	<2.2e-16	NA	NA	NA	NA	NA	NA	NA	NA	NA	NA	NA	NA	NA	NA	NA	NA	NA	NA	NA	NA	NA	NA	NA	NA	NA
IRF1	0.92	<2.2e-16	0.92	<2.2e-16	0.89	<2.2e-16	0.91	<2.2e-16	0.87	<2.2e-16	0.91	<2.2e-16	NA	NA	NA	NA	NA	NA	NA	NA	NA	NA	NA	NA	NA	NA	NA	NA	NA	NA	NA	NA	NA	NA	NA	NA	NA	NA	NA	NA	NA	NA	NA	NA	NA	NA	NA	NA	NA
IRF3	NA	NA	NA	NA	NA	NA	NA	NA	NA	NA	NA	NA	0.96	<2.2e-16	0.94	<2.2e-16	0.9	<2.2e-16	0.93	<2.2e-16	0.88	<2.2e-16	0.91	<2.2e-16	NA	NA	NA	NA	NA	NA	NA	NA	NA	NA	NA	NA	NA	NA	NA	NA	NA	NA	NA	NA	NA	NA	NA	NA	NA
IRF4	NA	NA	NA	NA	NA	NA	NA	NA	NA	NA	NA	NA	0.85	<2.2e-16	0.87	<2.2e-16	0.88	<2.2e-16	0.93	<2.2e-16	0.9	<2.2e-16	0.91	<2.2e-16	NA	NA	NA	NA	NA	NA	NA	NA	NA	NA	NA	NA	NA	NA	NA	NA	NA	NA	NA	NA	NA	NA	NA	NA	NA
JARID1A	NA	NA	NA	NA	NA	NA	NA	NA	NA	NA	NA	NA	NA	NA	NA	NA	NA	NA	NA	NA	NA	NA	NA	NA	0.79	<2.2e-16	0.8	<2.2e-16	0.71	<2.2e-16	0.74	<2.2e-16	0.68	<2.2e-16	0.69	<2.2e-16	NA	NA	NA	NA	NA	NA	NA	NA	NA	NA	NA	NA	NA
JARID1B-PLU1	0.97	<2.2e-16	0.97	<2.2e-16	0.95	<2.2e-16	0.97	<2.2e-16	0.96	<2.2e-16	0.96	<2.2e-16	NA	NA	NA	NA	NA	NA	NA	NA	NA	NA	NA	NA	0.74	<2.2e-16	0.84	<2.2e-16	0.74	<2.2e-16	0.79	<2.2e-16	0.72	<2.2e-16	0.75	<2.2e-16	NA	NA	NA	NA	NA	NA	NA	NA	NA	NA	NA	NA	NA
JMJD2	NA	NA	NA	NA	NA	NA	NA	NA	NA	NA	NA	NA	NA	NA	NA	NA	NA	NA	NA	NA	NA	NA	NA	NA	0.94	<2.2e-16	0.96	<2.2e-16	0.95	<2.2e-16	0.96	<2.2e-16	0.94	<2.2e-16	0.95	<2.2e-16	NA	NA	NA	NA	NA	NA	NA	NA	NA	NA	NA	NA	NA
JUN	0.98	<2.2e-16	0.98	<2.2e-16	0.97	<2.2e-16	0.98	<2.2e-16	0.97	<2.2e-16	0.97	<2.2e-16	NA	NA	NA	NA	NA	NA	NA	NA	NA	NA	NA	NA	0.91	<2.2e-16	0.92	<2.2e-16	0.88	<2.2e-16	0.92	<2.2e-16	0.87	<2.2e-16	0.9	<2.2e-16	NA	NA	NA	NA	NA	NA	NA	NA	NA	NA	NA	NA	NA
JUND (AND EGFP-JUND)	0.95	<2.2e-16	0.97	<2.2e-16	0.97	<2.2e-16	0.97	<2.2e-16	0.97	<2.2e-16	0.98	<2.2e-16	0.94	<2.2e-16	0.94	<2.2e-16	0.92	<2.2e-16	0.94	<2.2e-16	0.9	<2.2e-16	0.92	<2.2e-16	0.9	<2.2e-16	0.94	<2.2e-16	0.94	<2.2e-16	0.94	<2.2e-16	0.93	<2.2e-16	0.93	<2.2e-16	NA	NA	NA	NA	NA	NA	NA	NA	NA	NA	NA	NA	NA
KAP1	0.94	<2.2e-16	0.94	<2.2e-16	0.91	<2.2e-16	0.92	<2.2e-16	0.88	<2.2e-16	0.91	<2.2e-16	NA	NA	NA	NA	NA	NA	NA	NA	NA	NA	NA	NA	NA	NA	NA	NA	NA	NA	NA	NA	NA	NA	NA	NA	NA	NA	NA	NA	NA	NA	NA	NA	NA	NA	NA	NA	NA
KAT2A-GCN5	NA	NA	NA	NA	NA	NA	NA	NA	NA	NA	NA	NA	0.9	<2.2e-16	0.91	<2.2e-16	0.86	<2.2e-16	0.88	<2.2e-16	0.83	<2.2e-16	0.87	<2.2e-16	NA	NA	NA	NA	NA	NA	NA	NA	NA	NA	NA	NA	NA	NA	NA	NA	NA	NA	NA	NA	NA	NA	NA	NA	NA
KAT2B-PCAF	0.9	<2.2e-16	0.9	<2.2e-16	0.85	<2.2e-16	0.88	<2.2e-16	0.84	<2.2e-16	0.86	<2.2e-16	NA	NA	NA	NA	NA	NA	NA	NA	NA	NA	NA	NA	NA	NA	NA	NA	NA	NA	NA	NA	NA	NA	NA	NA	NA	NA	NA	NA	NA	NA	NA	NA	NA	NA	NA	NA	NA
KDM1A-LSD1	0.91	<2.2e-16	0.92	<2.2e-16	0.9	<2.2e-16	0.92	<2.2e-16	0.89	<2.2e-16	0.92	<2.2e-16	NA	NA	NA	NA	NA	NA	NA	NA	NA	NA	NA	NA	NA	NA	NA	NA	NA	NA	NA	NA	NA	NA	NA	NA	NA	NA	NA	NA	NA	NA	NA	NA	NA	NA	NA	NA	NA
MAFF	0.96	<2.2e-16	0.96	<2.2e-16	0.95	<2.2e-16	0.96	<2.2e-16	0.93	<2.2e-16	0.95	<2.2e-16	NA	NA	NA	NA	NA	NA	NA	NA	NA	NA	NA	NA	NA	NA	NA	NA	NA	NA	NA	NA	NA	NA	NA	NA	NA	NA	NA	NA	NA	NA	NA	NA	NA	NA	NA	NA	NA
MAFK	0.97	<2.2e-16	0.97	<2.2e-16	0.96	<2.2e-16	0.97	<2.2e-16	0.95	<2.2e-16	0.97	<2.2e-16	0.95	<2.2e-16	0.95	<2.2e-16	0.93	<2.2e-16	0.95	<2.2e-16	0.92	<2.2e-16	0.93	<2.2e-16	0.83	<2.2e-16	0.88	<2.2e-16	0.85	<2.2e-16	0.86	<2.2e-16	0.84	<2.2e-16	0.87	<2.2e-16	0.77	<2.2e-16	0.8	<2.2e-16	0.73	<2.2e-16	0.77	<2.2e-16	0.79	<2.2e-16	0.75	<2.2e-16	NA
MAX	0.97	<2.2e-16	0.98	<2.2e-16	0.97	<2.2e-16	0.98	<2.2e-16	0.97	<2.2e-16	0.98	<2.2e-16	0.97	<2.2e-16	0.98	<2.2e-16	0.97	<2.2e-16	0.98	<2.2e-16	0.97	<2.2e-16	0.97	<2.2e-16	0.96	<2.2e-16	0.97	<2.2e-16	0.96	<2.2e-16	0.97	<2.2e-16	0.95	<2.2e-16	0.96	<2.2e-16	NA	NA	NA	NA	NA	NA	NA	NA	NA	NA	NA	NA	NA
MAZ	0.95	<2.2e-16	0.97	<2.2e-16	0.97	<2.2e-16	0.97	<2.2e-16	0.97	<2.2e-16	0.97	<2.2e-16	0.93	<2.2e-16	0.96	<2.2e-16	0.96	<2.2e-16	0.96	<2.2e-16	0.96	<2.2e-16	0.96	<2.2e-16	NA	NA	NA	NA	NA	NA	NA	NA	NA	NA	NA	NA	0.89	<2.2e-16	0.93	<2.2e-16	0.92	<2.2e-16	0.93	<2.2e-16	0.93	<2.2e-16	0.94	<2.2e-16	NA
MEF2A	0.84	<2.2e-16	0.83	<2.2e-16	0.78	<2.2e-16	0.81	<2.2e-16	0.71	<2.2e-16	0.77	<2.2e-16	0.89	<2.2e-16	0.89	<2.2e-16	0.88	<2.2e-16	0.92	<2.2e-16	0.86	<2.2e-16	0.9	<2.2e-16	NA	NA	NA	NA	NA	NA	NA	NA	NA	NA	NA	NA	NA	NA	NA	NA	NA	NA	NA	NA	NA	NA	NA	NA	NA
MEF2C	NA	NA	NA	NA	NA	NA	NA	NA	NA	NA	NA	NA	0.86	<2.2e-16	0.85	<2.2e-16	0.86	<2.2e-16	0.9	<2.2e-16	0.85	<2.2e-16	0.89	<2.2e-16	NA	NA	NA	NA	NA	NA	NA	NA	NA	NA	NA	NA	NA	NA	NA	NA	NA	NA	NA	NA	NA	NA	NA	NA	NA
MTA3	NA	NA	NA	NA	NA	NA	NA	NA	NA	NA	NA	NA	0.97	<2.2e-16	0.97	<2.2e-16	0.97	<2.2e-16	0.97	<2.2e-16	0.96	<2.2e-16	0.97	<2.2e-16	NA	NA	NA	NA	NA	NA	NA	NA	NA	NA	NA	NA	NA	NA	NA	NA	NA	NA	NA	NA	NA	NA	NA	NA	NA
MXI1	0.96	<2.2e-16	0.97	<2.2e-16	0.96	<2.2e-16	0.96	<2.2e-16	0.94	<2.2e-16	0.95	<2.2e-16	0.96	<2.2e-16	0.97	<2.2e-16	0.97	<2.2e-16	0.98	<2.2e-16	0.97	<2.2e-16	0.97	<2.2e-16	0.95	<2.2e-16	0.97	<2.2e-16	0.96	<2.2e-16	0.96	<2.2e-16	0.95	<2.2e-16	0.95	<2.2e-16	0.86	<2.2e-16	0.92	<2.2e-16	0.92	<2.2e-16	0.93	<2.2e-16	0.92	<2.2e-16	0.92	<2.2e-16	NA
MYC	0.95	<2.2e-16	0.96	<2.2e-16	0.95	<2.2e-16	0.95	<2.2e-16	0.93	<2.2e-16	0.95	<2.2e-16	0.92	<2.2e-16	0.92	<2.2e-16	0.89	<2.2e-16	0.9	<2.2e-16	0.84	<2.2e-16	0.87	<2.2e-16	0.95	<2.2e-16	0.95	<2.2e-16	0.93	<2.2e-16	0.94	<2.2e-16	0.92	<2.2e-16	0.93	<2.2e-16	NA	NA	NA	NA	NA	NA	NA	NA	NA	NA	NA	NA	NA
NANOG	NA	NA	NA	NA	NA	NA	NA	NA	NA	NA	NA	NA	NA	NA	NA	NA	NA	NA	NA	NA	NA	NA	NA	NA	0.85	<2.2e-16	0.89	<2.2e-16	0.87	<2.2e-16	0.87	<2.2e-16	0.81	<2.2e-16	0.85	<2.2e-16	NA	NA	NA	NA	NA	NA	NA	NA	NA	NA	NA	NA	NA
NCOR1	0.86	<2.2e-16	0.86	<2.2e-16	0.8	<2.2e-16	0.86	<2.2e-16	0.82	<2.2e-16	0.84	<2.2e-16	NA	NA	NA	NA	NA	NA	NA	NA	NA	NA	NA	NA	NA	NA	NA	NA	NA	NA	NA	NA	NA	NA	NA	NA	NA	NA	NA	NA	NA	NA	NA	NA	NA	NA	NA	NA	NA
NFATC1	NA	NA	NA	NA	NA	NA	NA	NA	NA	NA	NA	NA	0.93	<2.2e-16	0.95	<2.2e-16	0.95	<2.2e-16	0.94	<2.2e-16	0.91	<2.2e-16	0.94	<2.2e-16	NA	NA	NA	NA	NA	NA	NA	NA	NA	NA	NA	NA	NA	NA	NA	NA	NA	NA	NA	NA	NA	NA	NA	NA	NA
NFE2	0.89	<2.2e-16	0.91	<2.2e-16	0.88	<2.2e-16	0.89	<2.2e-16	0.83	<2.2e-16	0.89	<2.2e-16	0.94	<2.2e-16	0.91	<2.2e-16	0.86	<2.2e-16	0.91	<2.2e-16	0.85	<2.2e-16	0.89	<2.2e-16	NA	NA	NA	NA	NA	NA	NA	NA	NA	NA	NA	NA	NA	NA	NA	NA	NA	NA	NA	NA	NA	NA	NA	NA	NA
NFIC	NA	NA	NA	NA	NA	NA	NA	NA	NA	NA	NA	NA	0.96	<2.2e-16	0.96	<2.2e-16	0.97	<2.2e-16	0.97	<2.2e-16	0.95	<2.2e-16	0.97	<2.2e-16	NA	NA	NA	NA	NA	NA	NA	NA	NA	NA	NA	NA	NA	NA	NA	NA	NA	NA	NA	NA	NA	NA	NA	NA	NA
NFYA	0.96	<2.2e-16	0.95	<2.2e-16	0.93	<2.2e-16	0.93	<2.2e-16	0.88	<2.2e-16	0.92	<2.2e-16	0.95	<2.2e-16	0.9	<2.2e-16	0.85	<2.2e-16	0.87	<2.2e-16	0.81	<2.2e-16	0.85	<2.2e-16	NA	NA	NA	NA	NA	NA	NA	NA	NA	NA	NA	NA	NA	NA	NA	NA	NA	NA	NA	NA	NA	NA	NA	NA	NA
NFYB	0.89	<2.2e-16	0.88	<2.2e-16	0.87	<2.2e-16	0.87	<2.2e-16	0.74	<2.2e-16	0.82	<2.2e-16	0.92	<2.2e-16	0.86	<2.2e-16	0.83	<2.2e-16	0.82	<2.2e-16	0.72	<2.2e-16	0.77	<2.2e-16	NA	NA	NA	NA	NA	NA	NA	NA	NA	NA	NA	NA	NA	NA	NA	NA	NA	NA	NA	NA	NA	NA	NA	NA	NA
NR2F2	0.94	<2.2e-16	0.94	<2.2e-16	0.93	<2.2e-16	0.94	<2.2e-16	0.92	<2.2e-16	0.93	<2.2e-16	NA	NA	NA	NA	NA	NA	NA	NA	NA	NA	NA	NA	NA	NA	NA	NA	NA	NA	NA	NA	NA	NA	NA	NA	NA	NA	NA	NA	NA	NA	NA	NA	NA	NA	NA	NA	NA
NRF1	0.75	<2.2e-16	0.88	<2.2e-16	0.88	<2.2e-16	0.88	<2.2e-16	0.87	<2.2e-16	0.9	<2.2e-16	0.72	<2.2e-16	0.84	<2.2e-16	0.88	<2.2e-16	0.86	<2.2e-16	0.91	<2.2e-16	0.92	<2.2e-16	0.61	<2.2e-16	0.82	<2.2e-16	0.84	<2.2e-16	0.83	<2.2e-16	0.87	<2.2e-16	0.9	<2.2e-16	NA	NA	NA	NA	NA	NA	NA	NA	NA	NA	NA	NA	NA
NRSF	NA	NA	NA	NA	NA	NA	NA	NA	NA	NA	NA	NA	NA	NA	NA	NA	NA	NA	NA	NA	NA	NA	NA	NA	0.43	<2.2e-16	0.39	<2.2e-16	0.37	<2.2e-16	0.47	<2.2e-16	0.44	<2.2e-16	0.4	<2.2e-16	NA	NA	NA	NA	NA	NA	NA	NA	NA	NA	NA	NA	NA
NRSF-REST	NA	NA	NA	NA	NA	NA	NA	NA	NA	NA	NA	NA	0.26	<2.2e-16	0.29	<2.2e-16	0.35	<2.2e-16	0.46	<2.2e-16	0.34	<2.2e-16	0.47	<2.2e-16	NA	NA	NA	NA	NA	NA	NA	NA	NA	NA	NA	NA	NA	NA	NA	NA	NA	NA	NA	NA	NA	NA	NA	NA	NA
P300	0.96	<2.2e-16	0.96	<2.2e-16	0.93	<2.2e-16	0.95	<2.2e-16	0.92	<2.2e-16	0.93	<2.2e-16	0.97	<2.2e-16	0.97	<2.2e-16	0.96	<2.2e-16	0.96	<2.2e-16	0.95	<2.2e-16	0.96	<2.2e-16	0.86	<2.2e-16	0.91	<2.2e-16	0.89	<2.2e-16	0.9	<2.2e-16	0.86	<2.2e-16	0.87	<2.2e-16	NA	NA	NA	NA	NA	NA	NA	NA	NA	NA	NA	NA	NA
PAX5	NA	NA	NA	NA	NA	NA	NA	NA	NA	NA	NA	NA	0.82	<2.2e-16	0.89	<2.2e-16	0.89	<2.2e-16	0.93	<2.2e-16	0.92	<2.2e-16	0.92	<2.2e-16	NA	NA	NA	NA	NA	NA	NA	NA	NA	NA	NA	NA	NA	NA	NA	NA	NA	NA	NA	NA	NA	NA	NA	NA	NA
PBX3	NA	NA	NA	NA	NA	NA	NA	NA	NA	NA	NA	NA	0.77	<2.2e-16	0.77	<2.2e-16	0.78	<2.2e-16	0.8	<2.2e-16	0.79	<2.2e-16	0.79	<2.2e-16	NA	NA	NA	NA	NA	NA	NA	NA	NA	NA	NA	NA	NA	NA	NA	NA	NA	NA	NA	NA	NA	NA	NA	NA	NA
PHF8	0.96	<2.2e-16	0.96	<2.2e-16	0.95	<2.2e-16	0.96	<2.2e-16	0.95	<2.2e-16	0.96	<2.2e-16	NA	NA	NA	NA	NA	NA	NA	NA	NA	NA	NA	NA	NA	NA	NA	NA	NA	NA	NA	NA	NA	NA	NA	NA	NA	NA	NA	NA	NA	NA	NA	NA	NA	NA	NA	NA	NA
PML	0.95	<2.2e-16	0.95	<2.2e-16	0.93	<2.2e-16	0.94	<2.2e-16	0.91	<2.2e-16	0.94	<2.2e-16	0.98	<2.2e-16	0.98	<2.2e-16	0.98	<2.2e-16	0.97	<2.2e-16	0.97	<2.2e-16	0.97	<2.2e-16	NA	NA	NA	NA	NA	NA	NA	NA	NA	NA	NA	NA	NA	NA	NA	NA	NA	NA	NA	NA	NA	NA	NA	NA	NA
POL2	0.96	<2.2e-16	0.95	<2.2e-16	0.94	<2.2e-16	0.96	<2.2e-16	0.95	<2.2e-16	0.96	<2.2e-16	0.97	<2.2e-16	0.98	<2.2e-16	0.96	<2.2e-16	0.97	<2.2e-16	0.96	<2.2e-16	0.96	<2.2e-16	0.95	<2.2e-16	0.95	<2.2e-16	0.94	<2.2e-16	0.95	<2.2e-16	0.93	<2.2e-16	0.92	<2.2e-16	0.82	<2.2e-16	0.86	<2.2e-16	0.82	<2.2e-16	0.87	<2.2e-16	0.86	<2.2e-16	0.87	<2.2e-16	NA
POL3	0.73	<2.2e-16	0.75	<2.2e-16	0.65	<2.2e-16	0.69	<2.2e-16	0.61	<2.2e-16	0.68	<2.2e-16	0.82	<2.2e-16	0.8	<2.2e-16	0.7	<2.2e-16	0.76	<2.2e-16	0.65	<2.2e-16	0.71	<2.2e-16	NA	NA	NA	NA	NA	NA	NA	NA	NA	NA	NA	NA	NA	NA	NA	NA	NA	NA	NA	NA	NA	NA	NA	NA	NA
POU2F2	NA	NA	NA	NA	NA	NA	NA	NA	NA	NA	NA	NA	0.93	<2.2e-16	0.94	<2.2e-16	0.92	<2.2e-16	0.94	<2.2e-16	0.92	<2.2e-16	0.93	<2.2e-16	NA	NA	NA	NA	NA	NA	NA	NA	NA	NA	NA	NA	NA	NA	NA	NA	NA	NA	NA	NA	NA	NA	NA	NA	NA
POU5F1	NA	NA	NA	NA	NA	NA	NA	NA	NA	NA	NA	NA	NA	NA	NA	NA	NA	NA	NA	NA	NA	NA	NA	NA	0.46	<2.2e-16	0.47	<2.2e-16	0.4	<2.2e-16	0.5	<2.2e-16	0.37	<2.2e-16	0.47	<2.2e-16	NA	NA	NA	NA	NA	NA	NA	NA	NA	NA	NA	NA	NA
RAD21	0.92	<2.2e-16	0.93	<2.2e-16	0.92	<2.2e-16	0.93	<2.2e-16	0.89	<2.2e-16	0.92	<2.2e-16	0.94	<2.2e-16	0.94	<2.2e-16	0.94	<2.2e-16	0.96	<2.2e-16	0.94	<2.2e-16	0.95	<2.2e-16	0.81	<2.2e-16	0.87	<2.2e-16	0.86	<2.2e-16	0.87	<2.2e-16	0.88	<2.2e-16	0.87	<2.2e-16	0.87	<2.2e-16	0.92	<2.2e-16	0.93	<2.2e-16	0.93	<2.2e-16	0.94	<2.2e-16	0.95	<2.2e-16	NA
RBBP5	0.96	<2.2e-16	0.97	<2.2e-16	0.96	<2.2e-16	0.97	<2.2e-16	0.95	<2.2e-16	0.97	<2.2e-16	NA	NA	NA	NA	NA	NA	NA	NA	NA	NA	NA	NA	0.94	<2.2e-16	0.97	<2.2e-16	0.96	<2.2e-16	0.96	<2.2e-16	0.95	<2.2e-16	0.96	<2.2e-16	NA	NA	NA	NA	NA	NA	NA	NA	NA	NA	NA	NA	NA
RDBP-NELF-E	0.92	<2.2e-16	0.92	<2.2e-16	0.86	<2.2e-16	0.88	<2.2e-16	0.81	<2.2e-16	0.85	<2.2e-16	NA	NA	NA	NA	NA	NA	NA	NA	NA	NA	NA	NA	NA	NA	NA	NA	NA	NA	NA	NA	NA	NA	NA	NA	NA	NA	NA	NA	NA	NA	NA	NA	NA	NA	NA	NA	NA
RELA	NA	NA	NA	NA	NA	NA	NA	NA	NA	NA	NA	NA	0.95	<2.2e-16	0.96	<2.2e-16	0.94	<2.2e-16	0.95	<2.2e-16	0.93	<2.2e-16	0.94	<2.2e-16	NA	NA	NA	NA	NA	NA	NA	NA	NA	NA	NA	NA	NA	NA	NA	NA	NA	NA	NA	NA	NA	NA	NA	NA	NA
REST	0.45	<2.2e-16	0.56	<2.2e-16	0.69	<2.2e-16	0.79	<2.2e-16	0.73	<2.2e-16	0.78	<2.2e-16	NA	NA	NA	NA	NA	NA	NA	NA	NA	NA	NA	NA	NA	NA	NA	NA	NA	NA	NA	NA	NA	NA	NA	NA	NA	NA	NA	NA	NA	NA	NA	NA	NA	NA	NA	NA	NA
RFX5	0.92	<2.2e-16	0.93	<2.2e-16	0.93	<2.2e-16	0.94	<2.2e-16	0.92	<2.2e-16	0.94	<2.2e-16	0.89	<2.2e-16	0.92	<2.2e-16	0.93	<2.2e-16	0.94	<2.2e-16	0.93	<2.2e-16	0.94	<2.2e-16	0.87	<2.2e-16	0.9	<2.2e-16	0.9	<2.2e-16	0.93	<2.2e-16	0.9	<2.2e-16	0.92	<2.2e-16	0.87	<2.2e-16	0.9	<2.2e-16	0.88	<2.2e-16	0.91	<2.2e-16	0.88	<2.2e-16	0.89	<2.2e-16	NA
RNF2	0.92	<2.2e-16	0.92	<2.2e-16	0.89	<2.2e-16	0.94	<2.2e-16	0.9	<2.2e-16	0.93	<2.2e-16	NA	NA	NA	NA	NA	NA	NA	NA	NA	NA	NA	NA	NA	NA	NA	NA	NA	NA	NA	NA	NA	NA	NA	NA	NA	NA	NA	NA	NA	NA	NA	NA	NA	NA	NA	NA	NA
RPC155	0.87	<2.2e-16	0.88	<2.2e-16	0.85	<2.2e-16	0.89	<2.2e-16	0.82	<2.2e-16	0.87	<2.2e-16	NA	NA	NA	NA	NA	NA	NA	NA	NA	NA	NA	NA	NA	NA	NA	NA	NA	NA	NA	NA	NA	NA	NA	NA	NA	NA	NA	NA	NA	NA	NA	NA	NA	NA	NA	NA	NA
RUNX3	NA	NA	NA	NA	NA	NA	NA	NA	NA	NA	NA	NA	0.9	<2.2e-16	0.93	<2.2e-16	0.92	<2.2e-16	0.93	<2.2e-16	0.92	<2.2e-16	0.93	<2.2e-16	NA	NA	NA	NA	NA	NA	NA	NA	NA	NA	NA	NA	NA	NA	NA	NA	NA	NA	NA	NA	NA	NA	NA	NA	NA
RXRA	NA	NA	NA	NA	NA	NA	NA	NA	NA	NA	NA	NA	0.81	<2.2e-16	0.8	<2.2e-16	0.77	<2.2e-16	0.84	<2.2e-16	0.76	<2.2e-16	0.81	<2.2e-16	0.36	<2.2e-16	0.37	<2.2e-16	0.34	<2.2e-16	0.42	<2.2e-16	0.31	<2.2e-16	0.32	<2.2e-16	NA	NA	NA	NA	NA	NA	NA	NA	NA	NA	NA	NA	NA
SAP30	0.98	<2.2e-16	0.97	<2.2e-16	0.95	<2.2e-16	0.96	<2.2e-16	0.92	<2.2e-16	0.93	<2.2e-16	NA	NA	NA	NA	NA	NA	NA	NA	NA	NA	NA	NA	0.94	<2.2e-16	0.95	<2.2e-16	0.94	<2.2e-16	0.95	<2.2e-16	0.91	<2.2e-16	0.92	<2.2e-16	NA	NA	NA	NA	NA	NA	NA	NA	NA	NA	NA	NA	NA
SETDB1	0.95	<2.2e-16	0.95	<2.2e-16	0.94	<2.2e-16	0.94	<2.2e-16	0.92	<2.2e-16	0.93	<2.2e-16	NA	NA	NA	NA	NA	NA	NA	NA	NA	NA	NA	NA	NA	NA	NA	NA	NA	NA	NA	NA	NA	NA	NA	NA	NA	NA	NA	NA	NA	NA	NA	NA	NA	NA	NA	NA	NA
SIN3A	NA	NA	NA	NA	NA	NA	NA	NA	NA	NA	NA	NA	0.97	<2.2e-16	0.97	<2.2e-16	0.96	<2.2e-16	0.97	<2.2e-16	0.94	<2.2e-16	0.95	<2.2e-16	0.98	<2.2e-16	0.98	<2.2e-16	0.98	<2.2e-16	0.98	<2.2e-16	0.97	<2.2e-16	0.98	<2.2e-16	NA	NA	NA	NA	NA	NA	NA	NA	NA	NA	NA	NA	NA
SIN3AK20	0.96	<2.2e-16	0.96	<2.2e-16	0.94	<2.2e-16	0.96	<2.2e-16	0.92	<2.2e-16	0.95	<2.2e-16	NA	NA	NA	NA	NA	NA	NA	NA	NA	NA	NA	NA	0.94	<2.2e-16	0.93	<2.2e-16	0.93	<2.2e-16	0.93	<2.2e-16	0.87	<2.2e-16	0.92	<2.2e-16	NA	NA	NA	NA	NA	NA	NA	NA	NA	NA	NA	NA	NA
SIRT6	0.96	<2.2e-16	0.95	<2.2e-16	0.93	<2.2e-16	0.95	<2.2e-16	0.92	<2.2e-16	0.95	<2.2e-16	NA	NA	NA	NA	NA	NA	NA	NA	NA	NA	NA	NA	0.89	<2.2e-16	0.93	<2.2e-16	0.92	<2.2e-16	0.89	<2.2e-16	0.85	<2.2e-16	0.88	<2.2e-16	NA	NA	NA	NA	NA	NA	NA	NA	NA	NA	NA	NA	NA
SIX5	0.97	<2.2e-16	0.94	<2.2e-16	0.89	<2.2e-16	0.88	<2.2e-16	0.59	<2.2e-16	0.72	<2.2e-16	0.96	<2.2e-16	0.9	<2.2e-16	0.86	<2.2e-16	0.86	<2.2e-16	0.75	<2.2e-16	0.82	<2.2e-16	0.94	<2.2e-16	0.86	<2.2e-16	0.7	<2.2e-16	0.68	<2.2e-16	0.41	<2.2e-16	0.41	<2.2e-16	NA	NA	NA	NA	NA	NA	NA	NA	NA	NA	NA	NA	NA
SMARCA4-BRG1	0.98	<2.2e-16	0.98	<2.2e-16	0.97	<2.2e-16	0.97	<2.2e-16	0.95	<2.2e-16	0.96	<2.2e-16	NA	NA	NA	NA	NA	NA	NA	NA	NA	NA	NA	NA	NA	NA	NA	NA	NA	NA	NA	NA	NA	NA	NA	NA	NA	NA	NA	NA	NA	NA	NA	NA	NA	NA	NA	NA	NA
SMARCB1-INI1	0.98	<2.2e-16	0.98	<2.2e-16	0.97	<2.2e-16	0.97	<2.2e-16	0.95	<2.2e-16	0.96	<2.2e-16	NA	NA	NA	NA	NA	NA	NA	NA	NA	NA	NA	NA	NA	NA	NA	NA	NA	NA	NA	NA	NA	NA	NA	NA	NA	NA	NA	NA	NA	NA	NA	NA	NA	NA	NA	NA	NA
SMC3	0.95	<2.2e-16	0.96	<2.2e-16	0.95	<2.2e-16	0.95	<2.2e-16	0.94	<2.2e-16	0.95	<2.2e-16	0.96	<2.2e-16	0.96	<2.2e-16	0.96	<2.2e-16	0.97	<2.2e-16	0.96	<2.2e-16	0.96	<2.2e-16	NA	NA	NA	NA	NA	NA	NA	NA	NA	NA	NA	NA	NA	NA	NA	NA	NA	NA	NA	NA	NA	NA	NA	NA	NA
SP1	0.88	<2.2e-16	0.87	<2.2e-16	0.86	<2.2e-16	0.86	<2.2e-16	0.77	<2.2e-16	0.85	<2.2e-16	0.91	<2.2e-16	0.88	<2.2e-16	0.9	<2.2e-16	0.9	<2.2e-16	0.89	<2.2e-16	0.9	<2.2e-16	0.86	<2.2e-16	0.84	<2.2e-16	0.87	<2.2e-16	0.85	<2.2e-16	0.8	<2.2e-16	0.82	<2.2e-16	NA	NA	NA	NA	NA	NA	NA	NA	NA	NA	NA	NA	NA
SP2	0.76	<2.2e-16	0.75	<2.2e-16	0.76	<2.2e-16	0.72	<2.2e-16	0.54	<2.2e-16	0.66	<2.2e-16	NA	NA	NA	NA	NA	NA	NA	NA	NA	NA	NA	NA	0.67	<2.2e-16	0.58	<2.2e-16	0.59	<2.2e-16	0.59	<2.2e-16	0.37	<2.2e-16	0.44	<2.2e-16	NA	NA	NA	NA	NA	NA	NA	NA	NA	NA	NA	NA	NA
SP4	NA	NA	NA	NA	NA	NA	NA	NA	NA	NA	NA	NA	NA	NA	NA	NA	NA	NA	NA	NA	NA	NA	NA	NA	0.81	<2.2e-16	0.88	<2.2e-16	0.91	<2.2e-16	0.89	<2.2e-16	0.87	<2.2e-16	0.89	<2.2e-16	NA	NA	NA	NA	NA	NA	NA	NA	NA	NA	NA	NA	NA
SPI1-PU1	0.55	<2.2e-16	0.63	<2.2e-16	0.62	<2.2e-16	0.74	<2.2e-16	0.71	<2.2e-16	0.73	<2.2e-16	0.59	<2.2e-16	0.64	<2.2e-16	0.63	<2.2e-16	0.69	<2.2e-16	0.65	<2.2e-16	0.68	<2.2e-16	NA	NA	NA	NA	NA	NA	NA	NA	NA	NA	NA	NA	NA	NA	NA	NA	NA	NA	NA	NA	NA	NA	NA	NA	NA
SREBP1	NA	NA	NA	NA	NA	NA	NA	NA	NA	NA	NA	NA	0.96	<2.2e-16	0.95	<2.2e-16	0.93	<2.2e-16	0.95	<2.2e-16	0.92	<2.2e-16	0.94	<2.2e-16	NA	NA	NA	NA	NA	NA	NA	NA	NA	NA	NA	NA	NA	NA	NA	NA	NA	NA	NA	NA	NA	NA	NA	NA	NA
SREBP2	NA	NA	NA	NA	NA	NA	NA	NA	NA	NA	NA	NA	0.95	<2.2e-16	0.95	<2.2e-16	0.93	<2.2e-16	0.94	<2.2e-16	0.91	<2.2e-16	0.93	<2.2e-16	NA	NA	NA	NA	NA	NA	NA	NA	NA	NA	NA	NA	NA	NA	NA	NA	NA	NA	NA	NA	NA	NA	NA	NA	NA
SRF	0.8	<2.2e-16	0.81	<2.2e-16	0.79	<2.2e-16	0.8	<2.2e-16	0.7	<2.2e-16	0.77	<2.2e-16	0.73	<2.2e-16	0.8	<2.2e-16	0.84	<2.2e-16	0.84	<2.2e-16	0.79	<2.2e-16	0.83	<2.2e-16	0.6	<2.2e-16	0.58	<2.2e-16	0.49	<2.2e-16	0.56	<2.2e-16	0.38	<2.2e-16	0.4	<2.2e-16	NA	NA	NA	NA	NA	NA	NA	NA	NA	NA	NA	NA	NA
STAT1	0.96	<2.2e-16	0.94	<2.2e-16	0.92	<2.2e-16	0.94	<2.2e-16	0.91	<2.2e-16	0.93	<2.2e-16	0.97	<2.2e-16	0.97	<2.2e-16	0.96	<2.2e-16	0.97	<2.2e-16	0.94	<2.2e-16	0.95	<2.2e-16	NA	NA	NA	NA	NA	NA	NA	NA	NA	NA	NA	NA	NA	NA	NA	NA	NA	NA	NA	NA	NA	NA	NA	NA	NA
STAT2	0.96	<2.2e-16	0.95	<2.2e-16	0.94	<2.2e-16	0.95	<2.2e-16	0.93	<2.2e-16	0.94	<2.2e-16	NA	NA	NA	NA	NA	NA	NA	NA	NA	NA	NA	NA	NA	NA	NA	NA	NA	NA	NA	NA	NA	NA	NA	NA	NA	NA	NA	NA	NA	NA	NA	NA	NA	NA	NA	NA	NA
STAT3	NA	NA	NA	NA	NA	NA	NA	NA	NA	NA	NA	NA	0.97	<2.2e-16	0.97	<2.2e-16	0.95	<2.2e-16	0.96	<2.2e-16	0.94	<2.2e-16	0.95	<2.2e-16	NA	NA	NA	NA	NA	NA	NA	NA	NA	NA	NA	NA	NA	NA	NA	NA	NA	NA	NA	NA	NA	NA	NA	NA	NA
STAT5A	0.86	<2.2e-16	0.88	<2.2e-16	0.87	<2.2e-16	0.86	<2.2e-16	0.82	<2.2e-16	0.88	<2.2e-16	0.96	<2.2e-16	0.97	<2.2e-16	0.96	<2.2e-16	0.97	<2.2e-16	0.94	<2.2e-16	0.96	<2.2e-16	NA	NA	NA	NA	NA	NA	NA	NA	NA	NA	NA	NA	NA	NA	NA	NA	NA	NA	NA	NA	NA	NA	NA	NA	NA
SUZ12	0.86	<2.2e-16	0.88	<2.2e-16	0.84	<2.2e-16	0.87	<2.2e-16	0.83	<2.2e-16	0.87	<2.2e-16	NA	NA	NA	NA	NA	NA	NA	NA	NA	NA	NA	NA	0.97	<2.2e-16	0.97	<2.2e-16	0.95	<2.2e-16	0.95	<2.2e-16	0.91	<2.2e-16	0.92	<2.2e-16	NA	NA	NA	NA	NA	NA	NA	NA	NA	NA	NA	NA	NA
TAF1	0.94	<2.2e-16	0.95	<2.2e-16	0.94	<2.2e-16	0.96	<2.2e-16	0.94	<2.2e-16	0.95	<2.2e-16	0.91	<2.2e-16	0.92	<2.2e-16	0.92	<2.2e-16	0.94	<2.2e-16	0.92	<2.2e-16	0.94	<2.2e-16	0.96	<2.2e-16	0.95	<2.2e-16	0.95	<2.2e-16	0.96	<2.2e-16	0.95	<2.2e-16	0.95	<2.2e-16	NA	NA	NA	NA	NA	NA	NA	NA	NA	NA	NA	NA	NA
TAF7	0.87	<2.2e-16	0.88	<2.2e-16	0.87	<2.2e-16	0.85	<2.2e-16	0.79	<2.2e-16	0.84	<2.2e-16	NA	NA	NA	NA	NA	NA	NA	NA	NA	NA	NA	NA	0.9	<2.2e-16	0.9	<2.2e-16	0.87	<2.2e-16	0.86	<2.2e-16	0.79	<2.2e-16	0.86	<2.2e-16	NA	NA	NA	NA	NA	NA	NA	NA	NA	NA	NA	NA	NA
TAL1	0.94	<2.2e-16	0.94	<2.2e-16	0.94	<2.2e-16	0.94	<2.2e-16	0.91	<2.2e-16	0.94	<2.2e-16	NA	NA	NA	NA	NA	NA	NA	NA	NA	NA	NA	NA	NA	NA	NA	NA	NA	NA	NA	NA	NA	NA	NA	NA	NA	NA	NA	NA	NA	NA	NA	NA	NA	NA	NA	NA	NA
TBL1XR1-TBLR1	0.98	<2.2e-16	0.98	<2.2e-16	0.98	<2.2e-16	0.98	<2.2e-16	0.97	<2.2e-16	0.98	<2.2e-16	0.98	<2.2e-16	0.98	<2.2e-16	0.97	<2.2e-16	0.98	<2.2e-16	0.97	<2.2e-16	0.97	<2.2e-16	NA	NA	NA	NA	NA	NA	NA	NA	NA	NA	NA	NA	NA	NA	NA	NA	NA	NA	NA	NA	NA	NA	NA	NA	NA
TBP	0.94	<2.2e-16	0.95	<2.2e-16	0.96	<2.2e-16	0.95	<2.2e-16	0.96	<2.2e-16	0.96	<2.2e-16	0.93	<2.2e-16	0.94	<2.2e-16	0.95	<2.2e-16	0.93	<2.2e-16	0.93	<2.2e-16	0.93	<2.2e-16	0.93	<2.2e-16	0.95	<2.2e-16	0.96	<2.2e-16	0.93	<2.2e-16	0.93	<2.2e-16	0.93	<2.2e-16	NA	NA	NA	NA	NA	NA	NA	NA	NA	NA	NA	NA	NA
TCF12	NA	NA	NA	NA	NA	NA	NA	NA	NA	NA	NA	NA	0.9	<2.2e-16	0.91	<2.2e-16	0.91	<2.2e-16	0.94	<2.2e-16	0.91	<2.2e-16	0.93	<2.2e-16	0.69	<2.2e-16	0.77	<2.2e-16	0.76	<2.2e-16	0.74	<2.2e-16	0.7	<2.2e-16	0.74	<2.2e-16	NA	NA	NA	NA	NA	NA	NA	NA	NA	NA	NA	NA	NA
TCF3	NA	NA	NA	NA	NA	NA	NA	NA	NA	NA	NA	NA	0.91	<2.2e-16	0.92	<2.2e-16	0.91	<2.2e-16	0.92	<2.2e-16	0.87	<2.2e-16	0.91	<2.2e-16	NA	NA	NA	NA	NA	NA	NA	NA	NA	NA	NA	NA	NA	NA	NA	NA	NA	NA	NA	NA	NA	NA	NA	NA	NA
TEAD4	0.94	<2.2e-16	0.94	<2.2e-16	0.94	<2.2e-16	0.94	<2.2e-16	0.92	<2.2e-16	0.94	<2.2e-16	NA	NA	NA	NA	NA	NA	NA	NA	NA	NA	NA	NA	0.88	<2.2e-16	0.93	<2.2e-16	0.92	<2.2e-16	0.91	<2.2e-16	0.9	<2.2e-16	0.91	<2.2e-16	NA	NA	NA	NA	NA	NA	NA	NA	NA	NA	NA	NA	NA
THAP1	0.59	<2.2e-16	0.66	<2.2e-16	0.82	<2.2e-16	0.81	<2.2e-16	0.73	<2.2e-16	0.79	<2.2e-16	NA	NA	NA	NA	NA	NA	NA	NA	NA	NA	NA	NA	NA	NA	NA	NA	NA	NA	NA	NA	NA	NA	NA	NA	NA	NA	NA	NA	NA	NA	NA	NA	NA	NA	NA	NA	NA
TR4-NR2C2	0.77	<2.2e-16	0.87	<2.2e-16	0.83	<2.2e-16	0.84	<2.2e-16	0.78	<2.2e-16	0.84	<2.2e-16	0.71	<2.2e-16	0.87	<2.2e-16	0.87	<2.2e-16	0.87	<2.2e-16	0.84	<2.2e-16	0.88	<2.2e-16	NA	NA	NA	NA	NA	NA	NA	NA	NA	NA	NA	NA	NA	NA	NA	NA	NA	NA	NA	NA	NA	NA	NA	NA	NA
TRIM28	0.98	<2.2e-16	0.97	<2.2e-16	0.96	<2.2e-16	0.97	<2.2e-16	0.96	<2.2e-16	0.96	<2.2e-16	NA	NA	NA	NA	NA	NA	NA	NA	NA	NA	NA	NA	NA	NA	NA	NA	NA	NA	NA	NA	NA	NA	NA	NA	NA	NA	NA	NA	NA	NA	NA	NA	NA	NA	NA	NA	NA
UBTF	0.93	<2.2e-16	0.94	<2.2e-16	0.95	<2.2e-16	0.94	<2.2e-16	0.94	<2.2e-16	0.95	<2.2e-16	NA	NA	NA	NA	NA	NA	NA	NA	NA	NA	NA	NA	NA	NA	NA	NA	NA	NA	NA	NA	NA	NA	NA	NA	NA	NA	NA	NA	NA	NA	NA	NA	NA	NA	NA	NA	NA
USF1	0.91	<2.2e-16	0.77	<2.2e-16	0.75	<2.2e-16	0.78	<2.2e-16	0.64	<2.2e-16	0.73	<2.2e-16	0.91	<2.2e-16	0.88	<2.2e-16	0.85	<2.2e-16	0.9	<2.2e-16	0.86	<2.2e-16	0.87	<2.2e-16	0.97	<2.2e-16	0.87	<2.2e-16	0.83	<2.2e-16	0.88	<2.2e-16	0.63	<2.2e-16	0.77	<2.2e-16	NA	NA	NA	NA	NA	NA	NA	NA	NA	NA	NA	NA	NA
USF2	0.96	<2.2e-16	0.95	<2.2e-16	0.94	<2.2e-16	0.95	<2.2e-16	0.91	<2.2e-16	0.94	<2.2e-16	0.96	<2.2e-16	0.95	<2.2e-16	0.94	<2.2e-16	0.95	<2.2e-16	0.93	<2.2e-16	0.94	<2.2e-16	0.98	<2.2e-16	0.96	<2.2e-16	0.96	<2.2e-16	0.96	<2.2e-16	0.93	<2.2e-16	0.95	<2.2e-16	NA	NA	NA	NA	NA	NA	NA	NA	NA	NA	NA	NA	NA
WHIP	NA	NA	NA	NA	NA	NA	NA	NA	NA	NA	NA	NA	0.97	<2.2e-16	0.96	<2.2e-16	0.95	<2.2e-16	0.96	<2.2e-16	0.94	<2.2e-16	0.95	<2.2e-16	NA	NA	NA	NA	NA	NA	NA	NA	NA	NA	NA	NA	NA	NA	NA	NA	NA	NA	NA	NA	NA	NA	NA	NA	NA
WHSC1-NSD2	0.95	<2.2e-16	0.96	<2.2e-16	0.96	<2.2e-16	0.95	<2.2e-16	0.93	<2.2e-16	0.95	<2.2e-16	NA	NA	NA	NA	NA	NA	NA	NA	NA	NA	NA	NA	NA	NA	NA	NA	NA	NA	NA	NA	NA	NA	NA	NA	NA	NA	NA	NA	NA	NA	NA	NA	NA	NA	NA	NA	NA
XRCC4	0.91	<2.2e-16	0.91	<2.2e-16	0.87	<2.2e-16	0.89	<2.2e-16	0.83	<2.2e-16	0.88	<2.2e-16	NA	NA	NA	NA	NA	NA	NA	NA	NA	NA	NA	NA	NA	NA	NA	NA	NA	NA	NA	NA	NA	NA	NA	NA	NA	NA	NA	NA	NA	NA	NA	NA	NA	NA	NA	NA	NA
YY1	0.8	<2.2e-16	0.82	<2.2e-16	0.86	<2.2e-16	0.84	<2.2e-16	0.86	<2.2e-16	0.86	<2.2e-16	0.79	<2.2e-16	0.86	<2.2e-16	0.84	<2.2e-16	0.84	<2.2e-16	0.77	<2.2e-16	0.83	<2.2e-16	0.66	<2.2e-16	0.72	<2.2e-16	0.79	<2.2e-16	0.78	<2.2e-16	0.81	<2.2e-16	0.79	<2.2e-16	NA	NA	NA	NA	NA	NA	NA	NA	NA	NA	NA	NA	NA
ZBTB33	0.9	<2.2e-16	0.79	<2.2e-16	0.73	<2.2e-16	0.84	<2.2e-16	0.76	<2.2e-16	0.8	<2.2e-16	0.93	<2.2e-16	0.86	<2.2e-16	0.79	<2.2e-16	0.87	<2.2e-16	0.85	<2.2e-16	0.85	<2.2e-16	NA	NA	NA	NA	NA	NA	NA	NA	NA	NA	NA	NA	NA	NA	NA	NA	NA	NA	NA	NA	NA	NA	NA	NA	NA
ZBTB7A	0.88	<2.2e-16	0.91	<2.2e-16	0.91	<2.2e-16	0.92	<2.2e-16	0.89	<2.2e-16	0.91	<2.2e-16	NA	NA	NA	NA	NA	NA	NA	NA	NA	NA	NA	NA	NA	NA	NA	NA	NA	NA	NA	NA	NA	NA	NA	NA	NA	NA	NA	NA	NA	NA	NA	NA	NA	NA	NA	NA	NA
ZC3H11A	0.98	<2.2e-16	0.98	<2.2e-16	0.97	<2.2e-16	0.97	<2.2e-16	0.96	<2.2e-16	0.97	<2.2e-16	NA	NA	NA	NA	NA	NA	NA	NA	NA	NA	NA	NA	NA	NA	NA	NA	NA	NA	NA	NA	NA	NA	NA	NA	NA	NA	NA	NA	NA	NA	NA	NA	NA	NA	NA	NA	NA
ZEB1	NA	NA	NA	NA	NA	NA	NA	NA	NA	NA	NA	NA	0.7	<2.2e-16	0.83	<2.2e-16	0.83	<2.2e-16	0.83	<2.2e-16	0.76	<2.2e-16	0.81	<2.2e-16	NA	NA	NA	NA	NA	NA	NA	NA	NA	NA	NA	NA	NA	NA	NA	NA	NA	NA	NA	NA	NA	NA	NA	NA	NA
ZMIZ1	0.99	<2.2e-16	0.98	<2.2e-16	0.98	<2.2e-16	0.98	<2.2e-16	0.97	<2.2e-16	0.98	<2.2e-16	NA	NA	NA	NA	NA	NA	NA	NA	NA	NA	NA	NA	NA	NA	NA	NA	NA	NA	NA	NA	NA	NA	NA	NA	NA	NA	NA	NA	NA	NA	NA	NA	NA	NA	NA	NA	NA
ZNF143	0.93	<2.2e-16	0.92	<2.2e-16	0.94	<2.2e-16	0.93	<2.2e-16	0.94	<2.2e-16	0.94	<2.2e-16	0.92	<2.2e-16	0.88	<2.2e-16	0.91	<2.2e-16	0.88	<2.2e-16	0.9	<2.2e-16	0.92	<2.2e-16	0.94	<2.2e-16	0.92	<2.2e-16	0.93	<2.2e-16	0.91	<2.2e-16	0.91	<2.2e-16	0.91	<2.2e-16	NA	NA	NA	NA	NA	NA	NA	NA	NA	NA	NA	NA	NA
ZNF263	0.81	<2.2e-16	0.92	<2.2e-16	0.91	<2.2e-16	0.9	<2.2e-16	0.87	<2.2e-16	0.9	<2.2e-16	NA	NA	NA	NA	NA	NA	NA	NA	NA	NA	NA	NA	NA	NA	NA	NA	NA	NA	NA	NA	NA	NA	NA	NA	NA	NA	NA	NA	NA	NA	NA	NA	NA	NA	NA	NA	NA
ZNF274	0.84	<2.2e-16	0.89	<2.2e-16	0.85	<2.2e-16	0.85	<2.2e-16	0.8	<2.2e-16	0.86	<2.2e-16	0.77	<2.2e-16	0.81	<2.2e-16	0.78	<2.2e-16	0.76	<2.2e-16	0.73	<2.2e-16	0.76	<2.2e-16	0.67	<2.2e-16	0.69	<2.2e-16	0.7	<2.2e-16	0.75	<2.2e-16	0.68	<2.2e-16	0.75	<2.2e-16	NA	NA	NA	NA	NA	NA	NA	NA	NA	NA	NA	NA	NA
ZNF384	0.78	<2.2e-16	0.9	<2.2e-16	0.86	<2.2e-16	0.88	<2.2e-16	0.9	<2.2e-16	0.9	<2.2e-16	0.75	<2.2e-16	0.88	<2.2e-16	0.85	<2.2e-16	0.85	<2.2e-16	0.88	<2.2e-16	0.87	<2.2e-16	NA	NA	NA	NA	NA	NA	NA	NA	NA	NA	NA	NA	NA	NA	NA	NA	NA	NA	NA	NA	NA	NA	NA	NA	NA
ZZZ3	NA	NA	NA	NA	NA	NA	NA	NA	NA	NA	NA	NA	0.8	<2.2e-16	0.87	<2.2e-16	0.83	<2.2e-16	0.83	<2.2e-16	0.78	<2.2e-16	0.82	<2.2e-16	NA	NA	NA	NA	NA	NA	NA	NA	NA	NA	NA	NA	NA	NA	NA	NA	NA	NA	NA	NA	NA	NA	NA	NA	NA
[truncated: 11 more columns]

## Sheet: Table C
	Pearson's r/TSS/protein_coding/K562	p values/TSS/protein_coding/K562	Pearson's r/Transcript/protein_coding/K562	p values/Transcript/protein_coding/K562	Pearson's r/TTS/protein_coding/K562	p values/TTS/protein_coding/K562	Pearson's r/TSS/lincRNA/K562	p values/TSS/lincRNA/K562	Pearson's r/Transcript/lincRNA/K562	p values/Transcript/lincRNA/K562	Pearson's r/TTS/lincRNA/K562	p values/TTS/lincRNA/K562	Pearson's r/TSS/protein_coding/GM12878	p values/TSS/protein_coding/GM12878	Pearson's r/Transcript/protein_coding/GM12878	p values/Transcript/protein_coding/GM12878	Pearson's r/TTS/protein_coding/GM12878	p values/TTS/protein_coding/GM12878	Pearson's r/TSS/lincRNA/GM12878	p values/TSS/lincRNA/GM12878	Pearson's r/Transcript/lincRNA/GM12878	p values/Transcript/lincRNA/GM12878	Pearson's r/TTS/lincRNA/GM12878	p values/TTS/lincRNA/GM12878	Pearson's r/TSS/protein_coding/H1	p values/TSS/protein_coding/H1	Pearson's r/Transcript/protein_coding/H1	p values/Transcript/protein_coding/H1	Pearson's r/TTS/protein_coding/H1	p values/TTS/protein_coding/H1	Pearson's r/TSS/lincRNA/H1	p values/TSS/lincRNA/H1	Pearson's r/Transcript/lincRNA/H1	p values/Transcript/lincRNA/H1	Pearson's r/TTS/lincRNA/H1	p values/TTS/lincRNA/H1	Pearson's r/TSS/protein_coding/IMR90	p values/TSS/protein_coding/IMR90	Pearson's r/Transcript/protein_coding/IMR90	p values/Transcript/protein_coding/IMR90	Pearson's r/TTS/protein_coding/IMR90	p values/TTS/protein_coding/IMR90	Pearson's r/TSS/lincRNA/IMR90	p values/TSS/lincRNA/IMR90	Pearson's r/Transcript/lincRNA/IMR90	p values/Transcript/lincRNA/IMR90	Pearson's r/TTS/lincRNA/IMR90	p values/TTS/lincRNA/IMR90	Pearson's r/TSS/protein_coding/H9
ARID3A	0.97	<2.2e-16	0.97	<2.2e-16	0.94	<2.2e-16	0.96	<2.2e-16	0.94	<2.2e-16	0.95	<2.2e-16	NA	NA	NA	NA	NA	NA	NA	NA	NA	NA	NA	NA	NA	NA	NA	NA	NA	NA	NA	NA	NA	NA	NA	NA	NA	NA	NA	NA	NA	NA	NA	NA	NA	NA	NA	NA	NA
ATF1	0.96	<2.2e-16	0.94	<2.2e-16	0.92	<2.2e-16	0.94	<2.2e-16	0.91	<2.2e-16	0.93	<2.2e-16	NA	NA	NA	NA	NA	NA	NA	NA	NA	NA	NA	NA	NA	NA	NA	NA	NA	NA	NA	NA	NA	NA	NA	NA	NA	NA	NA	NA	NA	NA	NA	NA	NA	NA	NA	NA	NA
ATF2	NA	NA	NA	NA	NA	NA	NA	NA	NA	NA	NA	NA	0.94	<2.2e-16	0.95	<2.2e-16	0.94	<2.2e-16	0.95	<2.2e-16	0.92	<2.2e-16	0.94	<2.2e-16	0.89	<2.2e-16	0.9	<2.2e-16	0.91	<2.2e-16	0.89	<2.2e-16	0.83	<2.2e-16	0.88	<2.2e-16	NA	NA	NA	NA	NA	NA	NA	NA	NA	NA	NA	NA	NA
ATF3	0.89	<2.2e-16	0.88	<2.2e-16	0.83	<2.2e-16	0.88	<2.2e-16	0.79	<2.2e-16	0.82	<2.2e-16	0.81	<2.2e-16	0.75	<2.2e-16	0.6	<2.2e-16	0.68	<2.2e-16	0.56	<2.2e-16	0.59	<2.2e-16	0.74	<2.2e-16	0.65	<2.2e-16	0.5	<2.2e-16	0.48	<2.2e-16	0.43	<2.2e-16	0.4	<2.2e-16	NA	NA	NA	NA	NA	NA	NA	NA	NA	NA	NA	NA	NA
BACH1	0.95	<2.2e-16	0.96	<2.2e-16	0.93	<2.2e-16	0.95	<2.2e-16	0.92	<2.2e-16	0.94	<2.2e-16	NA	NA	NA	NA	NA	NA	NA	NA	NA	NA	NA	NA	0.9	<2.2e-16	0.92	<2.2e-16	0.9	<2.2e-16	0.92	<2.2e-16	0.89	<2.2e-16	0.91	<2.2e-16	NA	NA	NA	NA	NA	NA	NA	NA	NA	NA	NA	NA	NA
BATF	NA	NA	NA	NA	NA	NA	NA	NA	NA	NA	NA	NA	0.68	<2.2e-16	0.78	<2.2e-16	0.71	<2.2e-16	0.79	<2.2e-16	0.79	<2.2e-16	0.78	<2.2e-16	NA	NA	NA	NA	NA	NA	NA	NA	NA	NA	NA	NA	NA	NA	NA	NA	NA	NA	NA	NA	NA	NA	NA	NA	NA
BCL11A	NA	NA	NA	NA	NA	NA	NA	NA	NA	NA	NA	NA	0.88	<2.2e-16	0.9	<2.2e-16	0.88	<2.2e-16	0.92	<2.2e-16	0.88	<2.2e-16	0.89	<2.2e-16	0.47	<2.2e-16	0.5	<2.2e-16	0.42	<2.2e-16	0.43	<2.2e-16	0.41	<2.2e-16	0.37	<2.2e-16	NA	NA	NA	NA	NA	NA	NA	NA	NA	NA	NA	NA	NA
BCL3	NA	NA	NA	NA	NA	NA	NA	NA	NA	NA	NA	NA	0.76	<2.2e-16	0.78	<2.2e-16	0.78	<2.2e-16	0.72	<2.2e-16	0.6	<2.2e-16	0.64	<2.2e-16	NA	NA	NA	NA	NA	NA	NA	NA	NA	NA	NA	NA	NA	NA	NA	NA	NA	NA	NA	NA	NA	NA	NA	NA	NA
BCLAF1	0.87	<2.2e-16	0.86	<2.2e-16	0.76	<2.2e-16	0.8	<2.2e-16	0.67	<2.2e-16	0.64	<2.2e-16	0.94	<2.2e-16	0.95	<2.2e-16	0.95	<2.2e-16	0.96	<2.2e-16	0.91	<2.2e-16	0.94	<2.2e-16	NA	NA	NA	NA	NA	NA	NA	NA	NA	NA	NA	NA	NA	NA	NA	NA	NA	NA	NA	NA	NA	NA	NA	NA	NA
BDP1	0.95	<2.2e-16	0.95	<2.2e-16	0.91	<2.2e-16	0.93	<2.2e-16	0.89	<2.2e-16	0.91	<2.2e-16	NA	NA	NA	NA	NA	NA	NA	NA	NA	NA	NA	NA	NA	NA	NA	NA	NA	NA	NA	NA	NA	NA	NA	NA	NA	NA	NA	NA	NA	NA	NA	NA	NA	NA	NA	NA	NA
BHLHE40	0.9	<2.2e-16	0.95	<2.2e-16	0.96	<2.2e-16	0.96	<2.2e-16	0.95	<2.2e-16	0.96	<2.2e-16	0.89	<2.2e-16	0.94	<2.2e-16	0.95	<2.2e-16	0.96	<2.2e-16	0.94	<2.2e-16	0.95	<2.2e-16	NA	NA	NA	NA	NA	NA	NA	NA	NA	NA	NA	NA	NA	NA	NA	NA	NA	NA	NA	NA	NA	NA	NA	NA	NA
BRCA1	NA	NA	NA	NA	NA	NA	NA	NA	NA	NA	NA	NA	0.96	<2.2e-16	0.94	<2.2e-16	0.91	<2.2e-16	0.93	<2.2e-16	0.89	<2.2e-16	0.91	<2.2e-16	0.94	<2.2e-16	0.94	<2.2e-16	0.91	<2.2e-16	0.94	<2.2e-16	0.9	<2.2e-16	0.92	<2.2e-16	NA	NA	NA	NA	NA	NA	NA	NA	NA	NA	NA	NA	NA
BRF1	0.89	<2.2e-16	0.91	<2.2e-16	0.84	<2.2e-16	0.87	<2.2e-16	0.82	<2.2e-16	0.85	<2.2e-16	NA	NA	NA	NA	NA	NA	NA	NA	NA	NA	NA	NA	NA	NA	NA	NA	NA	NA	NA	NA	NA	NA	NA	NA	NA	NA	NA	NA	NA	NA	NA	NA	NA	NA	NA	NA	NA
BRF2	0.95	<2.2e-16	0.95	<2.2e-16	0.92	<2.2e-16	0.94	<2.2e-16	0.9	<2.2e-16	0.92	<2.2e-16	NA	NA	NA	NA	NA	NA	NA	NA	NA	NA	NA	NA	NA	NA	NA	NA	NA	NA	NA	NA	NA	NA	NA	NA	NA	NA	NA	NA	NA	NA	NA	NA	NA	NA	NA	NA	NA
CBX2	0.91	<2.2e-16	0.93	<2.2e-16	0.89	<2.2e-16	0.92	<2.2e-16	0.88	<2.2e-16	0.92	<2.2e-16	NA	NA	NA	NA	NA	NA	NA	NA	NA	NA	NA	NA	NA	NA	NA	NA	NA	NA	NA	NA	NA	NA	NA	NA	NA	NA	NA	NA	NA	NA	NA	NA	NA	NA	NA	NA	NA
CBX3	0.96	<2.2e-16	0.95	<2.2e-16	0.94	<2.2e-16	0.95	<2.2e-16	0.93	<2.2e-16	0.94	<2.2e-16	NA	NA	NA	NA	NA	NA	NA	NA	NA	NA	NA	NA	NA	NA	NA	NA	NA	NA	NA	NA	NA	NA	NA	NA	NA	NA	NA	NA	NA	NA	NA	NA	NA	NA	NA	NA	NA
CBX8	0.9	<2.2e-16	0.92	<2.2e-16	0.87	<2.2e-16	0.91	<2.2e-16	0.86	<2.2e-16	0.91	<2.2e-16	NA	NA	NA	NA	NA	NA	NA	NA	NA	NA	NA	NA	NA	NA	NA	NA	NA	NA	NA	NA	NA	NA	NA	NA	NA	NA	NA	NA	NA	NA	NA	NA	NA	NA	NA	NA	NA
CCNT2	0.98	<2.2e-16	0.97	<2.2e-16	0.96	<2.2e-16	0.97	<2.2e-16	0.91	<2.2e-16	0.94	<2.2e-16	NA	NA	NA	NA	NA	NA	NA	NA	NA	NA	NA	NA	NA	NA	NA	NA	NA	NA	NA	NA	NA	NA	NA	NA	NA	NA	NA	NA	NA	NA	NA	NA	NA	NA	NA	NA	NA
CEBPB	0.85	<2.2e-16	0.84	<2.2e-16	0.82	<2.2e-16	0.87	<2.2e-16	0.84	<2.2e-16	0.84	<2.2e-16	0.97	<2.2e-16	0.96	<2.2e-16	0.95	<2.2e-16	0.96	<2.2e-16	0.93	<2.2e-16	0.94	<2.2e-16	0.85	<2.2e-16	0.89	<2.2e-16	0.85	<2.2e-16	0.89	<2.2e-16	0.86	<2.2e-16	0.86	<2.2e-16	0.72	<2.2e-16	0.81	<2.2e-16	0.76	<2.2e-16	0.81	<2.2e-16	0.81	<2.2e-16	0.82	<2.2e-16	NA
CEBPD	0.98	<2.2e-16	0.98	<2.2e-16	0.97	<2.2e-16	0.97	<2.2e-16	0.95	<2.2e-16	0.96	<2.2e-16	NA	NA	NA	NA	NA	NA	NA	NA	NA	NA	NA	NA	NA	NA	NA	NA	NA	NA	NA	NA	NA	NA	NA	NA	NA	NA	NA	NA	NA	NA	NA	NA	NA	NA	NA	NA	NA
CHD1	0.97	<2.2e-16	0.96	<2.2e-16	0.94	<2.2e-16	0.96	<2.2e-16	0.89	<2.2e-16	0.91	<2.2e-16	0.97	<2.2e-16	0.97	<2.2e-16	0.95	<2.2e-16	0.97	<2.2e-16	0.92	<2.2e-16	0.94	<2.2e-16	0.94	<2.2e-16	0.94	<2.2e-16	0.9	<2.2e-16	0.93	<2.2e-16	0.87	<2.2e-16	0.9	<2.2e-16	NA	NA	NA	NA	NA	NA	NA	NA	NA	NA	NA	NA	NA
CHD2	0.92	<2.2e-16	0.94	<2.2e-16	0.96	<2.2e-16	0.95	<2.2e-16	0.94	<2.2e-16	0.96	<2.2e-16	0.95	<2.2e-16	0.96	<2.2e-16	0.97	<2.2e-16	0.97	<2.2e-16	0.94	<2.2e-16	0.96	<2.2e-16	0.92	<2.2e-16	0.95	<2.2e-16	0.95	<2.2e-16	0.96	<2.2e-16	0.93	<2.2e-16	0.95	<2.2e-16	NA	NA	NA	NA	NA	NA	NA	NA	NA	NA	NA	NA	NA
CHD4	0.88	<2.2e-16	0.87	<2.2e-16	0.8	<2.2e-16	0.87	<2.2e-16	0.79	<2.2e-16	0.83	<2.2e-16	NA	NA	NA	NA	NA	NA	NA	NA	NA	NA	NA	NA	NA	NA	NA	NA	NA	NA	NA	NA	NA	NA	NA	NA	NA	NA	NA	NA	NA	NA	NA	NA	NA	NA	NA	NA	NA
CHD7	0.93	<2.2e-16	0.95	<2.2e-16	0.94	<2.2e-16	0.93	<2.2e-16	0.89	<2.2e-16	0.91	<2.2e-16	NA	NA	NA	NA	NA	NA	NA	NA	NA	NA	NA	NA	0.9	<2.2e-16	0.92	<2.2e-16	0.89	<2.2e-16	0.91	<2.2e-16	0.86	<2.2e-16	0.87	<2.2e-16	NA	NA	NA	NA	NA	NA	NA	NA	NA	NA	NA	NA	NA
COREST-RCOR1	0.98	<2.2e-16	0.98	<2.2e-16	0.97	<2.2e-16	0.98	<2.2e-16	0.95	<2.2e-16	0.97	<2.2e-16	0.98	<2.2e-16	0.97	<2.2e-16	0.96	<2.2e-16	0.98	<2.2e-16	0.94	<2.2e-16	0.95	<2.2e-16	NA	NA	NA	NA	NA	NA	NA	NA	NA	NA	NA	NA	0.94	<2.2e-16	0.95	<2.2e-16	0.93	<2.2e-16	0.96	<2.2e-16	0.93	<2.2e-16	0.95	<2.2e-16	NA
CREB1	0.96	<2.2e-16	0.94	<2.2e-16	0.93	<2.2e-16	0.95	<2.2e-16	0.9	<2.2e-16	0.93	<2.2e-16	0.92	<2.2e-16	0.95	<2.2e-16	0.97	<2.2e-16	0.97	<2.2e-16	0.95	<2.2e-16	0.96	<2.2e-16	0.85	<2.2e-16	0.91	<2.2e-16	0.95	<2.2e-16	0.95	<2.2e-16	0.91	<2.2e-16	0.94	<2.2e-16	NA	NA	NA	NA	NA	NA	NA	NA	NA	NA	NA	NA	NA
CREBBP	0.79	<2.2e-16	0.85	<2.2e-16	0.78	<2.2e-16	0.76	<2.2e-16	0.73	<2.2e-16	0.74	<2.2e-16	NA	NA	NA	NA	NA	NA	NA	NA	NA	NA	NA	NA	NA	NA	NA	NA	NA	NA	NA	NA	NA	NA	NA	NA	NA	NA	NA	NA	NA	NA	NA	NA	NA	NA	NA	NA	NA
CTBP2	NA	NA	NA	NA	NA	NA	NA	NA	NA	NA	NA	NA	NA	NA	NA	NA	NA	NA	NA	NA	NA	NA	NA	NA	0.94	<2.2e-16	0.96	<2.2e-16	0.94	<2.2e-16	0.95	<2.2e-16	0.92	<2.2e-16	0.93	<2.2e-16	NA	NA	NA	NA	NA	NA	NA	NA	NA	NA	NA	NA	NA
CTCF	0.89	<2.2e-16	0.88	<2.2e-16	0.92	<2.2e-16	0.89	<2.2e-16	0.81	<2.2e-16	0.86	<2.2e-16	0.87	<2.2e-16	0.89	<2.2e-16	0.95	<2.2e-16	0.93	<2.2e-16	0.89	<2.2e-16	0.92	<2.2e-16	0.82	<2.2e-16	0.86	<2.2e-16	0.9	<2.2e-16	0.88	<2.2e-16	0.83	<2.2e-16	0.88	<2.2e-16	0.83	<2.2e-16	0.89	<2.2e-16	0.93	<2.2e-16	0.91	<2.2e-16	0.89	<2.2e-16	0.9	<2.2e-16	NA
CTCFL	0.82	<2.2e-16	0.84	<2.2e-16	0.78	<2.2e-16	0.78	<2.2e-16	0.64	<2.2e-16	0.7	<2.2e-16	NA	NA	NA	NA	NA	NA	NA	NA	NA	NA	NA	NA	NA	NA	NA	NA	NA	NA	NA	NA	NA	NA	NA	NA	NA	NA	NA	NA	NA	NA	NA	NA	NA	NA	NA	NA	NA
CUX1	0.97	<2.2e-16	0.97	<2.2e-16	0.96	<2.2e-16	0.97	<2.2e-16	0.95	<2.2e-16	0.96	<2.2e-16	0.96	<2.2e-16	0.96	<2.2e-16	0.93	<2.2e-16	0.95	<2.2e-16	0.91	<2.2e-16	0.93	<2.2e-16	NA	NA	NA	NA	NA	NA	NA	NA	NA	NA	NA	NA	NA	NA	NA	NA	NA	NA	NA	NA	NA	NA	NA	NA	NA
DNA METHYLATION	NA	NA	NA	NA	NA	NA	NA	NA	NA	NA	NA	NA	NA	NA	NA	NA	NA	NA	NA	NA	NA	NA	NA	NA	0.9	<2.2e-16	0.87	<2.2e-16	0.88	<2.2e-16	0.9	<2.2e-16	0.85	<2.2e-16	0.87	<2.2e-16	0.79	<2.2e-16	0.79	<2.2e-16	0.8	<2.2e-16	0.79	<2.2e-16	0.73	<2.2e-16	0.77	<2.2e-16	0.88
DNASE HYPERSENSITIVITY	0.95	<2.2e-16	0.96	<2.2e-16	0.96	<2.2e-16	0.96	<2.2e-16	0.94	<2.2e-16	0.96	<2.2e-16	0.96	<2.2e-16	0.97	<2.2e-16	0.96	<2.2e-16	0.97	<2.2e-16	0.93	<2.2e-16	0.95	<2.2e-16	0.93	<2.2e-16	0.96	<2.2e-16	0.97	<2.2e-16	0.97	<2.2e-16	0.96	<2.2e-16	0.96	<2.2e-16	0.88	<2.2e-16	0.92	<2.2e-16	0.92	<2.2e-16	0.93	<2.2e-16	0.9	<2.2e-16	0.92	<2.2e-16	0.89
E2F4	0.94	<2.2e-16	0.96	<2.2e-16	0.95	<2.2e-16	0.96	<2.2e-16	0.91	<2.2e-16	0.93	<2.2e-16	0.92	<2.2e-16	0.92	<2.2e-16	0.89	<2.2e-16	0.93	<2.2e-16	0.86	<2.2e-16	0.88	<2.2e-16	NA	NA	NA	NA	NA	NA	NA	NA	NA	NA	NA	NA	NA	NA	NA	NA	NA	NA	NA	NA	NA	NA	NA	NA	NA
E2F6	0.92	<2.2e-16	0.93	<2.2e-16	0.95	<2.2e-16	0.95	<2.2e-16	0.91	<2.2e-16	0.94	<2.2e-16	NA	NA	NA	NA	NA	NA	NA	NA	NA	NA	NA	NA	0.93	<2.2e-16	0.96	<2.2e-16	0.96	<2.2e-16	0.96	<2.2e-16	0.93	<2.2e-16	0.95	<2.2e-16	NA	NA	NA	NA	NA	NA	NA	NA	NA	NA	NA	NA	NA
EBF1	NA	NA	NA	NA	NA	NA	NA	NA	NA	NA	NA	NA	0.69	<2.2e-16	0.78	<2.2e-16	0.8	<2.2e-16	0.82	<2.2e-16	0.79	<2.2e-16	0.81	<2.2e-16	NA	NA	NA	NA	NA	NA	NA	NA	NA	NA	NA	NA	NA	NA	NA	NA	NA	NA	NA	NA	NA	NA	NA	NA	NA
EGFP-HDAC8	0.91	<2.2e-16	0.94	<2.2e-16	0.89	<2.2e-16	0.88	<2.2e-16	0.83	<2.2e-16	0.82	<2.2e-16	NA	NA	NA	NA	NA	NA	NA	NA	NA	NA	NA	NA	NA	NA	NA	NA	NA	NA	NA	NA	NA	NA	NA	NA	NA	NA	NA	NA	NA	NA	NA	NA	NA	NA	NA	NA	NA
EGFP-JUNB	0.92	<2.2e-16	0.92	<2.2e-16	0.87	<2.2e-16	0.89	<2.2e-16	0.84	<2.2e-16	0.85	<2.2e-16	NA	NA	NA	NA	NA	NA	NA	NA	NA	NA	NA	NA	NA	NA	NA	NA	NA	NA	NA	NA	NA	NA	NA	NA	NA	NA	NA	NA	NA	NA	NA	NA	NA	NA	NA	NA	NA
EGFP-NR4A1	0.76	<2.2e-16	0.9	<2.2e-16	0.86	<2.2e-16	0.79	<2.2e-16	0.76	<2.2e-16	0.78	<2.2e-16	NA	NA	NA	NA	NA	NA	NA	NA	NA	NA	NA	NA	NA	NA	NA	NA	NA	NA	NA	NA	NA	NA	NA	NA	NA	NA	NA	NA	NA	NA	NA	NA	NA	NA	NA	NA	NA
EGR1	0.77	<2.2e-16	0.83	<2.2e-16	0.84	<2.2e-16	0.86	<2.2e-16	0.81	<2.2e-16	0.84	<2.2e-16	0.8	<2.2e-16	0.86	<2.2e-16	0.85	<2.2e-16	0.88	<2.2e-16	0.73	<2.2e-16	0.78	<2.2e-16	0.6	<2.2e-16	0.63	<2.2e-16	0.6	<2.2e-16	0.67	<2.2e-16	0.53	<2.2e-16	0.57	<2.2e-16	NA	NA	NA	NA	NA	NA	NA	NA	NA	NA	NA	NA	NA
ELF1	0.83	<2.2e-16	0.86	<2.2e-16	0.88	<2.2e-16	0.89	<2.2e-16	0.84	<2.2e-16	0.86	<2.2e-16	0.9	<2.2e-16	0.93	<2.2e-16	0.94	<2.2e-16	0.95	<2.2e-16	0.85	<2.2e-16	0.9	<2.2e-16	NA	NA	NA	NA	NA	NA	NA	NA	NA	NA	NA	NA	NA	NA	NA	NA	NA	NA	NA	NA	NA	NA	NA	NA	NA
ELK1	0.97	<2.2e-16	0.97	<2.2e-16	0.95	<2.2e-16	0.96	<2.2e-16	0.93	<2.2e-16	0.95	<2.2e-16	0.96	<2.2e-16	0.96	<2.2e-16	0.94	<2.2e-16	0.96	<2.2e-16	0.91	<2.2e-16	0.93	<2.2e-16	NA	NA	NA	NA	NA	NA	NA	NA	NA	NA	NA	NA	NA	NA	NA	NA	NA	NA	NA	NA	NA	NA	NA	NA	NA
ESRRA	NA	NA	NA	NA	NA	NA	NA	NA	NA	NA	NA	NA	0.97	<2.2e-16	0.96	<2.2e-16	0.93	<2.2e-16	0.96	<2.2e-16	0.91	<2.2e-16	0.93	<2.2e-16	NA	NA	NA	NA	NA	NA	NA	NA	NA	NA	NA	NA	NA	NA	NA	NA	NA	NA	NA	NA	NA	NA	NA	NA	NA
ETS1	0.95	<2.2e-16	0.96	<2.2e-16	0.94	<2.2e-16	0.95	<2.2e-16	0.83	<2.2e-16	0.87	<2.2e-16	0.94	<2.2e-16	0.92	<2.2e-16	0.87	<2.2e-16	0.9	<2.2e-16	0.76	<2.2e-16	0.79	<2.2e-16	NA	NA	NA	NA	NA	NA	NA	NA	NA	NA	NA	NA	NA	NA	NA	NA	NA	NA	NA	NA	NA	NA	NA	NA	NA
EZH2	0.94	<2.2e-16	0.95	<2.2e-16	0.93	<2.2e-16	0.95	<2.2e-16	0.93	<2.2e-16	0.95	<2.2e-16	0.88	<2.2e-16	0.88	<2.2e-16	0.85	<2.2e-16	0.88	<2.2e-16	0.83	<2.2e-16	0.86	<2.2e-16	0.97	<2.2e-16	0.95	<2.2e-16	0.91	<2.2e-16	0.94	<2.2e-16	0.88	<2.2e-16	0.89	<2.2e-16	NA	NA	NA	NA	NA	NA	NA	NA	NA	NA	NA	NA	NA
FAM48A	NA	NA	NA	NA	NA	NA	NA	NA	NA	NA	NA	NA	0.83	<2.2e-16	0.9	<2.2e-16	0.82	<2.2e-16	0.87	<2.2e-16	0.85	<2.2e-16	0.87	<2.2e-16	NA	NA	NA	NA	NA	NA	NA	NA	NA	NA	NA	NA	NA	NA	NA	NA	NA	NA	NA	NA	NA	NA	NA	NA	NA
FOS (AND EGFP-FOS)	0.95	<2.2e-16	0.93	<2.2e-16	0.9	<2.2e-16	0.93	<2.2e-16	0.87	<2.2e-16	0.9	<2.2e-16	0.92	<2.2e-16	0.86	<2.2e-16	0.76	<2.2e-16	0.84	<2.2e-16	0.74	<2.2e-16	0.77	<2.2e-16	NA	NA	NA	NA	NA	NA	NA	NA	NA	NA	NA	NA	NA	NA	NA	NA	NA	NA	NA	NA	NA	NA	NA	NA	NA
FOSL1	0.82	<2.2e-16	0.83	<2.2e-16	0.75	<2.2e-16	0.79	<2.2e-16	0.68	<2.2e-16	0.74	<2.2e-16	NA	NA	NA	NA	NA	NA	NA	NA	NA	NA	NA	NA	0.33	<2.2e-16	0.36	<2.2e-16	0.25	<2.2e-16	0.26	<2.2e-16	0.27	<2.2e-16	0.24	<2.2e-16	NA	NA	NA	NA	NA	NA	NA	NA	NA	NA	NA	NA	NA
FOXM1	NA	NA	NA	NA	NA	NA	NA	NA	NA	NA	NA	NA	0.96	<2.2e-16	0.96	<2.2e-16	0.96	<2.2e-16	0.97	<2.2e-16	0.94	<2.2e-16	0.95	<2.2e-16	NA	NA	NA	NA	NA	NA	NA	NA	NA	NA	NA	NA	NA	NA	NA	NA	NA	NA	NA	NA	NA	NA	NA	NA	NA
GABP	0.79	<2.2e-16	0.76	<2.2e-16	0.78	<2.2e-16	0.8	<2.2e-16	0.7	<2.2e-16	0.69	<2.2e-16	0.8	<2.2e-16	0.79	<2.2e-16	0.87	<2.2e-16	0.88	<2.2e-16	0.86	<2.2e-16	0.88	<2.2e-16	0.68	<2.2e-16	0.79	<2.2e-16	0.87	<2.2e-16	0.84	<2.2e-16	0.82	<2.2e-16	0.85	<2.2e-16	NA	NA	NA	NA	NA	NA	NA	NA	NA	NA	NA	NA	NA
GATA1	0.97	<2.2e-16	0.97	<2.2e-16	0.95	<2.2e-16	0.96	<2.2e-16	0.93	<2.2e-16	0.95	<2.2e-16	NA	NA	NA	NA	NA	NA	NA	NA	NA	NA	NA	NA	NA	NA	NA	NA	NA	NA	NA	NA	NA	NA	NA	NA	NA	NA	NA	NA	NA	NA	NA	NA	NA	NA	NA	NA	NA
GATA2 (AND EGFP-GATA2)	0.86	<2.2e-16	0.88	<2.2e-16	0.82	<2.2e-16	0.88	<2.2e-16	0.85	<2.2e-16	0.86	<2.2e-16	NA	NA	NA	NA	NA	NA	NA	NA	NA	NA	NA	NA	NA	NA	NA	NA	NA	NA	NA	NA	NA	NA	NA	NA	NA	NA	NA	NA	NA	NA	NA	NA	NA	NA	NA	NA	NA
GTF2B	0.96	<2.2e-16	0.94	<2.2e-16	0.88	<2.2e-16	0.93	<2.2e-16	0.85	<2.2e-16	0.89	<2.2e-16	NA	NA	NA	NA	NA	NA	NA	NA	NA	NA	NA	NA	NA	NA	NA	NA	NA	NA	NA	NA	NA	NA	NA	NA	NA	NA	NA	NA	NA	NA	NA	NA	NA	NA	NA	NA	NA
GTF2F1	0.98	<2.2e-16	0.97	<2.2e-16	0.95	<2.2e-16	0.96	<2.2e-16	0.93	<2.2e-16	0.94	<2.2e-16	NA	NA	NA	NA	NA	NA	NA	NA	NA	NA	NA	NA	0.96	<2.2e-16	0.95	<2.2e-16	0.92	<2.2e-16	0.95	<2.2e-16	0.9	<2.2e-16	0.92	<2.2e-16	NA	NA	NA	NA	NA	NA	NA	NA	NA	NA	NA	NA	NA
GTF3C2	0.88	<2.2e-16	0.9	<2.2e-16	0.87	<2.2e-16	0.92	<2.2e-16	0.84	<2.2e-16	0.88	<2.2e-16	NA	NA	NA	NA	NA	NA	NA	NA	NA	NA	NA	NA	NA	NA	NA	NA	NA	NA	NA	NA	NA	NA	NA	NA	NA	NA	NA	NA	NA	NA	NA	NA	NA	NA	NA	NA	NA
H2AK5AC	NA	NA	NA	NA	NA	NA	NA	NA	NA	NA	NA	NA	NA	NA	NA	NA	NA	NA	NA	NA	NA	NA	NA	NA	0.93	<2.2e-16	0.96	<2.2e-16	0.95	<2.2e-16	0.95	<2.2e-16	0.93	<2.2e-16	0.95	<2.2e-16	0.98	<2.2e-16	0.98	<2.2e-16	0.98	<2.2e-16	0.98	<2.2e-16	0.98	<2.2e-16	0.98	<2.2e-16	0.89
H2AK9AC	NA	NA	NA	NA	NA	NA	NA	NA	NA	NA	NA	NA	NA	NA	NA	NA	NA	NA	NA	NA	NA	NA	NA	NA	NA	NA	NA	NA	NA	NA	NA	NA	NA	NA	NA	NA	0.94	<2.2e-16	0.94	<2.2e-16	0.91	<2.2e-16	0.93	<2.2e-16	0.89	<2.2e-16	0.91	<2.2e-16	NA
H2AZ	0.95	<2.2e-16	0.91	<2.2e-16	0.91	<2.2e-16	0.95	<2.2e-16	0.92	<2.2e-16	0.93	<2.2e-16	0.94	<2.2e-16	0.91	<2.2e-16	0.92	<2.2e-16	0.95	<2.2e-16	0.91	<2.2e-16	0.92	<2.2e-16	0.87	<2.2e-16	0.87	<2.2e-16	0.84	<2.2e-16	0.87	<2.2e-16	0.8	<2.2e-16	0.82	<2.2e-16	0.95	<2.2e-16	0.95	<2.2e-16	0.95	<2.2e-16	0.96	<2.2e-16	0.94	<2.2e-16	0.95	<2.2e-16	0.84
H2BK120AC	NA	NA	NA	NA	NA	NA	NA	NA	NA	NA	NA	NA	NA	NA	NA	NA	NA	NA	NA	NA	NA	NA	NA	NA	0.94	<2.2e-16	0.96	<2.2e-16	0.94	<2.2e-16	0.96	<2.2e-16	0.94	<2.2e-16	0.95	<2.2e-16	0.99	<2.2e-16	0.99	<2.2e-16	0.99	<2.2e-16	0.99	<2.2e-16	0.99	<2.2e-16	0.99	<2.2e-16	0.94
H2BK12AC	NA	NA	NA	NA	NA	NA	NA	NA	NA	NA	NA	NA	NA	NA	NA	NA	NA	NA	NA	NA	NA	NA	NA	NA	0.96	<2.2e-16	0.98	<2.2e-16	0.97	<2.2e-16	0.97	<2.2e-16	0.96	<2.2e-16	0.97	<2.2e-16	0.99	<2.2e-16	0.99	<2.2e-16	0.99	<2.2e-16	0.99	<2.2e-16	0.99	<2.2e-16	0.99	<2.2e-16	0.93
H2BK15AC	NA	NA	NA	NA	NA	NA	NA	NA	NA	NA	NA	NA	NA	NA	NA	NA	NA	NA	NA	NA	NA	NA	NA	NA	0.94	<2.2e-16	0.97	<2.2e-16	0.96	<2.2e-16	0.96	<2.2e-16	0.95	<2.2e-16	0.96	<2.2e-16	0.99	<2.2e-16	0.99	<2.2e-16	0.98	<2.2e-16	0.99	<2.2e-16	0.99	<2.2e-16	0.99	<2.2e-16	0.92
H2BK20AC	NA	NA	NA	NA	NA	NA	NA	NA	NA	NA	NA	NA	NA	NA	NA	NA	NA	NA	NA	NA	NA	NA	NA	NA	0.92	<2.2e-16	0.95	<2.2e-16	0.93	<2.2e-16	0.95	<2.2e-16	0.93	<2.2e-16	0.95	<2.2e-16	0.98	<2.2e-16	0.98	<2.2e-16	0.98	<2.2e-16	0.99	<2.2e-16	0.98	<2.2e-16	0.99	<2.2e-16	0.86
H2BK5AC	NA	NA	NA	NA	NA	NA	NA	NA	NA	NA	NA	NA	NA	NA	NA	NA	NA	NA	NA	NA	NA	NA	NA	NA	0.97	<2.2e-16	0.97	<2.2e-16	0.96	<2.2e-16	0.97	<2.2e-16	0.95	<2.2e-16	0.96	<2.2e-16	0.99	<2.2e-16	0.99	<2.2e-16	0.99	<2.2e-16	0.99	<2.2e-16	0.99	<2.2e-16	0.99	<2.2e-16	0.94
H3K14AC	NA	NA	NA	NA	NA	NA	NA	NA	NA	NA	NA	NA	NA	NA	NA	NA	NA	NA	NA	NA	NA	NA	NA	NA	0.94	<2.2e-16	0.95	<2.2e-16	0.93	<2.2e-16	0.95	<2.2e-16	0.93	<2.2e-16	0.94	<2.2e-16	0.99	<2.2e-16	0.99	<2.2e-16	0.98	<2.2e-16	0.99	<2.2e-16	0.98	<2.2e-16	0.99	<2.2e-16	0.97
H3K18AC	NA	NA	NA	NA	NA	NA	NA	NA	NA	NA	NA	NA	NA	NA	NA	NA	NA	NA	NA	NA	NA	NA	NA	NA	0.96	<2.2e-16	0.97	<2.2e-16	0.95	<2.2e-16	0.96	<2.2e-16	0.94	<2.2e-16	0.95	<2.2e-16	0.99	<2.2e-16	0.99	<2.2e-16	0.98	<2.2e-16	0.99	<2.2e-16	0.99	<2.2e-16	0.99	<2.2e-16	0.98
H3K23AC	NA	NA	NA	NA	NA	NA	NA	NA	NA	NA	NA	NA	NA	NA	NA	NA	NA	NA	NA	NA	NA	NA	NA	NA	0.91	<2.2e-16	0.93	<2.2e-16	0.9	<2.2e-16	0.92	<2.2e-16	0.9	<2.2e-16	0.91	<2.2e-16	0.99	<2.2e-16	0.98	<2.2e-16	0.97	<2.2e-16	0.99	<2.2e-16	0.98	<2.2e-16	0.98	<2.2e-16	0.86
H3K23ME2	NA	NA	NA	NA	NA	NA	NA	NA	NA	NA	NA	NA	NA	NA	NA	NA	NA	NA	NA	NA	NA	NA	NA	NA	0.94	<2.2e-16	0.93	<2.2e-16	0.9	<2.2e-16	0.91	<2.2e-16	0.83	<2.2e-16	0.84	<2.2e-16	NA	NA	NA	NA	NA	NA	NA	NA	NA	NA	NA	NA	0.93
H3K27AC	0.98	<2.2e-16	0.98	<2.2e-16	0.97	<2.2e-16	0.98	<2.2e-16	0.96	<2.2e-16	0.97	<2.2e-16	0.96	<2.2e-16	0.96	<2.2e-16	0.94	<2.2e-16	0.95	<2.2e-16	0.93	<2.2e-16	0.94	<2.2e-16	0.96	<2.2e-16	0.95	<2.2e-16	0.92	<2.2e-16	0.94	<2.2e-16	0.87	<2.2e-16	0.88	<2.2e-16	0.99	<2.2e-16	0.99	<2.2e-16	0.99	<2.2e-16	1	<2.2e-16	0.99	<2.2e-16	0.99	<2.2e-16	0.92
H3K27ME3	0.93	<2.2e-16	0.94	<2.2e-16	0.92	<2.2e-16	0.93	<2.2e-16	0.92	<2.2e-16	0.94	<2.2e-16	0.92	<2.2e-16	0.89	<2.2e-16	0.83	<2.2e-16	0.85	<2.2e-16	0.82	<2.2e-16	0.83	<2.2e-16	0.96	<2.2e-16	0.92	<2.2e-16	0.87	<2.2e-16	0.9	<2.2e-16	0.81	<2.2e-16	0.82	<2.2e-16	0.76	<2.2e-16	0.78	<2.2e-16	0.75	<2.2e-16	0.75	<2.2e-16	0.75	<2.2e-16	0.78	<2.2e-16	0.75
H3K36ME3	0.89	<2.2e-16	0.93	<2.2e-16	0.9	<2.2e-16	0.87	<2.2e-16	0.84	<2.2e-16	0.87	<2.2e-16	0.75	<2.2e-16	0.89	<2.2e-16	0.85	<2.2e-16	0.73	<2.2e-16	0.74	<2.2e-16	0.76	<2.2e-16	0.72	<2.2e-16	0.82	<2.2e-16	0.8	<2.2e-16	0.68	<2.2e-16	0.64	<2.2e-16	0.67	<2.2e-16	0.8	<2.2e-16	0.88	<2.2e-16	0.87	<2.2e-16	0.87	<2.2e-16	0.85	<2.2e-16	0.87	<2.2e-16	0.65
H3K4AC	NA	NA	NA	NA	NA	NA	NA	NA	NA	NA	NA	NA	NA	NA	NA	NA	NA	NA	NA	NA	NA	NA	NA	NA	0.94	<2.2e-16	0.96	<2.2e-16	0.95	<2.2e-16	0.95	<2.2e-16	0.93	<2.2e-16	0.94	<2.2e-16	0.99	<2.2e-16	0.99	<2.2e-16	0.99	<2.2e-16	1	<2.2e-16	0.99	<2.2e-16	0.99	<2.2e-16	0.96
H3K4ME1	0.92	<2.2e-16	0.93	<2.2e-16	0.93	<2.2e-16	0.94	<2.2e-16	0.92	<2.2e-16	0.94	<2.2e-16	0.89	<2.2e-16	0.93	<2.2e-16	0.92	<2.2e-16	0.93	<2.2e-16	0.9	<2.2e-16	0.92	<2.2e-16	0.89	<2.2e-16	0.93	<2.2e-16	0.91	<2.2e-16	0.91	<2.2e-16	0.86	<2.2e-16	0.89	<2.2e-16	0.95	<2.2e-16	0.96	<2.2e-16	0.96	<2.2e-16	0.97	<2.2e-16	0.95	<2.2e-16	0.97	<2.2e-16	0.77
H3K4ME2	0.99	<2.2e-16	0.99	<2.2e-16	0.99	<2.2e-16	0.99	<2.2e-16	0.98	<2.2e-16	0.98	<2.2e-16	0.97	<2.2e-16	0.98	<2.2e-16	0.98	<2.2e-16	0.98	<2.2e-16	0.97	<2.2e-16	0.97	<2.2e-16	0.98	<2.2e-16	0.98	<2.2e-16	0.98	<2.2e-16	0.98	<2.2e-16	0.97	<2.2e-16	0.98	<2.2e-16	0.98	<2.2e-16	0.98	<2.2e-16	0.98	<2.2e-16	0.98	<2.2e-16	0.97	<2.2e-16	0.98	<2.2e-16	0.98
H3K4ME3	0.99	<2.2e-16	0.99	<2.2e-16	0.99	<2.2e-16	0.99	<2.2e-16	0.98	<2.2e-16	0.98	<2.2e-16	0.98	<2.2e-16	0.98	<2.2e-16	0.98	<2.2e-16	0.98	<2.2e-16	0.96	<2.2e-16	0.96	<2.2e-16	0.98	<2.2e-16	0.98	<2.2e-16	0.97	<2.2e-16	0.98	<2.2e-16	0.96	<2.2e-16	0.97	<2.2e-16	0.99	<2.2e-16	0.98	<2.2e-16	0.97	<2.2e-16	0.98	<2.2e-16	0.94	<2.2e-16	0.96	<2.2e-16	0.98
H3K56AC	NA	NA	NA	NA	NA	NA	NA	NA	NA	NA	NA	NA	NA	NA	NA	NA	NA	NA	NA	NA	NA	NA	NA	NA	0.94	<2.2e-16	0.92	<2.2e-16	0.86	<2.2e-16	0.91	<2.2e-16	0.86	<2.2e-16	0.88	<2.2e-16	0.98	<2.2e-16	0.98	<2.2e-16	0.96	<2.2e-16	0.98	<2.2e-16	0.96	<2.2e-16	0.97	<2.2e-16	0.91
H3K79ME1	NA	NA	NA	NA	NA	NA	NA	NA	NA	NA	NA	NA	NA	NA	NA	NA	NA	NA	NA	NA	NA	NA	NA	NA	0.9	<2.2e-16	0.94	<2.2e-16	0.89	<2.2e-16	0.89	<2.2e-16	0.84	<2.2e-16	0.87	<2.2e-16	0.95	<2.2e-16	0.97	<2.2e-16	0.97	<2.2e-16	0.97	<2.2e-16	0.96	<2.2e-16	0.97	<2.2e-16	0.88
H3K79ME2	0.95	<2.2e-16	0.94	<2.2e-16	0.91	<2.2e-16	0.93	<2.2e-16	0.9	<2.2e-16	0.91	<2.2e-16	0.96	<2.2e-16	0.94	<2.2e-16	0.9	<2.2e-16	0.93	<2.2e-16	0.89	<2.2e-16	0.89	<2.2e-16	0.89	<2.2e-16	0.93	<2.2e-16	0.92	<2.2e-16	0.91	<2.2e-16	0.88	<2.2e-16	0.91	<2.2e-16	0.94	<2.2e-16	0.95	<2.2e-16	0.93	<2.2e-16	0.95	<2.2e-16	0.92	<2.2e-16	0.95	<2.2e-16	0.87
H3K9AC	0.99	<2.2e-16	0.99	<2.2e-16	0.99	<2.2e-16	0.99	<2.2e-16	0.98	<2.2e-16	0.98	<2.2e-16	0.98	<2.2e-16	0.98	<2.2e-16	0.97	<2.2e-16	0.98	<2.2e-16	0.96	<2.2e-16	0.96	<2.2e-16	0.98	<2.2e-16	0.96	<2.2e-16	0.94	<2.2e-16	0.95	<2.2e-16	0.89	<2.2e-16	0.91	<2.2e-16	0.99	<2.2e-16	0.99	<2.2e-16	0.98	<2.2e-16	0.99	<2.2e-16	0.97	<2.2e-16	0.98	<2.2e-16	0.97
H3K9ME1	0.89	<2.2e-16	0.93	<2.2e-16	0.9	<2.2e-16	0.9	<2.2e-16	0.87	<2.2e-16	0.9	<2.2e-16	NA	NA	NA	NA	NA	NA	NA	NA	NA	NA	NA	NA	NA	NA	NA	NA	NA	NA	NA	NA	NA	NA	NA	NA	0.91	<2.2e-16	0.94	<2.2e-16	0.91	<2.2e-16	0.95	<2.2e-16	0.94	<2.2e-16	0.95	<2.2e-16	NA
H3K9ME3	0.79	<2.2e-16	0.85	<2.2e-16	0.79	<2.2e-16	0.75	<2.2e-16	0.73	<2.2e-16	0.76	<2.2e-16	0.48	<2.2e-16	0.56	<2.2e-16	0.52	<2.2e-16	0.51	<2.2e-16	0.5	<2.2e-16	0.53	<2.2e-16	0.71	<2.2e-16	0.85	<2.2e-16	0.81	<2.2e-16	0.8	<2.2e-16	0.77	<2.2e-16	0.81	<2.2e-16	0.63	<2.2e-16	0.56	<2.2e-16	0.5	<2.2e-16	0.51	<2.2e-16	0.49	<2.2e-16	0.51	<2.2e-16	0.87
H3T11PH	NA	NA	NA	NA	NA	NA	NA	NA	NA	NA	NA	NA	NA	NA	NA	NA	NA	NA	NA	NA	NA	NA	NA	NA	NA	NA	NA	NA	NA	NA	NA	NA	NA	NA	NA	NA	NA	NA	NA	NA	NA	NA	NA	NA	NA	NA	NA	NA	0.93
H4K20ME1	0.87	<2.2e-16	0.92	<2.2e-16	0.89	<2.2e-16	0.91	<2.2e-16	0.88	<2.2e-16	0.91	<2.2e-16	0.73	<2.2e-16	0.85	<2.2e-16	0.82	<2.2e-16	0.81	<2.2e-16	0.78	<2.2e-16	0.81	<2.2e-16	0.87	<2.2e-16	0.93	<2.2e-16	0.91	<2.2e-16	0.88	<2.2e-16	0.84	<2.2e-16	0.88	<2.2e-16	0.88	<2.2e-16	0.93	<2.2e-16	0.9	<2.2e-16	0.9	<2.2e-16	0.88	<2.2e-16	0.9	<2.2e-16	0.79
H4K5AC	NA	NA	NA	NA	NA	NA	NA	NA	NA	NA	NA	NA	NA	NA	NA	NA	NA	NA	NA	NA	NA	NA	NA	NA	0.95	<2.2e-16	0.93	<2.2e-16	0.91	<2.2e-16	0.93	<2.2e-16	0.87	<2.2e-16	0.89	<2.2e-16	0.99	<2.2e-16	0.99	<2.2e-16	0.98	<2.2e-16	0.99	<2.2e-16	0.99	<2.2e-16	0.99	<2.2e-16	0.93
H4K8AC	NA	NA	NA	NA	NA	NA	NA	NA	NA	NA	NA	NA	NA	NA	NA	NA	NA	NA	NA	NA	NA	NA	NA	NA	0.93	<2.2e-16	0.95	<2.2e-16	0.94	<2.2e-16	0.94	<2.2e-16	0.91	<2.2e-16	0.93	<2.2e-16	0.99	<2.2e-16	0.99	<2.2e-16	0.99	<2.2e-16	0.99	<2.2e-16	0.99	<2.2e-16	0.99	<2.2e-16	0.9
H4K91AC	NA	NA	NA	NA	NA	NA	NA	NA	NA	NA	NA	NA	NA	NA	NA	NA	NA	NA	NA	NA	NA	NA	NA	NA	0.96	<2.2e-16	0.97	<2.2e-16	0.96	<2.2e-16	0.97	<2.2e-16	0.95	<2.2e-16	0.96	<2.2e-16	0.99	<2.2e-16	0.99	<2.2e-16	0.98	<2.2e-16	0.99	<2.2e-16	0.98	<2.2e-16	0.98	<2.2e-16	0.89
HCFC1	0.98	<2.2e-16	0.97	<2.2e-16	0.97	<2.2e-16	0.97	<2.2e-16	0.95	<2.2e-16	0.96	<2.2e-16	NA	NA	NA	NA	NA	NA	NA	NA	NA	NA	NA	NA	NA	NA	NA	NA	NA	NA	NA	NA	NA	NA	NA	NA	NA	NA	NA	NA	NA	NA	NA	NA	NA	NA	NA	NA	NA
HDAC1	0.98	<2.2e-16	0.97	<2.2e-16	0.96	<2.2e-16	0.97	<2.2e-16	0.94	<2.2e-16	0.95	<2.2e-16	NA	NA	NA	NA	NA	NA	NA	NA	NA	NA	NA	NA	NA	NA	NA	NA	NA	NA	NA	NA	NA	NA	NA	NA	NA	NA	NA	NA	NA	NA	NA	NA	NA	NA	NA	NA	NA
HDAC2	0.96	<2.2e-16	0.96	<2.2e-16	0.95	<2.2e-16	0.96	<2.2e-16	0.93	<2.2e-16	0.94	<2.2e-16	NA	NA	NA	NA	NA	NA	NA	NA	NA	NA	NA	NA	0.96	<2.2e-16	0.97	<2.2e-16	0.95	<2.2e-16	0.96	<2.2e-16	0.92	<2.2e-16	0.94	<2.2e-16	NA	NA	NA	NA	NA	NA	NA	NA	NA	NA	NA	NA	NA
HDAC6	0.91	<2.2e-16	0.94	<2.2e-16	0.93	<2.2e-16	0.92	<2.2e-16	0.89	<2.2e-16	0.91	<2.2e-16	NA	NA	NA	NA	NA	NA	NA	NA	NA	NA	NA	NA	0.78	<2.2e-16	0.89	<2.2e-16	0.83	<2.2e-16	0.81	<2.2e-16	0.76	<2.2e-16	0.79	<2.2e-16	NA	NA	NA	NA	NA	NA	NA	NA	NA	NA	NA	NA	NA
HMGN3	0.98	<2.2e-16	0.98	<2.2e-16	0.97	<2.2e-16	0.97	<2.2e-16	0.93	<2.2e-16	0.95	<2.2e-16	NA	NA	NA	NA	NA	NA	NA	NA	NA	NA	NA	NA	NA	NA	NA	NA	NA	NA	NA	NA	NA	NA	NA	NA	NA	NA	NA	NA	NA	NA	NA	NA	NA	NA	NA	NA	NA
IKZF1	NA	NA	NA	NA	NA	NA	NA	NA	NA	NA	NA	NA	0.89	<2.2e-16	0.94	<2.2e-16	0.91	<2.2e-16	0.92	<2.2e-16	0.89	<2.2e-16	0.91	<2.2e-16	NA	NA	NA	NA	NA	NA	NA	NA	NA	NA	NA	NA	NA	NA	NA	NA	NA	NA	NA	NA	NA	NA	NA	NA	NA
IRF1	0.93	<2.2e-16	0.92	<2.2e-16	0.87	<2.2e-16	0.9	<2.2e-16	0.85	<2.2e-16	0.89	<2.2e-16	NA	NA	NA	NA	NA	NA	NA	NA	NA	NA	NA	NA	NA	NA	NA	NA	NA	NA	NA	NA	NA	NA	NA	NA	NA	NA	NA	NA	NA	NA	NA	NA	NA	NA	NA	NA	NA
IRF3	NA	NA	NA	NA	NA	NA	NA	NA	NA	NA	NA	NA	0.95	<2.2e-16	0.92	<2.2e-16	0.86	<2.2e-16	0.91	<2.2e-16	0.86	<2.2e-16	0.88	<2.2e-16	NA	NA	NA	NA	NA	NA	NA	NA	NA	NA	NA	NA	NA	NA	NA	NA	NA	NA	NA	NA	NA	NA	NA	NA	NA
IRF4	NA	NA	NA	NA	NA	NA	NA	NA	NA	NA	NA	NA	0.83	<2.2e-16	0.85	<2.2e-16	0.84	<2.2e-16	0.89	<2.2e-16	0.87	<2.2e-16	0.87	<2.2e-16	NA	NA	NA	NA	NA	NA	NA	NA	NA	NA	NA	NA	NA	NA	NA	NA	NA	NA	NA	NA	NA	NA	NA	NA	NA
JARID1A	NA	NA	NA	NA	NA	NA	NA	NA	NA	NA	NA	NA	NA	NA	NA	NA	NA	NA	NA	NA	NA	NA	NA	NA	0.8	<2.2e-16	0.8	<2.2e-16	0.68	<2.2e-16	0.71	<2.2e-16	0.67	<2.2e-16	0.67	<2.2e-16	NA	NA	NA	NA	NA	NA	NA	NA	NA	NA	NA	NA	NA
JARID1B-PLU1	0.97	<2.2e-16	0.97	<2.2e-16	0.95	<2.2e-16	0.97	<2.2e-16	0.94	<2.2e-16	0.95	<2.2e-16	NA	NA	NA	NA	NA	NA	NA	NA	NA	NA	NA	NA	0.72	<2.2e-16	0.85	<2.2e-16	0.73	<2.2e-16	0.76	<2.2e-16	0.71	<2.2e-16	0.71	<2.2e-16	NA	NA	NA	NA	NA	NA	NA	NA	NA	NA	NA	NA	NA
JMJD2	NA	NA	NA	NA	NA	NA	NA	NA	NA	NA	NA	NA	NA	NA	NA	NA	NA	NA	NA	NA	NA	NA	NA	NA	0.94	<2.2e-16	0.96	<2.2e-16	0.95	<2.2e-16	0.96	<2.2e-16	0.93	<2.2e-16	0.95	<2.2e-16	NA	NA	NA	NA	NA	NA	NA	NA	NA	NA	NA	NA	NA
JUN	0.98	<2.2e-16	0.98	<2.2e-16	0.96	<2.2e-16	0.98	<2.2e-16	0.95	<2.2e-16	0.96	<2.2e-16	NA	NA	NA	NA	NA	NA	NA	NA	NA	NA	NA	NA	0.9	<2.2e-16	0.91	<2.2e-16	0.85	<2.2e-16	0.91	<2.2e-16	0.85	<2.2e-16	0.88	<2.2e-16	NA	NA	NA	NA	NA	NA	NA	NA	NA	NA	NA	NA	NA
JUND (AND EGFP-JUND)	0.97	<2.2e-16	0.98	<2.2e-16	0.97	<2.2e-16	0.98	<2.2e-16	0.96	<2.2e-16	0.97	<2.2e-16	0.94	<2.2e-16	0.93	<2.2e-16	0.89	<2.2e-16	0.93	<2.2e-16	0.85	<2.2e-16	0.88	<2.2e-16	0.94	<2.2e-16	0.95	<2.2e-16	0.93	<2.2e-16	0.95	<2.2e-16	0.91	<2.2e-16	0.93	<2.2e-16	NA	NA	NA	NA	NA	NA	NA	NA	NA	NA	NA	NA	NA
KAP1	0.94	<2.2e-16	0.94	<2.2e-16	0.91	<2.2e-16	0.91	<2.2e-16	0.88	<2.2e-16	0.9	<2.2e-16	NA	NA	NA	NA	NA	NA	NA	NA	NA	NA	NA	NA	NA	NA	NA	NA	NA	NA	NA	NA	NA	NA	NA	NA	NA	NA	NA	NA	NA	NA	NA	NA	NA	NA	NA	NA	NA
KAT2A-GCN5	NA	NA	NA	NA	NA	NA	NA	NA	NA	NA	NA	NA	0.89	<2.2e-16	0.9	<2.2e-16	0.82	<2.2e-16	0.88	<2.2e-16	0.84	<2.2e-16	0.87	<2.2e-16	NA	NA	NA	NA	NA	NA	NA	NA	NA	NA	NA	NA	NA	NA	NA	NA	NA	NA	NA	NA	NA	NA	NA	NA	NA
KAT2B-PCAF	0.89	<2.2e-16	0.89	<2.2e-16	0.83	<2.2e-16	0.85	<2.2e-16	0.81	<2.2e-16	0.83	<2.2e-16	NA	NA	NA	NA	NA	NA	NA	NA	NA	NA	NA	NA	NA	NA	NA	NA	NA	NA	NA	NA	NA	NA	NA	NA	NA	NA	NA	NA	NA	NA	NA	NA	NA	NA	NA	NA	NA
KDM1A-LSD1	0.92	<2.2e-16	0.92	<2.2e-16	0.88	<2.2e-16	0.92	<2.2e-16	0.88	<2.2e-16	0.91	<2.2e-16	NA	NA	NA	NA	NA	NA	NA	NA	NA	NA	NA	NA	NA	NA	NA	NA	NA	NA	NA	NA	NA	NA	NA	NA	NA	NA	NA	NA	NA	NA	NA	NA	NA	NA	NA	NA	NA
MAFF	0.96	<2.2e-16	0.96	<2.2e-16	0.94	<2.2e-16	0.95	<2.2e-16	0.93	<2.2e-16	0.94	<2.2e-16	NA	NA	NA	NA	NA	NA	NA	NA	NA	NA	NA	NA	NA	NA	NA	NA	NA	NA	NA	NA	NA	NA	NA	NA	NA	NA	NA	NA	NA	NA	NA	NA	NA	NA	NA	NA	NA
MAFK	0.97	<2.2e-16	0.97	<2.2e-16	0.96	<2.2e-16	0.97	<2.2e-16	0.95	<2.2e-16	0.96	<2.2e-16	0.96	<2.2e-16	0.95	<2.2e-16	0.91	<2.2e-16	0.94	<2.2e-16	0.9	<2.2e-16	0.91	<2.2e-16	0.86	<2.2e-16	0.88	<2.2e-16	0.84	<2.2e-16	0.88	<2.2e-16	0.84	<2.2e-16	0.86	<2.2e-16	0.86	<2.2e-16	0.84	<2.2e-16	0.81	<2.2e-16	0.85	<2.2e-16	0.83	<2.2e-16	0.83	<2.2e-16	NA
MAX	0.98	<2.2e-16	0.98	<2.2e-16	0.97	<2.2e-16	0.98	<2.2e-16	0.95	<2.2e-16	0.96	<2.2e-16	0.98	<2.2e-16	0.98	<2.2e-16	0.97	<2.2e-16	0.98	<2.2e-16	0.94	<2.2e-16	0.96	<2.2e-16	0.96	<2.2e-16	0.97	<2.2e-16	0.97	<2.2e-16	0.97	<2.2e-16	0.95	<2.2e-16	0.96	<2.2e-16	NA	NA	NA	NA	NA	NA	NA	NA	NA	NA	NA	NA	NA
MAZ	0.96	<2.2e-16	0.98	<2.2e-16	0.98	<2.2e-16	0.98	<2.2e-16	0.97	<2.2e-16	0.98	<2.2e-16	0.94	<2.2e-16	0.96	<2.2e-16	0.96	<2.2e-16	0.97	<2.2e-16	0.94	<2.2e-16	0.96	<2.2e-16	NA	NA	NA	NA	NA	NA	NA	NA	NA	NA	NA	NA	0.9	<2.2e-16	0.95	<2.2e-16	0.94	<2.2e-16	0.95	<2.2e-16	0.92	<2.2e-16	0.94	<2.2e-16	NA
MEF2A	0.85	<2.2e-16	0.83	<2.2e-16	0.72	<2.2e-16	0.76	<2.2e-16	0.66	<2.2e-16	0.66	<2.2e-16	0.88	<2.2e-16	0.87	<2.2e-16	0.79	<2.2e-16	0.87	<2.2e-16	0.74	<2.2e-16	0.77	<2.2e-16	NA	NA	NA	NA	NA	NA	NA	NA	NA	NA	NA	NA	NA	NA	NA	NA	NA	NA	NA	NA	NA	NA	NA	NA	NA
MEF2C	NA	NA	NA	NA	NA	NA	NA	NA	NA	NA	NA	NA	0.86	<2.2e-16	0.84	<2.2e-16	0.8	<2.2e-16	0.86	<2.2e-16	0.77	<2.2e-16	0.79	<2.2e-16	NA	NA	NA	NA	NA	NA	NA	NA	NA	NA	NA	NA	NA	NA	NA	NA	NA	NA	NA	NA	NA	NA	NA	NA	NA
MTA3	NA	NA	NA	NA	NA	NA	NA	NA	NA	NA	NA	NA	0.97	<2.2e-16	0.97	<2.2e-16	0.97	<2.2e-16	0.97	<2.2e-16	0.95	<2.2e-16	0.96	<2.2e-16	NA	NA	NA	NA	NA	NA	NA	NA	NA	NA	NA	NA	NA	NA	NA	NA	NA	NA	NA	NA	NA	NA	NA	NA	NA
MXI1	0.97	<2.2e-16	0.97	<2.2e-16	0.94	<2.2e-16	0.96	<2.2e-16	0.91	<2.2e-16	0.93	<2.2e-16	0.97	<2.2e-16	0.97	<2.2e-16	0.97	<2.2e-16	0.98	<2.2e-16	0.94	<2.2e-16	0.95	<2.2e-16	0.96	<2.2e-16	0.96	<2.2e-16	0.95	<2.2e-16	0.96	<2.2e-16	0.92	<2.2e-16	0.94	<2.2e-16	0.9	<2.2e-16	0.94	<2.2e-16	0.93	<2.2e-16	0.95	<2.2e-16	0.89	<2.2e-16	0.92	<2.2e-16	NA
MYC	0.96	<2.2e-16	0.95	<2.2e-16	0.93	<2.2e-16	0.95	<2.2e-16	0.88	<2.2e-16	0.92	<2.2e-16	0.92	<2.2e-16	0.91	<2.2e-16	0.86	<2.2e-16	0.88	<2.2e-16	0.78	<2.2e-16	0.81	<2.2e-16	0.95	<2.2e-16	0.94	<2.2e-16	0.9	<2.2e-16	0.94	<2.2e-16	0.88	<2.2e-16	0.9	<2.2e-16	NA	NA	NA	NA	NA	NA	NA	NA	NA	NA	NA	NA	NA
NANOG	NA	NA	NA	NA	NA	NA	NA	NA	NA	NA	NA	NA	NA	NA	NA	NA	NA	NA	NA	NA	NA	NA	NA	NA	0.86	<2.2e-16	0.9	<2.2e-16	0.86	<2.2e-16	0.88	<2.2e-16	0.79	<2.2e-16	0.83	<2.2e-16	NA	NA	NA	NA	NA	NA	NA	NA	NA	NA	NA	NA	NA
NCOR1	0.85	<2.2e-16	0.84	<2.2e-16	0.74	<2.2e-16	0.82	<2.2e-16	0.74	<2.2e-16	0.77	<2.2e-16	NA	NA	NA	NA	NA	NA	NA	NA	NA	NA	NA	NA	NA	NA	NA	NA	NA	NA	NA	NA	NA	NA	NA	NA	NA	NA	NA	NA	NA	NA	NA	NA	NA	NA	NA	NA	NA
NFATC1	NA	NA	NA	NA	NA	NA	NA	NA	NA	NA	NA	NA	0.93	<2.2e-16	0.94	<2.2e-16	0.94	<2.2e-16	0.94	<2.2e-16	0.9	<2.2e-16	0.92	<2.2e-16	NA	NA	NA	NA	NA	NA	NA	NA	NA	NA	NA	NA	NA	NA	NA	NA	NA	NA	NA	NA	NA	NA	NA	NA	NA
NFE2	0.9	<2.2e-16	0.91	<2.2e-16	0.87	<2.2e-16	0.89	<2.2e-16	0.83	<2.2e-16	0.87	<2.2e-16	0.92	<2.2e-16	0.9	<2.2e-16	0.82	<2.2e-16	0.9	<2.2e-16	0.85	<2.2e-16	0.87	<2.2e-16	NA	NA	NA	NA	NA	NA	NA	NA	NA	NA	NA	NA	NA	NA	NA	NA	NA	NA	NA	NA	NA	NA	NA	NA	NA
NFIC	NA	NA	NA	NA	NA	NA	NA	NA	NA	NA	NA	NA	0.96	<2.2e-16	0.96	<2.2e-16	0.95	<2.2e-16	0.97	<2.2e-16	0.94	<2.2e-16	0.95	<2.2e-16	NA	NA	NA	NA	NA	NA	NA	NA	NA	NA	NA	NA	NA	NA	NA	NA	NA	NA	NA	NA	NA	NA	NA	NA	NA
NFYA	0.96	<2.2e-16	0.94	<2.2e-16	0.88	<2.2e-16	0.91	<2.2e-16	0.85	<2.2e-16	0.88	<2.2e-16	0.93	<2.2e-16	0.9	<2.2e-16	0.82	<2.2e-16	0.86	<2.2e-16	0.83	<2.2e-16	0.84	<2.2e-16	NA	NA	NA	NA	NA	NA	NA	NA	NA	NA	NA	NA	NA	NA	NA	NA	NA	NA	NA	NA	NA	NA	NA	NA	NA
NFYB	0.92	<2.2e-16	0.86	<2.2e-16	0.83	<2.2e-16	0.82	<2.2e-16	0.78	<2.2e-16	0.81	<2.2e-16	0.92	<2.2e-16	0.83	<2.2e-16	0.78	<2.2e-16	0.81	<2.2e-16	0.76	<2.2e-16	0.8	<2.2e-16	NA	NA	NA	NA	NA	NA	NA	NA	NA	NA	NA	NA	NA	NA	NA	NA	NA	NA	NA	NA	NA	NA	NA	NA	NA
NR2F2	0.94	<2.2e-16	0.94	<2.2e-16	0.93	<2.2e-16	0.95	<2.2e-16	0.91	<2.2e-16	0.93	<2.2e-16	NA	NA	NA	NA	NA	NA	NA	NA	NA	NA	NA	NA	NA	NA	NA	NA	NA	NA	NA	NA	NA	NA	NA	NA	NA	NA	NA	NA	NA	NA	NA	NA	NA	NA	NA	NA	NA
NRF1	0.82	<2.2e-16	0.91	<2.2e-16	0.89	<2.2e-16	0.9	<2.2e-16	0.88	<2.2e-16	0.9	<2.2e-16	0.78	<2.2e-16	0.9	<2.2e-16	0.93	<2.2e-16	0.94	<2.2e-16	0.9	<2.2e-16	0.92	<2.2e-16	0.67	<2.2e-16	0.87	<2.2e-16	0.87	<2.2e-16	0.91	<2.2e-16	0.86	<2.2e-16	0.89	<2.2e-16	NA	NA	NA	NA	NA	NA	NA	NA	NA	NA	NA	NA	NA
NRSF	NA	NA	NA	NA	NA	NA	NA	NA	NA	NA	NA	NA	NA	NA	NA	NA	NA	NA	NA	NA	NA	NA	NA	NA	0.36	<2.2e-16	0.32	<2.2e-16	0.34	<2.2e-16	0.46	<2.2e-16	0.42	<2.2e-16	0.41	<2.2e-16	NA	NA	NA	NA	NA	NA	NA	NA	NA	NA	NA	NA	NA
NRSF-REST	NA	NA	NA	NA	NA	NA	NA	NA	NA	NA	NA	NA	0.48	<2.2e-16	0.39	<2.2e-16	0.48	<2.2e-16	0.55	<2.2e-16	0.43	<2.2e-16	0.49	<2.2e-16	NA	NA	NA	NA	NA	NA	NA	NA	NA	NA	NA	NA	NA	NA	NA	NA	NA	NA	NA	NA	NA	NA	NA	NA	NA
P300	0.96	<2.2e-16	0.96	<2.2e-16	0.92	<2.2e-16	0.93	<2.2e-16	0.9	<2.2e-16	0.92	<2.2e-16	0.97	<2.2e-16	0.97	<2.2e-16	0.95	<2.2e-16	0.97	<2.2e-16	0.93	<2.2e-16	0.95	<2.2e-16	0.87	<2.2e-16	0.92	<2.2e-16	0.89	<2.2e-16	0.9	<2.2e-16	0.85	<2.2e-16	0.86	<2.2e-16	NA	NA	NA	NA	NA	NA	NA	NA	NA	NA	NA	NA	NA
PAX5	NA	NA	NA	NA	NA	NA	NA	NA	NA	NA	NA	NA	0.86	<2.2e-16	0.89	<2.2e-16	0.9	<2.2e-16	0.92	<2.2e-16	0.89	<2.2e-16	0.91	<2.2e-16	NA	NA	NA	NA	NA	NA	NA	NA	NA	NA	NA	NA	NA	NA	NA	NA	NA	NA	NA	NA	NA	NA	NA	NA	NA
PBX3	NA	NA	NA	NA	NA	NA	NA	NA	NA	NA	NA	NA	0.71	<2.2e-16	0.73	<2.2e-16	0.71	<2.2e-16	0.76	<2.2e-16	0.72	<2.2e-16	0.73	<2.2e-16	NA	NA	NA	NA	NA	NA	NA	NA	NA	NA	NA	NA	NA	NA	NA	NA	NA	NA	NA	NA	NA	NA	NA	NA	NA
PHF8	0.96	<2.2e-16	0.96	<2.2e-16	0.96	<2.2e-16	0.97	<2.2e-16	0.94	<2.2e-16	0.95	<2.2e-16	NA	NA	NA	NA	NA	NA	NA	NA	NA	NA	NA	NA	NA	NA	NA	NA	NA	NA	NA	NA	NA	NA	NA	NA	NA	NA	NA	NA	NA	NA	NA	NA	NA	NA	NA	NA	NA
PML	0.95	<2.2e-16	0.94	<2.2e-16	0.91	<2.2e-16	0.93	<2.2e-16	0.86	<2.2e-16	0.87	<2.2e-16	0.98	<2.2e-16	0.98	<2.2e-16	0.97	<2.2e-16	0.98	<2.2e-16	0.94	<2.2e-16	0.96	<2.2e-16	NA	NA	NA	NA	NA	NA	NA	NA	NA	NA	NA	NA	NA	NA	NA	NA	NA	NA	NA	NA	NA	NA	NA	NA	NA
POL2	0.97	<2.2e-16	0.95	<2.2e-16	0.93	<2.2e-16	0.96	<2.2e-16	0.91	<2.2e-16	0.91	<2.2e-16	0.98	<2.2e-16	0.98	<2.2e-16	0.96	<2.2e-16	0.97	<2.2e-16	0.94	<2.2e-16	0.94	<2.2e-16	0.95	<2.2e-16	0.94	<2.2e-16	0.91	<2.2e-16	0.94	<2.2e-16	0.88	<2.2e-16	0.88	<2.2e-16	0.86	<2.2e-16	0.89	<2.2e-16	0.86	<2.2e-16	0.92	<2.2e-16	0.9	<2.2e-16	0.91	<2.2e-16	NA
POL3	0.71	<2.2e-16	0.75	<2.2e-16	0.62	<2.2e-16	0.66	<2.2e-16	0.6	<2.2e-16	0.65	<2.2e-16	0.82	<2.2e-16	0.8	<2.2e-16	0.66	<2.2e-16	0.73	<2.2e-16	0.63	<2.2e-16	0.65	<2.2e-16	NA	NA	NA	NA	NA	NA	NA	NA	NA	NA	NA	NA	NA	NA	NA	NA	NA	NA	NA	NA	NA	NA	NA	NA	NA
POU2F2	NA	NA	NA	NA	NA	NA	NA	NA	NA	NA	NA	NA	0.93	<2.2e-16	0.92	<2.2e-16	0.92	<2.2e-16	0.93	<2.2e-16	0.89	<2.2e-16	0.91	<2.2e-16	NA	NA	NA	NA	NA	NA	NA	NA	NA	NA	NA	NA	NA	NA	NA	NA	NA	NA	NA	NA	NA	NA	NA	NA	NA
POU5F1	NA	NA	NA	NA	NA	NA	NA	NA	NA	NA	NA	NA	NA	NA	NA	NA	NA	NA	NA	NA	NA	NA	NA	NA	0.44	<2.2e-16	0.46	<2.2e-16	0.34	<2.2e-16	0.44	<2.2e-16	0.38	<2.2e-16	0.37	<2.2e-16	NA	NA	NA	NA	NA	NA	NA	NA	NA	NA	NA	NA	NA
RAD21	0.92	<2.2e-16	0.92	<2.2e-16	0.91	<2.2e-16	0.91	<2.2e-16	0.86	<2.2e-16	0.9	<2.2e-16	0.95	<2.2e-16	0.94	<2.2e-16	0.95	<2.2e-16	0.96	<2.2e-16	0.91	<2.2e-16	0.94	<2.2e-16	0.86	<2.2e-16	0.89	<2.2e-16	0.9	<2.2e-16	0.91	<2.2e-16	0.89	<2.2e-16	0.92	<2.2e-16	0.9	<2.2e-16	0.94	<2.2e-16	0.95	<2.2e-16	0.95	<2.2e-16	0.94	<2.2e-16	0.95	<2.2e-16	NA
RBBP5	0.96	<2.2e-16	0.97	<2.2e-16	0.96	<2.2e-16	0.97	<2.2e-16	0.94	<2.2e-16	0.96	<2.2e-16	NA	NA	NA	NA	NA	NA	NA	NA	NA	NA	NA	NA	0.95	<2.2e-16	0.97	<2.2e-16	0.96	<2.2e-16	0.97	<2.2e-16	0.94	<2.2e-16	0.96	<2.2e-16	NA	NA	NA	NA	NA	NA	NA	NA	NA	NA	NA	NA	NA
RDBP-NELF-E	0.91	<2.2e-16	0.9	<2.2e-16	0.82	<2.2e-16	0.85	<2.2e-16	0.79	<2.2e-16	0.81	<2.2e-16	NA	NA	NA	NA	NA	NA	NA	NA	NA	NA	NA	NA	NA	NA	NA	NA	NA	NA	NA	NA	NA	NA	NA	NA	NA	NA	NA	NA	NA	NA	NA	NA	NA	NA	NA	NA	NA
RELA	NA	NA	NA	NA	NA	NA	NA	NA	NA	NA	NA	NA	0.96	<2.2e-16	0.96	<2.2e-16	0.94	<2.2e-16	0.96	<2.2e-16	0.92	<2.2e-16	0.93	<2.2e-16	NA	NA	NA	NA	NA	NA	NA	NA	NA	NA	NA	NA	NA	NA	NA	NA	NA	NA	NA	NA	NA	NA	NA	NA	NA
REST	0.8	<2.2e-16	0.73	<2.2e-16	0.83	<2.2e-16	0.88	<2.2e-16	0.8	<2.2e-16	0.84	<2.2e-16	NA	NA	NA	NA	NA	NA	NA	NA	NA	NA	NA	NA	NA	NA	NA	NA	NA	NA	NA	NA	NA	NA	NA	NA	NA	NA	NA	NA	NA	NA	NA	NA	NA	NA	NA	NA	NA
RFX5	0.95	<2.2e-16	0.95	<2.2e-16	0.93	<2.2e-16	0.94	<2.2e-16	0.91	<2.2e-16	0.93	<2.2e-16	0.95	<2.2e-16	0.94	<2.2e-16	0.92	<2.2e-16	0.95	<2.2e-16	0.9	<2.2e-16	0.91	<2.2e-16	0.91	<2.2e-16	0.91	<2.2e-16	0.88	<2.2e-16	0.93	<2.2e-16	0.89	<2.2e-16	0.91	<2.2e-16	0.92	<2.2e-16	0.91	<2.2e-16	0.88	<2.2e-16	0.91	<2.2e-16	0.86	<2.2e-16	0.89	<2.2e-16	NA
RNF2	0.88	<2.2e-16	0.89	<2.2e-16	0.84	<2.2e-16	0.9	<2.2e-16	0.85	<2.2e-16	0.88	<2.2e-16	NA	NA	NA	NA	NA	NA	NA	NA	NA	NA	NA	NA	NA	NA	NA	NA	NA	NA	NA	NA	NA	NA	NA	NA	NA	NA	NA	NA	NA	NA	NA	NA	NA	NA	NA	NA	NA
RPC155	0.9	<2.2e-16	0.89	<2.2e-16	0.83	<2.2e-16	0.88	<2.2e-16	0.82	<2.2e-16	0.85	<2.2e-16	NA	NA	NA	NA	NA	NA	NA	NA	NA	NA	NA	NA	NA	NA	NA	NA	NA	NA	NA	NA	NA	NA	NA	NA	NA	NA	NA	NA	NA	NA	NA	NA	NA	NA	NA	NA	NA
RUNX3	NA	NA	NA	NA	NA	NA	NA	NA	NA	NA	NA	NA	0.92	<2.2e-16	0.93	<2.2e-16	0.93	<2.2e-16	0.94	<2.2e-16	0.93	<2.2e-16	0.93	<2.2e-16	NA	NA	NA	NA	NA	NA	NA	NA	NA	NA	NA	NA	NA	NA	NA	NA	NA	NA	NA	NA	NA	NA	NA	NA	NA
RXRA	NA	NA	NA	NA	NA	NA	NA	NA	NA	NA	NA	NA	0.81	<2.2e-16	0.78	<2.2e-16	0.71	<2.2e-16	0.8	<2.2e-16	0.69	<2.2e-16	0.74	<2.2e-16	0.35	<2.2e-16	0.38	<2.2e-16	0.34	<2.2e-16	0.39	<2.2e-16	0.33	<2.2e-16	0.31	<2.2e-16	NA	NA	NA	NA	NA	NA	NA	NA	NA	NA	NA	NA	NA
SAP30	0.98	<2.2e-16	0.96	<2.2e-16	0.92	<2.2e-16	0.95	<2.2e-16	0.85	<2.2e-16	0.86	<2.2e-16	NA	NA	NA	NA	NA	NA	NA	NA	NA	NA	NA	NA	0.95	<2.2e-16	0.94	<2.2e-16	0.92	<2.2e-16	0.95	<2.2e-16	0.86	<2.2e-16	0.88	<2.2e-16	NA	NA	NA	NA	NA	NA	NA	NA	NA	NA	NA	NA	NA
SETDB1	0.94	<2.2e-16	0.96	<2.2e-16	0.94	<2.2e-16	0.93	<2.2e-16	0.91	<2.2e-16	0.92	<2.2e-16	NA	NA	NA	NA	NA	NA	NA	NA	NA	NA	NA	NA	NA	NA	NA	NA	NA	NA	NA	NA	NA	NA	NA	NA	NA	NA	NA	NA	NA	NA	NA	NA	NA	NA	NA	NA	NA
SIN3A	NA	NA	NA	NA	NA	NA	NA	NA	NA	NA	NA	NA	0.97	<2.2e-16	0.97	<2.2e-16	0.94	<2.2e-16	0.96	<2.2e-16	0.87	<2.2e-16	0.9	<2.2e-16	0.98	<2.2e-16	0.98	<2.2e-16	0.98	<2.2e-16	0.98	<2.2e-16	0.95	<2.2e-16	0.96	<2.2e-16	NA	NA	NA	NA	NA	NA	NA	NA	NA	NA	NA	NA	NA
SIN3AK20	0.97	<2.2e-16	0.96	<2.2e-16	0.93	<2.2e-16	0.95	<2.2e-16	0.82	<2.2e-16	0.84	<2.2e-16	NA	NA	NA	NA	NA	NA	NA	NA	NA	NA	NA	NA	0.94	<2.2e-16	0.92	<2.2e-16	0.92	<2.2e-16	0.92	<2.2e-16	0.79	<2.2e-16	0.86	<2.2e-16	NA	NA	NA	NA	NA	NA	NA	NA	NA	NA	NA	NA	NA
SIRT6	0.96	<2.2e-16	0.95	<2.2e-16	0.92	<2.2e-16	0.94	<2.2e-16	0.91	<2.2e-16	0.93	<2.2e-16	NA	NA	NA	NA	NA	NA	NA	NA	NA	NA	NA	NA	0.87	<2.2e-16	0.92	<2.2e-16	0.91	<2.2e-16	0.88	<2.2e-16	0.84	<2.2e-16	0.86	<2.2e-16	NA	NA	NA	NA	NA	NA	NA	NA	NA	NA	NA	NA	NA
SIX5	0.96	<2.2e-16	0.86	<2.2e-16	0.53	<2.2e-16	0.57	<2.2e-16	0.45	<2.2e-16	0.39	<2.2e-16	0.92	<2.2e-16	0.87	<2.2e-16	0.77	<2.2e-16	0.82	<2.2e-16	0.68	<2.2e-16	0.72	<2.2e-16	0.86	<2.2e-16	0.7	<2.2e-16	0.34	<2.2e-16	0.36	<2.2e-16	0.29	<2.2e-16	0.26	<2.2e-16	NA	NA	NA	NA	NA	NA	NA	NA	NA	NA	NA	NA	NA
SMARCA4-BRG1	0.98	<2.2e-16	0.97	<2.2e-16	0.96	<2.2e-16	0.97	<2.2e-16	0.93	<2.2e-16	0.95	<2.2e-16	NA	NA	NA	NA	NA	NA	NA	NA	NA	NA	NA	NA	NA	NA	NA	NA	NA	NA	NA	NA	NA	NA	NA	NA	NA	NA	NA	NA	NA	NA	NA	NA	NA	NA	NA	NA	NA
SMARCB1-INI1	0.98	<2.2e-16	0.97	<2.2e-16	0.96	<2.2e-16	0.97	<2.2e-16	0.94	<2.2e-16	0.95	<2.2e-16	NA	NA	NA	NA	NA	NA	NA	NA	NA	NA	NA	NA	NA	NA	NA	NA	NA	NA	NA	NA	NA	NA	NA	NA	NA	NA	NA	NA	NA	NA	NA	NA	NA	NA	NA	NA	NA
SMC3	0.95	<2.2e-16	0.96	<2.2e-16	0.95	<2.2e-16	0.95	<2.2e-16	0.92	<2.2e-16	0.94	<2.2e-16	0.96	<2.2e-16	0.96	<2.2e-16	0.96	<2.2e-16	0.97	<2.2e-16	0.94	<2.2e-16	0.96	<2.2e-16	NA	NA	NA	NA	NA	NA	NA	NA	NA	NA	NA	NA	NA	NA	NA	NA	NA	NA	NA	NA	NA	NA	NA	NA	NA
SP1	0.87	<2.2e-16	0.86	<2.2e-16	0.82	<2.2e-16	0.87	<2.2e-16	0.75	<2.2e-16	0.76	<2.2e-16	0.89	<2.2e-16	0.87	<2.2e-16	0.87	<2.2e-16	0.9	<2.2e-16	0.89	<2.2e-16	0.89	<2.2e-16	0.86	<2.2e-16	0.84	<2.2e-16	0.86	<2.2e-16	0.86	<2.2e-16	0.78	<2.2e-16	0.83	<2.2e-16	NA	NA	NA	NA	NA	NA	NA	NA	NA	NA	NA	NA	NA
SP2	0.79	<2.2e-16	0.76	<2.2e-16	0.67	<2.2e-16	0.64	<2.2e-16	0.55	<2.2e-16	0.6	<2.2e-16	NA	NA	NA	NA	NA	NA	NA	NA	NA	NA	NA	NA	0.69	<2.2e-16	0.57	<2.2e-16	0.43	<2.2e-16	0.42	<2.2e-16	0.39	<2.2e-16	0.36	<2.2e-16	NA	NA	NA	NA	NA	NA	NA	NA	NA	NA	NA	NA	NA
SP4	NA	NA	NA	NA	NA	NA	NA	NA	NA	NA	NA	NA	NA	NA	NA	NA	NA	NA	NA	NA	NA	NA	NA	NA	0.87	<2.2e-16	0.89	<2.2e-16	0.9	<2.2e-16	0.9	<2.2e-16	0.82	<2.2e-16	0.87	<2.2e-16	NA	NA	NA	NA	NA	NA	NA	NA	NA	NA	NA	NA	NA
SPI1-PU1	0.59	<2.2e-16	0.63	<2.2e-16	0.63	<2.2e-16	0.73	<2.2e-16	0.69	<2.2e-16	0.72	<2.2e-16	0.62	<2.2e-16	0.65	<2.2e-16	0.62	<2.2e-16	0.71	<2.2e-16	0.65	<2.2e-16	0.67	<2.2e-16	NA	NA	NA	NA	NA	NA	NA	NA	NA	NA	NA	NA	NA	NA	NA	NA	NA	NA	NA	NA	NA	NA	NA	NA	NA
SREBP1	NA	NA	NA	NA	NA	NA	NA	NA	NA	NA	NA	NA	0.96	<2.2e-16	0.95	<2.2e-16	0.92	<2.2e-16	0.94	<2.2e-16	0.89	<2.2e-16	0.91	<2.2e-16	NA	NA	NA	NA	NA	NA	NA	NA	NA	NA	NA	NA	NA	NA	NA	NA	NA	NA	NA	NA	NA	NA	NA	NA	NA
SREBP2	NA	NA	NA	NA	NA	NA	NA	NA	NA	NA	NA	NA	0.96	<2.2e-16	0.95	<2.2e-16	0.92	<2.2e-16	0.94	<2.2e-16	0.89	<2.2e-16	0.91	<2.2e-16	NA	NA	NA	NA	NA	NA	NA	NA	NA	NA	NA	NA	NA	NA	NA	NA	NA	NA	NA	NA	NA	NA	NA	NA	NA
SRF	0.84	<2.2e-16	0.81	<2.2e-16	0.72	<2.2e-16	0.77	<2.2e-16	0.65	<2.2e-16	0.67	<2.2e-16	0.85	<2.2e-16	0.85	<2.2e-16	0.82	<2.2e-16	0.86	<2.2e-16	0.71	<2.2e-16	0.76	<2.2e-16	0.66	<2.2e-16	0.57	<2.2e-16	0.41	<2.2e-16	0.46	<2.2e-16	0.35	<2.2e-16	0.33	<2.2e-16	NA	NA	NA	NA	NA	NA	NA	NA	NA	NA	NA	NA	NA
STAT1	0.96	<2.2e-16	0.94	<2.2e-16	0.9	<2.2e-16	0.93	<2.2e-16	0.87	<2.2e-16	0.9	<2.2e-16	0.97	<2.2e-16	0.96	<2.2e-16	0.94	<2.2e-16	0.96	<2.2e-16	0.91	<2.2e-16	0.93	<2.2e-16	NA	NA	NA	NA	NA	NA	NA	NA	NA	NA	NA	NA	NA	NA	NA	NA	NA	NA	NA	NA	NA	NA	NA	NA	NA
STAT2	0.96	<2.2e-16	0.95	<2.2e-16	0.93	<2.2e-16	0.94	<2.2e-16	0.89	<2.2e-16	0.92	<2.2e-16	NA	NA	NA	NA	NA	NA	NA	NA	NA	NA	NA	NA	NA	NA	NA	NA	NA	NA	NA	NA	NA	NA	NA	NA	NA	NA	NA	NA	NA	NA	NA	NA	NA	NA	NA	NA	NA
STAT3	NA	NA	NA	NA	NA	NA	NA	NA	NA	NA	NA	NA	0.97	<2.2e-16	0.96	<2.2e-16	0.94	<2.2e-16	0.96	<2.2e-16	0.92	<2.2e-16	0.93	<2.2e-16	NA	NA	NA	NA	NA	NA	NA	NA	NA	NA	NA	NA	NA	NA	NA	NA	NA	NA	NA	NA	NA	NA	NA	NA	NA
STAT5A	0.87	<2.2e-16	0.87	<2.2e-16	0.81	<2.2e-16	0.86	<2.2e-16	0.81	<2.2e-16	0.83	<2.2e-16	0.95	<2.2e-16	0.96	<2.2e-16	0.95	<2.2e-16	0.96	<2.2e-16	0.92	<2.2e-16	0.94	<2.2e-16	NA	NA	NA	NA	NA	NA	NA	NA	NA	NA	NA	NA	NA	NA	NA	NA	NA	NA	NA	NA	NA	NA	NA	NA	NA
SUZ12	0.83	<2.2e-16	0.88	<2.2e-16	0.81	<2.2e-16	0.85	<2.2e-16	0.81	<2.2e-16	0.84	<2.2e-16	NA	NA	NA	NA	NA	NA	NA	NA	NA	NA	NA	NA	0.92	<2.2e-16	0.89	<2.2e-16	0.81	<2.2e-16	0.86	<2.2e-16	0.8	<2.2e-16	0.8	<2.2e-16	NA	NA	NA	NA	NA	NA	NA	NA	NA	NA	NA	NA	NA
TAF1	0.96	<2.2e-16	0.95	<2.2e-16	0.89	<2.2e-16	0.95	<2.2e-16	0.77	<2.2e-16	0.77	<2.2e-16	0.93	<2.2e-16	0.93	<2.2e-16	0.93	<2.2e-16	0.95	<2.2e-16	0.83	<2.2e-16	0.87	<2.2e-16	0.97	<2.2e-16	0.95	<2.2e-16	0.92	<2.2e-16	0.96	<2.2e-16	0.91	<2.2e-16	0.92	<2.2e-16	NA	NA	NA	NA	NA	NA	NA	NA	NA	NA	NA	NA	NA
TAF7	0.88	<2.2e-16	0.85	<2.2e-16	0.79	<2.2e-16	0.8	<2.2e-16	0.66	<2.2e-16	0.68	<2.2e-16	NA	NA	NA	NA	NA	NA	NA	NA	NA	NA	NA	NA	0.89	<2.2e-16	0.85	<2.2e-16	0.72	<2.2e-16	0.82	<2.2e-16	0.62	<2.2e-16	0.64	<2.2e-16	NA	NA	NA	NA	NA	NA	NA	NA	NA	NA	NA	NA	NA
TAL1	0.96	<2.2e-16	0.95	<2.2e-16	0.95	<2.2e-16	0.96	<2.2e-16	0.93	<2.2e-16	0.94	<2.2e-16	NA	NA	NA	NA	NA	NA	NA	NA	NA	NA	NA	NA	NA	NA	NA	NA	NA	NA	NA	NA	NA	NA	NA	NA	NA	NA	NA	NA	NA	NA	NA	NA	NA	NA	NA	NA	NA
TBL1XR1-TBLR1	0.98	<2.2e-16	0.98	<2.2e-16	0.97	<2.2e-16	0.98	<2.2e-16	0.96	<2.2e-16	0.97	<2.2e-16	0.98	<2.2e-16	0.98	<2.2e-16	0.96	<2.2e-16	0.98	<2.2e-16	0.94	<2.2e-16	0.95	<2.2e-16	NA	NA	NA	NA	NA	NA	NA	NA	NA	NA	NA	NA	NA	NA	NA	NA	NA	NA	NA	NA	NA	NA	NA	NA	NA
TBP	0.97	<2.2e-16	0.96	<2.2e-16	0.97	<2.2e-16	0.97	<2.2e-16	0.94	<2.2e-16	0.96	<2.2e-16	0.96	<2.2e-16	0.96	<2.2e-16	0.94	<2.2e-16	0.95	<2.2e-16	0.91	<2.2e-16	0.93	<2.2e-16	0.96	<2.2e-16	0.96	<2.2e-16	0.95	<2.2e-16	0.96	<2.2e-16	0.92	<2.2e-16	0.94	<2.2e-16	NA	NA	NA	NA	NA	NA	NA	NA	NA	NA	NA	NA	NA
TCF12	NA	NA	NA	NA	NA	NA	NA	NA	NA	NA	NA	NA	0.9	<2.2e-16	0.9	<2.2e-16	0.9	<2.2e-16	0.92	<2.2e-16	0.87	<2.2e-16	0.9	<2.2e-16	0.71	<2.2e-16	0.76	<2.2e-16	0.76	<2.2e-16	0.77	<2.2e-16	0.67	<2.2e-16	0.75	<2.2e-16	NA	NA	NA	NA	NA	NA	NA	NA	NA	NA	NA	NA	NA
TCF3	NA	NA	NA	NA	NA	NA	NA	NA	NA	NA	NA	NA	0.9	<2.2e-16	0.91	<2.2e-16	0.89	<2.2e-16	0.91	<2.2e-16	0.83	<2.2e-16	0.86	<2.2e-16	NA	NA	NA	NA	NA	NA	NA	NA	NA	NA	NA	NA	NA	NA	NA	NA	NA	NA	NA	NA	NA	NA	NA	NA	NA
TEAD4	0.95	<2.2e-16	0.95	<2.2e-16	0.93	<2.2e-16	0.95	<2.2e-16	0.93	<2.2e-16	0.94	<2.2e-16	NA	NA	NA	NA	NA	NA	NA	NA	NA	NA	NA	NA	0.9	<2.2e-16	0.94	<2.2e-16	0.93	<2.2e-16	0.93	<2.2e-16	0.9	<2.2e-16	0.92	<2.2e-16	NA	NA	NA	NA	NA	NA	NA	NA	NA	NA	NA	NA	NA
THAP1	0.79	<2.2e-16	0.81	<2.2e-16	0.77	<2.2e-16	0.8	<2.2e-16	0.63	<2.2e-16	0.64	<2.2e-16	NA	NA	NA	NA	NA	NA	NA	NA	NA	NA	NA	NA	NA	NA	NA	NA	NA	NA	NA	NA	NA	NA	NA	NA	NA	NA	NA	NA	NA	NA	NA	NA	NA	NA	NA	NA	NA
TR4-NR2C2	0.81	<2.2e-16	0.88	<2.2e-16	0.81	<2.2e-16	0.83	<2.2e-16	0.79	<2.2e-16	0.83	<2.2e-16	0.81	<2.2e-16	0.89	<2.2e-16	0.87	<2.2e-16	0.88	<2.2e-16	0.86	<2.2e-16	0.88	<2.2e-16	NA	NA	NA	NA	NA	NA	NA	NA	NA	NA	NA	NA	NA	NA	NA	NA	NA	NA	NA	NA	NA	NA	NA	NA	NA
TRIM28	0.98	<2.2e-16	0.97	<2.2e-16	0.95	<2.2e-16	0.97	<2.2e-16	0.94	<2.2e-16	0.95	<2.2e-16	NA	NA	NA	NA	NA	NA	NA	NA	NA	NA	NA	NA	NA	NA	NA	NA	NA	NA	NA	NA	NA	NA	NA	NA	NA	NA	NA	NA	NA	NA	NA	NA	NA	NA	NA	NA	NA
UBTF	0.94	<2.2e-16	0.95	<2.2e-16	0.95	<2.2e-16	0.96	<2.2e-16	0.94	<2.2e-16	0.95	<2.2e-16	NA	NA	NA	NA	NA	NA	NA	NA	NA	NA	NA	NA	NA	NA	NA	NA	NA	NA	NA	NA	NA	NA	NA	NA	NA	NA	NA	NA	NA	NA	NA	NA	NA	NA	NA	NA	NA
USF1	0.84	<2.2e-16	0.73	<2.2e-16	0.66	<2.2e-16	0.71	<2.2e-16	0.59	<2.2e-16	0.61	<2.2e-16	0.91	<2.2e-16	0.85	<2.2e-16	0.83	<2.2e-16	0.86	<2.2e-16	0.81	<2.2e-16	0.85	<2.2e-16	0.93	<2.2e-16	0.73	<2.2e-16	0.65	<2.2e-16	0.7	<2.2e-16	0.52	<2.2e-16	0.6	<2.2e-16	NA	NA	NA	NA	NA	NA	NA	NA	NA	NA	NA	NA	NA
USF2	0.96	<2.2e-16	0.95	<2.2e-16	0.92	<2.2e-16	0.94	<2.2e-16	0.9	<2.2e-16	0.93	<2.2e-16	0.96	<2.2e-16	0.95	<2.2e-16	0.94	<2.2e-16	0.95	<2.2e-16	0.91	<2.2e-16	0.93	<2.2e-16	0.96	<2.2e-16	0.96	<2.2e-16	0.94	<2.2e-16	0.95	<2.2e-16	0.92	<2.2e-16	0.94	<2.2e-16	NA	NA	NA	NA	NA	NA	NA	NA	NA	NA	NA	NA	NA
WHIP	NA	NA	NA	NA	NA	NA	NA	NA	NA	NA	NA	NA	0.97	<2.2e-16	0.96	<2.2e-16	0.94	<2.2e-16	0.96	<2.2e-16	0.91	<2.2e-16	0.93	<2.2e-16	NA	NA	NA	NA	NA	NA	NA	NA	NA	NA	NA	NA	NA	NA	NA	NA	NA	NA	NA	NA	NA	NA	NA	NA	NA
WHSC1-NSD2	0.95	<2.2e-16	0.96	<2.2e-16	0.96	<2.2e-16	0.95	<2.2e-16	0.94	<2.2e-16	0.95	<2.2e-16	NA	NA	NA	NA	NA	NA	NA	NA	NA	NA	NA	NA	NA	NA	NA	NA	NA	NA	NA	NA	NA	NA	NA	NA	NA	NA	NA	NA	NA	NA	NA	NA	NA	NA	NA	NA	NA
XRCC4	0.9	<2.2e-16	0.91	<2.2e-16	0.85	<2.2e-16	0.88	<2.2e-16	0.82	<2.2e-16	0.86	<2.2e-16	NA	NA	NA	NA	NA	NA	NA	NA	NA	NA	NA	NA	NA	NA	NA	NA	NA	NA	NA	NA	NA	NA	NA	NA	NA	NA	NA	NA	NA	NA	NA	NA	NA	NA	NA	NA	NA
YY1	0.81	<2.2e-16	0.85	<2.2e-16	0.91	<2.2e-16	0.91	<2.2e-16	0.87	<2.2e-16	0.88	<2.2e-16	0.85	<2.2e-16	0.88	<2.2e-16	0.83	<2.2e-16	0.84	<2.2e-16	0.79	<2.2e-16	0.82	<2.2e-16	0.72	<2.2e-16	0.77	<2.2e-16	0.86	<2.2e-16	0.86	<2.2e-16	0.82	<2.2e-16	0.85	<2.2e-16	NA	NA	NA	NA	NA	NA	NA	NA	NA	NA	NA	NA	NA
ZBTB33	0.8	<2.2e-16	0.74	<2.2e-16	0.64	<2.2e-16	0.74	<2.2e-16	0.71	<2.2e-16	0.71	<2.2e-16	0.8	<2.2e-16	0.75	<2.2e-16	0.64	<2.2e-16	0.76	<2.2e-16	0.78	<2.2e-16	0.74	<2.2e-16	NA	NA	NA	NA	NA	NA	NA	NA	NA	NA	NA	NA	NA	NA	NA	NA	NA	NA	NA	NA	NA	NA	NA	NA	NA
ZBTB7A	0.89	<2.2e-16	0.92	<2.2e-16	0.93	<2.2e-16	0.93	<2.2e-16	0.89	<2.2e-16	0.92	<2.2e-16	NA	NA	NA	NA	NA	NA	NA	NA	NA	NA	NA	NA	NA	NA	NA	NA	NA	NA	NA	NA	NA	NA	NA	NA	NA	NA	NA	NA	NA	NA	NA	NA	NA	NA	NA	NA	NA
ZC3H11A	0.98	<2.2e-16	0.98	<2.2e-16	0.96	<2.2e-16	0.97	<2.2e-16	0.95	<2.2e-16	0.96	<2.2e-16	NA	NA	NA	NA	NA	NA	NA	NA	NA	NA	NA	NA	NA	NA	NA	NA	NA	NA	NA	NA	NA	NA	NA	NA	NA	NA	NA	NA	NA	NA	NA	NA	NA	NA	NA	NA	NA
ZEB1	NA	NA	NA	NA	NA	NA	NA	NA	NA	NA	NA	NA	0.78	<2.2e-16	0.85	<2.2e-16	0.84	<2.2e-16	0.87	<2.2e-16	0.71	<2.2e-16	0.77	<2.2e-16	NA	NA	NA	NA	NA	NA	NA	NA	NA	NA	NA	NA	NA	NA	NA	NA	NA	NA	NA	NA	NA	NA	NA	NA	NA
ZMIZ1	0.99	<2.2e-16	0.98	<2.2e-16	0.97	<2.2e-16	0.98	<2.2e-16	0.95	<2.2e-16	0.97	<2.2e-16	NA	NA	NA	NA	NA	NA	NA	NA	NA	NA	NA	NA	NA	NA	NA	NA	NA	NA	NA	NA	NA	NA	NA	NA	NA	NA	NA	NA	NA	NA	NA	NA	NA	NA	NA	NA	NA
ZNF143	0.89	<2.2e-16	0.94	<2.2e-16	0.96	<2.2e-16	0.96	<2.2e-16	0.94	<2.2e-16	0.95	<2.2e-16	0.87	<2.2e-16	0.88	<2.2e-16	0.96	<2.2e-16	0.95	<2.2e-16	0.92	<2.2e-16	0.94	<2.2e-16	0.88	<2.2e-16	0.92	<2.2e-16	0.94	<2.2e-16	0.94	<2.2e-16	0.92	<2.2e-16	0.93	<2.2e-16	NA	NA	NA	NA	NA	NA	NA	NA	NA	NA	NA	NA	NA
ZNF263	0.88	<2.2e-16	0.94	<2.2e-16	0.93	<2.2e-16	0.92	<2.2e-16	0.89	<2.2e-16	0.91	<2.2e-16	NA	NA	NA	NA	NA	NA	NA	NA	NA	NA	NA	NA	NA	NA	NA	NA	NA	NA	NA	NA	NA	NA	NA	NA	NA	NA	NA	NA	NA	NA	NA	NA	NA	NA	NA	NA	NA
ZNF274	0.82	<2.2e-16	0.9	<2.2e-16	0.83	<2.2e-16	0.84	<2.2e-16	0.81	<2.2e-16	0.84	<2.2e-16	0.77	<2.2e-16	0.82	<2.2e-16	0.79	<2.2e-16	0.76	<2.2e-16	0.74	<2.2e-16	0.75	<2.2e-16	0.59	<2.2e-16	0.72	<2.2e-16	0.63	<2.2e-16	0.72	<2.2e-16	0.67	<2.2e-16	0.72	<2.2e-16	NA	NA	NA	NA	NA	NA	NA	NA	NA	NA	NA	NA	NA
ZNF384	0.88	<2.2e-16	0.93	<2.2e-16	0.9	<2.2e-16	0.94	<2.2e-16	0.92	<2.2e-16	0.93	<2.2e-16	0.87	<2.2e-16	0.9	<2.2e-16	0.87	<2.2e-16	0.92	<2.2e-16	0.88	<2.2e-16	0.89	<2.2e-16	NA	NA	NA	NA	NA	NA	NA	NA	NA	NA	NA	NA	NA	NA	NA	NA	NA	NA	NA	NA	NA	NA	NA	NA	NA
ZZZ3	NA	NA	NA	NA	NA	NA	NA	NA	NA	NA	NA	NA	0.8	<2.2e-16	0.89	<2.2e-16	0.82	<2.2e-16	0.82	<2.2e-16	0.78	<2.2e-16	0.8	<2.2e-16	NA	NA	NA	NA	NA	NA	NA	NA	NA	NA	NA	NA	NA	NA	NA	NA	NA	NA	NA	NA	NA	NA	NA	NA	NA
[truncated: 11 more columns]

## Sheet: Table D
Mark	Cell line	Position	Feature	Pearson's r for ARID3A	p values for ARID3A	Pearson's r for ATF1	p values for ATF1	Pearson's r for ATF2	p values for ATF2	Pearson's r for ATF3	p values for ATF3	Pearson's r for BACH1	p values for BACH1	Pearson's r for BATF	p values for BATF	Pearson's r for BCL11A	p values for BCL11A	Pearson's r for BCL3	p values for BCL3	Pearson's r for BCLAF1	p values for BCLAF1	Pearson's r for BDP1	p values for BDP1	Pearson's r for BHLHE40	p values for BHLHE40	Pearson's r for BRCA1	p values for BRCA1	Pearson's r for BRF1	p values for BRF1	Pearson's r for BRF2	p values for BRF2	Pearson's r for CBX2	p values for CBX2	Pearson's r for CBX3	p values for CBX3	Pearson's r for CBX8	p values for CBX8	Pearson's r for CCNT2	p values for CCNT2	Pearson's r for CEBPB	p values for CEBPB	Pearson's r for CEBPD	p values for CEBPD	Pearson's r for CHD1	p values for CHD1	Pearson's r for CHD2	p values for CHD2	Pearson's r for CHD4	p values for CHD4
ARID3A	K562	TSS	protein coding	NA	NA	0.63	<2.2e-16	NA	NA	0.66	<2.2e-16	0.87	<2.2e-16	NA	NA	NA	NA	NA	NA	0.63	<2.2e-16	0.84	<2.2e-16	0.62	<2.2e-16	NA	NA	0.78	<2.2e-16	0.85	<2.2e-16	-0.05	2e-11	0.78	<2.2e-16	-0.08	<2.2e-16	0.72	<2.2e-16	0.65	<2.2e-16	0.85	<2.2e-16	0.79	<2.2e-16	0.43	<2.2e-16	0.62	<2.2e-16
ATF1	K562	TSS	protein coding	0.63	<2.2e-16	NA	NA	NA	NA	0.59	<2.2e-16	0.62	<2.2e-16	NA	NA	NA	NA	NA	NA	0.47	<2.2e-16	0.6	<2.2e-16	0.5	<2.2e-16	NA	NA	0.56	<2.2e-16	0.64	<2.2e-16	-0.05	4e-14	0.61	<2.2e-16	-0.09	<2.2e-16	0.49	<2.2e-16	0.53	<2.2e-16	0.63	<2.2e-16	0.56	<2.2e-16	0.33	<2.2e-16	0.4	<2.2e-16
ATF3	K562	TSS	protein coding	0.66	<2.2e-16	0.59	<2.2e-16	NA	NA	NA	NA	0.62	<2.2e-16	NA	NA	NA	NA	NA	NA	0.55	<2.2e-16	0.6	<2.2e-16	0.52	<2.2e-16	NA	NA	0.54	<2.2e-16	0.6	<2.2e-16	-0.06	2e-15	0.65	<2.2e-16	-0.09	<2.2e-16	0.55	<2.2e-16	0.66	<2.2e-16	0.67	<2.2e-16	0.58	<2.2e-16	0.31	<2.2e-16	0.47	<2.2e-16
BACH1	K562	TSS	protein coding	0.87	<2.2e-16	0.62	<2.2e-16	NA	NA	0.62	<2.2e-16	NA	NA	NA	NA	NA	NA	NA	NA	0.63	<2.2e-16	0.84	<2.2e-16	0.63	<2.2e-16	NA	NA	0.8	<2.2e-16	0.87	<2.2e-16	-0.01	0.05	0.76	<2.2e-16	-0.06	<2.2e-16	0.73	<2.2e-16	0.58	<2.2e-16	0.85	<2.2e-16	0.77	<2.2e-16	0.41	<2.2e-16	0.62	<2.2e-16
BCLAF1	K562	TSS	protein coding	0.63	<2.2e-16	0.47	<2.2e-16	NA	NA	0.55	<2.2e-16	0.63	<2.2e-16	NA	NA	NA	NA	NA	NA	NA	NA	0.55	<2.2e-16	0.48	<2.2e-16	NA	NA	0.5	<2.2e-16	0.58	<2.2e-16	-0.06	4e-15	0.69	<2.2e-16	-0.09	<2.2e-16	0.58	<2.2e-16	0.54	<2.2e-16	0.65	<2.2e-16	0.65	<2.2e-16	0.33	<2.2e-16	0.44	<2.2e-16
BDP1	K562	TSS	protein coding	0.84	<2.2e-16	0.6	<2.2e-16	NA	NA	0.6	<2.2e-16	0.84	<2.2e-16	NA	NA	NA	NA	NA	NA	0.55	<2.2e-16	NA	NA	0.56	<2.2e-16	NA	NA	0.86	<2.2e-16	0.91	<2.2e-16	-0.02	3	0.72	<2.2e-16	-0.06	<2.2e-16	0.61	<2.2e-16	0.55	<2.2e-16	0.77	<2.2e-16	0.68	<2.2e-16	0.37	<2.2e-16	0.57	<2.2e-16
BHLHE40	K562	TSS	protein coding	0.62	<2.2e-16	0.5	<2.2e-16	NA	NA	0.52	<2.2e-16	0.63	<2.2e-16	NA	NA	NA	NA	NA	NA	0.48	<2.2e-16	0.56	<2.2e-16	NA	NA	NA	NA	0.53	<2.2e-16	0.62	<2.2e-16	-0.05	9e-13	0.65	<2.2e-16	-0.08	<2.2e-16	0.67	<2.2e-16	0.46	<2.2e-16	0.67	<2.2e-16	0.6	<2.2e-16	0.34	<2.2e-16	0.51	<2.2e-16
BRF1	K562	TSS	protein coding	0.78	<2.2e-16	0.56	<2.2e-16	NA	NA	0.54	<2.2e-16	0.8	<2.2e-16	NA	NA	NA	NA	NA	NA	0.5	<2.2e-16	0.86	<2.2e-16	0.53	<2.2e-16	NA	NA	NA	NA	0.86	<2.2e-16	0.01	0.2	0.65	<2.2e-16	-0.03	3e-06	0.59	<2.2e-16	0.48	<2.2e-16	0.73	<2.2e-16	0.63	<2.2e-16	0.34	<2.2e-16	0.55	<2.2e-16
BRF2	K562	TSS	protein coding	0.85	<2.2e-16	0.64	<2.2e-16	NA	NA	0.6	<2.2e-16	0.87	<2.2e-16	NA	NA	NA	NA	NA	NA	0.58	<2.2e-16	0.91	<2.2e-16	0.62	<2.2e-16	NA	NA	0.86	<2.2e-16	NA	NA	-0.03	2e-06	0.76	<2.2e-16	-0.08	<2.2e-16	0.69	<2.2e-16	0.56	<2.2e-16	0.83	<2.2e-16	0.73	<2.2e-16	0.4	<2.2e-16	0.63	<2.2e-16
CBX2	K562	TSS	protein coding	-0.05	2e-11	-0.05	4e-14	NA	NA	-0.06	2e-15	-0.01	0.05	NA	NA	NA	NA	NA	NA	-0.06	4e-15	-0.02	3	-0.05	9e-13	NA	NA	0.01	0.2	-0.03	2e-06	NA	NA	-0.09	<2.2e-16	0.93	<2.2e-16	-0.07	<2.2e-16	-0.05	7e-11	-0.08	<2.2e-16	-0.05	7e-13	-0.05	3e-14	0.03	0.0002
CBX3	K562	TSS	protein coding	0.78	<2.2e-16	0.61	<2.2e-16	NA	NA	0.65	<2.2e-16	0.76	<2.2e-16	NA	NA	NA	NA	NA	NA	0.69	<2.2e-16	0.72	<2.2e-16	0.65	<2.2e-16	NA	NA	0.65	<2.2e-16	0.76	<2.2e-16	-0.09	<2.2e-16	NA	NA	-0.13	<2.2e-16	0.7	<2.2e-16	0.64	<2.2e-16	0.81	<2.2e-16	0.75	<2.2e-16	0.41	<2.2e-16	0.67	<2.2e-16
CBX8	K562	TSS	protein coding	-0.08	<2.2e-16	-0.09	<2.2e-16	NA	NA	-0.09	<2.2e-16	-0.06	<2.2e-16	NA	NA	NA	NA	NA	NA	-0.09	<2.2e-16	-0.06	<2.2e-16	-0.08	<2.2e-16	NA	NA	-0.03	3e-06	-0.08	<2.2e-16	0.93	<2.2e-16	-0.13	<2.2e-16	NA	NA	-0.1	<2.2e-16	-0.07	<2.2e-16	-0.12	<2.2e-16	-0.09	<2.2e-16	-0.08	<2.2e-16	0	0.8
CCNT2	K562	TSS	protein coding	0.72	<2.2e-16	0.49	<2.2e-16	NA	NA	0.55	<2.2e-16	0.73	<2.2e-16	NA	NA	NA	NA	NA	NA	0.58	<2.2e-16	0.61	<2.2e-16	0.67	<2.2e-16	NA	NA	0.59	<2.2e-16	0.69	<2.2e-16	-0.07	<2.2e-16	0.7	<2.2e-16	-0.1	<2.2e-16	NA	NA	0.49	<2.2e-16	0.84	<2.2e-16	0.79	<2.2e-16	0.37	<2.2e-16	0.67	<2.2e-16
CEBPB	K562	TSS	protein coding	0.65	<2.2e-16	0.53	<2.2e-16	NA	NA	0.66	<2.2e-16	0.58	<2.2e-16	NA	NA	NA	NA	NA	NA	0.54	<2.2e-16	0.55	<2.2e-16	0.46	<2.2e-16	NA	NA	0.48	<2.2e-16	0.56	<2.2e-16	-0.05	7e-11	0.64	<2.2e-16	-0.07	<2.2e-16	0.49	<2.2e-16	NA	NA	0.67	<2.2e-16	0.6	<2.2e-16	0.3	<2.2e-16	0.44	<2.2e-16
CEBPD	K562	TSS	protein coding	0.85	<2.2e-16	0.63	<2.2e-16	NA	NA	0.67	<2.2e-16	0.85	<2.2e-16	NA	NA	NA	NA	NA	NA	0.65	<2.2e-16	0.77	<2.2e-16	0.67	<2.2e-16	NA	NA	0.73	<2.2e-16	0.83	<2.2e-16	-0.08	<2.2e-16	0.81	<2.2e-16	-0.12	<2.2e-16	0.84	<2.2e-16	0.67	<2.2e-16	NA	NA	0.82	<2.2e-16	0.43	<2.2e-16	0.69	<2.2e-16
CHD1	K562	TSS	protein coding	0.79	<2.2e-16	0.56	<2.2e-16	NA	NA	0.58	<2.2e-16	0.77	<2.2e-16	NA	NA	NA	NA	NA	NA	0.65	<2.2e-16	0.68	<2.2e-16	0.6	<2.2e-16	NA	NA	0.63	<2.2e-16	0.73	<2.2e-16	-0.05	7e-13	0.75	<2.2e-16	-0.09	<2.2e-16	0.79	<2.2e-16	0.6	<2.2e-16	0.82	<2.2e-16	NA	NA	0.43	<2.2e-16	0.67	<2.2e-16
CHD2	K562	TSS	protein coding	0.43	<2.2e-16	0.33	<2.2e-16	NA	NA	0.31	<2.2e-16	0.41	<2.2e-16	NA	NA	NA	NA	NA	NA	0.33	<2.2e-16	0.37	<2.2e-16	0.34	<2.2e-16	NA	NA	0.34	<2.2e-16	0.4	<2.2e-16	-0.05	3e-14	0.41	<2.2e-16	-0.08	<2.2e-16	0.37	<2.2e-16	0.3	<2.2e-16	0.43	<2.2e-16	0.43	<2.2e-16	NA	NA	0.29	<2.2e-16
CHD4	K562	TSS	protein coding	0.62	<2.2e-16	0.4	<2.2e-16	NA	NA	0.47	<2.2e-16	0.62	<2.2e-16	NA	NA	NA	NA	NA	NA	0.44	<2.2e-16	0.57	<2.2e-16	0.51	<2.2e-16	NA	NA	0.55	<2.2e-16	0.63	<2.2e-16	0.03	0.0002	0.67	<2.2e-16	0	0.8	0.67	<2.2e-16	0.44	<2.2e-16	0.69	<2.2e-16	0.67	<2.2e-16	0.29	<2.2e-16	NA	NA
CHD7	K562	TSS	protein coding	0.68	<2.2e-16	0.51	<2.2e-16	NA	NA	0.53	<2.2e-16	0.72	<2.2e-16	NA	NA	NA	NA	NA	NA	0.6	<2.2e-16	0.63	<2.2e-16	0.56	<2.2e-16	NA	NA	0.62	<2.2e-16	0.69	<2.2e-16	0.04	2e-06	0.71	<2.2e-16	-0.01	0.06	0.71	<2.2e-16	0.53	<2.2e-16	0.77	<2.2e-16	0.78	<2.2e-16	0.37	<2.2e-16	0.71	<2.2e-16
COREST-RCOR1	K562	TSS	protein coding	0.87	<2.2e-16	0.63	<2.2e-16	NA	NA	0.64	<2.2e-16	0.88	<2.2e-16	NA	NA	NA	NA	NA	NA	0.61	<2.2e-16	0.82	<2.2e-16	0.68	<2.2e-16	NA	NA	0.79	<2.2e-16	0.87	<2.2e-16	-0.04	4e-08	0.81	<2.2e-16	-0.09	<2.2e-16	0.81	<2.2e-16	0.58	<2.2e-16	0.92	<2.2e-16	0.78	<2.2e-16	0.42	<2.2e-16	0.72	<2.2e-16
CREB1	K562	TSS	protein coding	0.59	<2.2e-16	0.9	<2.2e-16	NA	NA	0.54	<2.2e-16	0.58	<2.2e-16	NA	NA	NA	NA	NA	NA	0.49	<2.2e-16	0.54	<2.2e-16	0.48	<2.2e-16	NA	NA	0.49	<2.2e-16	0.59	<2.2e-16	-0.06	<2.2e-16	0.63	<2.2e-16	-0.1	<2.2e-16	0.51	<2.2e-16	0.52	<2.2e-16	0.61	<2.2e-16	0.58	<2.2e-16	0.31	<2.2e-16	0.41	<2.2e-16
CREBBP	K562	TSS	protein coding	0.55	<2.2e-16	0.42	<2.2e-16	NA	NA	0.4	<2.2e-16	0.59	<2.2e-16	NA	NA	NA	NA	NA	NA	0.41	<2.2e-16	0.58	<2.2e-16	0.41	<2.2e-16	NA	NA	0.59	<2.2e-16	0.6	<2.2e-16	0.11	<2.2e-16	0.53	<2.2e-16	0.06	<2.2e-16	0.43	<2.2e-16	0.39	<2.2e-16	0.56	<2.2e-16	0.53	<2.2e-16	0.26	<2.2e-16	0.56	<2.2e-16
CTCF	K562	TSS	protein coding	0.37	<2.2e-16	0.25	<2.2e-16	NA	NA	0.29	<2.2e-16	0.37	<2.2e-16	NA	NA	NA	NA	NA	NA	0.29	<2.2e-16	0.32	<2.2e-16	0.3	<2.2e-16	NA	NA	0.32	<2.2e-16	0.37	<2.2e-16	-0.01	0.5	0.4	<2.2e-16	-0.03	3e-05	0.38	<2.2e-16	0.25	<2.2e-16	0.39	<2.2e-16	0.3	<2.2e-16	0.16	<2.2e-16	0.36	<2.2e-16
CTCFL	K562	TSS	protein coding	0.5	<2.2e-16	0.37	<2.2e-16	NA	NA	0.4	<2.2e-16	0.53	<2.2e-16	NA	NA	NA	NA	NA	NA	0.46	<2.2e-16	0.45	<2.2e-16	0.45	<2.2e-16	NA	NA	0.45	<2.2e-16	0.51	<2.2e-16	-0.02	0.0008	0.55	<2.2e-16	-0.06	4e-15	0.6	<2.2e-16	0.35	<2.2e-16	0.57	<2.2e-16	0.5	<2.2e-16	0.29	<2.2e-16	0.48	<2.2e-16
CUX1	K562	TSS	protein coding	0.92	<2.2e-16	0.64	<2.2e-16	NA	NA	0.64	<2.2e-16	0.89	<2.2e-16	NA	NA	NA	NA	NA	NA	0.61	<2.2e-16	0.87	<2.2e-16	0.62	<2.2e-16	NA	NA	0.83	<2.2e-16	0.88	<2.2e-16	-0.03	6e-06	0.77	<2.2e-16	-0.07	<2.2e-16	0.71	<2.2e-16	0.61	<2.2e-16	0.85	<2.2e-16	0.76	<2.2e-16	0.4	<2.2e-16	0.63	<2.2e-16
E2F4	K562	TSS	protein coding	0.68	<2.2e-16	0.57	<2.2e-16	NA	NA	0.54	<2.2e-16	0.7	<2.2e-16	NA	NA	NA	NA	NA	NA	0.57	<2.2e-16	0.62	<2.2e-16	0.61	<2.2e-16	NA	NA	0.58	<2.2e-16	0.68	<2.2e-16	-0.08	<2.2e-16	0.73	<2.2e-16	-0.11	<2.2e-16	0.76	<2.2e-16	0.49	<2.2e-16	0.76	<2.2e-16	0.72	<2.2e-16	0.42	<2.2e-16	0.58	<2.2e-16
E2F6	K562	TSS	protein coding	0.53	<2.2e-16	0.4	<2.2e-16	NA	NA	0.41	<2.2e-16	0.57	<2.2e-16	NA	NA	NA	NA	NA	NA	0.45	<2.2e-16	0.48	<2.2e-16	0.59	<2.2e-16	NA	NA	0.46	<2.2e-16	0.54	<2.2e-16	-0.05	3e-10	0.7	<2.2e-16	-0.07	<2.2e-16	0.64	<2.2e-16	0.37	<2.2e-16	0.6	<2.2e-16	0.56	<2.2e-16	0.32	<2.2e-16	0.49	<2.2e-16
EGFP-HDAC8	K562	TSS	protein coding	0.65	<2.2e-16	0.53	<2.2e-16	NA	NA	0.52	<2.2e-16	0.7	<2.2e-16	NA	NA	NA	NA	NA	NA	0.5	<2.2e-16	0.62	<2.2e-16	0.59	<2.2e-16	NA	NA	0.61	<2.2e-16	0.71	<2.2e-16	-0.07	<2.2e-16	0.7	<2.2e-16	-0.12	<2.2e-16	0.72	<2.2e-16	0.46	<2.2e-16	0.8	<2.2e-16	0.7	<2.2e-16	0.37	<2.2e-16	0.67	<2.2e-16
EGFP-JUNB	K562	TSS	protein coding	0.75	<2.2e-16	0.6	<2.2e-16	NA	NA	0.73	<2.2e-16	0.74	<2.2e-16	NA	NA	NA	NA	NA	NA	0.58	<2.2e-16	0.66	<2.2e-16	0.64	<2.2e-16	NA	NA	0.62	<2.2e-16	0.73	<2.2e-16	-0.08	<2.2e-16	0.76	<2.2e-16	-0.11	<2.2e-16	0.74	<2.2e-16	0.58	<2.2e-16	0.83	<2.2e-16	0.73	<2.2e-16	0.38	<2.2e-16	0.64	<2.2e-16
EGFP-NR4A1	K562	TSS	protein coding	0.17	<2.2e-16	0.16	<2.2e-16	NA	NA	0.2	<2.2e-16	0.26	<2.2e-16	NA	NA	NA	NA	NA	NA	0.17	<2.2e-16	0.2	<2.2e-16	0.28	<2.2e-16	NA	NA	0.24	<2.2e-16	0.28	<2.2e-16	0.01	0.2	0.28	<2.2e-16	-0.03	0.0003	0.38	<2.2e-16	0.13	<2.2e-16	0.38	<2.2e-16	0.27	<2.2e-16	0.11	<2.2e-16	0.37	<2.2e-16
EGR1	K562	TSS	protein coding	0.52	<2.2e-16	0.38	<2.2e-16	NA	NA	0.42	<2.2e-16	0.53	<2.2e-16	NA	NA	NA	NA	NA	NA	0.43	<2.2e-16	0.43	<2.2e-16	0.5	<2.2e-16	NA	NA	0.41	<2.2e-16	0.49	<2.2e-16	-0.04	7e-09	0.54	<2.2e-16	-0.07	<2.2e-16	0.68	<2.2e-16	0.35	<2.2e-16	0.62	<2.2e-16	0.55	<2.2e-16	0.29	<2.2e-16	0.52	<2.2e-16
ELF1	K562	TSS	protein coding	0.5	<2.2e-16	0.49	<2.2e-16	NA	NA	0.41	<2.2e-16	0.49	<2.2e-16	NA	NA	NA	NA	NA	NA	0.46	<2.2e-16	0.48	<2.2e-16	0.43	<2.2e-16	NA	NA	0.44	<2.2e-16	0.52	<2.2e-16	-0.1	<2.2e-16	0.55	<2.2e-16	-0.13	<2.2e-16	0.42	<2.2e-16	0.4	<2.2e-16	0.54	<2.2e-16	0.49	<2.2e-16	0.3	<2.2e-16	0.35	<2.2e-16
ELK1	K562	TSS	protein coding	0.84	<2.2e-16	0.67	<2.2e-16	NA	NA	0.62	<2.2e-16	0.86	<2.2e-16	NA	NA	NA	NA	NA	NA	0.68	<2.2e-16	0.82	<2.2e-16	0.65	<2.2e-16	NA	NA	0.77	<2.2e-16	0.86	<2.2e-16	-0.05	2e-13	0.79	<2.2e-16	-0.1	<2.2e-16	0.74	<2.2e-16	0.59	<2.2e-16	0.87	<2.2e-16	0.79	<2.2e-16	0.44	<2.2e-16	0.62	<2.2e-16
ETS1	K562	TSS	protein coding	0.67	<2.2e-16	0.57	<2.2e-16	NA	NA	0.57	<2.2e-16	0.71	<2.2e-16	NA	NA	NA	NA	NA	NA	0.65	<2.2e-16	0.62	<2.2e-16	0.63	<2.2e-16	NA	NA	0.59	<2.2e-16	0.7	<2.2e-16	-0.09	<2.2e-16	0.75	<2.2e-16	-0.13	<2.2e-16	0.78	<2.2e-16	0.5	<2.2e-16	0.79	<2.2e-16	0.73	<2.2e-16	0.38	<2.2e-16	0.6	<2.2e-16
EZH2	K562	TSS	protein coding	0.25	<2.2e-16	0.18	<2.2e-16	NA	NA	0.17	<2.2e-16	0.29	<2.2e-16	NA	NA	NA	NA	NA	NA	0.17	<2.2e-16	0.27	<2.2e-16	0.16	<2.2e-16	NA	NA	0.3	<2.2e-16	0.27	<2.2e-16	0.71	<2.2e-16	0.2	<2.2e-16	0.65	<2.2e-16	0.13	<2.2e-16	0.18	<2.2e-16	0.22	<2.2e-16	0.21	<2.2e-16	0.09	<2.2e-16	0.23	<2.2e-16
FOSL1	K562	TSS	protein coding	0.59	<2.2e-16	0.47	<2.2e-16	NA	NA	0.66	<2.2e-16	0.6	<2.2e-16	NA	NA	NA	NA	NA	NA	0.49	<2.2e-16	0.55	<2.2e-16	0.5	<2.2e-16	NA	NA	0.52	<2.2e-16	0.59	<2.2e-16	-0.03	0.0004	0.61	<2.2e-16	-0.06	<2.2e-16	0.54	<2.2e-16	0.47	<2.2e-16	0.64	<2.2e-16	0.54	<2.2e-16	0.29	<2.2e-16	0.5	<2.2e-16
GABP	K562	TSS	protein coding	0.3	<2.2e-16	0.31	<2.2e-16	NA	NA	0.26	<2.2e-16	0.3	<2.2e-16	NA	NA	NA	NA	NA	NA	0.5	<2.2e-16	0.31	<2.2e-16	0.23	<2.2e-16	NA	NA	0.28	<2.2e-16	0.33	<2.2e-16	-0.09	<2.2e-16	0.37	<2.2e-16	-0.11	<2.2e-16	0.21	<2.2e-16	0.24	<2.2e-16	0.34	<2.2e-16	0.29	<2.2e-16	0.16	<2.2e-16	0.17	<2.2e-16
GATA1	K562	TSS	protein coding	0.9	<2.2e-16	0.65	<2.2e-16	NA	NA	0.65	<2.2e-16	0.87	<2.2e-16	NA	NA	NA	NA	NA	NA	0.61	<2.2e-16	0.85	<2.2e-16	0.65	<2.2e-16	NA	NA	0.79	<2.2e-16	0.88	<2.2e-16	-0.05	9e-11	0.79	<2.2e-16	-0.09	<2.2e-16	0.77	<2.2e-16	0.63	<2.2e-16	0.91	<2.2e-16	0.79	<2.2e-16	0.42	<2.2e-16	0.66	<2.2e-16
GTF2B	K562	TSS	protein coding	0.81	<2.2e-16	0.61	<2.2e-16	NA	NA	0.61	<2.2e-16	0.81	<2.2e-16	NA	NA	NA	NA	NA	NA	0.68	<2.2e-16	0.75	<2.2e-16	0.58	<2.2e-16	NA	NA	0.69	<2.2e-16	0.79	<2.2e-16	-0.08	<2.2e-16	0.76	<2.2e-16	-0.12	<2.2e-16	0.69	<2.2e-16	0.61	<2.2e-16	0.82	<2.2e-16	0.83	<2.2e-16	0.45	<2.2e-16	0.57	<2.2e-16
GTF2F1	K562	TSS	protein coding	0.86	<2.2e-16	0.66	<2.2e-16	NA	NA	0.64	<2.2e-16	0.89	<2.2e-16	NA	NA	NA	NA	NA	NA	0.7	<2.2e-16	0.81	<2.2e-16	0.67	<2.2e-16	NA	NA	0.77	<2.2e-16	0.86	<2.2e-16	-0.05	2e-13	0.82	<2.2e-16	-0.1	<2.2e-16	0.79	<2.2e-16	0.61	<2.2e-16	0.89	<2.2e-16	0.86	<2.2e-16	0.47	<2.2e-16	0.65	<2.2e-16
GTF3C2	K562	TSS	protein coding	0.63	<2.2e-16	0.46	<2.2e-16	NA	NA	0.54	<2.2e-16	0.61	<2.2e-16	NA	NA	NA	NA	NA	NA	0.48	<2.2e-16	0.63	<2.2e-16	0.51	<2.2e-16	NA	NA	0.56	<2.2e-16	0.64	<2.2e-16	-0.07	<2.2e-16	0.64	<2.2e-16	-0.1	<2.2e-16	0.61	<2.2e-16	0.46	<2.2e-16	0.66	<2.2e-16	0.59	<2.2e-16	0.31	<2.2e-16	0.58	<2.2e-16
H2AZ	K562	TSS	protein coding	0.76	<2.2e-16	0.53	<2.2e-16	NA	NA	0.5	<2.2e-16	0.72	<2.2e-16	NA	NA	NA	NA	NA	NA	0.46	<2.2e-16	0.72	<2.2e-16	0.56	<2.2e-16	NA	NA	0.67	<2.2e-16	0.75	<2.2e-16	-0.05	4e-14	0.75	<2.2e-16	-0.08	<2.2e-16	0.59	<2.2e-16	0.49	<2.2e-16	0.69	<2.2e-16	0.61	<2.2e-16	0.35	<2.2e-16	0.62	<2.2e-16
H3K27AC	K562	TSS	protein coding	0.77	<2.2e-16	0.61	<2.2e-16	NA	NA	0.63	<2.2e-16	0.73	<2.2e-16	NA	NA	NA	NA	NA	NA	0.64	<2.2e-16	0.66	<2.2e-16	0.6	<2.2e-16	NA	NA	0.59	<2.2e-16	0.7	<2.2e-16	-0.14	<2.2e-16	0.78	<2.2e-16	-0.17	<2.2e-16	0.66	<2.2e-16	0.65	<2.2e-16	0.78	<2.2e-16	0.85	<2.2e-16	0.44	<2.2e-16	0.55	<2.2e-16
H3K27ME3	K562	TSS	protein coding	-0.28	<2.2e-16	-0.18	<2.2e-16	NA	NA	-0.2	<2.2e-16	-0.2	<2.2e-16	NA	NA	NA	NA	NA	NA	-0.19	<2.2e-16	-0.21	<2.2e-16	-0.2	<2.2e-16	NA	NA	-0.14	<2.2e-16	-0.22	<2.2e-16	0.58	<2.2e-16	-0.3	<2.2e-16	0.53	<2.2e-16	-0.26	<2.2e-16	-0.21	<2.2e-16	-0.25	<2.2e-16	-0.27	<2.2e-16	-0.15	<2.2e-16	-0.22	<2.2e-16
H3K36ME3	K562	TSS	protein coding	0.58	<2.2e-16	0.47	<2.2e-16	NA	NA	0.43	<2.2e-16	0.61	<2.2e-16	NA	NA	NA	NA	NA	NA	0.48	<2.2e-16	0.63	<2.2e-16	0.42	<2.2e-16	NA	NA	0.58	<2.2e-16	0.64	<2.2e-16	-0.13	<2.2e-16	0.57	<2.2e-16	-0.16	<2.2e-16	0.46	<2.2e-16	0.44	<2.2e-16	0.59	<2.2e-16	0.62	<2.2e-16	0.33	<2.2e-16	0.43	<2.2e-16
H3K4ME1	K562	TSS	protein coding	0.6	<2.2e-16	0.43	<2.2e-16	NA	NA	0.45	<2.2e-16	0.63	<2.2e-16	NA	NA	NA	NA	NA	NA	0.35	<2.2e-16	0.64	<2.2e-16	0.51	<2.2e-16	NA	NA	0.63	<2.2e-16	0.69	<2.2e-16	-0.05	2e-13	0.61	<2.2e-16	-0.08	<2.2e-16	0.58	<2.2e-16	0.4	<2.2e-16	0.69	<2.2e-16	0.53	<2.2e-16	0.27	<2.2e-16	0.68	<2.2e-16
H3K4ME2	K562	TSS	protein coding	0.8	<2.2e-16	0.64	<2.2e-16	NA	NA	0.59	<2.2e-16	0.78	<2.2e-16	NA	NA	NA	NA	NA	NA	0.61	<2.2e-16	0.75	<2.2e-16	0.63	<2.2e-16	NA	NA	0.68	<2.2e-16	0.8	<2.2e-16	-0.12	<2.2e-16	0.81	<2.2e-16	-0.16	<2.2e-16	0.72	<2.2e-16	0.59	<2.2e-16	0.83	<2.2e-16	0.86	<2.2e-16	0.44	<2.2e-16	0.64	<2.2e-16
H3K4ME3	K562	TSS	protein coding	0.82	<2.2e-16	0.64	<2.2e-16	NA	NA	0.59	<2.2e-16	0.78	<2.2e-16	NA	NA	NA	NA	NA	NA	0.63	<2.2e-16	0.74	<2.2e-16	0.61	<2.2e-16	NA	NA	0.67	<2.2e-16	0.78	<2.2e-16	-0.12	<2.2e-16	0.8	<2.2e-16	-0.16	<2.2e-16	0.7	<2.2e-16	0.61	<2.2e-16	0.81	<2.2e-16	0.87	<2.2e-16	0.45	<2.2e-16	0.61	<2.2e-16
H3K79ME2	K562	TSS	protein coding	0.65	<2.2e-16	0.5	<2.2e-16	NA	NA	0.47	<2.2e-16	0.63	<2.2e-16	NA	NA	NA	NA	NA	NA	0.56	<2.2e-16	0.59	<2.2e-16	0.48	<2.2e-16	NA	NA	0.53	<2.2e-16	0.63	<2.2e-16	-0.14	<2.2e-16	0.62	<2.2e-16	-0.17	<2.2e-16	0.57	<2.2e-16	0.5	<2.2e-16	0.65	<2.2e-16	0.81	<2.2e-16	0.41	<2.2e-16	0.44	<2.2e-16
H3K9AC	K562	TSS	protein coding	0.79	<2.2e-16	0.62	<2.2e-16	NA	NA	0.61	<2.2e-16	0.76	<2.2e-16	NA	NA	NA	NA	NA	NA	0.67	<2.2e-16	0.69	<2.2e-16	0.59	<2.2e-16	NA	NA	0.62	<2.2e-16	0.73	<2.2e-16	-0.13	<2.2e-16	0.77	<2.2e-16	-0.17	<2.2e-16	0.68	<2.2e-16	0.63	<2.2e-16	0.79	<2.2e-16	0.89	<2.2e-16	0.46	<2.2e-16	0.56	<2.2e-16
H3K9ME1	K562	TSS	protein coding	0.53	<2.2e-16	0.42	<2.2e-16	NA	NA	0.39	<2.2e-16	0.61	<2.2e-16	NA	NA	NA	NA	NA	NA	0.36	<2.2e-16	0.62	<2.2e-16	0.42	<2.2e-16	NA	NA	0.64	<2.2e-16	0.65	<2.2e-16	0.13	<2.2e-16	0.52	<2.2e-16	0.08	<2.2e-16	0.43	<2.2e-16	0.36	<2.2e-16	0.58	<2.2e-16	0.48	<2.2e-16	0.25	<2.2e-16	0.55	<2.2e-16
H3K9ME3	K562	TSS	protein coding	0.44	<2.2e-16	0.34	<2.2e-16	NA	NA	0.29	<2.2e-16	0.48	<2.2e-16	NA	NA	NA	NA	NA	NA	0.31	<2.2e-16	0.53	<2.2e-16	0.26	<2.2e-16	NA	NA	0.5	<2.2e-16	0.5	<2.2e-16	0.09	<2.2e-16	0.48	<2.2e-16	0.06	5e-16	0.22	<2.2e-16	0.31	<2.2e-16	0.36	<2.2e-16	0.36	<2.2e-16	0.19	<2.2e-16	0.33	<2.2e-16
H4K20ME1	K562	TSS	protein coding	0.46	<2.2e-16	0.38	<2.2e-16	NA	NA	0.35	<2.2e-16	0.52	<2.2e-16	NA	NA	NA	NA	NA	NA	0.4	<2.2e-16	0.46	<2.2e-16	0.38	<2.2e-16	NA	NA	0.47	<2.2e-16	0.5	<2.2e-16	0.22	<2.2e-16	0.44	<2.2e-16	0.16	<2.2e-16	0.46	<2.2e-16	0.35	<2.2e-16	0.54	<2.2e-16	0.59	<2.2e-16	0.29	<2.2e-16	0.45	<2.2e-16
HCFC1	K562	TSS	protein coding	0.48	<2.2e-16	0.54	<2.2e-16	NA	NA	0.4	<2.2e-16	0.48	<2.2e-16	NA	NA	NA	NA	NA	NA	0.48	<2.2e-16	0.46	<2.2e-16	0.39	<2.2e-16	NA	NA	0.42	<2.2e-16	0.51	<2.2e-16	-0.09	<2.2e-16	0.52	<2.2e-16	-0.11	<2.2e-16	0.4	<2.2e-16	0.37	<2.2e-16	0.5	<2.2e-16	0.43	<2.2e-16	0.3	<2.2e-16	0.34	<2.2e-16
HDAC1	K562	TSS	protein coding	0.72	<2.2e-16	0.57	<2.2e-16	NA	NA	0.55	<2.2e-16	0.74	<2.2e-16	NA	NA	NA	NA	NA	NA	0.55	<2.2e-16	0.66	<2.2e-16	0.65	<2.2e-16	NA	NA	0.63	<2.2e-16	0.73	<2.2e-16	-0.03	5e-05	0.77	<2.2e-16	-0.07	<2.2e-16	0.76	<2.2e-16	0.53	<2.2e-16	0.8	<2.2e-16	0.8	<2.2e-16	0.39	<2.2e-16	0.72	<2.2e-16
HDAC2	K562	TSS	protein coding	0.62	<2.2e-16	0.46	<2.2e-16	NA	NA	0.48	<2.2e-16	0.67	<2.2e-16	NA	NA	NA	NA	NA	NA	0.46	<2.2e-16	0.57	<2.2e-16	0.59	<2.2e-16	NA	NA	0.58	<2.2e-16	0.65	<2.2e-16	0.07	<2.2e-16	0.69	<2.2e-16	0.02	2	0.74	<2.2e-16	0.43	<2.2e-16	0.76	<2.2e-16	0.7	<2.2e-16	0.32	<2.2e-16	0.78	<2.2e-16
HDAC6	K562	TSS	protein coding	0.55	<2.2e-16	0.44	<2.2e-16	NA	NA	0.44	<2.2e-16	0.63	<2.2e-16	NA	NA	NA	NA	NA	NA	0.47	<2.2e-16	0.53	<2.2e-16	0.49	<2.2e-16	NA	NA	0.56	<2.2e-16	0.6	<2.2e-16	0.16	<2.2e-16	0.6	<2.2e-16	0.1	<2.2e-16	0.63	<2.2e-16	0.42	<2.2e-16	0.67	<2.2e-16	0.66	<2.2e-16	0.3	<2.2e-16	0.67	<2.2e-16
HMGN3	K562	TSS	protein coding	0.7	<2.2e-16	0.5	<2.2e-16	NA	NA	0.54	<2.2e-16	0.74	<2.2e-16	NA	NA	NA	NA	NA	NA	0.56	<2.2e-16	0.62	<2.2e-16	0.67	<2.2e-16	NA	NA	0.61	<2.2e-16	0.71	<2.2e-16	-0.06	1e-15	0.72	<2.2e-16	-0.1	<2.2e-16	0.96	<2.2e-16	0.46	<2.2e-16	0.86	<2.2e-16	0.77	<2.2e-16	0.39	<2.2e-16	0.71	<2.2e-16
IRF1	K562	TSS	protein coding	0.87	<2.2e-16	0.64	<2.2e-16	NA	NA	0.61	<2.2e-16	0.83	<2.2e-16	NA	NA	NA	NA	NA	NA	0.59	<2.2e-16	0.83	<2.2e-16	0.58	<2.2e-16	NA	NA	0.78	<2.2e-16	0.83	<2.2e-16	-0.05	4e-13	0.72	<2.2e-16	-0.09	<2.2e-16	0.62	<2.2e-16	0.59	<2.2e-16	0.78	<2.2e-16	0.7	<2.2e-16	0.39	<2.2e-16	0.53	<2.2e-16
JARID1B-PLU1	K562	TSS	protein coding	0.74	<2.2e-16	0.57	<2.2e-16	NA	NA	0.58	<2.2e-16	0.75	<2.2e-16	NA	NA	NA	NA	NA	NA	0.65	<2.2e-16	0.65	<2.2e-16	0.61	<2.2e-16	NA	NA	0.61	<2.2e-16	0.72	<2.2e-16	-0.05	4e-12	0.77	<2.2e-16	-0.09	<2.2e-16	0.79	<2.2e-16	0.58	<2.2e-16	0.83	<2.2e-16	0.89	<2.2e-16	0.43	<2.2e-16	0.68	<2.2e-16
JUN	K562	TSS	protein coding	0.87	<2.2e-16	0.71	<2.2e-16	NA	NA	0.76	<2.2e-16	0.86	<2.2e-16	NA	NA	NA	NA	NA	NA	0.64	<2.2e-16	0.81	<2.2e-16	0.72	<2.2e-16	NA	NA	0.76	<2.2e-16	0.86	<2.2e-16	-0.07	<2.2e-16	0.84	<2.2e-16	-0.12	<2.2e-16	0.81	<2.2e-16	0.63	<2.2e-16	0.89	<2.2e-16	0.8	<2.2e-16	0.43	<2.2e-16	0.68	<2.2e-16
KAP1	K562	TSS	protein coding	0.85	<2.2e-16	0.6	<2.2e-16	NA	NA	0.58	<2.2e-16	0.84	<2.2e-16	NA	NA	NA	NA	NA	NA	0.61	<2.2e-16	0.84	<2.2e-16	0.56	<2.2e-16	NA	NA	0.78	<2.2e-16	0.83	<2.2e-16	-0.06	<2.2e-16	0.77	<2.2e-16	-0.1	<2.2e-16	0.62	<2.2e-16	0.56	<2.2e-16	0.76	<2.2e-16	0.69	<2.2e-16	0.39	<2.2e-16	0.53	<2.2e-16
KAT2B-PCAF	K562	TSS	protein coding	0.71	<2.2e-16	0.54	<2.2e-16	NA	NA	0.54	<2.2e-16	0.71	<2.2e-16	NA	NA	NA	NA	NA	NA	0.55	<2.2e-16	0.66	<2.2e-16	0.55	<2.2e-16	NA	NA	0.64	<2.2e-16	0.71	<2.2e-16	0.07	<2.2e-16	0.72	<2.2e-16	0.02	5	0.65	<2.2e-16	0.54	<2.2e-16	0.71	<2.2e-16	0.74	<2.2e-16	0.35	<2.2e-16	0.71	<2.2e-16
KDM1A-LSD1	K562	TSS	protein coding	0.69	<2.2e-16	0.46	<2.2e-16	NA	NA	0.52	<2.2e-16	0.65	<2.2e-16	NA	NA	NA	NA	NA	NA	0.44	<2.2e-16	0.62	<2.2e-16	0.55	<2.2e-16	NA	NA	0.59	<2.2e-16	0.66	<2.2e-16	0.05	4e-12	0.68	<2.2e-16	0.02	0.02	0.66	<2.2e-16	0.5	<2.2e-16	0.72	<2.2e-16	0.66	<2.2e-16	0.3	<2.2e-16	0.77	<2.2e-16
MAFF	K562	TSS	protein coding	0.81	<2.2e-16	0.58	<2.2e-16	NA	NA	0.59	<2.2e-16	0.84	<2.2e-16	NA	NA	NA	NA	NA	NA	0.56	<2.2e-16	0.77	<2.2e-16	0.56	<2.2e-16	NA	NA	0.71	<2.2e-16	0.77	<2.2e-16	-0.03	6e-05	0.67	<2.2e-16	-0.07	<2.2e-16	0.56	<2.2e-16	0.57	<2.2e-16	0.72	<2.2e-16	0.67	<2.2e-16	0.5	<2.2e-16	0.5	<2.2e-16
MAFK	K562	TSS	protein coding	0.86	<2.2e-16	0.64	<2.2e-16	NA	NA	0.64	<2.2e-16	0.89	<2.2e-16	NA	NA	NA	NA	NA	NA	0.59	<2.2e-16	0.82	<2.2e-16	0.62	<2.2e-16	NA	NA	0.77	<2.2e-16	0.84	<2.2e-16	-0.04	9e-07	0.75	<2.2e-16	-0.08	<2.2e-16	0.68	<2.2e-16	0.59	<2.2e-16	0.82	<2.2e-16	0.74	<2.2e-16	0.4	<2.2e-16	0.61	<2.2e-16
MAX	K562	TSS	protein coding	0.71	<2.2e-16	0.58	<2.2e-16	NA	NA	0.58	<2.2e-16	0.73	<2.2e-16	NA	NA	NA	NA	NA	NA	0.58	<2.2e-16	0.65	<2.2e-16	0.76	<2.2e-16	NA	NA	0.61	<2.2e-16	0.72	<2.2e-16	-0.1	<2.2e-16	0.79	<2.2e-16	-0.14	<2.2e-16	0.78	<2.2e-16	0.53	<2.2e-16	0.79	<2.2e-16	0.74	<2.2e-16	0.4	<2.2e-16	0.6	<2.2e-16
MAZ	K562	TSS	protein coding	0.74	<2.2e-16	0.56	<2.2e-16	NA	NA	0.58	<2.2e-16	0.74	<2.2e-16	NA	NA	NA	NA	NA	NA	0.58	<2.2e-16	0.64	<2.2e-16	0.67	<2.2e-16	NA	NA	0.62	<2.2e-16	0.72	<2.2e-16	-0.07	<2.2e-16	0.75	<2.2e-16	-0.11	<2.2e-16	0.88	<2.2e-16	0.5	<2.2e-16	0.85	<2.2e-16	0.76	<2.2e-16	0.41	<2.2e-16	0.7	<2.2e-16
MEF2A	K562	TSS	protein coding	0.76	<2.2e-16	0.57	<2.2e-16	NA	NA	0.64	<2.2e-16	0.73	<2.2e-16	NA	NA	NA	NA	NA	NA	0.67	<2.2e-16	0.69	<2.2e-16	0.55	<2.2e-16	NA	NA	0.63	<2.2e-16	0.71	<2.2e-16	-0.04	5e-08	0.73	<2.2e-16	-0.08	<2.2e-16	0.61	<2.2e-16	0.61	<2.2e-16	0.74	<2.2e-16	0.69	<2.2e-16	0.36	<2.2e-16	0.52	<2.2e-16
MXI1	K562	TSS	protein coding	0.8	<2.2e-16	0.64	<2.2e-16	NA	NA	0.62	<2.2e-16	0.82	<2.2e-16	NA	NA	NA	NA	NA	NA	0.64	<2.2e-16	0.75	<2.2e-16	0.67	<2.2e-16	NA	NA	0.7	<2.2e-16	0.79	<2.2e-16	-0.09	<2.2e-16	0.77	<2.2e-16	-0.13	<2.2e-16	0.74	<2.2e-16	0.58	<2.2e-16	0.83	<2.2e-16	0.78	<2.2e-16	0.47	<2.2e-16	0.59	<2.2e-16
MYC	K562	TSS	protein coding	0.75	<2.2e-16	0.57	<2.2e-16	NA	NA	0.58	<2.2e-16	0.75	<2.2e-16	NA	NA	NA	NA	NA	NA	0.66	<2.2e-16	0.67	<2.2e-16	0.68	<2.2e-16	NA	NA	0.62	<2.2e-16	0.73	<2.2e-16	-0.09	<2.2e-16	0.79	<2.2e-16	-0.12	<2.2e-16	0.77	<2.2e-16	0.56	<2.2e-16	0.8	<2.2e-16	0.81	<2.2e-16	0.42	<2.2e-16	0.62	<2.2e-16
NCOR1	K562	TSS	protein coding	0.64	<2.2e-16	0.46	<2.2e-16	NA	NA	0.5	<2.2e-16	0.63	<2.2e-16	NA	NA	NA	NA	NA	NA	0.49	<2.2e-16	0.57	<2.2e-16	0.54	<2.2e-16	NA	NA	0.54	<2.2e-16	0.61	<2.2e-16	0.07	<2.2e-16	0.67	<2.2e-16	0.04	1e-06	0.66	<2.2e-16	0.49	<2.2e-16	0.68	<2.2e-16	0.71	<2.2e-16	0.32	<2.2e-16	0.74	<2.2e-16
NFE2	K562	TSS	protein coding	0.66	<2.2e-16	0.54	<2.2e-16	NA	NA	0.55	<2.2e-16	0.74	<2.2e-16	NA	NA	NA	NA	NA	NA	0.48	<2.2e-16	0.66	<2.2e-16	0.67	<2.2e-16	NA	NA	0.65	<2.2e-16	0.71	<2.2e-16	0	0.5	0.65	<2.2e-16	-0.05	5e-13	0.64	<2.2e-16	0.47	<2.2e-16	0.72	<2.2e-16	0.61	<2.2e-16	0.34	<2.2e-16	0.56	<2.2e-16
NFYA	K562	TSS	protein coding	0.49	<2.2e-16	0.44	<2.2e-16	NA	NA	0.32	<2.2e-16	0.42	<2.2e-16	NA	NA	NA	NA	NA	NA	0.28	<2.2e-16	0.4	<2.2e-16	0.34	<2.2e-16	NA	NA	0.37	<2.2e-16	0.43	<2.2e-16	-0.05	2e-12	0.42	<2.2e-16	-0.08	<2.2e-16	0.36	<2.2e-16	0.35	<2.2e-16	0.44	<2.2e-16	0.41	<2.2e-16	0.32	<2.2e-16	0.3	<2.2e-16
NFYB	K562	TSS	protein coding	0.35	<2.2e-16	0.32	<2.2e-16	NA	NA	0.22	<2.2e-16	0.29	<2.2e-16	NA	NA	NA	NA	NA	NA	0.18	<2.2e-16	0.27	<2.2e-16	0.26	<2.2e-16	NA	NA	0.24	<2.2e-16	0.29	<2.2e-16	-0.05	7e-11	0.3	<2.2e-16	-0.07	<2.2e-16	0.28	<2.2e-16	0.25	<2.2e-16	0.32	<2.2e-16	0.31	<2.2e-16	0.25	<2.2e-16	0.22	<2.2e-16
NR2F2	K562	TSS	protein coding	0.8	<2.2e-16	0.62	<2.2e-16	NA	NA	0.67	<2.2e-16	0.76	<2.2e-16	NA	NA	NA	NA	NA	NA	0.65	<2.2e-16	0.72	<2.2e-16	0.61	<2.2e-16	NA	NA	0.66	<2.2e-16	0.76	<2.2e-16	-0.08	<2.2e-16	0.87	<2.2e-16	-0.12	<2.2e-16	0.69	<2.2e-16	0.67	<2.2e-16	0.84	<2.2e-16	0.77	<2.2e-16	0.4	<2.2e-16	0.66	<2.2e-16
NRF1	K562	TSS	protein coding	0.62	<2.2e-16	0.48	<2.2e-16	NA	NA	0.49	<2.2e-16	0.61	<2.2e-16	NA	NA	NA	NA	NA	NA	0.43	<2.2e-16	0.62	<2.2e-16	0.48	<2.2e-16	NA	NA	0.56	<2.2e-16	0.63	<2.2e-16	-0.05	2e-12	0.58	<2.2e-16	-0.08	<2.2e-16	0.49	<2.2e-16	0.45	<2.2e-16	0.58	<2.2e-16	0.54	<2.2e-16	0.32	<2.2e-16	0.39	<2.2e-16
P300	K562	TSS	protein coding	0.9	<2.2e-16	0.64	<2.2e-16	NA	NA	0.62	<2.2e-16	0.88	<2.2e-16	NA	NA	NA	NA	NA	NA	0.63	<2.2e-16	0.85	<2.2e-16	0.61	<2.2e-16	NA	NA	0.79	<2.2e-16	0.85	<2.2e-16	-0.03	2e-05	0.75	<2.2e-16	-0.07	<2.2e-16	0.66	<2.2e-16	0.61	<2.2e-16	0.82	<2.2e-16	0.73	<2.2e-16	0.41	<2.2e-16	0.55	<2.2e-16
PHF8	K562	TSS	protein coding	0.7	<2.2e-16	0.56	<2.2e-16	NA	NA	0.51	<2.2e-16	0.69	<2.2e-16	NA	NA	NA	NA	NA	NA	0.59	<2.2e-16	0.64	<2.2e-16	0.57	<2.2e-16	NA	NA	0.59	<2.2e-16	0.7	<2.2e-16	-0.12	<2.2e-16	0.75	<2.2e-16	-0.16	<2.2e-16	0.71	<2.2e-16	0.5	<2.2e-16	0.75	<2.2e-16	0.8	<2.2e-16	0.44	<2.2e-16	0.58	<2.2e-16
PML	K562	TSS	protein coding	0.73	<2.2e-16	0.59	<2.2e-16	NA	NA	0.63	<2.2e-16	0.72	<2.2e-16	NA	NA	NA	NA	NA	NA	0.75	<2.2e-16	0.65	<2.2e-16	0.55	<2.2e-16	NA	NA	0.58	<2.2e-16	0.68	<2.2e-16	-0.08	<2.2e-16	0.75	<2.2e-16	-0.12	<2.2e-16	0.62	<2.2e-16	0.66	<2.2e-16	0.78	<2.2e-16	0.78	<2.2e-16	0.44	<2.2e-16	0.48	<2.2e-16
POL2	K562	TSS	protein coding	0.74	<2.2e-16	0.59	<2.2e-16	NA	NA	0.59	<2.2e-16	0.73	<2.2e-16	NA	NA	NA	NA	NA	NA	0.69	<2.2e-16	0.64	<2.2e-16	0.57	<2.2e-16	NA	NA	0.58	<2.2e-16	0.69	<2.2e-16	-0.13	<2.2e-16	0.75	<2.2e-16	-0.17	<2.2e-16	0.74	<2.2e-16	0.59	<2.2e-16	0.82	<2.2e-16	0.84	<2.2e-16	0.43	<2.2e-16	0.54	<2.2e-16
POL3	K562	TSS	protein coding	0.61	<2.2e-16	0.47	<2.2e-16	NA	NA	0.46	<2.2e-16	0.62	<2.2e-16	NA	NA	NA	NA	NA	NA	0.4	<2.2e-16	0.69	<2.2e-16	0.41	<2.2e-16	NA	NA	0.65	<2.2e-16	0.68	<2.2e-16	-0.04	1e-06	0.53	<2.2e-16	-0.07	<2.2e-16	0.4	<2.2e-16	0.42	<2.2e-16	0.57	<2.2e-16	0.48	<2.2e-16	0.29	<2.2e-16	0.4	<2.2e-16
RAD21	K562	TSS	protein coding	0.68	<2.2e-16	0.49	<2.2e-16	NA	NA	0.51	<2.2e-16	0.68	<2.2e-16	NA	NA	NA	NA	NA	NA	0.49	<2.2e-16	0.68	<2.2e-16	0.48	<2.2e-16	NA	NA	0.64	<2.2e-16	0.7	<2.2e-16	-0.01	0.3	0.62	<2.2e-16	-0.05	2e-11	0.52	<2.2e-16	0.47	<2.2e-16	0.64	<2.2e-16	0.54	<2.2e-16	0.3	<2.2e-16	0.49	<2.2e-16
RBBP5	K562	TSS	protein coding	0.76	<2.2e-16	0.55	<2.2e-16	NA	NA	0.53	<2.2e-16	0.74	<2.2e-16	NA	NA	NA	NA	NA	NA	0.6	<2.2e-16	0.68	<2.2e-16	0.6	<2.2e-16	NA	NA	0.63	<2.2e-16	0.73	<2.2e-16	-0.07	<2.2e-16	0.75	<2.2e-16	-0.11	<2.2e-16	0.77	<2.2e-16	0.52	<2.2e-16	0.78	<2.2e-16	0.85	<2.2e-16	0.42	<2.2e-16	0.67	<2.2e-16
RDBP-NELF-E	K562	TSS	protein coding	0.75	<2.2e-16	0.58	<2.2e-16	NA	NA	0.55	<2.2e-16	0.8	<2.2e-16	NA	NA	NA	NA	NA	NA	0.62	<2.2e-16	0.76	<2.2e-16	0.58	<2.2e-16	NA	NA	0.73	<2.2e-16	0.81	<2.2e-16	-0.03	1e-05	0.72	<2.2e-16	-0.08	<2.2e-16	0.7	<2.2e-16	0.53	<2.2e-16	0.81	<2.2e-16	0.77	<2.2e-16	0.42	<2.2e-16	0.58	<2.2e-16
REST	K562	TSS	protein coding	0.2	<2.2e-16	0.15	<2.2e-16	NA	NA	0.18	<2.2e-16	0.21	<2.2e-16	NA	NA	NA	NA	NA	NA	0.19	<2.2e-16	0.16	<2.2e-16	0.18	<2.2e-16	NA	NA	0.15	<2.2e-16	0.18	<2.2e-16	0	0.8	0.23	<2.2e-16	-0.03	2e-05	0.22	<2.2e-16	0.17	<2.2e-16	0.24	<2.2e-16	0.21	<2.2e-16	0.11	<2.2e-16	0.17	<2.2e-16
RFX5	K562	TSS	protein coding	0.85	<2.2e-16	0.68	<2.2e-16	NA	NA	0.62	<2.2e-16	0.85	<2.2e-16	NA	NA	NA	NA	NA	NA	0.62	<2.2e-16	0.81	<2.2e-16	0.6	<2.2e-16	NA	NA	0.76	<2.2e-16	0.82	<2.2e-16	-0.02	0.02	0.74	<2.2e-16	-0.06	<2.2e-16	0.66	<2.2e-16	0.59	<2.2e-16	0.8	<2.2e-16	0.73	<2.2e-16	0.41	<2.2e-16	0.56	<2.2e-16
RNF2	K562	TSS	protein coding	0.26	<2.2e-16	0.15	<2.2e-16	NA	NA	0.18	<2.2e-16	0.28	<2.2e-16	NA	NA	NA	NA	NA	NA	0.18	<2.2e-16	0.22	<2.2e-16	0.25	<2.2e-16	NA	NA	0.24	<2.2e-16	0.25	<2.2e-16	0.76	<2.2e-16	0.28	<2.2e-16	0.75	<2.2e-16	0.33	<2.2e-16	0.18	<2.2e-16	0.28	<2.2e-16	0.31	<2.2e-16	0.1	<2.2e-16	0.42	<2.2e-16
RPC155	K562	TSS	protein coding	0.76	<2.2e-16	0.57	<2.2e-16	NA	NA	0.61	<2.2e-16	0.75	<2.2e-16	NA	NA	NA	NA	NA	NA	0.56	<2.2e-16	0.81	<2.2e-16	0.54	<2.2e-16	NA	NA	0.74	<2.2e-16	0.79	<2.2e-16	-0.04	6e-08	0.7	<2.2e-16	-0.08	<2.2e-16	0.59	<2.2e-16	0.53	<2.2e-16	0.72	<2.2e-16	0.64	<2.2e-16	0.36	<2.2e-16	0.56	<2.2e-16
SAP30	K562	TSS	protein coding	0.71	<2.2e-16	0.59	<2.2e-16	NA	NA	0.54	<2.2e-16	0.72	<2.2e-16	NA	NA	NA	NA	NA	NA	0.56	<2.2e-16	0.66	<2.2e-16	0.62	<2.2e-16	NA	NA	0.61	<2.2e-16	0.72	<2.2e-16	-0.07	<2.2e-16	0.75	<2.2e-16	-0.12	<2.2e-16	0.7	<2.2e-16	0.54	<2.2e-16	0.76	<2.2e-16	0.79	<2.2e-16	0.39	<2.2e-16	0.63	<2.2e-16
SETDB1	K562	TSS	protein coding	0.67	<2.2e-16	0.55	<2.2e-16	NA	NA	0.54	<2.2e-16	0.72	<2.2e-16	NA	NA	NA	NA	NA	NA	0.54	<2.2e-16	0.65	<2.2e-16	0.59	<2.2e-16	NA	NA	0.65	<2.2e-16	0.72	<2.2e-16	0.05	5e-13	0.72	<2.2e-16	0	0.8	0.71	<2.2e-16	0.5	<2.2e-16	0.76	<2.2e-16	0.75	<2.2e-16	0.36	<2.2e-16	0.73	<2.2e-16
SIN3AK20	K562	TSS	protein coding	0.68	<2.2e-16	0.58	<2.2e-16	NA	NA	0.54	<2.2e-16	0.7	<2.2e-16	NA	NA	NA	NA	NA	NA	0.62	<2.2e-16	0.63	<2.2e-16	0.63	<2.2e-16	NA	NA	0.59	<2.2e-16	0.69	<2.2e-16	-0.11	<2.2e-16	0.71	<2.2e-16	-0.15	<2.2e-16	0.7	<2.2e-16	0.52	<2.2e-16	0.76	<2.2e-16	0.75	<2.2e-16	0.41	<2.2e-16	0.53	<2.2e-16
SIRT6	K562	TSS	protein coding	0.9	<2.2e-16	0.64	<2.2e-16	NA	NA	0.65	<2.2e-16	0.85	<2.2e-16	NA	NA	NA	NA	NA	NA	0.62	<2.2e-16	0.88	<2.2e-16	0.68	<2.2e-16	NA	NA	0.8	<2.2e-16	0.88	<2.2e-16	-0.06	2e-15	0.79	<2.2e-16	-0.09	<2.2e-16	0.66	<2.2e-16	0.64	<2.2e-16	0.81	<2.2e-16	0.75	<2.2e-16	0.4	<2.2e-16	0.6	<2.2e-16
SIX5	K562	TSS	protein coding	0.29	<2.2e-16	0.37	<2.2e-16	NA	NA	0.26	<2.2e-16	0.29	<2.2e-16	NA	NA	NA	NA	NA	NA	0.33	<2.2e-16	0.28	<2.2e-16	0.25	<2.2e-16	NA	NA	0.25	<2.2e-16	0.31	<2.2e-16	-0.07	<2.2e-16	0.33	<2.2e-16	-0.08	<2.2e-16	0.2	<2.2e-16	0.24	<2.2e-16	0.29	<2.2e-16	0.24	<2.2e-16	0.2	<2.2e-16	0.19	<2.2e-16
SMARCA4-BRG1	K562	TSS	protein coding	0.89	<2.2e-16	0.62	<2.2e-16	NA	NA	0.64	<2.2e-16	0.87	<2.2e-16	NA	NA	NA	NA	NA	NA	0.68	<2.2e-16	0.81	<2.2e-16	0.64	<2.2e-16	NA	NA	0.75	<2.2e-16	0.84	<2.2e-16	-0.1	<2.2e-16	0.8	<2.2e-16	-0.13	<2.2e-16	0.77	<2.2e-16	0.64	<2.2e-16	0.89	<2.2e-16	0.85	<2.2e-16	0.46	<2.2e-16	0.65	<2.2e-16
SMARCB1-INI1	K562	TSS	protein coding	0.91	<2.2e-16	0.62	<2.2e-16	NA	NA	0.64	<2.2e-16	0.89	<2.2e-16	NA	NA	NA	NA	NA	NA	0.67	<2.2e-16	0.83	<2.2e-16	0.64	<2.2e-16	NA	NA	0.78	<2.2e-16	0.86	<2.2e-16	-0.08	<2.2e-16	0.8	<2.2e-16	-0.12	<2.2e-16	0.78	<2.2e-16	0.62	<2.2e-16	0.89	<2.2e-16	0.84	<2.2e-16	0.44	<2.2e-16	0.66	<2.2e-16
SMC3	K562	TSS	protein coding	0.68	<2.2e-16	0.5	<2.2e-16	NA	NA	0.52	<2.2e-16	0.72	<2.2e-16	NA	NA	NA	NA	NA	NA	0.53	<2.2e-16	0.64	<2.2e-16	0.56	<2.2e-16	NA	NA	0.64	<2.2e-16	0.7	<2.2e-16	-0.01	0.2	0.66	<2.2e-16	-0.05	5e-14	0.68	<2.2e-16	0.45	<2.2e-16	0.74	<2.2e-16	0.62	<2.2e-16	0.34	<2.2e-16	0.58	<2.2e-16
SP1	K562	TSS	protein coding	0.52	<2.2e-16	0.44	<2.2e-16	NA	NA	0.39	<2.2e-16	0.45	<2.2e-16	NA	NA	NA	NA	NA	NA	0.39	<2.2e-16	0.4	<2.2e-16	0.43	<2.2e-16	NA	NA	0.37	<2.2e-16	0.43	<2.2e-16	-0.04	9e-08	0.49	<2.2e-16	-0.07	<2.2e-16	0.47	<2.2e-16	0.38	<2.2e-16	0.5	<2.2e-16	0.47	<2.2e-16	0.34	<2.2e-16	0.37	<2.2e-16
SP2	K562	TSS	protein coding	0.37	<2.2e-16	0.3	<2.2e-16	NA	NA	0.23	<2.2e-16	0.3	<2.2e-16	NA	NA	NA	NA	NA	NA	0.27	<2.2e-16	0.29	<2.2e-16	0.25	<2.2e-16	NA	NA	0.27	<2.2e-16	0.31	<2.2e-16	-0.03	4e-05	0.32	<2.2e-16	-0.05	8e-13	0.27	<2.2e-16	0.24	<2.2e-16	0.32	<2.2e-16	0.29	<2.2e-16	0.24	<2.2e-16	0.23	<2.2e-16
SPI1-PU1	K562	TSS	protein coding	0.29	<2.2e-16	0.24	<2.2e-16	NA	NA	0.26	<2.2e-16	0.26	<2.2e-16	NA	NA	NA	NA	NA	NA	0.27	<2.2e-16	0.26	<2.2e-16	0.25	<2.2e-16	NA	NA	0.23	<2.2e-16	0.27	<2.2e-16	0.01	0.2	0.37	<2.2e-16	0	0.8	0.23	<2.2e-16	0.29	<2.2e-16	0.29	<2.2e-16	0.34	<2.2e-16	0.16	<2.2e-16	0.32	<2.2e-16
SRF	K562	TSS	protein coding	0.55	<2.2e-16	0.71	<2.2e-16	NA	NA	0.5	<2.2e-16	0.55	<2.2e-16	NA	NA	NA	NA	NA	NA	0.52	<2.2e-16	0.52	<2.2e-16	0.45	<2.2e-16	NA	NA	0.48	<2.2e-16	0.57	<2.2e-16	-0.07	<2.2e-16	0.59	<2.2e-16	-0.09	<2.2e-16	0.48	<2.2e-16	0.47	<2.2e-16	0.59	<2.2e-16	0.52	<2.2e-16	0.28	<2.2e-16	0.39	<2.2e-16
STAT1	K562	TSS	protein coding	0.87	<2.2e-16	0.65	<2.2e-16	NA	NA	0.65	<2.2e-16	0.85	<2.2e-16	NA	NA	NA	NA	NA	NA	0.65	<2.2e-16	0.84	<2.2e-16	0.64	<2.2e-16	NA	NA	0.78	<2.2e-16	0.87	<2.2e-16	-0.07	<2.2e-16	0.8	<2.2e-16	-0.12	<2.2e-16	0.7	<2.2e-16	0.63	<2.2e-16	0.85	<2.2e-16	0.77	<2.2e-16	0.43	<2.2e-16	0.63	<2.2e-16
STAT2	K562	TSS	protein coding	0.84	<2.2e-16	0.65	<2.2e-16	NA	NA	0.65	<2.2e-16	0.83	<2.2e-16	NA	NA	NA	NA	NA	NA	0.66	<2.2e-16	0.8	<2.2e-16	0.66	<2.2e-16	NA	NA	0.74	<2.2e-16	0.84	<2.2e-16	-0.08	<2.2e-16	0.82	<2.2e-16	-0.13	<2.2e-16	0.75	<2.2e-16	0.62	<2.2e-16	0.88	<2.2e-16	0.79	<2.2e-16	0.44	<2.2e-16	0.65	<2.2e-16
STAT5A	K562	TSS	protein coding	0.65	<2.2e-16	0.48	<2.2e-16	NA	NA	0.55	<2.2e-16	0.6	<2.2e-16	NA	NA	NA	NA	NA	NA	0.56	<2.2e-16	0.58	<2.2e-16	0.44	<2.2e-16	NA	NA	0.52	<2.2e-16	0.58	<2.2e-16	0.02	0.02	0.66	<2.2e-16	-0.02	0.04	0.49	<2.2e-16	0.61	<2.2e-16	0.66	<2.2e-16	0.59	<2.2e-16	0.28	<2.2e-16	0.51	<2.2e-16
SUZ12	K562	TSS	protein coding	0.03	0.0003	0.02	3	NA	NA	0.04	2e-07	0.08	<2.2e-16	NA	NA	NA	NA	NA	NA	0.07	<2.2e-16	0.01	0.09	0.05	2e-14	NA	NA	0.05	6e-14	0.03	2e-05	0.63	<2.2e-16	0.05	5e-14	0.59	<2.2e-16	0.07	<2.2e-16	0.05	4e-12	0.06	<2.2e-16	0.1	<2.2e-16	0.01	0.2	0.16	<2.2e-16
TAF1	K562	TSS	protein coding	0.72	<2.2e-16	0.54	<2.2e-16	NA	NA	0.56	<2.2e-16	0.69	<2.2e-16	NA	NA	NA	NA	NA	NA	0.71	<2.2e-16	0.63	<2.2e-16	0.54	<2.2e-16	NA	NA	0.56	<2.2e-16	0.67	<2.2e-16	-0.12	<2.2e-16	0.71	<2.2e-16	-0.15	<2.2e-16	0.65	<2.2e-16	0.57	<2.2e-16	0.74	<2.2e-16	0.82	<2.2e-16	0.44	<2.2e-16	0.47	<2.2e-16
TAF7	K562	TSS	protein coding	0.67	<2.2e-16	0.48	<2.2e-16	NA	NA	0.56	<2.2e-16	0.66	<2.2e-16	NA	NA	NA	NA	NA	NA	0.72	<2.2e-16	0.59	<2.2e-16	0.48	<2.2e-16	NA	NA	0.54	<2.2e-16	0.62	<2.2e-16	-0.04	6e-09	0.65	<2.2e-16	-0.08	<2.2e-16	0.58	<2.2e-16	0.56	<2.2e-16	0.7	<2.2e-16	0.72	<2.2e-16	0.35	<2.2e-16	0.47	<2.2e-16
TAL1	K562	TSS	protein coding	0.71	<2.2e-16	0.5	<2.2e-16	NA	NA	0.56	<2.2e-16	0.68	<2.2e-16	NA	NA	NA	NA	NA	NA	0.56	<2.2e-16	0.61	<2.2e-16	0.53	<2.2e-16	NA	NA	0.56	<2.2e-16	0.64	<2.2e-16	-0.06	<2.2e-16	0.65	<2.2e-16	-0.09	<2.2e-16	0.66	<2.2e-16	0.57	<2.2e-16	0.8	<2.2e-16	0.67	<2.2e-16	0.35	<2.2e-16	0.53	<2.2e-16
TBL1XR1-TBLR1	K562	TSS	protein coding	0.87	<2.2e-16	0.65	<2.2e-16	NA	NA	0.66	<2.2e-16	0.9	<2.2e-16	NA	NA	NA	NA	NA	NA	0.68	<2.2e-16	0.82	<2.2e-16	0.69	<2.2e-16	NA	NA	0.79	<2.2e-16	0.87	<2.2e-16	-0.05	9e-12	0.83	<2.2e-16	-0.1	<2.2e-16	0.84	<2.2e-16	0.6	<2.2e-16	0.93	<2.2e-16	0.84	<2.2e-16	0.47	<2.2e-16	0.7	<2.2e-16
TBP	K562	TSS	protein coding	0.72	<2.2e-16	0.55	<2.2e-16	NA	NA	0.62	<2.2e-16	0.7	<2.2e-16	NA	NA	NA	NA	NA	NA	0.67	<2.2e-16	0.65	<2.2e-16	0.53	<2.2e-16	NA	NA	0.57	<2.2e-16	0.66	<2.2e-16	-0.09	<2.2e-16	0.69	<2.2e-16	-0.12	<2.2e-16	0.64	<2.2e-16	0.58	<2.2e-16	0.73	<2.2e-16	0.79	<2.2e-16	0.44	<2.2e-16	0.49	<2.2e-16
TEAD4	K562	TSS	protein coding	0.81	<2.2e-16	0.58	<2.2e-16	NA	NA	0.68	<2.2e-16	0.75	<2.2e-16	NA	NA	NA	NA	NA	NA	0.67	<2.2e-16	0.7	<2.2e-16	0.6	<2.2e-16	NA	NA	0.63	<2.2e-16	0.72	<2.2e-16	-0.08	<2.2e-16	0.8	<2.2e-16	-0.11	<2.2e-16	0.71	<2.2e-16	0.67	<2.2e-16	0.84	<2.2e-16	0.76	<2.2e-16	0.38	<2.2e-16	0.6	<2.2e-16
THAP1	K562	TSS	protein coding	0.2	<2.2e-16	0.24	<2.2e-16	NA	NA	0.17	<2.2e-16	0.19	<2.2e-16	NA	NA	NA	NA	NA	NA	0.15	<2.2e-16	0.19	<2.2e-16	0.17	<2.2e-16	NA	NA	0.17	<2.2e-16	0.21	<2.2e-16	-0.04	3e-07	0.23	<2.2e-16	-0.05	2e-12	0.15	<2.2e-16	0.16	<2.2e-16	0.2	<2.2e-16	0.18	<2.2e-16	0.14	<2.2e-16	0.12	<2.2e-16
TR4-NR2C2	K562	TSS	protein coding	0.51	<2.2e-16	0.4	<2.2e-16	NA	NA	0.38	<2.2e-16	0.58	<2.2e-16	NA	NA	NA	NA	NA	NA	0.38	<2.2e-16	0.6	<2.2e-16	0.4	<2.2e-16	NA	NA	0.6	<2.2e-16	0.62	<2.2e-16	0.03	7e-05	0.48	<2.2e-16	-0.02	6	0.4	<2.2e-16	0.32	<2.2e-16	0.53	<2.2e-16	0.42	<2.2e-16	0.24	<2.2e-16	0.4	<2.2e-16
TRIM28	K562	TSS	protein coding	0.87	<2.2e-16	0.64	<2.2e-16	NA	NA	0.68	<2.2e-16	0.83	<2.2e-16	NA	NA	NA	NA	NA	NA	0.71	<2.2e-16	0.79	<2.2e-16	0.66	<2.2e-16	NA	NA	0.72	<2.2e-16	0.83	<2.2e-16	-0.08	<2.2e-16	0.91	<2.2e-16	-0.11	<2.2e-16	0.75	<2.2e-16	0.7	<2.2e-16	0.88	<2.2e-16	0.85	<2.2e-16	0.44	<2.2e-16	0.69	<2.2e-16
UBTF	K562	TSS	protein coding	0.75	<2.2e-16	0.47	<2.2e-16	NA	NA	0.52	<2.2e-16	0.73	<2.2e-16	NA	NA	NA	NA	NA	NA	0.59	<2.2e-16	0.63	<2.2e-16	0.59	<2.2e-16	NA	NA	0.6	<2.2e-16	0.69	<2.2e-16	-0.01	0.2	0.69	<2.2e-16	-0.04	9e-10	0.85	<2.2e-16	0.49	<2.2e-16	0.79	<2.2e-16	0.82	<2.2e-16	0.35	<2.2e-16	0.66	<2.2e-16
USF1	K562	TSS	protein coding	0.29	<2.2e-16	0.24	<2.2e-16	NA	NA	0.27	<2.2e-16	0.29	<2.2e-16	NA	NA	NA	NA	NA	NA	0.23	<2.2e-16	0.28	<2.2e-16	0.57	<2.2e-16	NA	NA	0.24	<2.2e-16	0.3	<2.2e-16	-0.05	2e-11	0.33	<2.2e-16	-0.06	<2.2e-16	0.31	<2.2e-16	0.22	<2.2e-16	0.3	<2.2e-16	0.28	<2.2e-16	0.15	<2.2e-16	0.21	<2.2e-16
USF2	K562	TSS	protein coding	0.71	<2.2e-16	0.56	<2.2e-16	NA	NA	0.54	<2.2e-16	0.74	<2.2e-16	NA	NA	NA	NA	NA	NA	0.54	<2.2e-16	0.73	<2.2e-16	0.72	<2.2e-16	NA	NA	0.69	<2.2e-16	0.76	<2.2e-16	-0.02	0.03	0.68	<2.2e-16	-0.06	<2.2e-16	0.6	<2.2e-16	0.51	<2.2e-16	0.71	<2.2e-16	0.65	<2.2e-16	0.36	<2.2e-16	0.51	<2.2e-16
WHSC1-NSD2	K562	TSS	protein coding	0.66	<2.2e-16	0.5	<2.2e-16	NA	NA	0.5	<2.2e-16	0.7	<2.2e-16	NA	NA	NA	NA	NA	NA	0.48	<2.2e-16	0.66	<2.2e-16	0.56	<2.2e-16	NA	NA	0.66	<2.2e-16	0.73	<2.2e-16	-0.05	3e-12	0.69	<2.2e-16	-0.1	<2.2e-16	0.69	<2.2e-16	0.46	<2.2e-16	0.76	<2.2e-16	0.73	<2.2e-16	0.35	<2.2e-16	0.75	<2.2e-16
XRCC4	K562	TSS	protein coding	0.79	<2.2e-16	0.61	<2.2e-16	NA	NA	0.58	<2.2e-16	0.83	<2.2e-16	NA	NA	NA	NA	NA	NA	0.58	<2.2e-16	0.84	<2.2e-16	0.59	<2.2e-16	NA	NA	0.8	<2.2e-16	0.87	<2.2e-16	-0.01	0.07	0.73	<2.2e-16	-0.07	<2.2e-16	0.63	<2.2e-16	0.54	<2.2e-16	0.79	<2.2e-16	0.7	<2.2e-16	0.39	<2.2e-16	0.58	<2.2e-16
YY1	K562	TSS	protein coding	0.49	<2.2e-16	0.43	<2.2e-16	NA	NA	0.4	<2.2e-16	0.48	<2.2e-16	NA	NA	NA	NA	NA	NA	0.43	<2.2e-16	0.45	<2.2e-16	0.39	<2.2e-16	NA	NA	0.4	<2.2e-16	0.48	<2.2e-16	-0.09	<2.2e-16	0.51	<2.2e-16	-0.12	<2.2e-16	0.44	<2.2e-16	0.39	<2.2e-16	0.51	<2.2e-16	0.55	<2.2e-16	0.3	<2.2e-16	0.33	<2.2e-16
ZBTB33	K562	TSS	protein coding	0.23	<2.2e-16	0.18	<2.2e-16	NA	NA	0.19	<2.2e-16	0.22	<2.2e-16	NA	NA	NA	NA	NA	NA	0.25	<2.2e-16	0.19	<2.2e-16	0.18	<2.2e-16	NA	NA	0.16	<2.2e-16	0.2	<2.2e-16	0	1	0.29	<2.2e-16	-0.01	0.06	0.19	<2.2e-16	0.25	<2.2e-16	0.23	<2.2e-16	0.32	<2.2e-16	0.81	<2.2e-16	0.21	<2.2e-16
ZBTB7A	K562	TSS	protein coding	0.51	<2.2e-16	0.32	<2.2e-16	NA	NA	0.4	<2.2e-16	0.53	<2.2e-16	NA	NA	NA	NA	NA	NA	0.39	<2.2e-16	0.41	<2.2e-16	0.51	<2.2e-16	NA	NA	0.43	<2.2e-16	0.5	<2.2e-16	-0.06	6e-15	0.54	<2.2e-16	-0.08	<2.2e-16	0.76	<2.2e-16	0.31	<2.2e-16	0.68	<2.2e-16	0.59	<2.2e-16	0.28	<2.2e-16	0.66	<2.2e-16
ZC3H11A	K562	TSS	protein coding	0.89	<2.2e-16	0.66	<2.2e-16	NA	NA	0.65	<2.2e-16	0.9	<2.2e-16	NA	NA	NA	NA	NA	NA	0.67	<2.2e-16	0.87	<2.2e-16	0.67	<2.2e-16	NA	NA	0.83	<2.2e-16	0.91	<2.2e-16	-0.04	5e-08	0.82	<2.2e-16	-0.09	<2.2e-16	0.79	<2.2e-16	0.59	<2.2e-16	0.9	<2.2e-16	0.8	<2.2e-16	0.43	<2.2e-16	0.68	<2.2e-16
ZMIZ1	K562	TSS	protein coding	0.89	<2.2e-16	0.65	<2.2e-16	NA	NA	0.68	<2.2e-16	0.89	<2.2e-16	NA	NA	NA	NA	NA	NA	0.69	<2.2e-16	0.82	<2.2e-16	0.69	<2.2e-16	NA	NA	0.78	<2.2e-16	0.87	<2.2e-16	-0.07	<2.2e-16	0.83	<2.2e-16	-0.11	<2.2e-16	0.86	<2.2e-16	0.63	<2.2e-16	0.95	<2.2e-16	0.86	<2.2e-16	0.46	<2.2e-16	0.7	<2.2e-16
ZNF143	K562	TSS	protein coding	0.36	<2.2e-16	0.36	<2.2e-16	NA	NA	0.29	<2.2e-16	0.36	<2.2e-16	NA	NA	NA	NA	NA	NA	0.34	<2.2e-16	0.34	<2.2e-16	0.28	<2.2e-16	NA	NA	0.31	<2.2e-16	0.37	<2.2e-16	-0.06	<2.2e-16	0.38	<2.2e-16	-0.08	<2.2e-16	0.28	<2.2e-16	0.27	<2.2e-16	0.36	<2.2e-16	0.3	<2.2e-16	0.24	<2.2e-16	0.27	<2.2e-16
ZNF263	K562	TSS	protein coding	0.45	<2.2e-16	0.36	<2.2e-16	NA	NA	0.37	<2.2e-16	0.53	<2.2e-16	NA	NA	NA	NA	NA	NA	0.37	<2.2e-16	0.44	<2.2e-16	0.47	<2.2e-16	NA	NA	0.46	<2.2e-16	0.53	<2.2e-16	0.02	0.0008	0.51	<2.2e-16	-0.02	0.03	0.63	<2.2e-16	0.3	<2.2e-16	0.63	<2.2e-16	0.52	<2.2e-16	0.27	<2.2e-16	0.57	<2.2e-16
ZNF274	K562	TSS	protein coding	0.38	<2.2e-16	0.3	<2.2e-16	NA	NA	0.24	<2.2e-16	0.47	<2.2e-16	NA	NA	NA	NA	NA	NA	0.22	<2.2e-16	0.59	<2.2e-16	0.22	<2.2e-16	NA	NA	0.59	<2.2e-16	0.56	<2.2e-16	0.09	<2.2e-16	0.28	<2.2e-16	0.05	2e-11	0.15	<2.2e-16	0.2	<2.2e-16	0.32	<2.2e-16	0.21	<2.2e-16	0.14	<2.2e-16	0.19	<2.2e-16
ZNF384	K562	TSS	protein coding	0.72	<2.2e-16	0.51	<2.2e-16	NA	NA	0.56	<2.2e-16	0.68	<2.2e-16	NA	NA	NA	NA	NA	NA	0.53	<2.2e-16	0.67	<2.2e-16	0.54	<2.2e-16	NA	NA	0.61	<2.2e-16	0.7	<2.2e-16	-0.06	<2.2e-16	0.66	<2.2e-16	-0.09	<2.2e-16	0.62	<2.2e-16	0.53	<2.2e-16	0.7	<2.2e-16	0.65	<2.2e-16	0.36	<2.2e-16	0.54	<2.2e-16
DNASE HYPERSENSITIVITY	K562	TSS	protein coding	0.7	<2.2e-16	0.55	<2.2e-16	NA	NA	0.53	<2.2e-16	0.71	<2.2e-16	NA	NA	NA	NA	NA	NA	0.51	<2.2e-16	0.62	<2.2e-16	0.66	<2.2e-16	NA	NA	0.6	<2.2e-16	0.7	<2.2e-16	-0.07	<2.2e-16	0.74	<2.2e-16	-0.11	<2.2e-16	0.83	<2.2e-16	0.47	<2.2e-16	0.82	<2.2e-16	0.73	<2.2e-16	0.42	<2.2e-16	0.69	<2.2e-16
FOS (AND EGFP-FOS)	K562	TSS	protein coding	0.46	<2.2e-16	0.4	<2.2e-16	NA	NA	0.33	<2.2e-16	0.39	<2.2e-16	NA	NA	NA	NA	NA	NA	0.27	<2.2e-16	0.37	<2.2e-16	0.35	<2.2e-16	NA	NA	0.33	<2.2e-16	0.4	<2.2e-16	-0.05	2e-13	0.4	<2.2e-16	-0.08	<2.2e-16	0.36	<2.2e-16	0.33	<2.2e-16	0.42	<2.2e-16	0.4	<2.2e-16	0.3	<2.2e-16	0.3	<2.2e-16
JUND (AND EGFP-JUND)	K562	TSS	protein coding	0.8	<2.2e-16	0.68	<2.2e-16	NA	NA	0.79	<2.2e-16	0.76	<2.2e-16	NA	NA	NA	NA	NA	NA	0.59	<2.2e-16	0.7	<2.2e-16	0.69	<2.2e-16	NA	NA	0.65	<2.2e-16	0.75	<2.2e-16	-0.08	<2.2e-16	0.76	<2.2e-16	-0.12	<2.2e-16	0.73	<2.2e-16	0.61	<2.2e-16	0.82	<2.2e-16	0.73	<2.2e-16	0.39	<2.2e-16	0.62	<2.2e-16
GATA2 (AND EGFP-GATA2)	K562	TSS	protein coding	0.42	<2.2e-16	0.28	<2.2e-16	NA	NA	0.38	<2.2e-16	0.33	<2.2e-16	NA	NA	NA	NA	NA	NA	0.34	<2.2e-16	0.31	<2.2e-16	0.28	<2.2e-16	NA	NA	0.27	<2.2e-16	0.32	<2.2e-16	0.02	0.04	0.45	<2.2e-16	0.01	0.4	0.33	<2.2e-16	0.46	<2.2e-16	0.47	<2.2e-16	0.39	<2.2e-16	0.16	<2.2e-16	0.4	<2.2e-16
ARID3A	K562	Transcript	protein coding	NA	NA	0.76	<2.2e-16	NA	NA	0.66	<2.2e-16	0.89	<2.2e-16	NA	NA	NA	NA	NA	NA	0.61	<2.2e-16	0.84	<2.2e-16	0.69	<2.2e-16	NA	NA	0.81	<2.2e-16	0.85	<2.2e-16	0.01	0.3	0.63	<2.2e-16	-0.03	2e-05	0.65	<2.2e-16	0.63	<2.2e-16	0.78	<2.2e-16	0.67	<2.2e-16	0.62	<2.2e-16	0.53	<2.2e-16
ATF1	K562	Transcript	protein coding	0.76	<2.2e-16	NA	NA	NA	NA	0.66	<2.2e-16	0.77	<2.2e-16	NA	NA	NA	NA	NA	NA	0.57	<2.2e-16	0.7	<2.2e-16	0.73	<2.2e-16	NA	NA	0.68	<2.2e-16	0.76	<2.2e-16	0.06	<2.2e-16	0.66	<2.2e-16	0.02	0.02	0.65	<2.2e-16	0.59	<2.2e-16	0.77	<2.2e-16	0.64	<2.2e-16	0.63	<2.2e-16	0.52	<2.2e-16
ATF3	K562	Transcript	protein coding	0.66	<2.2e-16	0.66	<2.2e-16	NA	NA	NA	NA	0.62	<2.2e-16	NA	NA	NA	NA	NA	NA	0.6	<2.2e-16	0.57	<2.2e-16	0.63	<2.2e-16	NA	NA	0.51	<2.2e-16	0.6	<2.2e-16	-0.02	0.02	0.65	<2.2e-16	-0.05	5e-11	0.6	<2.2e-16	0.69	<2.2e-16	0.69	<2.2e-16	0.59	<2.2e-16	0.54	<2.2e-16	0.49	<2.2e-16
BACH1	K562	Transcript	protein coding	0.89	<2.2e-16	0.77	<2.2e-16	NA	NA	0.62	<2.2e-16	NA	NA	NA	NA	NA	NA	NA	NA	0.61	<2.2e-16	0.83	<2.2e-16	0.73	<2.2e-16	NA	NA	0.82	<2.2e-16	0.87	<2.2e-16	0.04	5e-09	0.62	<2.2e-16	-0.01	0.2	0.68	<2.2e-16	0.56	<2.2e-16	0.82	<2.2e-16	0.68	<2.2e-16	0.66	<2.2e-16	0.54	<2.2e-16
BCLAF1	K562	Transcript	protein coding	0.61	<2.2e-16	0.57	<2.2e-16	NA	NA	0.6	<2.2e-16	0.61	<2.2e-16	NA	NA	NA	NA	NA	NA	NA	NA	0.48	<2.2e-16	0.61	<2.2e-16	NA	NA	0.45	<2.2e-16	0.55	<2.2e-16	-0.01	0.2	0.68	<2.2e-16	-0.05	6e-11	0.67	<2.2e-16	0.6	<2.2e-16	0.7	<2.2e-16	0.72	<2.2e-16	0.64	<2.2e-16	0.46	<2.2e-16
BDP1	K562	Transcript	protein coding	0.84	<2.2e-16	0.7	<2.2e-16	NA	NA	0.57	<2.2e-16	0.83	<2.2e-16	NA	NA	NA	NA	NA	NA	0.48	<2.2e-16	NA	NA	0.58	<2.2e-16	NA	NA	0.87	<2.2e-16	0.9	<2.2e-16	0.03	0.0002	0.49	<2.2e-16	-0.01	0.5	0.48	<2.2e-16	0.52	<2.2e-16	0.66	<2.2e-16	0.53	<2.2e-16	0.5	<2.2e-16	0.44	<2.2e-16
BHLHE40	K562	Transcript	protein coding	0.69	<2.2e-16	0.73	<2.2e-16	NA	NA	0.63	<2.2e-16	0.73	<2.2e-16	NA	NA	NA	NA	NA	NA	0.61	<2.2e-16	0.58	<2.2e-16	NA	NA	NA	NA	0.58	<2.2e-16	0.69	<2.2e-16	0.03	6e-05	0.74	<2.2e-16	-0.02	2	0.81	<2.2e-16	0.56	<2.2e-16	0.84	<2.2e-16	0.71	<2.2e-16	0.69	<2.2e-16	0.61	<2.2e-16
BRF1	K562	Transcript	protein coding	0.81	<2.2e-16	0.68	<2.2e-16	NA	NA	0.51	<2.2e-16	0.82	<2.2e-16	NA	NA	NA	NA	NA	NA	0.45	<2.2e-16	0.87	<2.2e-16	0.58	<2.2e-16	NA	NA	NA	NA	0.86	<2.2e-16	0.05	5e-13	0.46	<2.2e-16	0.01	0.3	0.49	<2.2e-16	0.46	<2.2e-16	0.66	<2.2e-16	0.52	<2.2e-16	0.5	<2.2e-16	0.44	<2.2e-16
BRF2	K562	Transcript	protein coding	0.85	<2.2e-16	0.76	<2.2e-16	NA	NA	0.6	<2.2e-16	0.87	<2.2e-16	NA	NA	NA	NA	NA	NA	0.55	<2.2e-16	0.9	<2.2e-16	0.69	<2.2e-16	NA	NA	0.86	<2.2e-16	NA	NA	0.04	1e-07	0.59	<2.2e-16	-0.01	0.3	0.6	<2.2e-16	0.56	<2.2e-16	0.77	<2.2e-16	0.63	<2.2e-16	0.59	<2.2e-16	0.53	<2.2e-16
CBX2	K562	Transcript	protein coding	0.01	0.3	0.06	<2.2e-16	NA	NA	-0.02	0.02	0.04	5e-09	NA	NA	NA	NA	NA	NA	-0.01	0.2	0.03	0.0002	0.03	6e-05	NA	NA	0.05	5e-13	0.04	1e-07	NA	NA	0.01	0.04	0.93	<2.2e-16	-0.03	5e-06	0.02	7	-0.01	0.3	0.07	<2.2e-16	-0.01	0.2	0.14	<2.2e-16
CBX3	K562	Transcript	protein coding	0.63	<2.2e-16	0.66	<2.2e-16	NA	NA	0.65	<2.2e-16	0.62	<2.2e-16	NA	NA	NA	NA	NA	NA	0.68	<2.2e-16	0.49	<2.2e-16	0.74	<2.2e-16	NA	NA	0.46	<2.2e-16	0.59	<2.2e-16	0.01	0.04	NA	NA	-0.03	3e-05	0.75	<2.2e-16	0.68	<2.2e-16	0.78	<2.2e-16	0.74	<2.2e-16	0.65	<2.2e-16	0.67	<2.2e-16
CBX8	K562	Transcript	protein coding	-0.03	2e-05	0.02	0.02	NA	NA	-0.05	5e-11	-0.01	0.2	NA	NA	NA	NA	NA	NA	-0.05	6e-11	-0.01	0.5	-0.02	2	NA	NA	0.01	0.3	-0.01	0.3	0.93	<2.2e-16	-0.03	3e-05	NA	NA	-0.08	<2.2e-16	-0.01	0.4	-0.06	<2.2e-16	0.02	8	-0.06	5e-15	0.1	<2.2e-16
CCNT2	K562	Transcript	protein coding	0.65	<2.2e-16	0.65	<2.2e-16	NA	NA	0.6	<2.2e-16	0.68	<2.2e-16	NA	NA	NA	NA	NA	NA	0.67	<2.2e-16	0.48	<2.2e-16	0.81	<2.2e-16	NA	NA	0.49	<2.2e-16	0.6	<2.2e-16	-0.03	5e-06	0.75	<2.2e-16	-0.08	<2.2e-16	NA	NA	0.55	<2.2e-16	0.87	<2.2e-16	0.8	<2.2e-16	0.72	<2.2e-16	0.62	<2.2e-16
CEBPB	K562	Transcript	protein coding	0.63	<2.2e-16	0.59	<2.2e-16	NA	NA	0.69	<2.2e-16	0.56	<2.2e-16	NA	NA	NA	NA	NA	NA	0.6	<2.2e-16	0.52	<2.2e-16	0.56	<2.2e-16	NA	NA	0.46	<2.2e-16	0.56	<2.2e-16	0.02	7	0.68	<2.2e-16	-0.01	0.4	0.55	<2.2e-16	NA	NA	0.66	<2.2e-16	0.63	<2.2e-16	0.52	<2.2e-16	0.5	<2.2e-16
CEBPD	K562	Transcript	protein coding	0.78	<2.2e-16	0.77	<2.2e-16	NA	NA	0.69	<2.2e-16	0.82	<2.2e-16	NA	NA	NA	NA	NA	NA	0.7	<2.2e-16	0.66	<2.2e-16	0.84	<2.2e-16	NA	NA	0.66	<2.2e-16	0.77	<2.2e-16	-0.01	0.3	0.78	<2.2e-16	-0.06	<2.2e-16	0.87	<2.2e-16	0.66	<2.2e-16	NA	NA	0.79	<2.2e-16	0.76	<2.2e-16	0.66	<2.2e-16
CHD1	K562	Transcript	protein coding	0.67	<2.2e-16	0.64	<2.2e-16	NA	NA	0.59	<2.2e-16	0.68	<2.2e-16	NA	NA	NA	NA	NA	NA	0.72	<2.2e-16	0.53	<2.2e-16	0.71	<2.2e-16	NA	NA	0.52	<2.2e-16	0.63	<2.2e-16	0.07	<2.2e-16	0.74	<2.2e-16	0.02	8	0.8	<2.2e-16	0.63	<2.2e-16	0.79	<2.2e-16	NA	NA	0.69	<2.2e-16	0.65	<2.2e-16
CHD2	K562	Transcript	protein coding	0.62	<2.2e-16	0.63	<2.2e-16	NA	NA	0.54	<2.2e-16	0.66	<2.2e-16	NA	NA	NA	NA	NA	NA	0.64	<2.2e-16	0.5	<2.2e-16	0.69	<2.2e-16	NA	NA	0.5	<2.2e-16	0.59	<2.2e-16	-0.01	0.2	0.65	<2.2e-16	-0.06	5e-15	0.72	<2.2e-16	0.52	<2.2e-16	0.76	<2.2e-16	0.69	<2.2e-16	NA	NA	0.5	<2.2e-16
CHD4	K562	Transcript	protein coding	0.53	<2.2e-16	0.52	<2.2e-16	NA	NA	0.49	<2.2e-16	0.54	<2.2e-16	NA	NA	NA	NA	NA	NA	0.46	<2.2e-16	0.44	<2.2e-16	0.61	<2.2e-16	NA	NA	0.44	<2.2e-16	0.53	<2.2e-16	0.14	<2.2e-16	0.67	<2.2e-16	0.1	<2.2e-16	0.62	<2.2e-16	0.5	<2.2e-16	0.66	<2.2e-16	0.65	<2.2e-16	0.5	<2.2e-16	NA	NA
CHD7	K562	Transcript	protein coding	0.55	<2.2e-16	0.61	<2.2e-16	NA	NA	0.52	<2.2e-16	0.63	<2.2e-16	NA	NA	NA	NA	NA	NA	0.6	<2.2e-16	0.47	<2.2e-16	0.69	<2.2e-16	NA	NA	0.5	<2.2e-16	0.6	<2.2e-16	0.13	<2.2e-16	0.68	<2.2e-16	0.07	<2.2e-16	0.74	<2.2e-16	0.53	<2.2e-16	0.78	<2.2e-16	0.79	<2.2e-16	0.66	<2.2e-16	0.72	<2.2e-16
COREST-RCOR1	K562	Transcript	protein coding	0.82	<2.2e-16	0.8	<2.2e-16	NA	NA	0.66	<2.2e-16	0.86	<2.2e-16	NA	NA	NA	NA	NA	NA	0.63	<2.2e-16	0.73	<2.2e-16	0.85	<2.2e-16	NA	NA	0.74	<2.2e-16	0.83	<2.2e-16	0.04	2e-09	0.75	<2.2e-16	-0.02	0.03	0.82	<2.2e-16	0.6	<2.2e-16	0.93	<2.2e-16	0.74	<2.2e-16	0.72	<2.2e-16	0.68	<2.2e-16
CREB1	K562	Transcript	protein coding	0.67	<2.2e-16	0.82	<2.2e-16	NA	NA	0.64	<2.2e-16	0.67	<2.2e-16	NA	NA	NA	NA	NA	NA	0.68	<2.2e-16	0.56	<2.2e-16	0.67	<2.2e-16	NA	NA	0.52	<2.2e-16	0.63	<2.2e-16	0	0.8	0.75	<2.2e-16	-0.04	7e-08	0.7	<2.2e-16	0.65	<2.2e-16	0.75	<2.2e-16	0.74	<2.2e-16	0.65	<2.2e-16	0.56	<2.2e-16
CREBBP	K562	Transcript	protein coding	0.55	<2.2e-16	0.56	<2.2e-16	NA	NA	0.41	<2.2e-16	0.61	<2.2e-16	NA	NA	NA	NA	NA	NA	0.39	<2.2e-16	0.56	<2.2e-16	0.5	<2.2e-16	NA	NA	0.59	<2.2e-16	0.61	<2.2e-16	0.23	<2.2e-16	0.47	<2.2e-16	0.18	<2.2e-16	0.43	<2.2e-16	0.42	<2.2e-16	0.55	<2.2e-16	0.55	<2.2e-16	0.45	<2.2e-16	0.6	<2.2e-16
CTCF	K562	Transcript	protein coding	0.4	<2.2e-16	0.43	<2.2e-16	NA	NA	0.38	<2.2e-16	0.43	<2.2e-16	NA	NA	NA	NA	NA	NA	0.35	<2.2e-16	0.31	<2.2e-16	0.52	<2.2e-16	NA	NA	0.33	<2.2e-16	0.4	<2.2e-16	0.08	<2.2e-16	0.51	<2.2e-16	0.04	7e-08	0.5	<2.2e-16	0.34	<2.2e-16	0.52	<2.2e-16	0.42	<2.2e-16	0.4	<2.2e-16	0.45	<2.2e-16
CTCFL	K562	Transcript	protein coding	0.52	<2.2e-16	0.57	<2.2e-16	NA	NA	0.5	<2.2e-16	0.57	<2.2e-16	NA	NA	NA	NA	NA	NA	0.55	<2.2e-16	0.42	<2.2e-16	0.69	<2.2e-16	NA	NA	0.44	<2.2e-16	0.53	<2.2e-16	0.03	4e-06	0.65	<2.2e-16	-0.01	0.07	0.72	<2.2e-16	0.44	<2.2e-16	0.71	<2.2e-16	0.61	<2.2e-16	0.6	<2.2e-16	0.54	<2.2e-16
CUX1	K562	Transcript	protein coding	0.93	<2.2e-16	0.79	<2.2e-16	NA	NA	0.64	<2.2e-16	0.92	<2.2e-16	NA	NA	NA	NA	NA	NA	0.58	<2.2e-16	0.87	<2.2e-16	0.73	<2.2e-16	NA	NA	0.85	<2.2e-16	0.88	<2.2e-16	0.03	2e-05	0.61	<2.2e-16	-0.01	0.04	0.66	<2.2e-16	0.59	<2.2e-16	0.81	<2.2e-16	0.66	<2.2e-16	0.62	<2.2e-16	0.55	<2.2e-16
E2F4	K562	Transcript	protein coding	0.6	<2.2e-16	0.68	<2.2e-16	NA	NA	0.58	<2.2e-16	0.66	<2.2e-16	NA	NA	NA	NA	NA	NA	0.65	<2.2e-16	0.48	<2.2e-16	0.81	<2.2e-16	NA	NA	0.5	<2.2e-16	0.62	<2.2e-16	0.02	0.02	0.77	<2.2e-16	-0.04	2e-08	0.87	<2.2e-16	0.53	<2.2e-16	0.85	<2.2e-16	0.76	<2.2e-16	0.74	<2.2e-16	0.62	<2.2e-16
E2F6	K562	Transcript	protein coding	0.5	<2.2e-16	0.54	<2.2e-16	NA	NA	0.48	<2.2e-16	0.54	<2.2e-16	NA	NA	NA	NA	NA	NA	0.57	<2.2e-16	0.36	<2.2e-16	0.74	<2.2e-16	NA	NA	0.37	<2.2e-16	0.48	<2.2e-16	0	0.8	0.75	<2.2e-16	-0.05	2e-10	0.78	<2.2e-16	0.45	<2.2e-16	0.71	<2.2e-16	0.65	<2.2e-16	0.63	<2.2e-16	0.53	<2.2e-16
EGFP-HDAC8	K562	Transcript	protein coding	0.44	<2.2e-16	0.57	<2.2e-16	NA	NA	0.49	<2.2e-16	0.53	<2.2e-16	NA	NA	NA	NA	NA	NA	0.49	<2.2e-16	0.35	<2.2e-16	0.73	<2.2e-16	NA	NA	0.39	<2.2e-16	0.51	<2.2e-16	0.02	0.02	0.65	<2.2e-16	-0.04	4e-09	0.73	<2.2e-16	0.43	<2.2e-16	0.78	<2.2e-16	0.63	<2.2e-16	0.61	<2.2e-16	0.62	<2.2e-16
EGFP-JUNB	K562	Transcript	protein coding	0.54	<2.2e-16	0.64	<2.2e-16	NA	NA	0.66	<2.2e-16	0.58	<2.2e-16	NA	NA	NA	NA	NA	NA	0.57	<2.2e-16	0.41	<2.2e-16	0.76	<2.2e-16	NA	NA	0.42	<2.2e-16	0.55	<2.2e-16	0.02	2	0.73	<2.2e-16	-0.03	8e-05	0.77	<2.2e-16	0.55	<2.2e-16	0.81	<2.2e-16	0.68	<2.2e-16	0.63	<2.2e-16	0.6	<2.2e-16
EGFP-NR4A1	K562	Transcript	protein coding	0.1	<2.2e-16	0.32	<2.2e-16	NA	NA	0.23	<2.2e-16	0.24	<2.2e-16	NA	NA	NA	NA	NA	NA	0.21	<2.2e-16	0.1	<2.2e-16	0.47	<2.2e-16	NA	NA	0.18	<2.2e-16	0.26	<2.2e-16	0.08	<2.2e-16	0.36	<2.2e-16	0.03	0.0002	0.45	<2.2e-16	0.17	<2.2e-16	0.5	<2.2e-16	0.35	<2.2e-16	0.36	<2.2e-16	0.42	<2.2e-16
EGR1	K562	Transcript	protein coding	0.47	<2.2e-16	0.5	<2.2e-16	NA	NA	0.5	<2.2e-16	0.48	<2.2e-16	NA	NA	NA	NA	NA	NA	0.55	<2.2e-16	0.32	<2.2e-16	0.64	<2.2e-16	NA	NA	0.33	<2.2e-16	0.43	<2.2e-16	-0.02	0.03	0.63	<2.2e-16	-0.06	1e-14	0.73	<2.2e-16	0.43	<2.2e-16	0.67	<2.2e-16	0.6	<2.2e-16	0.57	<2.2e-16	0.51	<2.2e-16
ELF1	K562	Transcript	protein coding	0.47	<2.2e-16	0.58	<2.2e-16	NA	NA	0.5	<2.2e-16	0.48	<2.2e-16	NA	NA	NA	NA	NA	NA	0.58	<2.2e-16	0.37	<2.2e-16	0.6	<2.2e-16	NA	NA	0.35	<2.2e-16	0.46	<2.2e-16	-0.05	2e-10	0.65	<2.2e-16	-0.09	<2.2e-16	0.6	<2.2e-16	0.48	<2.2e-16	0.62	<2.2e-16	0.57	<2.2e-16	0.58	<2.2e-16	0.42	<2.2e-16
ELK1	K562	Transcript	protein coding	0.85	<2.2e-16	0.81	<2.2e-16	NA	NA	0.65	<2.2e-16	0.9	<2.2e-16	NA	NA	NA	NA	NA	NA	0.7	<2.2e-16	0.76	<2.2e-16	0.81	<2.2e-16	NA	NA	0.76	<2.2e-16	0.84	<2.2e-16	0.04	2e-06	0.72	<2.2e-16	-0.02	2	0.79	<2.2e-16	0.6	<2.2e-16	0.89	<2.2e-16	0.77	<2.2e-16	0.74	<2.2e-16	0.59	<2.2e-16
ETS1	K562	Transcript	protein coding	0.56	<2.2e-16	0.64	<2.2e-16	NA	NA	0.58	<2.2e-16	0.61	<2.2e-16	NA	NA	NA	NA	NA	NA	0.72	<2.2e-16	0.42	<2.2e-16	0.76	<2.2e-16	NA	NA	0.42	<2.2e-16	0.55	<2.2e-16	-0.02	0.04	0.78	<2.2e-16	-0.06	<2.2e-16	0.84	<2.2e-16	0.54	<2.2e-16	0.81	<2.2e-16	0.77	<2.2e-16	0.7	<2.2e-16	0.58	<2.2e-16
EZH2	K562	Transcript	protein coding	0.31	<2.2e-16	0.34	<2.2e-16	NA	NA	0.2	<2.2e-16	0.36	<2.2e-16	NA	NA	NA	NA	NA	NA	0.19	<2.2e-16	0.31	<2.2e-16	0.28	<2.2e-16	NA	NA	0.35	<2.2e-16	0.34	<2.2e-16	0.74	<2.2e-16	0.23	<2.2e-16	0.69	<2.2e-16	0.18	<2.2e-16	0.22	<2.2e-16	0.27	<2.2e-16	0.31	<2.2e-16	0.21	<2.2e-16	0.33	<2.2e-16
FOSL1	K562	Transcript	protein coding	0.59	<2.2e-16	0.61	<2.2e-16	NA	NA	0.7	<2.2e-16	0.6	<2.2e-16	NA	NA	NA	NA	NA	NA	0.52	<2.2e-16	0.53	<2.2e-16	0.63	<2.2e-16	NA	NA	0.51	<2.2e-16	0.6	<2.2e-16	0.02	2	0.63	<2.2e-16	-0.02	9	0.58	<2.2e-16	0.54	<2.2e-16	0.7	<2.2e-16	0.56	<2.2e-16	0.53	<2.2e-16	0.54	<2.2e-16
GABP	K562	Transcript	protein coding	0.3	<2.2e-16	0.38	<2.2e-16	NA	NA	0.32	<2.2e-16	0.3	<2.2e-16	NA	NA	NA	NA	NA	NA	0.48	<2.2e-16	0.25	<2.2e-16	0.35	<2.2e-16	NA	NA	0.23	<2.2e-16	0.3	<2.2e-16	-0.06	<2.2e-16	0.41	<2.2e-16	-0.08	<2.2e-16	0.35	<2.2e-16	0.31	<2.2e-16	0.4	<2.2e-16	0.35	<2.2e-16	0.34	<2.2e-16	0.22	<2.2e-16
GATA1	K562	Transcript	protein coding	0.91	<2.2e-16	0.8	<2.2e-16	NA	NA	0.68	<2.2e-16	0.89	<2.2e-16	NA	NA	NA	NA	NA	NA	0.62	<2.2e-16	0.83	<2.2e-16	0.78	<2.2e-16	NA	NA	0.81	<2.2e-16	0.87	<2.2e-16	0.02	8	0.68	<2.2e-16	-0.03	0.0002	0.74	<2.2e-16	0.64	<2.2e-16	0.87	<2.2e-16	0.71	<2.2e-16	0.66	<2.2e-16	0.6	<2.2e-16
GTF2B	K562	Transcript	protein coding	0.79	<2.2e-16	0.77	<2.2e-16	NA	NA	0.65	<2.2e-16	0.82	<2.2e-16	NA	NA	NA	NA	NA	NA	0.72	<2.2e-16	0.71	<2.2e-16	0.77	<2.2e-16	NA	NA	0.68	<2.2e-16	0.78	<2.2e-16	0.02	3	0.73	<2.2e-16	-0.03	2e-05	0.76	<2.2e-16	0.63	<2.2e-16	0.87	<2.2e-16	0.8	<2.2e-16	0.73	<2.2e-16	0.57	<2.2e-16
GTF2F1	K562	Transcript	protein coding	0.81	<2.2e-16	0.8	<2.2e-16	NA	NA	0.64	<2.2e-16	0.88	<2.2e-16	NA	NA	NA	NA	NA	NA	0.72	<2.2e-16	0.72	<2.2e-16	0.82	<2.2e-16	NA	NA	0.72	<2.2e-16	0.81	<2.2e-16	0.05	6e-14	0.75	<2.2e-16	-0.01	0.2	0.82	<2.2e-16	0.6	<2.2e-16	0.91	<2.2e-16	0.82	<2.2e-16	0.77	<2.2e-16	0.62	<2.2e-16
GTF3C2	K562	Transcript	protein coding	0.65	<2.2e-16	0.65	<2.2e-16	NA	NA	0.61	<2.2e-16	0.65	<2.2e-16	NA	NA	NA	NA	NA	NA	0.56	<2.2e-16	0.57	<2.2e-16	0.75	<2.2e-16	NA	NA	0.55	<2.2e-16	0.66	<2.2e-16	0.02	9	0.72	<2.2e-16	-0.03	4e-05	0.75	<2.2e-16	0.54	<2.2e-16	0.79	<2.2e-16	0.65	<2.2e-16	0.63	<2.2e-16	0.63	<2.2e-16
H2AZ	K562	Transcript	protein coding	0.57	<2.2e-16	0.59	<2.2e-16	NA	NA	0.47	<2.2e-16	0.55	<2.2e-16	NA	NA	NA	NA	NA	NA	0.43	<2.2e-16	0.46	<2.2e-16	0.64	<2.2e-16	NA	NA	0.45	<2.2e-16	0.54	<2.2e-16	0.1	<2.2e-16	0.7	<2.2e-16	0.06	<2.2e-16	0.58	<2.2e-16	0.47	<2.2e-16	0.63	<2.2e-16	0.55	<2.2e-16	0.51	<2.2e-16	0.59	<2.2e-16
H3K27AC	K562	Transcript	protein coding	0.65	<2.2e-16	0.65	<2.2e-16	NA	NA	0.65	<2.2e-16	0.62	<2.2e-16	NA	NA	NA	NA	NA	NA	0.71	<2.2e-16	0.49	<2.2e-16	0.69	<2.2e-16	NA	NA	0.46	<2.2e-16	0.59	<2.2e-16	-0.05	2e-13	0.78	<2.2e-16	-0.1	<2.2e-16	0.73	<2.2e-16	0.68	<2.2e-16	0.77	<2.2e-16	0.85	<2.2e-16	0.67	<2.2e-16	0.55	<2.2e-16
H3K27ME3	K562	Transcript	protein coding	-0.12	<2.2e-16	0.04	2e-07	NA	NA	-0.11	<2.2e-16	-0.01	0.06	NA	NA	NA	NA	NA	NA	-0.11	<2.2e-16	-0.05	5e-12	0	0.7	NA	NA	0.02	2	-0.01	0.1	0.64	<2.2e-16	-0.11	<2.2e-16	0.59	<2.2e-16	-0.09	<2.2e-16	-0.11	<2.2e-16	-0.03	4e-06	-0.05	3e-13	-0.05	2e-12	-0.04	5e-07
H3K36ME3	K562	Transcript	protein coding	0.58	<2.2e-16	0.43	<2.2e-16	NA	NA	0.44	<2.2e-16	0.58	<2.2e-16	NA	NA	NA	NA	NA	NA	0.46	<2.2e-16	0.61	<2.2e-16	0.41	<2.2e-16	NA	NA	0.55	<2.2e-16	0.6	<2.2e-16	-0.23	<2.2e-16	0.38	<2.2e-16	-0.24	<2.2e-16	0.4	<2.2e-16	0.43	<2.2e-16	0.52	<2.2e-16	0.49	<2.2e-16	0.43	<2.2e-16	0.32	<2.2e-16
H3K4ME1	K562	Transcript	protein coding	0.64	<2.2e-16	0.58	<2.2e-16	NA	NA	0.56	<2.2e-16	0.62	<2.2e-16	NA	NA	NA	NA	NA	NA	0.43	<2.2e-16	0.57	<2.2e-16	0.66	<2.2e-16	NA	NA	0.56	<2.2e-16	0.65	<2.2e-16	-0.03	4e-06	0.63	<2.2e-16	-0.07	<2.2e-16	0.6	<2.2e-16	0.52	<2.2e-16	0.74	<2.2e-16	0.57	<2.2e-16	0.51	<2.2e-16	0.65	<2.2e-16
H3K4ME2	K562	Transcript	protein coding	0.63	<2.2e-16	0.65	<2.2e-16	NA	NA	0.59	<2.2e-16	0.62	<2.2e-16	NA	NA	NA	NA	NA	NA	0.68	<2.2e-16	0.47	<2.2e-16	0.72	<2.2e-16	NA	NA	0.45	<2.2e-16	0.58	<2.2e-16	-0.03	3e-06	0.79	<2.2e-16	-0.08	<2.2e-16	0.78	<2.2e-16	0.62	<2.2e-16	0.78	<2.2e-16	0.87	<2.2e-16	0.69	<2.2e-16	0.58	<2.2e-16
H3K4ME3	K562	Transcript	protein coding	0.65	<2.2e-16	0.65	<2.2e-16	NA	NA	0.59	<2.2e-16	0.64	<2.2e-16	NA	NA	NA	NA	NA	NA	0.7	<2.2e-16	0.5	<2.2e-16	0.7	<2.2e-16	NA	NA	0.46	<2.2e-16	0.59	<2.2e-16	-0.04	5e-08	0.77	<2.2e-16	-0.08	<2.2e-16	0.76	<2.2e-16	0.63	<2.2e-16	0.76	<2.2e-16	0.88	<2.2e-16	0.69	<2.2e-16	0.56	<2.2e-16
H3K79ME2	K562	Transcript	protein coding	0.6	<2.2e-16	0.47	<2.2e-16	NA	NA	0.49	<2.2e-16	0.57	<2.2e-16	NA	NA	NA	NA	NA	NA	0.61	<2.2e-16	0.49	<2.2e-16	0.51	<2.2e-16	NA	NA	0.45	<2.2e-16	0.54	<2.2e-16	-0.11	<2.2e-16	0.52	<2.2e-16	-0.14	<2.2e-16	0.58	<2.2e-16	0.52	<2.2e-16	0.61	<2.2e-16	0.75	<2.2e-16	0.55	<2.2e-16	0.39	<2.2e-16
H3K9AC	K562	Transcript	protein coding	0.65	<2.2e-16	0.64	<2.2e-16	NA	NA	0.61	<2.2e-16	0.63	<2.2e-16	NA	NA	NA	NA	NA	NA	0.73	<2.2e-16	0.49	<2.2e-16	0.68	<2.2e-16	NA	NA	0.46	<2.2e-16	0.59	<2.2e-16	-0.05	7e-13	0.75	<2.2e-16	-0.1	<2.2e-16	0.74	<2.2e-16	0.65	<2.2e-16	0.75	<2.2e-16	0.88	<2.2e-16	0.69	<2.2e-16	0.53	<2.2e-16
H3K9ME1	K562	Transcript	protein coding	0.61	<2.2e-16	0.59	<2.2e-16	NA	NA	0.46	<2.2e-16	0.67	<2.2e-16	NA	NA	NA	NA	NA	NA	0.42	<2.2e-16	0.64	<2.2e-16	0.57	<2.2e-16	NA	NA	0.67	<2.2e-16	0.7	<2.2e-16	0.15	<2.2e-16	0.47	<2.2e-16	0.1	<2.2e-16	0.49	<2.2e-16	0.44	<2.2e-16	0.65	<2.2e-16	0.56	<2.2e-16	0.49	<2.2e-16	0.59	<2.2e-16
H3K9ME3	K562	Transcript	protein coding	0.46	<2.2e-16	0.38	<2.2e-16	NA	NA	0.28	<2.2e-16	0.47	<2.2e-16	NA	NA	NA	NA	NA	NA	0.26	<2.2e-16	0.52	<2.2e-16	0.26	<2.2e-16	NA	NA	0.49	<2.2e-16	0.48	<2.2e-16	0.14	<2.2e-16	0.35	<2.2e-16	0.13	<2.2e-16	0.19	<2.2e-16	0.3	<2.2e-16	0.29	<2.2e-16	0.35	<2.2e-16	0.23	<2.2e-16	0.36	<2.2e-16
H4K20ME1	K562	Transcript	protein coding	0.49	<2.2e-16	0.48	<2.2e-16	NA	NA	0.42	<2.2e-16	0.56	<2.2e-16	NA	NA	NA	NA	NA	NA	0.48	<2.2e-16	0.47	<2.2e-16	0.52	<2.2e-16	NA	NA	0.49	<2.2e-16	0.54	<2.2e-16	0.21	<2.2e-16	0.42	<2.2e-16	0.15	<2.2e-16	0.51	<2.2e-16	0.42	<2.2e-16	0.6	<2.2e-16	0.64	<2.2e-16	0.5	<2.2e-16	0.49	<2.2e-16
HCFC1	K562	Transcript	protein coding	0.57	<2.2e-16	0.69	<2.2e-16	NA	NA	0.55	<2.2e-16	0.6	<2.2e-16	NA	NA	NA	NA	NA	NA	0.63	<2.2e-16	0.48	<2.2e-16	0.67	<2.2e-16	NA	NA	0.46	<2.2e-16	0.57	<2.2e-16	-0.04	2e-07	0.67	<2.2e-16	-0.08	<2.2e-16	0.66	<2.2e-16	0.51	<2.2e-16	0.7	<2.2e-16	0.62	<2.2e-16	0.64	<2.2e-16	0.46	<2.2e-16
HDAC1	K562	Transcript	protein coding	0.59	<2.2e-16	0.66	<2.2e-16	NA	NA	0.56	<2.2e-16	0.64	<2.2e-16	NA	NA	NA	NA	NA	NA	0.61	<2.2e-16	0.46	<2.2e-16	0.79	<2.2e-16	NA	NA	0.48	<2.2e-16	0.6	<2.2e-16	0.09	<2.2e-16	0.8	<2.2e-16	0.03	3e-06	0.82	<2.2e-16	0.56	<2.2e-16	0.82	<2.2e-16	0.83	<2.2e-16	0.68	<2.2e-16	0.74	<2.2e-16
HDAC2	K562	Transcript	protein coding	0.49	<2.2e-16	0.58	<2.2e-16	NA	NA	0.49	<2.2e-16	0.57	<2.2e-16	NA	NA	NA	NA	NA	NA	0.5	<2.2e-16	0.38	<2.2e-16	0.74	<2.2e-16	NA	NA	0.43	<2.2e-16	0.53	<2.2e-16	0.16	<2.2e-16	0.72	<2.2e-16	0.09	<2.2e-16	0.76	<2.2e-16	0.47	<2.2e-16	0.77	<2.2e-16	0.72	<2.2e-16	0.61	<2.2e-16	0.77	<2.2e-16
HDAC6	K562	Transcript	protein coding	0.47	<2.2e-16	0.58	<2.2e-16	NA	NA	0.44	<2.2e-16	0.58	<2.2e-16	NA	NA	NA	NA	NA	NA	0.51	<2.2e-16	0.41	<2.2e-16	0.66	<2.2e-16	NA	NA	0.47	<2.2e-16	0.54	<2.2e-16	0.24	<2.2e-16	0.63	<2.2e-16	0.17	<2.2e-16	0.68	<2.2e-16	0.45	<2.2e-16	0.7	<2.2e-16	0.72	<2.2e-16	0.59	<2.2e-16	0.71	<2.2e-16
HMGN3	K562	Transcript	protein coding	0.58	<2.2e-16	0.63	<2.2e-16	NA	NA	0.55	<2.2e-16	0.65	<2.2e-16	NA	NA	NA	NA	NA	NA	0.61	<2.2e-16	0.42	<2.2e-16	0.82	<2.2e-16	NA	NA	0.46	<2.2e-16	0.57	<2.2e-16	0	0.8	0.72	<2.2e-16	-0.05	7e-14	0.94	<2.2e-16	0.48	<2.2e-16	0.87	<2.2e-16	0.74	<2.2e-16	0.71	<2.2e-16	0.65	<2.2e-16
IRF1	K562	Transcript	protein coding	0.87	<2.2e-16	0.74	<2.2e-16	NA	NA	0.58	<2.2e-16	0.86	<2.2e-16	NA	NA	NA	NA	NA	NA	0.54	<2.2e-16	0.83	<2.2e-16	0.64	<2.2e-16	NA	NA	0.8	<2.2e-16	0.83	<2.2e-16	0	0.7	0.53	<2.2e-16	-0.04	3e-08	0.56	<2.2e-16	0.54	<2.2e-16	0.72	<2.2e-16	0.57	<2.2e-16	0.57	<2.2e-16	0.42	<2.2e-16
JARID1B-PLU1	K562	Transcript	protein coding	0.57	<2.2e-16	0.62	<2.2e-16	NA	NA	0.57	<2.2e-16	0.61	<2.2e-16	NA	NA	NA	NA	NA	NA	0.7	<2.2e-16	0.42	<2.2e-16	0.74	<2.2e-16	NA	NA	0.42	<2.2e-16	0.55	<2.2e-16	0.05	2e-12	0.79	<2.2e-16	-0.01	0.4	0.84	<2.2e-16	0.59	<2.2e-16	0.8	<2.2e-16	0.89	<2.2e-16	0.72	<2.2e-16	0.65	<2.2e-16
JUN	K562	Transcript	protein coding	0.85	<2.2e-16	0.83	<2.2e-16	NA	NA	0.76	<2.2e-16	0.85	<2.2e-16	NA	NA	NA	NA	NA	NA	0.67	<2.2e-16	0.73	<2.2e-16	0.86	<2.2e-16	NA	NA	0.72	<2.2e-16	0.82	<2.2e-16	0.01	0.05	0.78	<2.2e-16	-0.04	3e-07	0.82	<2.2e-16	0.65	<2.2e-16	0.91	<2.2e-16	0.76	<2.2e-16	0.72	<2.2e-16	0.65	<2.2e-16
KAP1	K562	Transcript	protein coding	0.82	<2.2e-16	0.61	<2.2e-16	NA	NA	0.5	<2.2e-16	0.79	<2.2e-16	NA	NA	NA	NA	NA	NA	0.48	<2.2e-16	0.77	<2.2e-16	0.5	<2.2e-16	NA	NA	0.73	<2.2e-16	0.73	<2.2e-16	-0.05	2e-10	0.49	<2.2e-16	-0.07	<2.2e-16	0.45	<2.2e-16	0.46	<2.2e-16	0.58	<2.2e-16	0.48	<2.2e-16	0.46	<2.2e-16	0.36	<2.2e-16
KAT2B-PCAF	K562	Transcript	protein coding	0.6	<2.2e-16	0.61	<2.2e-16	NA	NA	0.49	<2.2e-16	0.64	<2.2e-16	NA	NA	NA	NA	NA	NA	0.51	<2.2e-16	0.55	<2.2e-16	0.61	<2.2e-16	NA	NA	0.56	<2.2e-16	0.62	<2.2e-16	0.24	<2.2e-16	0.63	<2.2e-16	0.2	<2.2e-16	0.58	<2.2e-16	0.52	<2.2e-16	0.64	<2.2e-16	0.69	<2.2e-16	0.54	<2.2e-16	0.73	<2.2e-16
KDM1A-LSD1	K562	Transcript	protein coding	0.62	<2.2e-16	0.6	<2.2e-16	NA	NA	0.56	<2.2e-16	0.61	<2.2e-16	NA	NA	NA	NA	NA	NA	0.46	<2.2e-16	0.54	<2.2e-16	0.66	<2.2e-16	NA	NA	0.53	<2.2e-16	0.62	<2.2e-16	0.15	<2.2e-16	0.7	<2.2e-16	0.11	<2.2e-16	0.63	<2.2e-16	0.57	<2.2e-16	0.71	<2.2e-16	0.66	<2.2e-16	0.52	<2.2e-16	0.8	<2.2e-16
MAFF	K562	Transcript	protein coding	0.86	<2.2e-16	0.72	<2.2e-16	NA	NA	0.6	<2.2e-16	0.88	<2.2e-16	NA	NA	NA	NA	NA	NA	0.56	<2.2e-16	0.82	<2.2e-16	0.63	<2.2e-16	NA	NA	0.79	<2.2e-16	0.83	<2.2e-16	0.03	4e-05	0.53	<2.2e-16	-0.01	0.2	0.54	<2.2e-16	0.56	<2.2e-16	0.71	<2.2e-16	0.59	<2.2e-16	0.59	<2.2e-16	0.46	<2.2e-16
MAFK	K562	Transcript	protein coding	0.87	<2.2e-16	0.79	<2.2e-16	NA	NA	0.65	<2.2e-16	0.9	<2.2e-16	NA	NA	NA	NA	NA	NA	0.59	<2.2e-16	0.8	<2.2e-16	0.74	<2.2e-16	NA	NA	0.79	<2.2e-16	0.84	<2.2e-16	0.03	4e-06	0.64	<2.2e-16	-0.02	0.02	0.67	<2.2e-16	0.59	<2.2e-16	0.81	<2.2e-16	0.66	<2.2e-16	0.64	<2.2e-16	0.56	<2.2e-16
MAX	K562	Transcript	protein coding	0.64	<2.2e-16	0.69	<2.2e-16	NA	NA	0.62	<2.2e-16	0.66	<2.2e-16	NA	NA	NA	NA	NA	NA	0.67	<2.2e-16	0.49	<2.2e-16	0.86	<2.2e-16	NA	NA	0.48	<2.2e-16	0.61	<2.2e-16	-0.02	7	0.81	<2.2e-16	-0.07	<2.2e-16	0.87	<2.2e-16	0.57	<2.2e-16	0.83	<2.2e-16	0.77	<2.2e-16	0.71	<2.2e-16	0.6	<2.2e-16
MAZ	K562	Transcript	protein coding	0.66	<2.2e-16	0.71	<2.2e-16	NA	NA	0.63	<2.2e-16	0.69	<2.2e-16	NA	NA	NA	NA	NA	NA	0.65	<2.2e-16	0.5	<2.2e-16	0.85	<2.2e-16	NA	NA	0.51	<2.2e-16	0.63	<2.2e-16	-0.01	0.4	0.78	<2.2e-16	-0.06	<2.2e-16	0.9	<2.2e-16	0.55	<2.2e-16	0.88	<2.2e-16	0.76	<2.2e-16	0.73	<2.2e-16	0.66	<2.2e-16
MEF2A	K562	Transcript	protein coding	0.76	<2.2e-16	0.66	<2.2e-16	NA	NA	0.66	<2.2e-16	0.72	<2.2e-16	NA	NA	NA	NA	NA	NA	0.66	<2.2e-16	0.67	<2.2e-16	0.62	<2.2e-16	NA	NA	0.64	<2.2e-16	0.7	<2.2e-16	0	0.9	0.64	<2.2e-16	-0.04	9e-07	0.59	<2.2e-16	0.63	<2.2e-16	0.71	<2.2e-16	0.64	<2.2e-16	0.58	<2.2e-16	0.49	<2.2e-16
MXI1	K562	Transcript	protein coding	0.82	<2.2e-16	0.78	<2.2e-16	NA	NA	0.66	<2.2e-16	0.85	<2.2e-16	NA	NA	NA	NA	NA	NA	0.73	<2.2e-16	0.7	<2.2e-16	0.81	<2.2e-16	NA	NA	0.68	<2.2e-16	0.77	<2.2e-16	-0.02	0.02	0.73	<2.2e-16	-0.07	<2.2e-16	0.8	<2.2e-16	0.62	<2.2e-16	0.87	<2.2e-16	0.79	<2.2e-16	0.75	<2.2e-16	0.56	<2.2e-16
MYC	K562	Transcript	protein coding	0.71	<2.2e-16	0.69	<2.2e-16	NA	NA	0.63	<2.2e-16	0.72	<2.2e-16	NA	NA	NA	NA	NA	NA	0.72	<2.2e-16	0.57	<2.2e-16	0.8	<2.2e-16	NA	NA	0.55	<2.2e-16	0.67	<2.2e-16	0	0.9	0.8	<2.2e-16	-0.05	4e-13	0.83	<2.2e-16	0.62	<2.2e-16	0.83	<2.2e-16	0.84	<2.2e-16	0.72	<2.2e-16	0.62	<2.2e-16
NCOR1	K562	Transcript	protein coding	0.53	<2.2e-16	0.52	<2.2e-16	NA	NA	0.48	<2.2e-16	0.53	<2.2e-16	NA	NA	NA	NA	NA	NA	0.48	<2.2e-16	0.44	<2.2e-16	0.56	<2.2e-16	NA	NA	0.44	<2.2e-16	0.51	<2.2e-16	0.21	<2.2e-16	0.62	<2.2e-16	0.18	<2.2e-16	0.56	<2.2e-16	0.51	<2.2e-16	0.58	<2.2e-16	0.68	<2.2e-16	0.48	<2.2e-16	0.74	<2.2e-16
NFE2	K562	Transcript	protein coding	0.62	<2.2e-16	0.69	<2.2e-16	NA	NA	0.54	<2.2e-16	0.73	<2.2e-16	NA	NA	NA	NA	NA	NA	0.5	<2.2e-16	0.6	<2.2e-16	0.76	<2.2e-16	NA	NA	0.63	<2.2e-16	0.71	<2.2e-16	0.08	<2.2e-16	0.6	<2.2e-16	0.03	0.0003	0.68	<2.2e-16	0.46	<2.2e-16	0.79	<2.2e-16	0.61	<2.2e-16	0.62	<2.2e-16	0.58	<2.2e-16
NFYA	K562	Transcript	protein coding	0.68	<2.2e-16	0.7	<2.2e-16	NA	NA	0.55	<2.2e-16	0.68	<2.2e-16	NA	NA	NA	NA	NA	NA	0.53	<2.2e-16	0.6	<2.2e-16	0.66	<2.2e-16	NA	NA	0.58	<2.2e-16	0.67	<2.2e-16	0	0.7	0.61	<2.2e-16	-0.05	5e-12	0.63	<2.2e-16	0.53	<2.2e-16	0.73	<2.2e-16	0.61	<2.2e-16	0.65	<2.2e-16	0.48	<2.2e-16
NFYB	K562	Transcript	protein coding	0.36	<2.2e-16	0.42	<2.2e-16	NA	NA	0.33	<2.2e-16	0.36	<2.2e-16	NA	NA	NA	NA	NA	NA	0.34	<2.2e-16	0.29	<2.2e-16	0.44	<2.2e-16	NA	NA	0.28	<2.2e-16	0.36	<2.2e-16	-0.02	0.0006	0.42	<2.2e-16	-0.05	5e-14	0.44	<2.2e-16	0.34	<2.2e-16	0.46	<2.2e-16	0.41	<2.2e-16	0.46	<2.2e-16	0.31	<2.2e-16
NR2F2	K562	Transcript	protein coding	0.68	<2.2e-16	0.68	<2.2e-16	NA	NA	0.69	<2.2e-16	0.65	<2.2e-16	NA	NA	NA	NA	NA	NA	0.67	<2.2e-16	0.55	<2.2e-16	0.73	<2.2e-16	NA	NA	0.52	<2.2e-16	0.64	<2.2e-16	0	1	0.87	<2.2e-16	-0.04	6e-10	0.72	<2.2e-16	0.73	<2.2e-16	0.81	<2.2e-16	0.75	<2.2e-16	0.64	<2.2e-16	0.66	<2.2e-16
NRF1	K562	Transcript	protein coding	0.79	<2.2e-16	0.69	<2.2e-16	NA	NA	0.54	<2.2e-16	0.8	<2.2e-16	NA	NA	NA	NA	NA	NA	0.51	<2.2e-16	0.78	<2.2e-16	0.58	<2.2e-16	NA	NA	0.74	<2.2e-16	0.77	<2.2e-16	0.02	0.04	0.5	<2.2e-16	-0.02	0.02	0.5	<2.2e-16	0.5	<2.2e-16	0.63	<2.2e-16	0.52	<2.2e-16	0.53	<2.2e-16	0.37	<2.2e-16
P300	K562	Transcript	protein coding	0.89	<2.2e-16	0.7	<2.2e-16	NA	NA	0.56	<2.2e-16	0.88	<2.2e-16	NA	NA	NA	NA	NA	NA	0.53	<2.2e-16	0.84	<2.2e-16	0.59	<2.2e-16	NA	NA	0.81	<2.2e-16	0.82	<2.2e-16	0.01	0.2	0.49	<2.2e-16	-0.02	0.0007	0.52	<2.2e-16	0.52	<2.2e-16	0.67	<2.2e-16	0.55	<2.2e-16	0.53	<2.2e-16	0.4	<2.2e-16
PHF8	K562	Transcript	protein coding	0.53	<2.2e-16	0.59	<2.2e-16	NA	NA	0.51	<2.2e-16	0.55	<2.2e-16	NA	NA	NA	NA	NA	NA	0.65	<2.2e-16	0.39	<2.2e-16	0.66	<2.2e-16	NA	NA	0.38	<2.2e-16	0.51	<2.2e-16	-0.03	0.0002	0.74	<2.2e-16	-0.08	<2.2e-16	0.75	<2.2e-16	0.54	<2.2e-16	0.7	<2.2e-16	0.79	<2.2e-16	0.66	<2.2e-16	0.53	<2.2e-16
PML	K562	Transcript	protein coding	0.65	<2.2e-16	0.63	<2.2e-16	NA	NA	0.65	<2.2e-16	0.64	<2.2e-16	NA	NA	NA	NA	NA	NA	0.82	<2.2e-16	0.51	<2.2e-16	0.64	<2.2e-16	NA	NA	0.47	<2.2e-16	0.59	<2.2e-16	-0.01	0.07	0.71	<2.2e-16	-0.05	2e-13	0.7	<2.2e-16	0.68	<2.2e-16	0.76	<2.2e-16	0.77	<2.2e-16	0.69	<2.2e-16	0.47	<2.2e-16
POL2	K562	Transcript	protein coding	0.58	<2.2e-16	0.59	<2.2e-16	NA	NA	0.58	<2.2e-16	0.6	<2.2e-16	NA	NA	NA	NA	NA	NA	0.78	<2.2e-16	0.42	<2.2e-16	0.65	<2.2e-16	NA	NA	0.4	<2.2e-16	0.53	<2.2e-16	-0.05	2e-13	0.7	<2.2e-16	-0.1	<2.2e-16	0.78	<2.2e-16	0.58	<2.2e-16	0.78	<2.2e-16	0.81	<2.2e-16	0.7	<2.2e-16	0.48	<2.2e-16
POL3	K562	Transcript	protein coding	0.57	<2.2e-16	0.56	<2.2e-16	NA	NA	0.42	<2.2e-16	0.61	<2.2e-16	NA	NA	NA	NA	NA	NA	0.33	<2.2e-16	0.68	<2.2e-16	0.46	<2.2e-16	NA	NA	0.66	<2.2e-16	0.69	<2.2e-16	0.05	3e-12	0.37	<2.2e-16	0.01	0.2	0.35	<2.2e-16	0.38	<2.2e-16	0.52	<2.2e-16	0.39	<2.2e-16	0.38	<2.2e-16	0.33	<2.2e-16
RAD21	K562	Transcript	protein coding	0.73	<2.2e-16	0.68	<2.2e-16	NA	NA	0.55	<2.2e-16	0.76	<2.2e-16	NA	NA	NA	NA	NA	NA	0.5	<2.2e-16	0.74	<2.2e-16	0.64	<2.2e-16	NA	NA	0.71	<2.2e-16	0.78	<2.2e-16	0.08	<2.2e-16	0.57	<2.2e-16	0.03	4e-06	0.55	<2.2e-16	0.51	<2.2e-16	0.7	<2.2e-16	0.55	<2.2e-16	0.54	<2.2e-16	0.5	<2.2e-16
RBBP5	K562	Transcript	protein coding	0.63	<2.2e-16	0.66	<2.2e-16	NA	NA	0.57	<2.2e-16	0.65	<2.2e-16	NA	NA	NA	NA	NA	NA	0.67	<2.2e-16	0.49	<2.2e-16	0.75	<2.2e-16	NA	NA	0.49	<2.2e-16	0.61	<2.2e-16	0.05	2e-10	0.79	<2.2e-16	-0.01	0.3	0.82	<2.2e-16	0.59	<2.2e-16	0.8	<2.2e-16	0.89	<2.2e-16	0.7	<2.2e-16	0.68	<2.2e-16
RDBP-NELF-E	K562	Transcript	protein coding	0.73	<2.2e-16	0.73	<2.2e-16	NA	NA	0.56	<2.2e-16	0.8	<2.2e-16	NA	NA	NA	NA	NA	NA	0.62	<2.2e-16	0.71	<2.2e-16	0.72	<2.2e-16	NA	NA	0.71	<2.2e-16	0.79	<2.2e-16	0.08	<2.2e-16	0.63	<2.2e-16	0.02	0.02	0.7	<2.2e-16	0.52	<2.2e-16	0.8	<2.2e-16	0.71	<2.2e-16	0.68	<2.2e-16	0.55	<2.2e-16
REST	K562	Transcript	protein coding	0.31	<2.2e-16	0.33	<2.2e-16	NA	NA	0.33	<2.2e-16	0.31	<2.2e-16	NA	NA	NA	NA	NA	NA	0.36	<2.2e-16	0.22	<2.2e-16	0.38	<2.2e-16	NA	NA	0.21	<2.2e-16	0.28	<2.2e-16	0.06	<2.2e-16	0.42	<2.2e-16	0.02	0.03	0.4	<2.2e-16	0.31	<2.2e-16	0.41	<2.2e-16	0.39	<2.2e-16	0.35	<2.2e-16	0.29	<2.2e-16
RFX5	K562	Transcript	protein coding	0.87	<2.2e-16	0.76	<2.2e-16	NA	NA	0.59	<2.2e-16	0.88	<2.2e-16	NA	NA	NA	NA	NA	NA	0.6	<2.2e-16	0.8	<2.2e-16	0.66	<2.2e-16	NA	NA	0.78	<2.2e-16	0.81	<2.2e-16	0.03	2e-05	0.57	<2.2e-16	-0.01	0.2	0.61	<2.2e-16	0.55	<2.2e-16	0.74	<2.2e-16	0.63	<2.2e-16	0.62	<2.2e-16	0.47	<2.2e-16
RNF2	K562	Transcript	protein coding	0.25	<2.2e-16	0.28	<2.2e-16	NA	NA	0.21	<2.2e-16	0.27	<2.2e-16	NA	NA	NA	NA	NA	NA	0.24	<2.2e-16	0.18	<2.2e-16	0.35	<2.2e-16	NA	NA	0.2	<2.2e-16	0.24	<2.2e-16	0.77	<2.2e-16	0.37	<2.2e-16	0.75	<2.2e-16	0.34	<2.2e-16	0.25	<2.2e-16	0.31	<2.2e-16	0.41	<2.2e-16	0.26	<2.2e-16	0.49	<2.2e-16
RPC155	K562	Transcript	protein coding	0.81	<2.2e-16	0.71	<2.2e-16	NA	NA	0.61	<2.2e-16	0.8	<2.2e-16	NA	NA	NA	NA	NA	NA	0.53	<2.2e-16	0.82	<2.2e-16	0.65	<2.2e-16	NA	NA	0.78	<2.2e-16	0.83	<2.2e-16	0.04	3e-09	0.58	<2.2e-16	0	0.7	0.58	<2.2e-16	0.53	<2.2e-16	0.72	<2.2e-16	0.58	<2.2e-16	0.56	<2.2e-16	0.51	<2.2e-16
SAP30	K562	Transcript	protein coding	0.62	<2.2e-16	0.68	<2.2e-16	NA	NA	0.57	<2.2e-16	0.66	<2.2e-16	NA	NA	NA	NA	NA	NA	0.65	<2.2e-16	0.51	<2.2e-16	0.75	<2.2e-16	NA	NA	0.51	<2.2e-16	0.62	<2.2e-16	0.05	5e-14	0.77	<2.2e-16	0	1	0.78	<2.2e-16	0.58	<2.2e-16	0.78	<2.2e-16	0.85	<2.2e-16	0.68	<2.2e-16	0.66	<2.2e-16
SETDB1	K562	Transcript	protein coding	0.46	<2.2e-16	0.6	<2.2e-16	NA	NA	0.45	<2.2e-16	0.57	<2.2e-16	NA	NA	NA	NA	NA	NA	0.47	<2.2e-16	0.42	<2.2e-16	0.66	<2.2e-16	NA	NA	0.48	<2.2e-16	0.56	<2.2e-16	0.22	<2.2e-16	0.62	<2.2e-16	0.15	<2.2e-16	0.64	<2.2e-16	0.45	<2.2e-16	0.69	<2.2e-16	0.69	<2.2e-16	0.56	<2.2e-16	0.72	<2.2e-16
SIN3AK20	K562	Transcript	protein coding	0.59	<2.2e-16	0.64	<2.2e-16	NA	NA	0.58	<2.2e-16	0.62	<2.2e-16	NA	NA	NA	NA	NA	NA	0.73	<2.2e-16	0.45	<2.2e-16	0.73	<2.2e-16	NA	NA	0.44	<2.2e-16	0.56	<2.2e-16	-0.05	9e-11	0.73	<2.2e-16	-0.09	<2.2e-16	0.8	<2.2e-16	0.55	<2.2e-16	0.78	<2.2e-16	0.79	<2.2e-16	0.7	<2.2e-16	0.51	<2.2e-16
SIRT6	K562	Transcript	protein coding	0.9	<2.2e-16	0.72	<2.2e-16	NA	NA	0.63	<2.2e-16	0.84	<2.2e-16	NA	NA	NA	NA	NA	NA	0.57	<2.2e-16	0.88	<2.2e-16	0.65	<2.2e-16	NA	NA	0.81	<2.2e-16	0.87	<2.2e-16	0.01	0.2	0.59	<2.2e-16	-0.01	0.05	0.56	<2.2e-16	0.62	<2.2e-16	0.71	<2.2e-16	0.61	<2.2e-16	0.55	<2.2e-16	0.49	<2.2e-16
SIX5	K562	Transcript	protein coding	0.28	<2.2e-16	0.4	<2.2e-16	NA	NA	0.32	<2.2e-16	0.29	<2.2e-16	NA	NA	NA	NA	NA	NA	0.39	<2.2e-16	0.24	<2.2e-16	0.36	<2.2e-16	NA	NA	0.22	<2.2e-16	0.29	<2.2e-16	-0.05	4e-14	0.38	<2.2e-16	-0.07	<2.2e-16	0.32	<2.2e-16	0.29	<2.2e-16	0.36	<2.2e-16	0.31	<2.2e-16	0.37	<2.2e-16	0.22	<2.2e-16
SMARCA4-BRG1	K562	Transcript	protein coding	0.87	<2.2e-16	0.71	<2.2e-16	NA	NA	0.67	<2.2e-16	0.85	<2.2e-16	NA	NA	NA	NA	NA	NA	0.73	<2.2e-16	0.75	<2.2e-16	0.71	<2.2e-16	NA	NA	0.71	<2.2e-16	0.79	<2.2e-16	-0.06	<2.2e-16	0.68	<2.2e-16	-0.1	<2.2e-16	0.74	<2.2e-16	0.64	<2.2e-16	0.84	<2.2e-16	0.77	<2.2e-16	0.71	<2.2e-16	0.56	<2.2e-16
SMARCB1-INI1	K562	Transcript	protein coding	0.89	<2.2e-16	0.73	<2.2e-16	NA	NA	0.66	<2.2e-16	0.88	<2.2e-16	NA	NA	NA	NA	NA	NA	0.7	<2.2e-16	0.78	<2.2e-16	0.73	<2.2e-16	NA	NA	0.74	<2.2e-16	0.82	<2.2e-16	-0.04	9e-10	0.67	<2.2e-16	-0.08	<2.2e-16	0.74	<2.2e-16	0.63	<2.2e-16	0.85	<2.2e-16	0.76	<2.2e-16	0.7	<2.2e-16	0.57	<2.2e-16
SMC3	K562	Transcript	protein coding	0.68	<2.2e-16	0.7	<2.2e-16	NA	NA	0.56	<2.2e-16	0.75	<2.2e-16	NA	NA	NA	NA	NA	NA	0.58	<2.2e-16	0.59	<2.2e-16	0.78	<2.2e-16	NA	NA	0.62	<2.2e-16	0.7	<2.2e-16	0.08	<2.2e-16	0.68	<2.2e-16	0.02	0.04	0.75	<2.2e-16	0.5	<2.2e-16	0.83	<2.2e-16	0.67	<2.2e-16	0.67	<2.2e-16	0.6	<2.2e-16
SP1	K562	Transcript	protein coding	0.51	<2.2e-16	0.58	<2.2e-16	NA	NA	0.53	<2.2e-16	0.49	<2.2e-16	NA	NA	NA	NA	NA	NA	0.57	<2.2e-16	0.38	<2.2e-16	0.59	<2.2e-16	NA	NA	0.36	<2.2e-16	0.46	<2.2e-16	-0.02	0.03	0.63	<2.2e-16	-0.06	8e-15	0.62	<2.2e-16	0.51	<2.2e-16	0.62	<2.2e-16	0.58	<2.2e-16	0.6	<2.2e-16	0.44	<2.2e-16
SP2	K562	Transcript	protein coding	0.44	<2.2e-16	0.5	<2.2e-16	NA	NA	0.4	<2.2e-16	0.45	<2.2e-16	NA	NA	NA	NA	NA	NA	0.45	<2.2e-16	0.4	<2.2e-16	0.48	<2.2e-16	NA	NA	0.38	<2.2e-16	0.46	<2.2e-16	0.03	7e-05	0.48	<2.2e-16	-0.01	0.5	0.45	<2.2e-16	0.39	<2.2e-16	0.52	<2.2e-16	0.46	<2.2e-16	0.48	<2.2e-16	0.38	<2.2e-16
SPI1-PU1	K562	Transcript	protein coding	0.23	<2.2e-16	0.27	<2.2e-16	NA	NA	0.3	<2.2e-16	0.21	<2.2e-16	NA	NA	NA	NA	NA	NA	0.3	<2.2e-16	0.18	<2.2e-16	0.28	<2.2e-16	NA	NA	0.15	<2.2e-16	0.22	<2.2e-16	0.1	<2.2e-16	0.44	<2.2e-16	0.09	<2.2e-16	0.26	<2.2e-16	0.37	<2.2e-16	0.29	<2.2e-16	0.38	<2.2e-16	0.25	<2.2e-16	0.41	<2.2e-16
SRF	K562	Transcript	protein coding	0.62	<2.2e-16	0.73	<2.2e-16	NA	NA	0.61	<2.2e-16	0.62	<2.2e-16	NA	NA	NA	NA	NA	NA	0.61	<2.2e-16	0.53	<2.2e-16	0.64	<2.2e-16	NA	NA	0.5	<2.2e-16	0.61	<2.2e-16	-0.01	0.4	0.66	<2.2e-16	-0.04	5e-09	0.62	<2.2e-16	0.56	<2.2e-16	0.7	<2.2e-16	0.61	<2.2e-16	0.58	<2.2e-16	0.48	<2.2e-16
STAT1	K562	Transcript	protein coding	0.84	<2.2e-16	0.79	<2.2e-16	NA	NA	0.66	<2.2e-16	0.84	<2.2e-16	NA	NA	NA	NA	NA	NA	0.63	<2.2e-16	0.8	<2.2e-16	0.77	<2.2e-16	NA	NA	0.77	<2.2e-16	0.86	<2.2e-16	0.02	0.0008	0.7	<2.2e-16	-0.03	0.0001	0.71	<2.2e-16	0.63	<2.2e-16	0.85	<2.2e-16	0.71	<2.2e-16	0.67	<2.2e-16	0.58	<2.2e-16
STAT2	K562	Transcript	protein coding	0.75	<2.2e-16	0.78	<2.2e-16	NA	NA	0.65	<2.2e-16	0.78	<2.2e-16	NA	NA	NA	NA	NA	NA	0.65	<2.2e-16	0.68	<2.2e-16	0.82	<2.2e-16	NA	NA	0.67	<2.2e-16	0.78	<2.2e-16	0.02	7	0.75	<2.2e-16	-0.04	6e-08	0.79	<2.2e-16	0.61	<2.2e-16	0.89	<2.2e-16	0.75	<2.2e-16	0.72	<2.2e-16	0.63	<2.2e-16
STAT5A	K562	Transcript	protein coding	0.62	<2.2e-16	0.56	<2.2e-16	NA	NA	0.59	<2.2e-16	0.56	<2.2e-16	NA	NA	NA	NA	NA	NA	0.55	<2.2e-16	0.53	<2.2e-16	0.51	<2.2e-16	NA	NA	0.48	<2.2e-16	0.56	<2.2e-16	0.08	<2.2e-16	0.66	<2.2e-16	0.05	2e-11	0.49	<2.2e-16	0.67	<2.2e-16	0.61	<2.2e-16	0.6	<2.2e-16	0.46	<2.2e-16	0.55	<2.2e-16
SUZ12	K562	Transcript	protein coding	0.09	<2.2e-16	0.18	<2.2e-16	NA	NA	0.11	<2.2e-16	0.15	<2.2e-16	NA	NA	NA	NA	NA	NA	0.15	<2.2e-16	0.05	3e-14	0.22	<2.2e-16	NA	NA	0.11	<2.2e-16	0.12	<2.2e-16	0.65	<2.2e-16	0.23	<2.2e-16	0.6	<2.2e-16	0.19	<2.2e-16	0.15	<2.2e-16	0.2	<2.2e-16	0.29	<2.2e-16	0.17	<2.2e-16	0.36	<2.2e-16
TAF1	K562	Transcript	protein coding	0.6	<2.2e-16	0.59	<2.2e-16	NA	NA	0.58	<2.2e-16	0.59	<2.2e-16	NA	NA	NA	NA	NA	NA	0.75	<2.2e-16	0.46	<2.2e-16	0.63	<2.2e-16	NA	NA	0.42	<2.2e-16	0.54	<2.2e-16	-0.05	8e-11	0.69	<2.2e-16	-0.09	<2.2e-16	0.71	<2.2e-16	0.59	<2.2e-16	0.71	<2.2e-16	0.8	<2.2e-16	0.68	<2.2e-16	0.43	<2.2e-16
TAF7	K562	Transcript	protein coding	0.63	<2.2e-16	0.59	<2.2e-16	NA	NA	0.6	<2.2e-16	0.63	<2.2e-16	NA	NA	NA	NA	NA	NA	0.77	<2.2e-16	0.51	<2.2e-16	0.61	<2.2e-16	NA	NA	0.48	<2.2e-16	0.58	<2.2e-16	0.02	0.02	0.66	<2.2e-16	-0.02	2	0.66	<2.2e-16	0.62	<2.2e-16	0.72	<2.2e-16	0.75	<2.2e-16	0.65	<2.2e-16	0.47	<2.2e-16
TAL1	K562	Transcript	protein coding	0.74	<2.2e-16	0.65	<2.2e-16	NA	NA	0.62	<2.2e-16	0.72	<2.2e-16	NA	NA	NA	NA	NA	NA	0.64	<2.2e-16	0.61	<2.2e-16	0.67	<2.2e-16	NA	NA	0.58	<2.2e-16	0.67	<2.2e-16	-0.02	0.0009	0.66	<2.2e-16	-0.06	<2.2e-16	0.71	<2.2e-16	0.64	<2.2e-16	0.83	<2.2e-16	0.7	<2.2e-16	0.63	<2.2e-16	0.54	<2.2e-16
TBL1XR1-TBLR1	K562	Transcript	protein coding	0.81	<2.2e-16	0.8	<2.2e-16	NA	NA	0.66	<2.2e-16	0.87	<2.2e-16	NA	NA	NA	NA	NA	NA	0.71	<2.2e-16	0.71	<2.2e-16	0.85	<2.2e-16	NA	NA	0.72	<2.2e-16	0.81	<2.2e-16	0.04	3e-09	0.76	<2.2e-16	-0.02	9	0.86	<2.2e-16	0.61	<2.2e-16	0.94	<2.2e-16	0.81	<2.2e-16	0.77	<2.2e-16	0.66	<2.2e-16
TBP	K562	Transcript	protein coding	0.66	<2.2e-16	0.65	<2.2e-16	NA	NA	0.63	<2.2e-16	0.66	<2.2e-16	NA	NA	NA	NA	NA	NA	0.75	<2.2e-16	0.52	<2.2e-16	0.69	<2.2e-16	NA	NA	0.48	<2.2e-16	0.6	<2.2e-16	0	0.6	0.72	<2.2e-16	-0.05	2e-12	0.75	<2.2e-16	0.61	<2.2e-16	0.76	<2.2e-16	0.83	<2.2e-16	0.71	<2.2e-16	0.51	<2.2e-16
TEAD4	K562	Transcript	protein coding	0.71	<2.2e-16	0.68	<2.2e-16	NA	NA	0.7	<2.2e-16	0.66	<2.2e-16	NA	NA	NA	NA	NA	NA	0.69	<2.2e-16	0.56	<2.2e-16	0.71	<2.2e-16	NA	NA	0.52	<2.2e-16	0.64	<2.2e-16	-0.01	0.3	0.78	<2.2e-16	-0.04	4e-09	0.75	<2.2e-16	0.7	<2.2e-16	0.82	<2.2e-16	0.74	<2.2e-16	0.64	<2.2e-16	0.57	<2.2e-16
THAP1	K562	Transcript	protein coding	0.36	<2.2e-16	0.45	<2.2e-16	NA	NA	0.38	<2.2e-16	0.37	<2.2e-16	NA	NA	NA	NA	NA	NA	0.43	<2.2e-16	0.29	<2.2e-16	0.44	<2.2e-16	NA	NA	0.29	<2.2e-16	0.36	<2.2e-16	-0.02	5	0.46	<2.2e-16	-0.05	2e-11	0.45	<2.2e-16	0.36	<2.2e-16	0.46	<2.2e-16	0.43	<2.2e-16	0.45	<2.2e-16	0.31	<2.2e-16
TR4-NR2C2	K562	Transcript	protein coding	0.61	<2.2e-16	0.63	<2.2e-16	NA	NA	0.42	<2.2e-16	0.71	<2.2e-16	NA	NA	NA	NA	NA	NA	0.38	<2.2e-16	0.71	<2.2e-16	0.57	<2.2e-16	NA	NA	0.73	<2.2e-16	0.75	<2.2e-16	0.08	<2.2e-16	0.42	<2.2e-16	0.03	0.0005	0.46	<2.2e-16	0.35	<2.2e-16	0.63	<2.2e-16	0.45	<2.2e-16	0.48	<2.2e-16	0.43	<2.2e-16
TRIM28	K562	Transcript	protein coding	0.79	<2.2e-16	0.71	<2.2e-16	NA	NA	0.7	<2.2e-16	0.77	<2.2e-16	NA	NA	NA	NA	NA	NA	0.74	<2.2e-16	0.68	<2.2e-16	0.74	<2.2e-16	NA	NA	0.64	<2.2e-16	0.75	<2.2e-16	0.01	0.1	0.85	<2.2e-16	-0.02	2	0.75	<2.2e-16	0.74	<2.2e-16	0.84	<2.2e-16	0.82	<2.2e-16	0.7	<2.2e-16	0.67	<2.2e-16
UBTF	K562	Transcript	protein coding	0.7	<2.2e-16	0.66	<2.2e-16	NA	NA	0.59	<2.2e-16	0.71	<2.2e-16	NA	NA	NA	NA	NA	NA	0.67	<2.2e-16	0.53	<2.2e-16	0.78	<2.2e-16	NA	NA	0.54	<2.2e-16	0.64	<2.2e-16	0.04	2e-09	0.74	<2.2e-16	-0.01	0.2	0.88	<2.2e-16	0.56	<2.2e-16	0.83	<2.2e-16	0.83	<2.2e-16	0.69	<2.2e-16	0.63	<2.2e-16
USF1	K562	Transcript	protein coding	0.38	<2.2e-16	0.4	<2.2e-16	NA	NA	0.39	<2.2e-16	0.39	<2.2e-16	NA	NA	NA	NA	NA	NA	0.39	<2.2e-16	0.31	<2.2e-16	0.6	<2.2e-16	NA	NA	0.29	<2.2e-16	0.37	<2.2e-16	-0.02	0.0007	0.45	<2.2e-16	-0.05	9e-12	0.45	<2.2e-16	0.36	<2.2e-16	0.47	<2.2e-16	0.4	<2.2e-16	0.41	<2.2e-16	0.32	<2.2e-16
USF2	K562	Transcript	protein coding	0.81	<2.2e-16	0.77	<2.2e-16	NA	NA	0.61	<2.2e-16	0.86	<2.2e-16	NA	NA	NA	NA	NA	NA	0.61	<2.2e-16	0.81	<2.2e-16	0.77	<2.2e-16	NA	NA	0.79	<2.2e-16	0.86	<2.2e-16	0.06	3e-16	0.63	<2.2e-16	0	0.8	0.66	<2.2e-16	0.56	<2.2e-16	0.82	<2.2e-16	0.69	<2.2e-16	0.67	<2.2e-16	0.55	<2.2e-16
WHSC1-NSD2	K562	Transcript	protein coding	0.58	<2.2e-16	0.6	<2.2e-16	NA	NA	0.52	<2.2e-16	0.65	<2.2e-16	NA	NA	NA	NA	NA	NA	0.49	<2.2e-16	0.54	<2.2e-16	0.7	<2.2e-16	NA	NA	0.57	<2.2e-16	0.66	<2.2e-16	-0.03	5e-05	0.63	<2.2e-16	-0.08	<2.2e-16	0.68	<2.2e-16	0.49	<2.2e-16	0.78	<2.2e-16	0.69	<2.2e-16	0.6	<2.2e-16	0.73	<2.2e-16
XRCC4	K562	Transcript	protein coding	0.76	<2.2e-16	0.73	<2.2e-16	NA	NA	0.56	<2.2e-16	0.82	<2.2e-16	NA	NA	NA	NA	NA	NA	0.54	<2.2e-16	0.8	<2.2e-16	0.68	<2.2e-16	NA	NA	0.79	<2.2e-16	0.85	<2.2e-16	0.08	<2.2e-16	0.58	<2.2e-16	0.02	0.0006	0.6	<2.2e-16	0.51	<2.2e-16	0.77	<2.2e-16	0.61	<2.2e-16	0.6	<2.2e-16	0.53	<2.2e-16
YY1	K562	Transcript	protein coding	0.47	<2.2e-16	0.52	<2.2e-16	NA	NA	0.49	<2.2e-16	0.48	<2.2e-16	NA	NA	NA	NA	NA	NA	0.59	<2.2e-16	0.36	<2.2e-16	0.54	<2.2e-16	NA	NA	0.33	<2.2e-16	0.44	<2.2e-16	-0.05	4e-12	0.59	<2.2e-16	-0.08	<2.2e-16	0.59	<2.2e-16	0.48	<2.2e-16	0.59	<2.2e-16	0.63	<2.2e-16	0.56	<2.2e-16	0.37	<2.2e-16
ZBTB33	K562	Transcript	protein coding	0.24	<2.2e-16	0.23	<2.2e-16	NA	NA	0.27	<2.2e-16	0.23	<2.2e-16	NA	NA	NA	NA	NA	NA	0.41	<2.2e-16	0.17	<2.2e-16	0.26	<2.2e-16	NA	NA	0.14	<2.2e-16	0.21	<2.2e-16	0.09	<2.2e-16	0.43	<2.2e-16	0.08	<2.2e-16	0.33	<2.2e-16	0.39	<2.2e-16	0.31	<2.2e-16	0.52	<2.2e-16	0.52	<2.2e-16	0.34	<2.2e-16
ZBTB7A	K562	Transcript	protein coding	0.43	<2.2e-16	0.47	<2.2e-16	NA	NA	0.46	<2.2e-16	0.47	<2.2e-16	NA	NA	NA	NA	NA	NA	0.49	<2.2e-16	0.27	<2.2e-16	0.68	<2.2e-16	NA	NA	0.3	<2.2e-16	0.41	<2.2e-16	-0.03	2e-05	0.66	<2.2e-16	-0.08	<2.2e-16	0.79	<2.2e-16	0.38	<2.2e-16	0.72	<2.2e-16	0.6	<2.2e-16	0.57	<2.2e-16	0.6	<2.2e-16
ZC3H11A	K562	Transcript	protein coding	0.89	<2.2e-16	0.81	<2.2e-16	NA	NA	0.67	<2.2e-16	0.91	<2.2e-16	NA	NA	NA	NA	NA	NA	0.65	<2.2e-16	0.81	<2.2e-16	0.81	<2.2e-16	NA	NA	0.81	<2.2e-16	0.88	<2.2e-16	0.03	4e-05	0.71	<2.2e-16	-0.02	2	0.77	<2.2e-16	0.6	<2.2e-16	0.89	<2.2e-16	0.73	<2.2e-16	0.71	<2.2e-16	0.62	<2.2e-16
ZMIZ1	K562	Transcript	protein coding	0.85	<2.2e-16	0.8	<2.2e-16	NA	NA	0.71	<2.2e-16	0.87	<2.2e-16	NA	NA	NA	NA	NA	NA	0.74	<2.2e-16	0.73	<2.2e-16	0.84	<2.2e-16	NA	NA	0.72	<2.2e-16	0.82	<2.2e-16	0	0.8	0.77	<2.2e-16	-0.05	3e-13	0.87	<2.2e-16	0.66	<2.2e-16	0.95	<2.2e-16	0.82	<2.2e-16	0.77	<2.2e-16	0.65	<2.2e-16
ZNF143	K562	Transcript	protein coding	0.56	<2.2e-16	0.6	<2.2e-16	NA	NA	0.51	<2.2e-16	0.59	<2.2e-16	NA	NA	NA	NA	NA	NA	0.55	<2.2e-16	0.49	<2.2e-16	0.61	<2.2e-16	NA	NA	0.48	<2.2e-16	0.56	<2.2e-16	-0.01	0.2	0.6	<2.2e-16	-0.05	9e-12	0.59	<2.2e-16	0.46	<2.2e-16	0.65	<2.2e-16	0.55	<2.2e-16	0.58	<2.2e-16	0.45	<2.2e-16
ZNF263	K562	Transcript	protein coding	0.38	<2.2e-16	0.52	<2.2e-16	NA	NA	0.41	<2.2e-16	0.5	<2.2e-16	NA	NA	NA	NA	NA	NA	0.42	<2.2e-16	0.32	<2.2e-16	0.68	<2.2e-16	NA	NA	0.39	<2.2e-16	0.49	<2.2e-16	0.08	<2.2e-16	0.57	<2.2e-16	0.01	0.06	0.68	<2.2e-16	0.34	<2.2e-16	0.72	<2.2e-16	0.56	<2.2e-16	0.56	<2.2e-16	0.58	<2.2e-16
ZNF274	K562	Transcript	protein coding	0.48	<2.2e-16	0.48	<2.2e-16	NA	NA	0.26	<2.2e-16	0.56	<2.2e-16	NA	NA	NA	NA	NA	NA	0.19	<2.2e-16	0.7	<2.2e-16	0.3	<2.2e-16	NA	NA	0.69	<2.2e-16	0.67	<2.2e-16	0.11	<2.2e-16	0.18	<2.2e-16	0.08	<2.2e-16	0.15	<2.2e-16	0.22	<2.2e-16	0.34	<2.2e-16	0.21	<2.2e-16	0.24	<2.2e-16	0.21	<2.2e-16
ZNF384	K562	Transcript	protein coding	0.8	<2.2e-16	0.73	<2.2e-16	NA	NA	0.67	<2.2e-16	0.79	<2.2e-16	NA	NA	NA	NA	NA	NA	0.63	<2.2e-16	0.72	<2.2e-16	0.76	<2.2e-16	NA	NA	0.69	<2.2e-16	0.79	<2.2e-16	0.01	0.4	0.7	<2.2e-16	-0.04	3e-07	0.73	<2.2e-16	0.62	<2.2e-16	0.83	<2.2e-16	0.69	<2.2e-16	0.65	<2.2e-16	0.6	<2.2e-16
DNASE HYPERSENSITIVITY	K562	Transcript	protein coding	0.54	<2.2e-16	0.64	<2.2e-16	NA	NA	0.55	<2.2e-16	0.6	<2.2e-16	NA	NA	NA	NA	NA	NA	0.56	<2.2e-16	0.39	<2.2e-16	0.8	<2.2e-16	NA	NA	0.43	<2.2e-16	0.54	<2.2e-16	0.03	2e-05	0.75	<2.2e-16	-0.03	7e-05	0.84	<2.2e-16	0.49	<2.2e-16	0.82	<2.2e-16	0.7	<2.2e-16	0.69	<2.2e-16	0.65	<2.2e-16
FOS (AND EGFP-FOS)	K562	Transcript	protein coding	0.63	<2.2e-16	0.65	<2.2e-16	NA	NA	0.59	<2.2e-16	0.6	<2.2e-16	NA	NA	NA	NA	NA	NA	0.52	<2.2e-16	0.54	<2.2e-16	0.66	<2.2e-16	NA	NA	0.52	<2.2e-16	0.61	<2.2e-16	-0.01	0.2	0.61	<2.2e-16	-0.05	2e-13	0.62	<2.2e-16	0.54	<2.2e-16	0.68	<2.2e-16	0.6	<2.2e-16	0.62	<2.2e-16	0.48	<2.2e-16
JUND (AND EGFP-JUND)	K562	Transcript	protein coding	0.78	<2.2e-16	0.8	<2.2e-16	NA	NA	0.81	<2.2e-16	0.76	<2.2e-16	NA	NA	NA	NA	NA	NA	0.65	<2.2e-16	0.64	<2.2e-16	0.84	<2.2e-16	NA	NA	0.62	<2.2e-16	0.73	<2.2e-16	0	0.6	0.78	<2.2e-16	-0.05	7e-13	0.81	<2.2e-16	0.66	<2.2e-16	0.87	<2.2e-16	0.74	<2.2e-16	0.69	<2.2e-16	0.63	<2.2e-16
GATA2 (AND EGFP-GATA2)	K562	Transcript	protein coding	0.4	<2.2e-16	0.33	<2.2e-16	NA	NA	0.42	<2.2e-16	0.3	<2.2e-16	NA	NA	NA	NA	NA	NA	0.36	<2.2e-16	0.3	<2.2e-16	0.31	<2.2e-16	NA	NA	0.25	<2.2e-16	0.32	<2.2e-16	0.08	<2.2e-16	0.51	<2.2e-16	0.08	<2.2e-16	0.33	<2.2e-16	0.55	<2.2e-16	0.42	<2.2e-16	0.44	<2.2e-16	0.28	<2.2e-16	0.45	<2.2e-16
ARID3A	K562	TTS	protein coding	NA	NA	0.77	<2.2e-16	NA	NA	0.62	<2.2e-16	0.84	<2.2e-16	NA	NA	NA	NA	NA	NA	0.54	<2.2e-16	0.79	<2.2e-16	0.66	<2.2e-16	NA	NA	0.73	<2.2e-16	0.79	<2.2e-16	0.04	1e-06	0.58	<2.2e-16	0	0.9	0.62	<2.2e-16	0.59	<2.2e-16	0.74	<2.2e-16	0.65	<2.2e-16	0.63	<2.2e-16	0.51	<2.2e-16
ATF1	K562	TTS	protein coding	0.77	<2.2e-16	NA	NA	NA	NA	0.67	<2.2e-16	0.75	<2.2e-16	NA	NA	NA	NA	NA	NA	0.52	<2.2e-16	0.69	<2.2e-16	0.75	<2.2e-16	NA	NA	0.66	<2.2e-16	0.75	<2.2e-16	0.08	<2.2e-16	0.65	<2.2e-16	0.03	2e-06	0.67	<2.2e-16	0.59	<2.2e-16	0.77	<2.2e-16	0.69	<2.2e-16	0.69	<2.2e-16	0.53	<2.2e-16
ATF3	K562	TTS	protein coding	0.62	<2.2e-16	0.67	<2.2e-16	NA	NA	NA	NA	0.54	<2.2e-16	NA	NA	NA	NA	NA	NA	0.52	<2.2e-16	0.48	<2.2e-16	0.6	<2.2e-16	NA	NA	0.42	<2.2e-16	0.52	<2.2e-16	0	0.6	0.64	<2.2e-16	-0.02	8	0.57	<2.2e-16	0.67	<2.2e-16	0.64	<2.2e-16	0.57	<2.2e-16	0.55	<2.2e-16	0.45	<2.2e-16
BACH1	K562	TTS	protein coding	0.84	<2.2e-16	0.75	<2.2e-16	NA	NA	0.54	<2.2e-16	NA	NA	NA	NA	NA	NA	NA	NA	0.54	<2.2e-16	0.79	<2.2e-16	0.67	<2.2e-16	NA	NA	0.76	<2.2e-16	0.82	<2.2e-16	0.05	4e-10	0.54	<2.2e-16	0	1	0.64	<2.2e-16	0.5	<2.2e-16	0.76	<2.2e-16	0.66	<2.2e-16	0.69	<2.2e-16	0.51	<2.2e-16
BCLAF1	K562	TTS	protein coding	0.54	<2.2e-16	0.52	<2.2e-16	NA	NA	0.52	<2.2e-16	0.54	<2.2e-16	NA	NA	NA	NA	NA	NA	NA	NA	0.42	<2.2e-16	0.54	<2.2e-16	NA	NA	0.38	<2.2e-16	0.48	<2.2e-16	-0.01	0.06	0.6	<2.2e-16	-0.03	2e-06	0.64	<2.2e-16	0.56	<2.2e-16	0.67	<2.2e-16	0.64	<2.2e-16	0.67	<2.2e-16	0.41	<2.2e-16
BDP1	K562	TTS	protein coding	0.79	<2.2e-16	0.69	<2.2e-16	NA	NA	0.48	<2.2e-16	0.79	<2.2e-16	NA	NA	NA	NA	NA	NA	0.42	<2.2e-16	NA	NA	0.54	<2.2e-16	NA	NA	0.8	<2.2e-16	0.86	<2.2e-16	0.06	<2.2e-16	0.43	<2.2e-16	0.03	3e-05	0.46	<2.2e-16	0.44	<2.2e-16	0.61	<2.2e-16	0.54	<2.2e-16	0.51	<2.2e-16	0.42	<2.2e-16
BHLHE40	K562	TTS	protein coding	0.66	<2.2e-16	0.75	<2.2e-16	NA	NA	0.6	<2.2e-16	0.67	<2.2e-16	NA	NA	NA	NA	NA	NA	0.54	<2.2e-16	0.54	<2.2e-16	NA	NA	NA	NA	0.54	<2.2e-16	0.65	<2.2e-16	0.04	4e-09	0.72	<2.2e-16	-0.01	0.5	0.8	<2.2e-16	0.52	<2.2e-16	0.81	<2.2e-16	0.72	<2.2e-16	0.75	<2.2e-16	0.59	<2.2e-16
BRF1	K562	TTS	protein coding	0.73	<2.2e-16	0.66	<2.2e-16	NA	NA	0.42	<2.2e-16	0.76	<2.2e-16	NA	NA	NA	NA	NA	NA	0.38	<2.2e-16	0.8	<2.2e-16	0.54	<2.2e-16	NA	NA	NA	NA	0.8	<2.2e-16	0.07	<2.2e-16	0.39	<2.2e-16	0.03	1e-05	0.46	<2.2e-16	0.38	<2.2e-16	0.6	<2.2e-16	0.51	<2.2e-16	0.5	<2.2e-16	0.41	<2.2e-16
BRF2	K562	TTS	protein coding	0.79	<2.2e-16	0.75	<2.2e-16	NA	NA	0.52	<2.2e-16	0.82	<2.2e-16	NA	NA	NA	NA	NA	NA	0.48	<2.2e-16	0.86	<2.2e-16	0.65	<2.2e-16	NA	NA	0.8	<2.2e-16	NA	NA	0.06	3e-15	0.52	<2.2e-16	0.01	0.05	0.59	<2.2e-16	0.49	<2.2e-16	0.73	<2.2e-16	0.63	<2.2e-16	0.63	<2.2e-16	0.51	<2.2e-16
CBX2	K562	TTS	protein coding	0.04	1e-06	0.08	<2.2e-16	NA	NA	0	0.6	0.05	4e-10	NA	NA	NA	NA	NA	NA	-0.01	0.06	0.06	<2.2e-16	0.04	4e-09	NA	NA	0.07	<2.2e-16	0.06	3e-15	NA	NA	0.02	2	0.91	<2.2e-16	-0.05	5e-12	0.04	6e-07	-0.02	0.04	0.09	<2.2e-16	-0.02	7	0.11	<2.2e-16
CBX3	K562	TTS	protein coding	0.58	<2.2e-16	0.65	<2.2e-16	NA	NA	0.64	<2.2e-16	0.54	<2.2e-16	NA	NA	NA	NA	NA	NA	0.6	<2.2e-16	0.43	<2.2e-16	0.72	<2.2e-16	NA	NA	0.39	<2.2e-16	0.52	<2.2e-16	0.02	2	NA	NA	-0.01	0.2	0.7	<2.2e-16	0.65	<2.2e-16	0.73	<2.2e-16	0.71	<2.2e-16	0.66	<2.2e-16	0.61	<2.2e-16
CBX8	K562	TTS	protein coding	0	0.9	0.03	2e-06	NA	NA	-0.02	8	0	1	NA	NA	NA	NA	NA	NA	-0.03	2e-06	0.03	3e-05	-0.01	0.5	NA	NA	0.03	1e-05	0.01	0.05	0.91	<2.2e-16	-0.01	0.2	NA	NA	-0.09	<2.2e-16	0.02	4	-0.06	<2.2e-16	0.05	3e-11	-0.06	<2.2e-16	0.08	<2.2e-16
CCNT2	K562	TTS	protein coding	0.62	<2.2e-16	0.67	<2.2e-16	NA	NA	0.57	<2.2e-16	0.64	<2.2e-16	NA	NA	NA	NA	NA	NA	0.64	<2.2e-16	0.46	<2.2e-16	0.8	<2.2e-16	NA	NA	0.46	<2.2e-16	0.59	<2.2e-16	-0.05	5e-12	0.7	<2.2e-16	-0.09	<2.2e-16	NA	NA	0.53	<2.2e-16	0.86	<2.2e-16	0.77	<2.2e-16	0.82	<2.2e-16	0.6	<2.2e-16
CEBPB	K562	TTS	protein coding	0.59	<2.2e-16	0.59	<2.2e-16	NA	NA	0.67	<2.2e-16	0.5	<2.2e-16	NA	NA	NA	NA	NA	NA	0.56	<2.2e-16	0.44	<2.2e-16	0.52	<2.2e-16	NA	NA	0.38	<2.2e-16	0.49	<2.2e-16	0.04	6e-07	0.65	<2.2e-16	0.02	4	0.53	<2.2e-16	NA	NA	0.62	<2.2e-16	0.6	<2.2e-16	0.53	<2.2e-16	0.45	<2.2e-16
CEBPD	K562	TTS	protein coding	0.74	<2.2e-16	0.77	<2.2e-16	NA	NA	0.64	<2.2e-16	0.76	<2.2e-16	NA	NA	NA	NA	NA	NA	0.67	<2.2e-16	0.61	<2.2e-16	0.81	<2.2e-16	NA	NA	0.6	<2.2e-16	0.73	<2.2e-16	-0.02	0.04	0.73	<2.2e-16	-0.06	<2.2e-16	0.86	<2.2e-16	0.62	<2.2e-16	NA	NA	0.78	<2.2e-16	0.85	<2.2e-16	0.63	<2.2e-16
CHD1	K562	TTS	protein coding	0.65	<2.2e-16	0.69	<2.2e-16	NA	NA	0.57	<2.2e-16	0.66	<2.2e-16	NA	NA	NA	NA	NA	NA	0.64	<2.2e-16	0.54	<2.2e-16	0.72	<2.2e-16	NA	NA	0.51	<2.2e-16	0.63	<2.2e-16	0.09	<2.2e-16	0.71	<2.2e-16	0.05	3e-11	0.77	<2.2e-16	0.6	<2.2e-16	0.78	<2.2e-16	NA	NA	0.75	<2.2e-16	0.66	<2.2e-16
CHD2	K562	TTS	protein coding	0.63	<2.2e-16	0.69	<2.2e-16	NA	NA	0.55	<2.2e-16	0.69	<2.2e-16	NA	NA	NA	NA	NA	NA	0.67	<2.2e-16	0.51	<2.2e-16	0.75	<2.2e-16	NA	NA	0.5	<2.2e-16	0.63	<2.2e-16	-0.02	7	0.66	<2.2e-16	-0.06	<2.2e-16	0.82	<2.2e-16	0.53	<2.2e-16	0.85	<2.2e-16	0.75	<2.2e-16	NA	NA	0.56	<2.2e-16
CHD4	K562	TTS	protein coding	0.51	<2.2e-16	0.53	<2.2e-16	NA	NA	0.45	<2.2e-16	0.51	<2.2e-16	NA	NA	NA	NA	NA	NA	0.41	<2.2e-16	0.42	<2.2e-16	0.59	<2.2e-16	NA	NA	0.41	<2.2e-16	0.51	<2.2e-16	0.11	<2.2e-16	0.61	<2.2e-16	0.08	<2.2e-16	0.6	<2.2e-16	0.45	<2.2e-16	0.63	<2.2e-16	0.66	<2.2e-16	0.56	<2.2e-16	NA	NA
CHD7	K562	TTS	protein coding	0.49	<2.2e-16	0.56	<2.2e-16	NA	NA	0.43	<2.2e-16	0.58	<2.2e-16	NA	NA	NA	NA	NA	NA	0.55	<2.2e-16	0.43	<2.2e-16	0.62	<2.2e-16	NA	NA	0.44	<2.2e-16	0.55	<2.2e-16	0.04	2e-08	0.54	<2.2e-16	0	0.9	0.71	<2.2e-16	0.46	<2.2e-16	0.76	<2.2e-16	0.73	<2.2e-16	0.76	<2.2e-16	0.64	<2.2e-16
COREST-RCOR1	K562	TTS	protein coding	0.79	<2.2e-16	0.82	<2.2e-16	NA	NA	0.63	<2.2e-16	0.82	<2.2e-16	NA	NA	NA	NA	NA	NA	0.57	<2.2e-16	0.71	<2.2e-16	0.83	<2.2e-16	NA	NA	0.7	<2.2e-16	0.8	<2.2e-16	0.05	7e-12	0.72	<2.2e-16	0	0.6	0.79	<2.2e-16	0.57	<2.2e-16	0.9	<2.2e-16	0.76	<2.2e-16	0.79	<2.2e-16	0.65	<2.2e-16
CREB1	K562	TTS	protein coding	0.69	<2.2e-16	0.77	<2.2e-16	NA	NA	0.64	<2.2e-16	0.67	<2.2e-16	NA	NA	NA	NA	NA	NA	0.68	<2.2e-16	0.56	<2.2e-16	0.69	<2.2e-16	NA	NA	0.51	<2.2e-16	0.63	<2.2e-16	0.01	0.04	0.73	<2.2e-16	-0.01	0.07	0.75	<2.2e-16	0.68	<2.2e-16	0.79	<2.2e-16	0.78	<2.2e-16	0.76	<2.2e-16	0.59	<2.2e-16
CREBBP	K562	TTS	protein coding	0.5	<2.2e-16	0.54	<2.2e-16	NA	NA	0.34	<2.2e-16	0.58	<2.2e-16	NA	NA	NA	NA	NA	NA	0.35	<2.2e-16	0.52	<2.2e-16	0.47	<2.2e-16	NA	NA	0.54	<2.2e-16	0.56	<2.2e-16	0.18	<2.2e-16	0.39	<2.2e-16	0.14	<2.2e-16	0.42	<2.2e-16	0.35	<2.2e-16	0.53	<2.2e-16	0.55	<2.2e-16	0.49	<2.2e-16	0.54	<2.2e-16
CTCF	K562	TTS	protein coding	0.33	<2.2e-16	0.35	<2.2e-16	NA	NA	0.32	<2.2e-16	0.32	<2.2e-16	NA	NA	NA	NA	NA	NA	0.25	<2.2e-16	0.26	<2.2e-16	0.43	<2.2e-16	NA	NA	0.26	<2.2e-16	0.33	<2.2e-16	0.03	5e-05	0.42	<2.2e-16	-0.01	0.5	0.37	<2.2e-16	0.27	<2.2e-16	0.4	<2.2e-16	0.31	<2.2e-16	0.36	<2.2e-16	0.33	<2.2e-16
CTCFL	K562	TTS	protein coding	0.45	<2.2e-16	0.53	<2.2e-16	NA	NA	0.43	<2.2e-16	0.48	<2.2e-16	NA	NA	NA	NA	NA	NA	0.46	<2.2e-16	0.36	<2.2e-16	0.64	<2.2e-16	NA	NA	0.36	<2.2e-16	0.47	<2.2e-16	0.03	0.0003	0.59	<2.2e-16	-0.02	0.04	0.65	<2.2e-16	0.37	<2.2e-16	0.64	<2.2e-16	0.57	<2.2e-16	0.61	<2.2e-16	0.47	<2.2e-16
CUX1	K562	TTS	protein coding	0.9	<2.2e-16	0.8	<2.2e-16	NA	NA	0.59	<2.2e-16	0.88	<2.2e-16	NA	NA	NA	NA	NA	NA	0.52	<2.2e-16	0.83	<2.2e-16	0.7	<2.2e-16	NA	NA	0.79	<2.2e-16	0.84	<2.2e-16	0.05	2e-11	0.56	<2.2e-16	0.01	0.5	0.64	<2.2e-16	0.54	<2.2e-16	0.77	<2.2e-16	0.66	<2.2e-16	0.66	<2.2e-16	0.53	<2.2e-16
E2F4	K562	TTS	protein coding	0.54	<2.2e-16	0.7	<2.2e-16	NA	NA	0.54	<2.2e-16	0.58	<2.2e-16	NA	NA	NA	NA	NA	NA	0.56	<2.2e-16	0.43	<2.2e-16	0.81	<2.2e-16	NA	NA	0.44	<2.2e-16	0.58	<2.2e-16	0.03	0.0005	0.73	<2.2e-16	-0.03	8e-05	0.84	<2.2e-16	0.48	<2.2e-16	0.81	<2.2e-16	0.76	<2.2e-16	0.8	<2.2e-16	0.6	<2.2e-16
E2F6	K562	TTS	protein coding	0.46	<2.2e-16	0.57	<2.2e-16	NA	NA	0.48	<2.2e-16	0.48	<2.2e-16	NA	NA	NA	NA	NA	NA	0.49	<2.2e-16	0.33	<2.2e-16	0.76	<2.2e-16	NA	NA	0.33	<2.2e-16	0.45	<2.2e-16	0.01	0.05	0.73	<2.2e-16	-0.02	0.0007	0.75	<2.2e-16	0.41	<2.2e-16	0.66	<2.2e-16	0.66	<2.2e-16	0.66	<2.2e-16	0.51	<2.2e-16
EGFP-HDAC8	K562	TTS	protein coding	0.37	<2.2e-16	0.54	<2.2e-16	NA	NA	0.43	<2.2e-16	0.44	<2.2e-16	NA	NA	NA	NA	NA	NA	0.39	<2.2e-16	0.31	<2.2e-16	0.66	<2.2e-16	NA	NA	0.33	<2.2e-16	0.47	<2.2e-16	0	0.5	0.57	<2.2e-16	-0.06	2e-14	0.66	<2.2e-16	0.37	<2.2e-16	0.71	<2.2e-16	0.61	<2.2e-16	0.65	<2.2e-16	0.56	<2.2e-16
EGFP-JUNB	K562	TTS	protein coding	0.49	<2.2e-16	0.63	<2.2e-16	NA	NA	0.65	<2.2e-16	0.48	<2.2e-16	NA	NA	NA	NA	NA	NA	0.46	<2.2e-16	0.36	<2.2e-16	0.7	<2.2e-16	NA	NA	0.36	<2.2e-16	0.5	<2.2e-16	0.01	0.05	0.67	<2.2e-16	-0.02	3	0.69	<2.2e-16	0.5	<2.2e-16	0.73	<2.2e-16	0.63	<2.2e-16	0.65	<2.2e-16	0.55	<2.2e-16
EGFP-NR4A1	K562	TTS	protein coding	0.06	<2.2e-16	0.3	<2.2e-16	NA	NA	0.19	<2.2e-16	0.18	<2.2e-16	NA	NA	NA	NA	NA	NA	0.17	<2.2e-16	0.09	<2.2e-16	0.42	<2.2e-16	NA	NA	0.15	<2.2e-16	0.25	<2.2e-16	0.02	9	0.31	<2.2e-16	-0.03	0.0003	0.41	<2.2e-16	0.14	<2.2e-16	0.46	<2.2e-16	0.35	<2.2e-16	0.42	<2.2e-16	0.36	<2.2e-16
EGR1	K562	TTS	protein coding	0.42	<2.2e-16	0.5	<2.2e-16	NA	NA	0.48	<2.2e-16	0.4	<2.2e-16	NA	NA	NA	NA	NA	NA	0.49	<2.2e-16	0.27	<2.2e-16	0.61	<2.2e-16	NA	NA	0.27	<2.2e-16	0.37	<2.2e-16	0	0.6	0.62	<2.2e-16	-0.02	0.0007	0.67	<2.2e-16	0.4	<2.2e-16	0.59	<2.2e-16	0.57	<2.2e-16	0.58	<2.2e-16	0.46	<2.2e-16
ELF1	K562	TTS	protein coding	0.43	<2.2e-16	0.57	<2.2e-16	NA	NA	0.48	<2.2e-16	0.41	<2.2e-16	NA	NA	NA	NA	NA	NA	0.49	<2.2e-16	0.31	<2.2e-16	0.61	<2.2e-16	NA	NA	0.28	<2.2e-16	0.4	<2.2e-16	0	0.9	0.65	<2.2e-16	-0.03	3e-05	0.61	<2.2e-16	0.43	<2.2e-16	0.58	<2.2e-16	0.58	<2.2e-16	0.58	<2.2e-16	0.41	<2.2e-16
ELK1	K562	TTS	protein coding	0.82	<2.2e-16	0.81	<2.2e-16	NA	NA	0.59	<2.2e-16	0.86	<2.2e-16	NA	NA	NA	NA	NA	NA	0.62	<2.2e-16	0.74	<2.2e-16	0.78	<2.2e-16	NA	NA	0.72	<2.2e-16	0.81	<2.2e-16	0.04	5e-08	0.64	<2.2e-16	-0.01	0.09	0.76	<2.2e-16	0.54	<2.2e-16	0.85	<2.2e-16	0.76	<2.2e-16	0.8	<2.2e-16	0.57	<2.2e-16
ETS1	K562	TTS	protein coding	0.5	<2.2e-16	0.63	<2.2e-16	NA	NA	0.55	<2.2e-16	0.51	<2.2e-16	NA	NA	NA	NA	NA	NA	0.62	<2.2e-16	0.36	<2.2e-16	0.75	<2.2e-16	NA	NA	0.35	<2.2e-16	0.47	<2.2e-16	0.01	0.08	0.75	<2.2e-16	-0.03	0.0002	0.81	<2.2e-16	0.49	<2.2e-16	0.74	<2.2e-16	0.74	<2.2e-16	0.73	<2.2e-16	0.53	<2.2e-16
EZH2	K562	TTS	protein coding	0.35	<2.2e-16	0.38	<2.2e-16	NA	NA	0.22	<2.2e-16	0.37	<2.2e-16	NA	NA	NA	NA	NA	NA	0.19	<2.2e-16	0.36	<2.2e-16	0.3	<2.2e-16	NA	NA	0.36	<2.2e-16	0.36	<2.2e-16	0.71	<2.2e-16	0.24	<2.2e-16	0.67	<2.2e-16	0.18	<2.2e-16	0.24	<2.2e-16	0.28	<2.2e-16	0.34	<2.2e-16	0.23	<2.2e-16	0.3	<2.2e-16
FOSL1	K562	TTS	protein coding	0.55	<2.2e-16	0.6	<2.2e-16	NA	NA	0.7	<2.2e-16	0.53	<2.2e-16	NA	NA	NA	NA	NA	NA	0.45	<2.2e-16	0.47	<2.2e-16	0.6	<2.2e-16	NA	NA	0.43	<2.2e-16	0.54	<2.2e-16	0.03	2e-05	0.61	<2.2e-16	0	0.9	0.56	<2.2e-16	0.49	<2.2e-16	0.65	<2.2e-16	0.55	<2.2e-16	0.55	<2.2e-16	0.5	<2.2e-16
GABP	K562	TTS	protein coding	0.3	<2.2e-16	0.42	<2.2e-16	NA	NA	0.35	<2.2e-16	0.26	<2.2e-16	NA	NA	NA	NA	NA	NA	0.4	<2.2e-16	0.21	<2.2e-16	0.41	<2.2e-16	NA	NA	0.19	<2.2e-16	0.26	<2.2e-16	-0.01	0.1	0.45	<2.2e-16	-0.03	2e-05	0.43	<2.2e-16	0.32	<2.2e-16	0.41	<2.2e-16	0.4	<2.2e-16	0.38	<2.2e-16	0.24	<2.2e-16
GATA1	K562	TTS	protein coding	0.88	<2.2e-16	0.81	<2.2e-16	NA	NA	0.63	<2.2e-16	0.84	<2.2e-16	NA	NA	NA	NA	NA	NA	0.55	<2.2e-16	0.78	<2.2e-16	0.75	<2.2e-16	NA	NA	0.74	<2.2e-16	0.82	<2.2e-16	0.04	5e-08	0.63	<2.2e-16	0	0.7	0.72	<2.2e-16	0.6	<2.2e-16	0.83	<2.2e-16	0.7	<2.2e-16	0.69	<2.2e-16	0.58	<2.2e-16
GTF2B	K562	TTS	protein coding	0.74	<2.2e-16	0.78	<2.2e-16	NA	NA	0.57	<2.2e-16	0.77	<2.2e-16	NA	NA	NA	NA	NA	NA	0.58	<2.2e-16	0.69	<2.2e-16	0.75	<2.2e-16	NA	NA	0.66	<2.2e-16	0.76	<2.2e-16	0.03	3e-05	0.66	<2.2e-16	-0.02	7	0.72	<2.2e-16	0.53	<2.2e-16	0.81	<2.2e-16	0.75	<2.2e-16	0.75	<2.2e-16	0.55	<2.2e-16
GTF2F1	K562	TTS	protein coding	0.77	<2.2e-16	0.81	<2.2e-16	NA	NA	0.58	<2.2e-16	0.84	<2.2e-16	NA	NA	NA	NA	NA	NA	0.62	<2.2e-16	0.7	<2.2e-16	0.79	<2.2e-16	NA	NA	0.7	<2.2e-16	0.79	<2.2e-16	0.04	2e-08	0.67	<2.2e-16	-0.02	0.03	0.78	<2.2e-16	0.53	<2.2e-16	0.87	<2.2e-16	0.79	<2.2e-16	0.83	<2.2e-16	0.59	<2.2e-16
GTF3C2	K562	TTS	protein coding	0.61	<2.2e-16	0.67	<2.2e-16	NA	NA	0.58	<2.2e-16	0.6	<2.2e-16	NA	NA	NA	NA	NA	NA	0.51	<2.2e-16	0.54	<2.2e-16	0.74	<2.2e-16	NA	NA	0.5	<2.2e-16	0.64	<2.2e-16	0.04	7e-08	0.7	<2.2e-16	0	0.6	0.72	<2.2e-16	0.51	<2.2e-16	0.74	<2.2e-16	0.68	<2.2e-16	0.67	<2.2e-16	0.6	<2.2e-16
H2AZ	K562	TTS	protein coding	0.53	<2.2e-16	0.58	<2.2e-16	NA	NA	0.46	<2.2e-16	0.46	<2.2e-16	NA	NA	NA	NA	NA	NA	0.35	<2.2e-16	0.41	<2.2e-16	0.62	<2.2e-16	NA	NA	0.38	<2.2e-16	0.47	<2.2e-16	0.13	<2.2e-16	0.67	<2.2e-16	0.1	<2.2e-16	0.51	<2.2e-16	0.43	<2.2e-16	0.53	<2.2e-16	0.55	<2.2e-16	0.48	<2.2e-16	0.52	<2.2e-16
H3K27AC	K562	TTS	protein coding	0.59	<2.2e-16	0.66	<2.2e-16	NA	NA	0.63	<2.2e-16	0.54	<2.2e-16	NA	NA	NA	NA	NA	NA	0.59	<2.2e-16	0.43	<2.2e-16	0.69	<2.2e-16	NA	NA	0.38	<2.2e-16	0.52	<2.2e-16	-0.02	0.03	0.77	<2.2e-16	-0.05	4e-12	0.7	<2.2e-16	0.62	<2.2e-16	0.7	<2.2e-16	0.81	<2.2e-16	0.66	<2.2e-16	0.54	<2.2e-16
H3K27ME3	K562	TTS	protein coding	-0.08	<2.2e-16	0.07	<2.2e-16	NA	NA	-0.07	<2.2e-16	0	0.9	NA	NA	NA	NA	NA	NA	-0.08	<2.2e-16	0	0.7	0.04	3e-08	NA	NA	0.05	5e-11	0.03	2e-05	0.6	<2.2e-16	-0.06	<2.2e-16	0.55	<2.2e-16	-0.08	<2.2e-16	-0.07	<2.2e-16	-0.02	0.02	0	0.7	-0.03	0.0005	-0.04	2e-07
H3K36ME3	K562	TTS	protein coding	0.47	<2.2e-16	0.33	<2.2e-16	NA	NA	0.29	<2.2e-16	0.51	<2.2e-16	NA	NA	NA	NA	NA	NA	0.37	<2.2e-16	0.51	<2.2e-16	0.29	<2.2e-16	NA	NA	0.46	<2.2e-16	0.5	<2.2e-16	-0.21	<2.2e-16	0.23	<2.2e-16	-0.21	<2.2e-16	0.35	<2.2e-16	0.3	<2.2e-16	0.46	<2.2e-16	0.39	<2.2e-16	0.4	<2.2e-16	0.3	<2.2e-16
H3K4ME1	K562	TTS	protein coding	0.62	<2.2e-16	0.61	<2.2e-16	NA	NA	0.55	<2.2e-16	0.56	<2.2e-16	NA	NA	NA	NA	NA	NA	0.4	<2.2e-16	0.52	<2.2e-16	0.65	<2.2e-16	NA	NA	0.5	<2.2e-16	0.61	<2.2e-16	0	0.6	0.63	<2.2e-16	-0.02	2	0.59	<2.2e-16	0.52	<2.2e-16	0.71	<2.2e-16	0.61	<2.2e-16	0.55	<2.2e-16	0.62	<2.2e-16
H3K4ME2	K562	TTS	protein coding	0.56	<2.2e-16	0.64	<2.2e-16	NA	NA	0.56	<2.2e-16	0.52	<2.2e-16	NA	NA	NA	NA	NA	NA	0.57	<2.2e-16	0.41	<2.2e-16	0.7	<2.2e-16	NA	NA	0.37	<2.2e-16	0.5	<2.2e-16	0.02	0.03	0.76	<2.2e-16	-0.02	9	0.72	<2.2e-16	0.56	<2.2e-16	0.69	<2.2e-16	0.84	<2.2e-16	0.67	<2.2e-16	0.55	<2.2e-16
H3K4ME3	K562	TTS	protein coding	0.58	<2.2e-16	0.63	<2.2e-16	NA	NA	0.55	<2.2e-16	0.53	<2.2e-16	NA	NA	NA	NA	NA	NA	0.58	<2.2e-16	0.42	<2.2e-16	0.67	<2.2e-16	NA	NA	0.38	<2.2e-16	0.5	<2.2e-16	0.02	0.02	0.74	<2.2e-16	-0.02	0.03	0.7	<2.2e-16	0.57	<2.2e-16	0.67	<2.2e-16	0.84	<2.2e-16	0.66	<2.2e-16	0.52	<2.2e-16
H3K79ME2	K562	TTS	protein coding	0.5	<2.2e-16	0.47	<2.2e-16	NA	NA	0.44	<2.2e-16	0.48	<2.2e-16	NA	NA	NA	NA	NA	NA	0.54	<2.2e-16	0.39	<2.2e-16	0.5	<2.2e-16	NA	NA	0.35	<2.2e-16	0.45	<2.2e-16	-0.04	2e-07	0.54	<2.2e-16	-0.06	<2.2e-16	0.56	<2.2e-16	0.48	<2.2e-16	0.56	<2.2e-16	0.76	<2.2e-16	0.55	<2.2e-16	0.4	<2.2e-16
H3K9AC	K562	TTS	protein coding	0.58	<2.2e-16	0.64	<2.2e-16	NA	NA	0.57	<2.2e-16	0.54	<2.2e-16	NA	NA	NA	NA	NA	NA	0.6	<2.2e-16	0.42	<2.2e-16	0.67	<2.2e-16	NA	NA	0.38	<2.2e-16	0.51	<2.2e-16	0	0.7	0.73	<2.2e-16	-0.04	2e-07	0.7	<2.2e-16	0.59	<2.2e-16	0.67	<2.2e-16	0.84	<2.2e-16	0.66	<2.2e-16	0.52	<2.2e-16
H3K9ME1	K562	TTS	protein coding	0.54	<2.2e-16	0.56	<2.2e-16	NA	NA	0.37	<2.2e-16	0.62	<2.2e-16	NA	NA	NA	NA	NA	NA	0.37	<2.2e-16	0.58	<2.2e-16	0.52	<2.2e-16	NA	NA	0.6	<2.2e-16	0.64	<2.2e-16	0.14	<2.2e-16	0.38	<2.2e-16	0.1	<2.2e-16	0.47	<2.2e-16	0.37	<2.2e-16	0.63	<2.2e-16	0.56	<2.2e-16	0.54	<2.2e-16	0.56	<2.2e-16
H3K9ME3	K562	TTS	protein coding	0.4	<2.2e-16	0.33	<2.2e-16	NA	NA	0.21	<2.2e-16	0.42	<2.2e-16	NA	NA	NA	NA	NA	NA	0.2	<2.2e-16	0.44	<2.2e-16	0.21	<2.2e-16	NA	NA	0.4	<2.2e-16	0.39	<2.2e-16	0.13	<2.2e-16	0.32	<2.2e-16	0.12	<2.2e-16	0.15	<2.2e-16	0.23	<2.2e-16	0.23	<2.2e-16	0.29	<2.2e-16	0.21	<2.2e-16	0.29	<2.2e-16
H4K20ME1	K562	TTS	protein coding	0.38	<2.2e-16	0.43	<2.2e-16	NA	NA	0.3	<2.2e-16	0.48	<2.2e-16	NA	NA	NA	NA	NA	NA	0.42	<2.2e-16	0.38	<2.2e-16	0.44	<2.2e-16	NA	NA	0.41	<2.2e-16	0.47	<2.2e-16	0.22	<2.2e-16	0.3	<2.2e-16	0.17	<2.2e-16	0.46	<2.2e-16	0.34	<2.2e-16	0.56	<2.2e-16	0.56	<2.2e-16	0.53	<2.2e-16	0.45	<2.2e-16
HCFC1	K562	TTS	protein coding	0.62	<2.2e-16	0.74	<2.2e-16	NA	NA	0.57	<2.2e-16	0.62	<2.2e-16	NA	NA	NA	NA	NA	NA	0.61	<2.2e-16	0.5	<2.2e-16	0.75	<2.2e-16	NA	NA	0.48	<2.2e-16	0.6	<2.2e-16	0	0.7	0.7	<2.2e-16	-0.04	1e-07	0.75	<2.2e-16	0.52	<2.2e-16	0.75	<2.2e-16	0.71	<2.2e-16	0.75	<2.2e-16	0.51	<2.2e-16
HDAC1	K562	TTS	protein coding	0.56	<2.2e-16	0.7	<2.2e-16	NA	NA	0.55	<2.2e-16	0.59	<2.2e-16	NA	NA	NA	NA	NA	NA	0.55	<2.2e-16	0.45	<2.2e-16	0.8	<2.2e-16	NA	NA	0.45	<2.2e-16	0.58	<2.2e-16	0.1	<2.2e-16	0.76	<2.2e-16	0.05	6e-12	0.8	<2.2e-16	0.53	<2.2e-16	0.78	<2.2e-16	0.85	<2.2e-16	0.75	<2.2e-16	0.71	<2.2e-16
HDAC2	K562	TTS	protein coding	0.47	<2.2e-16	0.61	<2.2e-16	NA	NA	0.48	<2.2e-16	0.54	<2.2e-16	NA	NA	NA	NA	NA	NA	0.45	<2.2e-16	0.38	<2.2e-16	0.74	<2.2e-16	NA	NA	0.41	<2.2e-16	0.53	<2.2e-16	0.12	<2.2e-16	0.68	<2.2e-16	0.07	<2.2e-16	0.73	<2.2e-16	0.45	<2.2e-16	0.76	<2.2e-16	0.75	<2.2e-16	0.7	<2.2e-16	0.73	<2.2e-16
HDAC6	K562	TTS	protein coding	0.44	<2.2e-16	0.56	<2.2e-16	NA	NA	0.4	<2.2e-16	0.55	<2.2e-16	NA	NA	NA	NA	NA	NA	0.47	<2.2e-16	0.41	<2.2e-16	0.62	<2.2e-16	NA	NA	0.45	<2.2e-16	0.54	<2.2e-16	0.14	<2.2e-16	0.53	<2.2e-16	0.09	<2.2e-16	0.65	<2.2e-16	0.41	<2.2e-16	0.7	<2.2e-16	0.71	<2.2e-16	0.7	<2.2e-16	0.65	<2.2e-16
HMGN3	K562	TTS	protein coding	0.52	<2.2e-16	0.63	<2.2e-16	NA	NA	0.5	<2.2e-16	0.58	<2.2e-16	NA	NA	NA	NA	NA	NA	0.55	<2.2e-16	0.38	<2.2e-16	0.79	<2.2e-16	NA	NA	0.41	<2.2e-16	0.54	<2.2e-16	-0.02	9	0.66	<2.2e-16	-0.07	<2.2e-16	0.92	<2.2e-16	0.44	<2.2e-16	0.84	<2.2e-16	0.73	<2.2e-16	0.81	<2.2e-16	0.61	<2.2e-16
IRF1	K562	TTS	protein coding	0.82	<2.2e-16	0.73	<2.2e-16	NA	NA	0.53	<2.2e-16	0.81	<2.2e-16	NA	NA	NA	NA	NA	NA	0.47	<2.2e-16	0.78	<2.2e-16	0.6	<2.2e-16	NA	NA	0.74	<2.2e-16	0.78	<2.2e-16	0.02	0.02	0.48	<2.2e-16	-0.02	0.0008	0.53	<2.2e-16	0.48	<2.2e-16	0.68	<2.2e-16	0.57	<2.2e-16	0.59	<2.2e-16	0.4	<2.2e-16
JARID1B-PLU1	K562	TTS	protein coding	0.53	<2.2e-16	0.63	<2.2e-16	NA	NA	0.54	<2.2e-16	0.56	<2.2e-16	NA	NA	NA	NA	NA	NA	0.64	<2.2e-16	0.4	<2.2e-16	0.72	<2.2e-16	NA	NA	0.39	<2.2e-16	0.52	<2.2e-16	0.04	4e-10	0.73	<2.2e-16	0	0.9	0.81	<2.2e-16	0.56	<2.2e-16	0.77	<2.2e-16	0.88	<2.2e-16	0.78	<2.2e-16	0.62	<2.2e-16
JUN	K562	TTS	protein coding	0.81	<2.2e-16	0.85	<2.2e-16	NA	NA	0.75	<2.2e-16	0.79	<2.2e-16	NA	NA	NA	NA	NA	NA	0.57	<2.2e-16	0.69	<2.2e-16	0.83	<2.2e-16	NA	NA	0.66	<2.2e-16	0.77	<2.2e-16	0.03	2e-05	0.75	<2.2e-16	-0.01	0.06	0.78	<2.2e-16	0.61	<2.2e-16	0.85	<2.2e-16	0.75	<2.2e-16	0.75	<2.2e-16	0.63	<2.2e-16
KAP1	K562	TTS	protein coding	0.73	<2.2e-16	0.54	<2.2e-16	NA	NA	0.4	<2.2e-16	0.72	<2.2e-16	NA	NA	NA	NA	NA	NA	0.4	<2.2e-16	0.67	<2.2e-16	0.41	<2.2e-16	NA	NA	0.62	<2.2e-16	0.61	<2.2e-16	-0.02	3	0.43	<2.2e-16	-0.04	6e-09	0.39	<2.2e-16	0.38	<2.2e-16	0.48	<2.2e-16	0.42	<2.2e-16	0.43	<2.2e-16	0.31	<2.2e-16
KAT2B-PCAF	K562	TTS	protein coding	0.56	<2.2e-16	0.6	<2.2e-16	NA	NA	0.43	<2.2e-16	0.6	<2.2e-16	NA	NA	NA	NA	NA	NA	0.43	<2.2e-16	0.52	<2.2e-16	0.56	<2.2e-16	NA	NA	0.52	<2.2e-16	0.58	<2.2e-16	0.19	<2.2e-16	0.52	<2.2e-16	0.15	<2.2e-16	0.54	<2.2e-16	0.44	<2.2e-16	0.59	<2.2e-16	0.66	<2.2e-16	0.55	<2.2e-16	0.65	<2.2e-16
KDM1A-LSD1	K562	TTS	protein coding	0.61	<2.2e-16	0.63	<2.2e-16	NA	NA	0.54	<2.2e-16	0.57	<2.2e-16	NA	NA	NA	NA	NA	NA	0.43	<2.2e-16	0.51	<2.2e-16	0.65	<2.2e-16	NA	NA	0.49	<2.2e-16	0.59	<2.2e-16	0.14	<2.2e-16	0.65	<2.2e-16	0.1	<2.2e-16	0.61	<2.2e-16	0.55	<2.2e-16	0.69	<2.2e-16	0.68	<2.2e-16	0.56	<2.2e-16	0.73	<2.2e-16
MAFF	K562	TTS	protein coding	0.8	<2.2e-16	0.7	<2.2e-16	NA	NA	0.54	<2.2e-16	0.84	<2.2e-16	NA	NA	NA	NA	NA	NA	0.51	<2.2e-16	0.76	<2.2e-16	0.59	<2.2e-16	NA	NA	0.7	<2.2e-16	0.75	<2.2e-16	0.04	7e-07	0.48	<2.2e-16	0	0.6	0.53	<2.2e-16	0.51	<2.2e-16	0.67	<2.2e-16	0.59	<2.2e-16	0.61	<2.2e-16	0.44	<2.2e-16
MAFK	K562	TTS	protein coding	0.83	<2.2e-16	0.78	<2.2e-16	NA	NA	0.6	<2.2e-16	0.86	<2.2e-16	NA	NA	NA	NA	NA	NA	0.52	<2.2e-16	0.76	<2.2e-16	0.71	<2.2e-16	NA	NA	0.72	<2.2e-16	0.79	<2.2e-16	0.05	2e-10	0.59	<2.2e-16	0	0.8	0.65	<2.2e-16	0.54	<2.2e-16	0.77	<2.2e-16	0.67	<2.2e-16	0.68	<2.2e-16	0.54	<2.2e-16
MAX	K562	TTS	protein coding	0.6	<2.2e-16	0.71	<2.2e-16	NA	NA	0.6	<2.2e-16	0.59	<2.2e-16	NA	NA	NA	NA	NA	NA	0.58	<2.2e-16	0.45	<2.2e-16	0.86	<2.2e-16	NA	NA	0.43	<2.2e-16	0.57	<2.2e-16	0.01	0.3	0.79	<2.2e-16	-0.03	2e-06	0.83	<2.2e-16	0.53	<2.2e-16	0.77	<2.2e-16	0.75	<2.2e-16	0.74	<2.2e-16	0.58	<2.2e-16
MAZ	K562	TTS	protein coding	0.62	<2.2e-16	0.72	<2.2e-16	NA	NA	0.6	<2.2e-16	0.63	<2.2e-16	NA	NA	NA	NA	NA	NA	0.57	<2.2e-16	0.47	<2.2e-16	0.84	<2.2e-16	NA	NA	0.47	<2.2e-16	0.6	<2.2e-16	0	0.6	0.76	<2.2e-16	-0.04	4e-10	0.87	<2.2e-16	0.51	<2.2e-16	0.84	<2.2e-16	0.76	<2.2e-16	0.79	<2.2e-16	0.64	<2.2e-16
MEF2A	K562	TTS	protein coding	0.69	<2.2e-16	0.62	<2.2e-16	NA	NA	0.58	<2.2e-16	0.64	<2.2e-16	NA	NA	NA	NA	NA	NA	0.57	<2.2e-16	0.59	<2.2e-16	0.56	<2.2e-16	NA	NA	0.54	<2.2e-16	0.61	<2.2e-16	0.01	0.07	0.56	<2.2e-16	-0.01	0.3	0.55	<2.2e-16	0.58	<2.2e-16	0.65	<2.2e-16	0.58	<2.2e-16	0.57	<2.2e-16	0.45	<2.2e-16
MXI1	K562	TTS	protein coding	0.8	<2.2e-16	0.78	<2.2e-16	NA	NA	0.61	<2.2e-16	0.82	<2.2e-16	NA	NA	NA	NA	NA	NA	0.67	<2.2e-16	0.68	<2.2e-16	0.78	<2.2e-16	NA	NA	0.65	<2.2e-16	0.74	<2.2e-16	0	0.7	0.68	<2.2e-16	-0.04	8e-08	0.78	<2.2e-16	0.58	<2.2e-16	0.83	<2.2e-16	0.77	<2.2e-16	0.8	<2.2e-16	0.54	<2.2e-16
MYC	K562	TTS	protein coding	0.68	<2.2e-16	0.73	<2.2e-16	NA	NA	0.61	<2.2e-16	0.66	<2.2e-16	NA	NA	NA	NA	NA	NA	0.63	<2.2e-16	0.54	<2.2e-16	0.81	<2.2e-16	NA	NA	0.51	<2.2e-16	0.64	<2.2e-16	0.03	2e-06	0.8	<2.2e-16	-0.01	0.3	0.81	<2.2e-16	0.59	<2.2e-16	0.79	<2.2e-16	0.81	<2.2e-16	0.75	<2.2e-16	0.62	<2.2e-16
NCOR1	K562	TTS	protein coding	0.5	<2.2e-16	0.51	<2.2e-16	NA	NA	0.42	<2.2e-16	0.49	<2.2e-16	NA	NA	NA	NA	NA	NA	0.4	<2.2e-16	0.42	<2.2e-16	0.52	<2.2e-16	NA	NA	0.41	<2.2e-16	0.47	<2.2e-16	0.19	<2.2e-16	0.54	<2.2e-16	0.17	<2.2e-16	0.51	<2.2e-16	0.44	<2.2e-16	0.53	<2.2e-16	0.63	<2.2e-16	0.48	<2.2e-16	0.66	<2.2e-16
NFE2	K562	TTS	protein coding	0.57	<2.2e-16	0.67	<2.2e-16	NA	NA	0.48	<2.2e-16	0.68	<2.2e-16	NA	NA	NA	NA	NA	NA	0.44	<2.2e-16	0.56	<2.2e-16	0.71	<2.2e-16	NA	NA	0.58	<2.2e-16	0.67	<2.2e-16	0.06	7e-16	0.54	<2.2e-16	0	0.8	0.65	<2.2e-16	0.42	<2.2e-16	0.75	<2.2e-16	0.62	<2.2e-16	0.69	<2.2e-16	0.54	<2.2e-16
NFYA	K562	TTS	protein coding	0.71	<2.2e-16	0.76	<2.2e-16	NA	NA	0.55	<2.2e-16	0.71	<2.2e-16	NA	NA	NA	NA	NA	NA	0.5	<2.2e-16	0.63	<2.2e-16	0.7	<2.2e-16	NA	NA	0.6	<2.2e-16	0.69	<2.2e-16	0.02	5	0.61	<2.2e-16	-0.02	0.0009	0.66	<2.2e-16	0.51	<2.2e-16	0.75	<2.2e-16	0.66	<2.2e-16	0.73	<2.2e-16	0.5	<2.2e-16
NFYB	K562	TTS	protein coding	0.36	<2.2e-16	0.49	<2.2e-16	NA	NA	0.35	<2.2e-16	0.36	<2.2e-16	NA	NA	NA	NA	NA	NA	0.31	<2.2e-16	0.29	<2.2e-16	0.47	<2.2e-16	NA	NA	0.27	<2.2e-16	0.35	<2.2e-16	0.01	0.5	0.46	<2.2e-16	-0.02	1	0.45	<2.2e-16	0.33	<2.2e-16	0.47	<2.2e-16	0.45	<2.2e-16	0.53	<2.2e-16	0.32	<2.2e-16
NR2F2	K562	TTS	protein coding	0.65	<2.2e-16	0.69	<2.2e-16	NA	NA	0.68	<2.2e-16	0.59	<2.2e-16	NA	NA	NA	NA	NA	NA	0.61	<2.2e-16	0.49	<2.2e-16	0.72	<2.2e-16	NA	NA	0.45	<2.2e-16	0.58	<2.2e-16	0.02	3	0.85	<2.2e-16	-0.01	0.2	0.72	<2.2e-16	0.7	<2.2e-16	0.79	<2.2e-16	0.74	<2.2e-16	0.68	<2.2e-16	0.63	<2.2e-16
NRF1	K562	TTS	protein coding	0.77	<2.2e-16	0.68	<2.2e-16	NA	NA	0.47	<2.2e-16	0.78	<2.2e-16	NA	NA	NA	NA	NA	NA	0.44	<2.2e-16	0.75	<2.2e-16	0.54	<2.2e-16	NA	NA	0.7	<2.2e-16	0.73	<2.2e-16	0.05	8e-11	0.43	<2.2e-16	0.01	0.09	0.48	<2.2e-16	0.43	<2.2e-16	0.58	<2.2e-16	0.52	<2.2e-16	0.53	<2.2e-16	0.35	<2.2e-16
P300	K562	TTS	protein coding	0.84	<2.2e-16	0.67	<2.2e-16	NA	NA	0.48	<2.2e-16	0.83	<2.2e-16	NA	NA	NA	NA	NA	NA	0.45	<2.2e-16	0.77	<2.2e-16	0.53	<2.2e-16	NA	NA	0.73	<2.2e-16	0.73	<2.2e-16	0.04	4e-07	0.42	<2.2e-16	0	0.6	0.48	<2.2e-16	0.45	<2.2e-16	0.61	<2.2e-16	0.51	<2.2e-16	0.52	<2.2e-16	0.37	<2.2e-16
PHF8	K562	TTS	protein coding	0.43	<2.2e-16	0.57	<2.2e-16	NA	NA	0.45	<2.2e-16	0.41	<2.2e-16	NA	NA	NA	NA	NA	NA	0.51	<2.2e-16	0.3	<2.2e-16	0.62	<2.2e-16	NA	NA	0.27	<2.2e-16	0.4	<2.2e-16	0.02	5	0.68	<2.2e-16	-0.02	0.02	0.68	<2.2e-16	0.45	<2.2e-16	0.58	<2.2e-16	0.72	<2.2e-16	0.61	<2.2e-16	0.47	<2.2e-16
PML	K562	TTS	protein coding	0.57	<2.2e-16	0.56	<2.2e-16	NA	NA	0.56	<2.2e-16	0.55	<2.2e-16	NA	NA	NA	NA	NA	NA	0.77	<2.2e-16	0.44	<2.2e-16	0.55	<2.2e-16	NA	NA	0.39	<2.2e-16	0.51	<2.2e-16	-0.02	3	0.58	<2.2e-16	-0.04	2e-08	0.66	<2.2e-16	0.65	<2.2e-16	0.72	<2.2e-16	0.65	<2.2e-16	0.7	<2.2e-16	0.42	<2.2e-16
POL2	K562	TTS	protein coding	0.51	<2.2e-16	0.54	<2.2e-16	NA	NA	0.49	<2.2e-16	0.54	<2.2e-16	NA	NA	NA	NA	NA	NA	0.76	<2.2e-16	0.38	<2.2e-16	0.57	<2.2e-16	NA	NA	0.36	<2.2e-16	0.48	<2.2e-16	-0.07	<2.2e-16	0.58	<2.2e-16	-0.1	<2.2e-16	0.74	<2.2e-16	0.52	<2.2e-16	0.76	<2.2e-16	0.7	<2.2e-16	0.78	<2.2e-16	0.45	<2.2e-16
POL3	K562	TTS	protein coding	0.48	<2.2e-16	0.5	<2.2e-16	NA	NA	0.34	<2.2e-16	0.51	<2.2e-16	NA	NA	NA	NA	NA	NA	0.28	<2.2e-16	0.57	<2.2e-16	0.4	<2.2e-16	NA	NA	0.53	<2.2e-16	0.59	<2.2e-16	0.04	4e-08	0.31	<2.2e-16	0.01	0.3	0.32	<2.2e-16	0.31	<2.2e-16	0.46	<2.2e-16	0.38	<2.2e-16	0.38	<2.2e-16	0.29	<2.2e-16
RAD21	K562	TTS	protein coding	0.57	<2.2e-16	0.54	<2.2e-16	NA	NA	0.44	<2.2e-16	0.57	<2.2e-16	NA	NA	NA	NA	NA	NA	0.35	<2.2e-16	0.54	<2.2e-16	0.51	<2.2e-16	NA	NA	0.51	<2.2e-16	0.59	<2.2e-16	0.06	4e-15	0.44	<2.2e-16	0.01	0.05	0.41	<2.2e-16	0.39	<2.2e-16	0.53	<2.2e-16	0.42	<2.2e-16	0.47	<2.2e-16	0.38	<2.2e-16
RBBP5	K562	TTS	protein coding	0.58	<2.2e-16	0.69	<2.2e-16	NA	NA	0.55	<2.2e-16	0.58	<2.2e-16	NA	NA	NA	NA	NA	NA	0.58	<2.2e-16	0.45	<2.2e-16	0.76	<2.2e-16	NA	NA	0.44	<2.2e-16	0.57	<2.2e-16	0.08	<2.2e-16	0.76	<2.2e-16	0.04	8e-07	0.79	<2.2e-16	0.55	<2.2e-16	0.76	<2.2e-16	0.87	<2.2e-16	0.73	<2.2e-16	0.67	<2.2e-16
RDBP-NELF-E	K562	TTS	protein coding	0.64	<2.2e-16	0.69	<2.2e-16	NA	NA	0.45	<2.2e-16	0.73	<2.2e-16	NA	NA	NA	NA	NA	NA	0.48	<2.2e-16	0.67	<2.2e-16	0.64	<2.2e-16	NA	NA	0.66	<2.2e-16	0.74	<2.2e-16	0.05	4e-13	0.5	<2.2e-16	0	0.8	0.63	<2.2e-16	0.41	<2.2e-16	0.72	<2.2e-16	0.64	<2.2e-16	0.68	<2.2e-16	0.49	<2.2e-16
REST	K562	TTS	protein coding	0.43	<2.2e-16	0.49	<2.2e-16	NA	NA	0.48	<2.2e-16	0.4	<2.2e-16	NA	NA	NA	NA	NA	NA	0.45	<2.2e-16	0.31	<2.2e-16	0.54	<2.2e-16	NA	NA	0.29	<2.2e-16	0.38	<2.2e-16	0.03	7e-06	0.58	<2.2e-16	0	0.8	0.55	<2.2e-16	0.44	<2.2e-16	0.56	<2.2e-16	0.53	<2.2e-16	0.49	<2.2e-16	0.4	<2.2e-16
RFX5	K562	TTS	protein coding	0.84	<2.2e-16	0.73	<2.2e-16	NA	NA	0.52	<2.2e-16	0.86	<2.2e-16	NA	NA	NA	NA	NA	NA	0.52	<2.2e-16	0.77	<2.2e-16	0.61	<2.2e-16	NA	NA	0.74	<2.2e-16	0.76	<2.2e-16	0.04	3e-08	0.49	<2.2e-16	0	0.7	0.57	<2.2e-16	0.48	<2.2e-16	0.68	<2.2e-16	0.59	<2.2e-16	0.63	<2.2e-16	0.43	<2.2e-16
RNF2	K562	TTS	protein coding	0.23	<2.2e-16	0.28	<2.2e-16	NA	NA	0.2	<2.2e-16	0.23	<2.2e-16	NA	NA	NA	NA	NA	NA	0.19	<2.2e-16	0.19	<2.2e-16	0.32	<2.2e-16	NA	NA	0.19	<2.2e-16	0.22	<2.2e-16	0.78	<2.2e-16	0.33	<2.2e-16	0.76	<2.2e-16	0.26	<2.2e-16	0.24	<2.2e-16	0.26	<2.2e-16	0.39	<2.2e-16	0.24	<2.2e-16	0.41	<2.2e-16
RPC155	K562	TTS	protein coding	0.77	<2.2e-16	0.7	<2.2e-16	NA	NA	0.51	<2.2e-16	0.76	<2.2e-16	NA	NA	NA	NA	NA	NA	0.44	<2.2e-16	0.77	<2.2e-16	0.61	<2.2e-16	NA	NA	0.72	<2.2e-16	0.78	<2.2e-16	0.05	2e-11	0.51	<2.2e-16	0.01	0.04	0.55	<2.2e-16	0.46	<2.2e-16	0.66	<2.2e-16	0.57	<2.2e-16	0.57	<2.2e-16	0.48	<2.2e-16
SAP30	K562	TTS	protein coding	0.59	<2.2e-16	0.7	<2.2e-16	NA	NA	0.53	<2.2e-16	0.61	<2.2e-16	NA	NA	NA	NA	NA	NA	0.56	<2.2e-16	0.49	<2.2e-16	0.74	<2.2e-16	NA	NA	0.47	<2.2e-16	0.58	<2.2e-16	0.1	<2.2e-16	0.72	<2.2e-16	0.05	2e-12	0.74	<2.2e-16	0.53	<2.2e-16	0.72	<2.2e-16	0.84	<2.2e-16	0.71	<2.2e-16	0.63	<2.2e-16
SETDB1	K562	TTS	protein coding	0.42	<2.2e-16	0.59	<2.2e-16	NA	NA	0.4	<2.2e-16	0.53	<2.2e-16	NA	NA	NA	NA	NA	NA	0.4	<2.2e-16	0.41	<2.2e-16	0.63	<2.2e-16	NA	NA	0.45	<2.2e-16	0.54	<2.2e-16	0.14	<2.2e-16	0.54	<2.2e-16	0.09	<2.2e-16	0.62	<2.2e-16	0.39	<2.2e-16	0.67	<2.2e-16	0.68	<2.2e-16	0.64	<2.2e-16	0.66	<2.2e-16
SIN3AK20	K562	TTS	protein coding	0.54	<2.2e-16	0.61	<2.2e-16	NA	NA	0.54	<2.2e-16	0.55	<2.2e-16	NA	NA	NA	NA	NA	NA	0.7	<2.2e-16	0.4	<2.2e-16	0.69	<2.2e-16	NA	NA	0.37	<2.2e-16	0.5	<2.2e-16	-0.01	0.1	0.68	<2.2e-16	-0.04	2e-09	0.77	<2.2e-16	0.53	<2.2e-16	0.73	<2.2e-16	0.75	<2.2e-16	0.75	<2.2e-16	0.47	<2.2e-16
SIRT6	K562	TTS	protein coding	0.86	<2.2e-16	0.73	<2.2e-16	NA	NA	0.58	<2.2e-16	0.79	<2.2e-16	NA	NA	NA	NA	NA	NA	0.51	<2.2e-16	0.83	<2.2e-16	0.63	<2.2e-16	NA	NA	0.74	<2.2e-16	0.82	<2.2e-16	0.05	8e-11	0.55	<2.2e-16	0.02	4	0.55	<2.2e-16	0.57	<2.2e-16	0.68	<2.2e-16	0.61	<2.2e-16	0.56	<2.2e-16	0.48	<2.2e-16
SIX5	K562	TTS	protein coding	0.31	<2.2e-16	0.42	<2.2e-16	NA	NA	0.34	<2.2e-16	0.29	<2.2e-16	NA	NA	NA	NA	NA	NA	0.4	<2.2e-16	0.23	<2.2e-16	0.42	<2.2e-16	NA	NA	0.2	<2.2e-16	0.28	<2.2e-16	-0.01	0.2	0.43	<2.2e-16	-0.03	0.0002	0.39	<2.2e-16	0.31	<2.2e-16	0.38	<2.2e-16	0.39	<2.2e-16	0.41	<2.2e-16	0.24	<2.2e-16
SMARCA4-BRG1	K562	TTS	protein coding	0.81	<2.2e-16	0.66	<2.2e-16	NA	NA	0.59	<2.2e-16	0.79	<2.2e-16	NA	NA	NA	NA	NA	NA	0.7	<2.2e-16	0.67	<2.2e-16	0.64	<2.2e-16	NA	NA	0.62	<2.2e-16	0.71	<2.2e-16	-0.06	2e-15	0.58	<2.2e-16	-0.08	<2.2e-16	0.72	<2.2e-16	0.6	<2.2e-16	0.81	<2.2e-16	0.71	<2.2e-16	0.76	<2.2e-16	0.53	<2.2e-16
SMARCB1-INI1	K562	TTS	protein coding	0.84	<2.2e-16	0.69	<2.2e-16	NA	NA	0.59	<2.2e-16	0.83	<2.2e-16	NA	NA	NA	NA	NA	NA	0.68	<2.2e-16	0.71	<2.2e-16	0.66	<2.2e-16	NA	NA	0.67	<2.2e-16	0.74	<2.2e-16	-0.03	3e-06	0.58	<2.2e-16	-0.06	<2.2e-16	0.71	<2.2e-16	0.59	<2.2e-16	0.81	<2.2e-16	0.72	<2.2e-16	0.75	<2.2e-16	0.54	<2.2e-16
SMC3	K562	TTS	protein coding	0.57	<2.2e-16	0.6	<2.2e-16	NA	NA	0.47	<2.2e-16	0.61	<2.2e-16	NA	NA	NA	NA	NA	NA	0.44	<2.2e-16	0.49	<2.2e-16	0.66	<2.2e-16	NA	NA	0.5	<2.2e-16	0.59	<2.2e-16	0.04	7e-08	0.56	<2.2e-16	-0.01	0.09	0.61	<2.2e-16	0.42	<2.2e-16	0.69	<2.2e-16	0.56	<2.2e-16	0.64	<2.2e-16	0.5	<2.2e-16
SP1	K562	TTS	protein coding	0.49	<2.2e-16	0.59	<2.2e-16	NA	NA	0.53	<2.2e-16	0.43	<2.2e-16	NA	NA	NA	NA	NA	NA	0.51	<2.2e-16	0.33	<2.2e-16	0.6	<2.2e-16	NA	NA	0.31	<2.2e-16	0.4	<2.2e-16	0.01	0.09	0.66	<2.2e-16	-0.02	0.03	0.62	<2.2e-16	0.49	<2.2e-16	0.59	<2.2e-16	0.58	<2.2e-16	0.62	<2.2e-16	0.42	<2.2e-16
SP2	K562	TTS	protein coding	0.46	<2.2e-16	0.57	<2.2e-16	NA	NA	0.4	<2.2e-16	0.48	<2.2e-16	NA	NA	NA	NA	NA	NA	0.39	<2.2e-16	0.42	<2.2e-16	0.54	<2.2e-16	NA	NA	0.41	<2.2e-16	0.49	<2.2e-16	0.07	<2.2e-16	0.5	<2.2e-16	0.03	2e-06	0.51	<2.2e-16	0.39	<2.2e-16	0.56	<2.2e-16	0.54	<2.2e-16	0.59	<2.2e-16	0.43	<2.2e-16
SPI1-PU1	K562	TTS	protein coding	0.2	<2.2e-16	0.27	<2.2e-16	NA	NA	0.28	<2.2e-16	0.16	<2.2e-16	NA	NA	NA	NA	NA	NA	0.26	<2.2e-16	0.13	<2.2e-16	0.29	<2.2e-16	NA	NA	0.1	<2.2e-16	0.17	<2.2e-16	0.11	<2.2e-16	0.43	<2.2e-16	0.11	<2.2e-16	0.26	<2.2e-16	0.36	<2.2e-16	0.27	<2.2e-16	0.37	<2.2e-16	0.25	<2.2e-16	0.38	<2.2e-16
SRF	K562	TTS	protein coding	0.61	<2.2e-16	0.71	<2.2e-16	NA	NA	0.58	<2.2e-16	0.6	<2.2e-16	NA	NA	NA	NA	NA	NA	0.59	<2.2e-16	0.51	<2.2e-16	0.64	<2.2e-16	NA	NA	0.48	<2.2e-16	0.58	<2.2e-16	0.02	0.02	0.65	<2.2e-16	-0.02	0.03	0.63	<2.2e-16	0.54	<2.2e-16	0.7	<2.2e-16	0.64	<2.2e-16	0.64	<2.2e-16	0.47	<2.2e-16
STAT1	K562	TTS	protein coding	0.8	<2.2e-16	0.8	<2.2e-16	NA	NA	0.61	<2.2e-16	0.79	<2.2e-16	NA	NA	NA	NA	NA	NA	0.56	<2.2e-16	0.75	<2.2e-16	0.75	<2.2e-16	NA	NA	0.7	<2.2e-16	0.82	<2.2e-16	0.03	2e-06	0.66	<2.2e-16	-0.01	0.05	0.7	<2.2e-16	0.58	<2.2e-16	0.82	<2.2e-16	0.71	<2.2e-16	0.72	<2.2e-16	0.57	<2.2e-16
STAT2	K562	TTS	protein coding	0.71	<2.2e-16	0.78	<2.2e-16	NA	NA	0.63	<2.2e-16	0.73	<2.2e-16	NA	NA	NA	NA	NA	NA	0.58	<2.2e-16	0.63	<2.2e-16	0.81	<2.2e-16	NA	NA	0.61	<2.2e-16	0.75	<2.2e-16	0.02	3	0.72	<2.2e-16	-0.03	1e-05	0.78	<2.2e-16	0.58	<2.2e-16	0.87	<2.2e-16	0.76	<2.2e-16	0.78	<2.2e-16	0.61	<2.2e-16
STAT5A	K562	TTS	protein coding	0.61	<2.2e-16	0.58	<2.2e-16	NA	NA	0.57	<2.2e-16	0.52	<2.2e-16	NA	NA	NA	NA	NA	NA	0.52	<2.2e-16	0.48	<2.2e-16	0.51	<2.2e-16	NA	NA	0.42	<2.2e-16	0.5	<2.2e-16	0.08	<2.2e-16	0.65	<2.2e-16	0.06	<2.2e-16	0.51	<2.2e-16	0.66	<2.2e-16	0.63	<2.2e-16	0.58	<2.2e-16	0.49	<2.2e-16	0.5	<2.2e-16
SUZ12	K562	TTS	protein coding	0.11	<2.2e-16	0.21	<2.2e-16	NA	NA	0.12	<2.2e-16	0.15	<2.2e-16	NA	NA	NA	NA	NA	NA	0.12	<2.2e-16	0.1	<2.2e-16	0.23	<2.2e-16	NA	NA	0.13	<2.2e-16	0.15	<2.2e-16	0.61	<2.2e-16	0.21	<2.2e-16	0.56	<2.2e-16	0.17	<2.2e-16	0.16	<2.2e-16	0.19	<2.2e-16	0.3	<2.2e-16	0.19	<2.2e-16	0.31	<2.2e-16
TAF1	K562	TTS	protein coding	0.51	<2.2e-16	0.61	<2.2e-16	NA	NA	0.54	<2.2e-16	0.49	<2.2e-16	NA	NA	NA	NA	NA	NA	0.64	<2.2e-16	0.37	<2.2e-16	0.63	<2.2e-16	NA	NA	0.34	<2.2e-16	0.46	<2.2e-16	-0.01	0.08	0.68	<2.2e-16	-0.05	2e-10	0.7	<2.2e-16	0.52	<2.2e-16	0.64	<2.2e-16	0.73	<2.2e-16	0.67	<2.2e-16	0.42	<2.2e-16
TAF7	K562	TTS	protein coding	0.58	<2.2e-16	0.58	<2.2e-16	NA	NA	0.56	<2.2e-16	0.58	<2.2e-16	NA	NA	NA	NA	NA	NA	0.73	<2.2e-16	0.47	<2.2e-16	0.58	<2.2e-16	NA	NA	0.43	<2.2e-16	0.54	<2.2e-16	0	0.8	0.61	<2.2e-16	-0.02	1	0.66	<2.2e-16	0.6	<2.2e-16	0.71	<2.2e-16	0.7	<2.2e-16	0.7	<2.2e-16	0.46	<2.2e-16
TAL1	K562	TTS	protein coding	0.7	<2.2e-16	0.64	<2.2e-16	NA	NA	0.58	<2.2e-16	0.66	<2.2e-16	NA	NA	NA	NA	NA	NA	0.61	<2.2e-16	0.55	<2.2e-16	0.64	<2.2e-16	NA	NA	0.52	<2.2e-16	0.61	<2.2e-16	-0.03	0.0003	0.61	<2.2e-16	-0.05	3e-13	0.7	<2.2e-16	0.62	<2.2e-16	0.82	<2.2e-16	0.64	<2.2e-16	0.69	<2.2e-16	0.5	<2.2e-16
TBL1XR1-TBLR1	K562	TTS	protein coding	0.77	<2.2e-16	0.81	<2.2e-16	NA	NA	0.61	<2.2e-16	0.83	<2.2e-16	NA	NA	NA	NA	NA	NA	0.64	<2.2e-16	0.69	<2.2e-16	0.83	<2.2e-16	NA	NA	0.68	<2.2e-16	0.79	<2.2e-16	0.03	5e-05	0.7	<2.2e-16	-0.03	0.0004	0.83	<2.2e-16	0.56	<2.2e-16	0.92	<2.2e-16	0.8	<2.2e-16	0.86	<2.2e-16	0.64	<2.2e-16
TBP	K562	TTS	protein coding	0.66	<2.2e-16	0.74	<2.2e-16	NA	NA	0.62	<2.2e-16	0.65	<2.2e-16	NA	NA	NA	NA	NA	NA	0.65	<2.2e-16	0.53	<2.2e-16	0.76	<2.2e-16	NA	NA	0.49	<2.2e-16	0.61	<2.2e-16	0.02	0.02	0.76	<2.2e-16	-0.03	0.0003	0.78	<2.2e-16	0.59	<2.2e-16	0.78	<2.2e-16	0.81	<2.2e-16	0.78	<2.2e-16	0.55	<2.2e-16
TEAD4	K562	TTS	protein coding	0.66	<2.2e-16	0.68	<2.2e-16	NA	NA	0.68	<2.2e-16	0.58	<2.2e-16	NA	NA	NA	NA	NA	NA	0.63	<2.2e-16	0.49	<2.2e-16	0.69	<2.2e-16	NA	NA	0.44	<2.2e-16	0.56	<2.2e-16	0.01	0.5	0.76	<2.2e-16	-0.02	0.01	0.73	<2.2e-16	0.69	<2.2e-16	0.79	<2.2e-16	0.7	<2.2e-16	0.66	<2.2e-16	0.54	<2.2e-16
THAP1	K562	TTS	protein coding	0.49	<2.2e-16	0.62	<2.2e-16	NA	NA	0.52	<2.2e-16	0.5	<2.2e-16	NA	NA	NA	NA	NA	NA	0.55	<2.2e-16	0.39	<2.2e-16	0.67	<2.2e-16	NA	NA	0.37	<2.2e-16	0.48	<2.2e-16	0.02	0.0009	0.65	<2.2e-16	-0.02	0.04	0.68	<2.2e-16	0.47	<2.2e-16	0.65	<2.2e-16	0.65	<2.2e-16	0.67	<2.2e-16	0.48	<2.2e-16
TR4-NR2C2	K562	TTS	protein coding	0.54	<2.2e-16	0.58	<2.2e-16	NA	NA	0.33	<2.2e-16	0.66	<2.2e-16	NA	NA	NA	NA	NA	NA	0.31	<2.2e-16	0.65	<2.2e-16	0.51	<2.2e-16	NA	NA	0.65	<2.2e-16	0.7	<2.2e-16	0.06	<2.2e-16	0.34	<2.2e-16	0.01	0.2	0.44	<2.2e-16	0.28	<2.2e-16	0.58	<2.2e-16	0.45	<2.2e-16	0.51	<2.2e-16	0.39	<2.2e-16
TRIM28	K562	TTS	protein coding	0.74	<2.2e-16	0.68	<2.2e-16	NA	NA	0.64	<2.2e-16	0.71	<2.2e-16	NA	NA	NA	NA	NA	NA	0.7	<2.2e-16	0.63	<2.2e-16	0.68	<2.2e-16	NA	NA	0.56	<2.2e-16	0.69	<2.2e-16	0	0.7	0.77	<2.2e-16	-0.02	0.02	0.73	<2.2e-16	0.71	<2.2e-16	0.82	<2.2e-16	0.77	<2.2e-16	0.75	<2.2e-16	0.63	<2.2e-16
UBTF	K562	TTS	protein coding	0.69	<2.2e-16	0.72	<2.2e-16	NA	NA	0.59	<2.2e-16	0.68	<2.2e-16	NA	NA	NA	NA	NA	NA	0.63	<2.2e-16	0.54	<2.2e-16	0.8	<2.2e-16	NA	NA	0.52	<2.2e-16	0.65	<2.2e-16	0.04	4e-10	0.73	<2.2e-16	0	0.9	0.86	<2.2e-16	0.55	<2.2e-16	0.82	<2.2e-16	0.83	<2.2e-16	0.77	<2.2e-16	0.62	<2.2e-16
USF1	K562	TTS	protein coding	0.41	<2.2e-16	0.48	<2.2e-16	NA	NA	0.43	<2.2e-16	0.4	<2.2e-16	NA	NA	NA	NA	NA	NA	0.4	<2.2e-16	0.33	<2.2e-16	0.64	<2.2e-16	NA	NA	0.3	<2.2e-16	0.39	<2.2e-16	0	0.7	0.51	<2.2e-16	-0.02	4	0.49	<2.2e-16	0.39	<2.2e-16	0.51	<2.2e-16	0.47	<2.2e-16	0.49	<2.2e-16	0.35	<2.2e-16
USF2	K562	TTS	protein coding	0.75	<2.2e-16	0.76	<2.2e-16	NA	NA	0.53	<2.2e-16	0.83	<2.2e-16	NA	NA	NA	NA	NA	NA	0.55	<2.2e-16	0.78	<2.2e-16	0.72	<2.2e-16	NA	NA	0.75	<2.2e-16	0.84	<2.2e-16	0.05	2e-13	0.56	<2.2e-16	0	0.6	0.64	<2.2e-16	0.49	<2.2e-16	0.78	<2.2e-16	0.68	<2.2e-16	0.73	<2.2e-16	0.52	<2.2e-16
WHSC1-NSD2	K562	TTS	protein coding	0.49	<2.2e-16	0.56	<2.2e-16	NA	NA	0.41	<2.2e-16	0.57	<2.2e-16	NA	NA	NA	NA	NA	NA	0.4	<2.2e-16	0.47	<2.2e-16	0.62	<2.2e-16	NA	NA	0.49	<2.2e-16	0.59	<2.2e-16	-0.06	2e-14	0.51	<2.2e-16	-0.09	<2.2e-16	0.64	<2.2e-16	0.4	<2.2e-16	0.73	<2.2e-16	0.66	<2.2e-16	0.65	<2.2e-16	0.66	<2.2e-16
XRCC4	K562	TTS	protein coding	0.68	<2.2e-16	0.69	<2.2e-16	NA	NA	0.47	<2.2e-16	0.76	<2.2e-16	NA	NA	NA	NA	NA	NA	0.47	<2.2e-16	0.74	<2.2e-16	0.62	<2.2e-16	NA	NA	0.71	<2.2e-16	0.79	<2.2e-16	0.06	<2.2e-16	0.5	<2.2e-16	0.02	0.02	0.56	<2.2e-16	0.44	<2.2e-16	0.71	<2.2e-16	0.6	<2.2e-16	0.64	<2.2e-16	0.49	<2.2e-16
YY1	K562	TTS	protein coding	0.45	<2.2e-16	0.56	<2.2e-16	NA	NA	0.5	<2.2e-16	0.43	<2.2e-16	NA	NA	NA	NA	NA	NA	0.54	<2.2e-16	0.32	<2.2e-16	0.6	<2.2e-16	NA	NA	0.28	<2.2e-16	0.4	<2.2e-16	-0.01	0.4	0.65	<2.2e-16	-0.04	2e-07	0.64	<2.2e-16	0.47	<2.2e-16	0.59	<2.2e-16	0.65	<2.2e-16	0.6	<2.2e-16	0.4	<2.2e-16
ZBTB33	K562	TTS	protein coding	0.19	<2.2e-16	0.2	<2.2e-16	NA	NA	0.26	<2.2e-16	0.18	<2.2e-16	NA	NA	NA	NA	NA	NA	0.41	<2.2e-16	0.12	<2.2e-16	0.25	<2.2e-16	NA	NA	0.09	<2.2e-16	0.17	<2.2e-16	0.08	<2.2e-16	0.39	<2.2e-16	0.08	<2.2e-16	0.31	<2.2e-16	0.37	<2.2e-16	0.31	<2.2e-16	0.42	<2.2e-16	0.43	<2.2e-16	0.32	<2.2e-16
ZBTB7A	K562	TTS	protein coding	0.39	<2.2e-16	0.49	<2.2e-16	NA	NA	0.44	<2.2e-16	0.4	<2.2e-16	NA	NA	NA	NA	NA	NA	0.43	<2.2e-16	0.24	<2.2e-16	0.67	<2.2e-16	NA	NA	0.25	<2.2e-16	0.37	<2.2e-16	0	0.5	0.65	<2.2e-16	-0.04	1e-08	0.75	<2.2e-16	0.35	<2.2e-16	0.65	<2.2e-16	0.6	<2.2e-16	0.62	<2.2e-16	0.56	<2.2e-16
ZC3H11A	K562	TTS	protein coding	0.86	<2.2e-16	0.82	<2.2e-16	NA	NA	0.61	<2.2e-16	0.88	<2.2e-16	NA	NA	NA	NA	NA	NA	0.59	<2.2e-16	0.79	<2.2e-16	0.78	<2.2e-16	NA	NA	0.76	<2.2e-16	0.85	<2.2e-16	0.04	7e-09	0.65	<2.2e-16	-0.01	0.4	0.75	<2.2e-16	0.54	<2.2e-16	0.85	<2.2e-16	0.73	<2.2e-16	0.76	<2.2e-16	0.59	<2.2e-16
ZMIZ1	K562	TTS	protein coding	0.81	<2.2e-16	0.8	<2.2e-16	NA	NA	0.65	<2.2e-16	0.83	<2.2e-16	NA	NA	NA	NA	NA	NA	0.69	<2.2e-16	0.7	<2.2e-16	0.81	<2.2e-16	NA	NA	0.67	<2.2e-16	0.79	<2.2e-16	-0.01	0.2	0.7	<2.2e-16	-0.05	5e-14	0.86	<2.2e-16	0.61	<2.2e-16	0.93	<2.2e-16	0.79	<2.2e-16	0.85	<2.2e-16	0.63	<2.2e-16
ZNF143	K562	TTS	protein coding	0.69	<2.2e-16	0.73	<2.2e-16	NA	NA	0.58	<2.2e-16	0.7	<2.2e-16	NA	NA	NA	NA	NA	NA	0.57	<2.2e-16	0.58	<2.2e-16	0.76	<2.2e-16	NA	NA	0.56	<2.2e-16	0.67	<2.2e-16	0.02	0.02	0.71	<2.2e-16	-0.03	2e-05	0.72	<2.2e-16	0.52	<2.2e-16	0.77	<2.2e-16	0.67	<2.2e-16	0.75	<2.2e-16	0.55	<2.2e-16
ZNF263	K562	TTS	protein coding	0.29	<2.2e-16	0.47	<2.2e-16	NA	NA	0.34	<2.2e-16	0.41	<2.2e-16	NA	NA	NA	NA	NA	NA	0.33	<2.2e-16	0.27	<2.2e-16	0.62	<2.2e-16	NA	NA	0.31	<2.2e-16	0.44	<2.2e-16	0.03	3e-05	0.48	<2.2e-16	-0.02	2	0.62	<2.2e-16	0.26	<2.2e-16	0.66	<2.2e-16	0.54	<2.2e-16	0.62	<2.2e-16	0.52	<2.2e-16
ZNF274	K562	TTS	protein coding	0.43	<2.2e-16	0.43	<2.2e-16	NA	NA	0.18	<2.2e-16	0.54	<2.2e-16	NA	NA	NA	NA	NA	NA	0.16	<2.2e-16	0.66	<2.2e-16	0.26	<2.2e-16	NA	NA	0.62	<2.2e-16	0.63	<2.2e-16	0.1	<2.2e-16	0.14	<2.2e-16	0.06	<2.2e-16	0.14	<2.2e-16	0.16	<2.2e-16	0.31	<2.2e-16	0.24	<2.2e-16	0.25	<2.2e-16	0.18	<2.2e-16
ZNF384	K562	TTS	protein coding	0.75	<2.2e-16	0.71	<2.2e-16	NA	NA	0.61	<2.2e-16	0.72	<2.2e-16	NA	NA	NA	NA	NA	NA	0.56	<2.2e-16	0.66	<2.2e-16	0.7	<2.2e-16	NA	NA	0.61	<2.2e-16	0.73	<2.2e-16	0.02	2	0.65	<2.2e-16	-0.01	0.04	0.69	<2.2e-16	0.57	<2.2e-16	0.77	<2.2e-16	0.68	<2.2e-16	0.68	<2.2e-16	0.56	<2.2e-16
DNASE HYPERSENSITIVITY	K562	TTS	protein coding	0.52	<2.2e-16	0.67	<2.2e-16	NA	NA	0.54	<2.2e-16	0.53	<2.2e-16	NA	NA	NA	NA	NA	NA	0.49	<2.2e-16	0.37	<2.2e-16	0.79	<2.2e-16	NA	NA	0.38	<2.2e-16	0.51	<2.2e-16	0.04	9e-07	0.74	<2.2e-16	-0.02	0.03	0.8	<2.2e-16	0.47	<2.2e-16	0.77	<2.2e-16	0.7	<2.2e-16	0.74	<2.2e-16	0.61	<2.2e-16
FOS (AND EGFP-FOS)	K562	TTS	protein coding	0.65	<2.2e-16	0.73	<2.2e-16	NA	NA	0.67	<2.2e-16	0.61	<2.2e-16	NA	NA	NA	NA	NA	NA	0.47	<2.2e-16	0.55	<2.2e-16	0.7	<2.2e-16	NA	NA	0.51	<2.2e-16	0.62	<2.2e-16	0.01	0.05	0.65	<2.2e-16	-0.02	4	0.64	<2.2e-16	0.54	<2.2e-16	0.7	<2.2e-16	0.64	<2.2e-16	0.68	<2.2e-16	0.51	<2.2e-16
JUND (AND EGFP-JUND)	K562	TTS	protein coding	0.74	<2.2e-16	0.82	<2.2e-16	NA	NA	0.82	<2.2e-16	0.68	<2.2e-16	NA	NA	NA	NA	NA	NA	0.55	<2.2e-16	0.59	<2.2e-16	0.8	<2.2e-16	NA	NA	0.55	<2.2e-16	0.67	<2.2e-16	0.02	0.03	0.75	<2.2e-16	-0.02	3	0.76	<2.2e-16	0.62	<2.2e-16	0.81	<2.2e-16	0.71	<2.2e-16	0.7	<2.2e-16	0.6	<2.2e-16
GATA2 (AND EGFP-GATA2)	K562	TTS	protein coding	0.39	<2.2e-16	0.35	<2.2e-16	NA	NA	0.43	<2.2e-16	0.26	<2.2e-16	NA	NA	NA	NA	NA	NA	0.34	<2.2e-16	0.25	<2.2e-16	0.33	<2.2e-16	NA	NA	0.2	<2.2e-16	0.27	<2.2e-16	0.09	<2.2e-16	0.5	<2.2e-16	0.1	<2.2e-16	0.34	<2.2e-16	0.55	<2.2e-16	0.44	<2.2e-16	0.4	<2.2e-16	0.28	<2.2e-16	0.41	<2.2e-16
ARID3A	K562	TSS	lincRNA	NA	NA	0.81	<2.2e-16	NA	NA	0.67	<2.2e-16	0.87	<2.2e-16	NA	NA	NA	NA	NA	NA	0.65	<2.2e-16	0.82	<2.2e-16	0.76	<2.2e-16	NA	NA	0.75	<2.2e-16	0.83	<2.2e-16	0.06	3e-06	0.68	<2.2e-16	0.02	0.06	0.76	<2.2e-16	0.62	<2.2e-16	0.86	<2.2e-16	0.71	<2.2e-16	0.74	<2.2e-16	0.53	<2.2e-16
ATF1	K562	TSS	lincRNA	0.81	<2.2e-16	NA	NA	NA	NA	0.68	<2.2e-16	0.79	<2.2e-16	NA	NA	NA	NA	NA	NA	0.6	<2.2e-16	0.74	<2.2e-16	0.75	<2.2e-16	NA	NA	0.69	<2.2e-16	0.77	<2.2e-16	0.08	6e-10	0.65	<2.2e-16	0.04	2	0.7	<2.2e-16	0.6	<2.2e-16	0.8	<2.2e-16	0.67	<2.2e-16	0.71	<2.2e-16	0.48	<2.2e-16
ATF3	K562	TSS	lincRNA	0.67	<2.2e-16	0.68	<2.2e-16	NA	NA	NA	NA	0.58	<2.2e-16	NA	NA	NA	NA	NA	NA	0.59	<2.2e-16	0.53	<2.2e-16	0.63	<2.2e-16	NA	NA	0.46	<2.2e-16	0.55	<2.2e-16	0.03	8	0.67	<2.2e-16	0.01	0.3	0.6	<2.2e-16	0.7	<2.2e-16	0.66	<2.2e-16	0.55	<2.2e-16	0.55	<2.2e-16	0.45	<2.2e-16
BACH1	K562	TSS	lincRNA	0.87	<2.2e-16	0.79	<2.2e-16	NA	NA	0.58	<2.2e-16	NA	NA	NA	NA	NA	NA	NA	NA	0.6	<2.2e-16	0.84	<2.2e-16	0.74	<2.2e-16	NA	NA	0.8	<2.2e-16	0.85	<2.2e-16	0.08	2e-11	0.6	<2.2e-16	0.04	5	0.72	<2.2e-16	0.49	<2.2e-16	0.82	<2.2e-16	0.66	<2.2e-16	0.74	<2.2e-16	0.48	<2.2e-16
BCLAF1	K562	TSS	lincRNA	0.65	<2.2e-16	0.6	<2.2e-16	NA	NA	0.59	<2.2e-16	0.6	<2.2e-16	NA	NA	NA	NA	NA	NA	NA	NA	0.48	<2.2e-16	0.64	<2.2e-16	NA	NA	0.43	<2.2e-16	0.53	<2.2e-16	0.04	4	0.72	<2.2e-16	0.02	0.2	0.69	<2.2e-16	0.61	<2.2e-16	0.69	<2.2e-16	0.7	<2.2e-16	0.65	<2.2e-16	0.47	<2.2e-16
BDP1	K562	TSS	lincRNA	0.82	<2.2e-16	0.74	<2.2e-16	NA	NA	0.53	<2.2e-16	0.84	<2.2e-16	NA	NA	NA	NA	NA	NA	0.48	<2.2e-16	NA	NA	0.66	<2.2e-16	NA	NA	0.84	<2.2e-16	0.9	<2.2e-16	0.09	5e-12	0.52	<2.2e-16	0.04	0.0003	0.6	<2.2e-16	0.45	<2.2e-16	0.74	<2.2e-16	0.56	<2.2e-16	0.64	<2.2e-16	0.44	<2.2e-16
BHLHE40	K562	TSS	lincRNA	0.76	<2.2e-16	0.75	<2.2e-16	NA	NA	0.63	<2.2e-16	0.74	<2.2e-16	NA	NA	NA	NA	NA	NA	0.64	<2.2e-16	0.66	<2.2e-16	NA	NA	NA	NA	0.61	<2.2e-16	0.72	<2.2e-16	0.08	4e-10	0.71	<2.2e-16	0.04	1	0.83	<2.2e-16	0.56	<2.2e-16	0.82	<2.2e-16	0.72	<2.2e-16	0.75	<2.2e-16	0.56	<2.2e-16
BRF1	K562	TSS	lincRNA	0.75	<2.2e-16	0.69	<2.2e-16	NA	NA	0.46	<2.2e-16	0.8	<2.2e-16	NA	NA	NA	NA	NA	NA	0.43	<2.2e-16	0.84	<2.2e-16	0.61	<2.2e-16	NA	NA	NA	NA	0.83	<2.2e-16	0.09	5e-14	0.45	<2.2e-16	0.05	6e-05	0.57	<2.2e-16	0.38	<2.2e-16	0.69	<2.2e-16	0.51	<2.2e-16	0.59	<2.2e-16	0.4	<2.2e-16
BRF2	K562	TSS	lincRNA	0.83	<2.2e-16	0.77	<2.2e-16	NA	NA	0.55	<2.2e-16	0.85	<2.2e-16	NA	NA	NA	NA	NA	NA	0.53	<2.2e-16	0.9	<2.2e-16	0.72	<2.2e-16	NA	NA	0.83	<2.2e-16	NA	NA	0.1	<2.2e-16	0.58	<2.2e-16	0.06	2e-06	0.68	<2.2e-16	0.48	<2.2e-16	0.8	<2.2e-16	0.62	<2.2e-16	0.69	<2.2e-16	0.49	<2.2e-16
CBX2	K562	TSS	lincRNA	0.06	3e-06	0.08	6e-10	NA	NA	0.03	8	0.08	2e-11	NA	NA	NA	NA	NA	NA	0.04	4	0.09	5e-12	0.08	4e-10	NA	NA	0.09	5e-14	0.1	<2.2e-16	NA	NA	0.06	4e-07	0.94	<2.2e-16	0.03	0.01	0.07	2e-08	0.06	8e-06	0.15	<2.2e-16	0.06	3e-07	0.25	<2.2e-16
CBX3	K562	TSS	lincRNA	0.68	<2.2e-16	0.65	<2.2e-16	NA	NA	0.67	<2.2e-16	0.6	<2.2e-16	NA	NA	NA	NA	NA	NA	0.72	<2.2e-16	0.52	<2.2e-16	0.71	<2.2e-16	NA	NA	0.45	<2.2e-16	0.58	<2.2e-16	0.06	4e-07	NA	NA	0.04	0.0006	0.7	<2.2e-16	0.73	<2.2e-16	0.73	<2.2e-16	0.76	<2.2e-16	0.67	<2.2e-16	0.67	<2.2e-16
CBX8	K562	TSS	lincRNA	0.02	0.06	0.04	2	NA	NA	0.01	0.3	0.04	5	NA	NA	NA	NA	NA	NA	0.02	0.2	0.04	0.0003	0.04	1	NA	NA	0.05	6e-05	0.06	2e-06	0.94	<2.2e-16	0.04	0.0006	NA	NA	0.01	0.6	0.05	0.0002	0.01	0.3	0.12	<2.2e-16	0.03	0.03	0.24	<2.2e-16
CCNT2	K562	TSS	lincRNA	0.76	<2.2e-16	0.7	<2.2e-16	NA	NA	0.6	<2.2e-16	0.72	<2.2e-16	NA	NA	NA	NA	NA	NA	0.69	<2.2e-16	0.6	<2.2e-16	0.83	<2.2e-16	NA	NA	0.57	<2.2e-16	0.68	<2.2e-16	0.03	0.01	0.7	<2.2e-16	0.01	0.6	NA	NA	0.54	<2.2e-16	0.87	<2.2e-16	0.78	<2.2e-16	0.76	<2.2e-16	0.56	<2.2e-16
CEBPB	K562	TSS	lincRNA	0.62	<2.2e-16	0.6	<2.2e-16	NA	NA	0.7	<2.2e-16	0.49	<2.2e-16	NA	NA	NA	NA	NA	NA	0.61	<2.2e-16	0.45	<2.2e-16	0.56	<2.2e-16	NA	NA	0.38	<2.2e-16	0.48	<2.2e-16	0.07	2e-08	0.73	<2.2e-16	0.05	0.0002	0.54	<2.2e-16	NA	NA	0.64	<2.2e-16	0.62	<2.2e-16	0.52	<2.2e-16	0.51	<2.2e-16
CEBPD	K562	TSS	lincRNA	0.86	<2.2e-16	0.8	<2.2e-16	NA	NA	0.66	<2.2e-16	0.82	<2.2e-16	NA	NA	NA	NA	NA	NA	0.69	<2.2e-16	0.74	<2.2e-16	0.82	<2.2e-16	NA	NA	0.69	<2.2e-16	0.8	<2.2e-16	0.06	8e-06	0.73	<2.2e-16	0.01	0.3	0.87	<2.2e-16	0.64	<2.2e-16	NA	NA	0.75	<2.2e-16	0.79	<2.2e-16	0.56	<2.2e-16
CHD1	K562	TSS	lincRNA	0.71	<2.2e-16	0.67	<2.2e-16	NA	NA	0.55	<2.2e-16	0.66	<2.2e-16	NA	NA	NA	NA	NA	NA	0.7	<2.2e-16	0.56	<2.2e-16	0.72	<2.2e-16	NA	NA	0.51	<2.2e-16	0.62	<2.2e-16	0.15	<2.2e-16	0.76	<2.2e-16	0.12	<2.2e-16	0.78	<2.2e-16	0.62	<2.2e-16	0.75	<2.2e-16	NA	NA	0.71	<2.2e-16	0.71	<2.2e-16
CHD2	K562	TSS	lincRNA	0.74	<2.2e-16	0.71	<2.2e-16	NA	NA	0.55	<2.2e-16	0.74	<2.2e-16	NA	NA	NA	NA	NA	NA	0.65	<2.2e-16	0.64	<2.2e-16	0.75	<2.2e-16	NA	NA	0.59	<2.2e-16	0.69	<2.2e-16	0.06	3e-07	0.67	<2.2e-16	0.03	0.03	0.76	<2.2e-16	0.52	<2.2e-16	0.79	<2.2e-16	0.71	<2.2e-16	NA	NA	0.5	<2.2e-16
CHD4	K562	TSS	lincRNA	0.53	<2.2e-16	0.48	<2.2e-16	NA	NA	0.45	<2.2e-16	0.48	<2.2e-16	NA	NA	NA	NA	NA	NA	0.47	<2.2e-16	0.44	<2.2e-16	0.56	<2.2e-16	NA	NA	0.4	<2.2e-16	0.49	<2.2e-16	0.25	<2.2e-16	0.67	<2.2e-16	0.24	<2.2e-16	0.56	<2.2e-16	0.51	<2.2e-16	0.56	<2.2e-16	0.71	<2.2e-16	0.5	<2.2e-16	NA	NA
CHD7	K562	TSS	lincRNA	0.6	<2.2e-16	0.6	<2.2e-16	NA	NA	0.48	<2.2e-16	0.62	<2.2e-16	NA	NA	NA	NA	NA	NA	0.56	<2.2e-16	0.56	<2.2e-16	0.64	<2.2e-16	NA	NA	0.54	<2.2e-16	0.62	<2.2e-16	0.26	<2.2e-16	0.66	<2.2e-16	0.23	<2.2e-16	0.64	<2.2e-16	0.51	<2.2e-16	0.68	<2.2e-16	0.78	<2.2e-16	0.63	<2.2e-16	0.75	<2.2e-16
COREST-RCOR1	K562	TSS	lincRNA	0.88	<2.2e-16	0.83	<2.2e-16	NA	NA	0.65	<2.2e-16	0.88	<2.2e-16	NA	NA	NA	NA	NA	NA	0.64	<2.2e-16	0.81	<2.2e-16	0.84	<2.2e-16	NA	NA	0.77	<2.2e-16	0.86	<2.2e-16	0.1	7e-15	0.71	<2.2e-16	0.05	2e-05	0.83	<2.2e-16	0.58	<2.2e-16	0.92	<2.2e-16	0.74	<2.2e-16	0.79	<2.2e-16	0.59	<2.2e-16
CREB1	K562	TSS	lincRNA	0.7	<2.2e-16	0.78	<2.2e-16	NA	NA	0.63	<2.2e-16	0.63	<2.2e-16	NA	NA	NA	NA	NA	NA	0.7	<2.2e-16	0.55	<2.2e-16	0.69	<2.2e-16	NA	NA	0.48	<2.2e-16	0.59	<2.2e-16	0.1	9e-16	0.8	<2.2e-16	0.08	4e-10	0.72	<2.2e-16	0.7	<2.2e-16	0.73	<2.2e-16	0.79	<2.2e-16	0.68	<2.2e-16	0.62	<2.2e-16
CREBBP	K562	TSS	lincRNA	0.42	<2.2e-16	0.44	<2.2e-16	NA	NA	0.3	<2.2e-16	0.47	<2.2e-16	NA	NA	NA	NA	NA	NA	0.32	<2.2e-16	0.46	<2.2e-16	0.38	<2.2e-16	NA	NA	0.46	<2.2e-16	0.47	<2.2e-16	0.26	<2.2e-16	0.4	<2.2e-16	0.23	<2.2e-16	0.33	<2.2e-16	0.34	<2.2e-16	0.4	<2.2e-16	0.5	<2.2e-16	0.38	<2.2e-16	0.55	<2.2e-16
CTCF	K562	TSS	lincRNA	0.41	<2.2e-16	0.35	<2.2e-16	NA	NA	0.29	<2.2e-16	0.38	<2.2e-16	NA	NA	NA	NA	NA	NA	0.3	<2.2e-16	0.37	<2.2e-16	0.41	<2.2e-16	NA	NA	0.34	<2.2e-16	0.41	<2.2e-16	0.09	4e-13	0.38	<2.2e-16	0.06	2e-07	0.36	<2.2e-16	0.28	<2.2e-16	0.4	<2.2e-16	0.32	<2.2e-16	0.34	<2.2e-16	0.31	<2.2e-16
CTCFL	K562	TSS	lincRNA	0.58	<2.2e-16	0.58	<2.2e-16	NA	NA	0.47	<2.2e-16	0.6	<2.2e-16	NA	NA	NA	NA	NA	NA	0.56	<2.2e-16	0.51	<2.2e-16	0.65	<2.2e-16	NA	NA	0.5	<2.2e-16	0.58	<2.2e-16	0.12	<2.2e-16	0.58	<2.2e-16	0.08	9e-12	0.69	<2.2e-16	0.43	<2.2e-16	0.68	<2.2e-16	0.62	<2.2e-16	0.62	<2.2e-16	0.48	<2.2e-16
CUX1	K562	TSS	lincRNA	0.93	<2.2e-16	0.82	<2.2e-16	NA	NA	0.62	<2.2e-16	0.9	<2.2e-16	NA	NA	NA	NA	NA	NA	0.59	<2.2e-16	0.86	<2.2e-16	0.76	<2.2e-16	NA	NA	0.81	<2.2e-16	0.87	<2.2e-16	0.07	2e-08	0.63	<2.2e-16	0.03	0.02	0.73	<2.2e-16	0.55	<2.2e-16	0.85	<2.2e-16	0.67	<2.2e-16	0.72	<2.2e-16	0.51	<2.2e-16
E2F4	K562	TSS	lincRNA	0.71	<2.2e-16	0.75	<2.2e-16	NA	NA	0.6	<2.2e-16	0.71	<2.2e-16	NA	NA	NA	NA	NA	NA	0.69	<2.2e-16	0.61	<2.2e-16	0.83	<2.2e-16	NA	NA	0.59	<2.2e-16	0.71	<2.2e-16	0.1	3e-15	0.74	<2.2e-16	0.06	3e-07	0.87	<2.2e-16	0.54	<2.2e-16	0.84	<2.2e-16	0.79	<2.2e-16	0.8	<2.2e-16	0.58	<2.2e-16
E2F6	K562	TSS	lincRNA	0.61	<2.2e-16	0.62	<2.2e-16	NA	NA	0.53	<2.2e-16	0.6	<2.2e-16	NA	NA	NA	NA	NA	NA	0.62	<2.2e-16	0.49	<2.2e-16	0.77	<2.2e-16	NA	NA	0.45	<2.2e-16	0.56	<2.2e-16	0.08	1e-09	0.73	<2.2e-16	0.05	5e-05	0.79	<2.2e-16	0.48	<2.2e-16	0.71	<2.2e-16	0.69	<2.2e-16	0.71	<2.2e-16	0.51	<2.2e-16
EGFP-HDAC8	K562	TSS	lincRNA	0.58	<2.2e-16	0.6	<2.2e-16	NA	NA	0.5	<2.2e-16	0.57	<2.2e-16	NA	NA	NA	NA	NA	NA	0.5	<2.2e-16	0.51	<2.2e-16	0.68	<2.2e-16	NA	NA	0.49	<2.2e-16	0.6	<2.2e-16	0.09	1e-12	0.6	<2.2e-16	0.06	6e-06	0.69	<2.2e-16	0.45	<2.2e-16	0.75	<2.2e-16	0.62	<2.2e-16	0.63	<2.2e-16	0.54	<2.2e-16
EGFP-JUNB	K562	TSS	lincRNA	0.7	<2.2e-16	0.7	<2.2e-16	NA	NA	0.71	<2.2e-16	0.63	<2.2e-16	NA	NA	NA	NA	NA	NA	0.56	<2.2e-16	0.56	<2.2e-16	0.73	<2.2e-16	NA	NA	0.52	<2.2e-16	0.64	<2.2e-16	0.07	2e-07	0.67	<2.2e-16	0.04	2	0.72	<2.2e-16	0.57	<2.2e-16	0.79	<2.2e-16	0.63	<2.2e-16	0.64	<2.2e-16	0.53	<2.2e-16
EGFP-NR4A1	K562	TSS	lincRNA	0.21	<2.2e-16	0.3	<2.2e-16	NA	NA	0.21	<2.2e-16	0.27	<2.2e-16	NA	NA	NA	NA	NA	NA	0.2	<2.2e-16	0.25	<2.2e-16	0.38	<2.2e-16	NA	NA	0.28	<2.2e-16	0.35	<2.2e-16	0.1	5e-15	0.28	<2.2e-16	0.06	2e-06	0.35	<2.2e-16	0.18	<2.2e-16	0.42	<2.2e-16	0.3	<2.2e-16	0.33	<2.2e-16	0.3	<2.2e-16
EGR1	K562	TSS	lincRNA	0.53	<2.2e-16	0.53	<2.2e-16	NA	NA	0.5	<2.2e-16	0.51	<2.2e-16	NA	NA	NA	NA	NA	NA	0.58	<2.2e-16	0.4	<2.2e-16	0.64	<2.2e-16	NA	NA	0.37	<2.2e-16	0.46	<2.2e-16	0.07	2e-08	0.61	<2.2e-16	0.06	3e-06	0.74	<2.2e-16	0.44	<2.2e-16	0.64	<2.2e-16	0.62	<2.2e-16	0.59	<2.2e-16	0.49	<2.2e-16
ELF1	K562	TSS	lincRNA	0.57	<2.2e-16	0.6	<2.2e-16	NA	NA	0.5	<2.2e-16	0.52	<2.2e-16	NA	NA	NA	NA	NA	NA	0.63	<2.2e-16	0.45	<2.2e-16	0.62	<2.2e-16	NA	NA	0.39	<2.2e-16	0.5	<2.2e-16	0.03	0.03	0.65	<2.2e-16	0.01	0.5	0.63	<2.2e-16	0.5	<2.2e-16	0.63	<2.2e-16	0.64	<2.2e-16	0.62	<2.2e-16	0.44	<2.2e-16
ELK1	K562	TSS	lincRNA	0.87	<2.2e-16	0.82	<2.2e-16	NA	NA	0.6	<2.2e-16	0.9	<2.2e-16	NA	NA	NA	NA	NA	NA	0.66	<2.2e-16	0.82	<2.2e-16	0.8	<2.2e-16	NA	NA	0.78	<2.2e-16	0.85	<2.2e-16	0.08	1e-11	0.66	<2.2e-16	0.04	2	0.8	<2.2e-16	0.53	<2.2e-16	0.87	<2.2e-16	0.74	<2.2e-16	0.8	<2.2e-16	0.52	<2.2e-16
ETS1	K562	TSS	lincRNA	0.63	<2.2e-16	0.65	<2.2e-16	NA	NA	0.57	<2.2e-16	0.61	<2.2e-16	NA	NA	NA	NA	NA	NA	0.74	<2.2e-16	0.49	<2.2e-16	0.76	<2.2e-16	NA	NA	0.45	<2.2e-16	0.57	<2.2e-16	0.05	3e-05	0.73	<2.2e-16	0.03	0.03	0.83	<2.2e-16	0.53	<2.2e-16	0.75	<2.2e-16	0.76	<2.2e-16	0.72	<2.2e-16	0.54	<2.2e-16
EZH2	K562	TSS	lincRNA	0.33	<2.2e-16	0.34	<2.2e-16	NA	NA	0.21	<2.2e-16	0.37	<2.2e-16	NA	NA	NA	NA	NA	NA	0.21	<2.2e-16	0.36	<2.2e-16	0.31	<2.2e-16	NA	NA	0.36	<2.2e-16	0.39	<2.2e-16	0.74	<2.2e-16	0.26	<2.2e-16	0.69	<2.2e-16	0.24	<2.2e-16	0.24	<2.2e-16	0.33	<2.2e-16	0.36	<2.2e-16	0.29	<2.2e-16	0.39	<2.2e-16
FOSL1	K562	TSS	lincRNA	0.63	<2.2e-16	0.62	<2.2e-16	NA	NA	0.73	<2.2e-16	0.58	<2.2e-16	NA	NA	NA	NA	NA	NA	0.5	<2.2e-16	0.53	<2.2e-16	0.61	<2.2e-16	NA	NA	0.47	<2.2e-16	0.56	<2.2e-16	0.05	2e-05	0.62	<2.2e-16	0.03	0.04	0.57	<2.2e-16	0.52	<2.2e-16	0.65	<2.2e-16	0.51	<2.2e-16	0.53	<2.2e-16	0.48	<2.2e-16
GABP	K562	TSS	lincRNA	0.43	<2.2e-16	0.44	<2.2e-16	NA	NA	0.36	<2.2e-16	0.38	<2.2e-16	NA	NA	NA	NA	NA	NA	0.52	<2.2e-16	0.33	<2.2e-16	0.45	<2.2e-16	NA	NA	0.28	<2.2e-16	0.37	<2.2e-16	0.01	0.3	0.49	<2.2e-16	0	1	0.46	<2.2e-16	0.38	<2.2e-16	0.49	<2.2e-16	0.47	<2.2e-16	0.45	<2.2e-16	0.3	<2.2e-16
GATA1	K562	TSS	lincRNA	0.91	<2.2e-16	0.82	<2.2e-16	NA	NA	0.64	<2.2e-16	0.85	<2.2e-16	NA	NA	NA	NA	NA	NA	0.61	<2.2e-16	0.82	<2.2e-16	0.78	<2.2e-16	NA	NA	0.76	<2.2e-16	0.85	<2.2e-16	0.08	7e-10	0.67	<2.2e-16	0.04	2	0.79	<2.2e-16	0.61	<2.2e-16	0.89	<2.2e-16	0.7	<2.2e-16	0.74	<2.2e-16	0.55	<2.2e-16
GTF2B	K562	TSS	lincRNA	0.82	<2.2e-16	0.77	<2.2e-16	NA	NA	0.62	<2.2e-16	0.82	<2.2e-16	NA	NA	NA	NA	NA	NA	0.72	<2.2e-16	0.73	<2.2e-16	0.77	<2.2e-16	NA	NA	0.67	<2.2e-16	0.78	<2.2e-16	0.04	3	0.68	<2.2e-16	0	1	0.78	<2.2e-16	0.58	<2.2e-16	0.85	<2.2e-16	0.76	<2.2e-16	0.79	<2.2e-16	0.49	<2.2e-16
GTF2F1	K562	TSS	lincRNA	0.85	<2.2e-16	0.82	<2.2e-16	NA	NA	0.6	<2.2e-16	0.89	<2.2e-16	NA	NA	NA	NA	NA	NA	0.7	<2.2e-16	0.79	<2.2e-16	0.82	<2.2e-16	NA	NA	0.76	<2.2e-16	0.84	<2.2e-16	0.08	5e-11	0.69	<2.2e-16	0.04	5	0.82	<2.2e-16	0.55	<2.2e-16	0.88	<2.2e-16	0.77	<2.2e-16	0.82	<2.2e-16	0.52	<2.2e-16
GTF3C2	K562	TSS	lincRNA	0.74	<2.2e-16	0.7	<2.2e-16	NA	NA	0.64	<2.2e-16	0.68	<2.2e-16	NA	NA	NA	NA	NA	NA	0.63	<2.2e-16	0.66	<2.2e-16	0.75	<2.2e-16	NA	NA	0.6	<2.2e-16	0.71	<2.2e-16	0.09	2e-12	0.72	<2.2e-16	0.06	3e-06	0.76	<2.2e-16	0.57	<2.2e-16	0.78	<2.2e-16	0.7	<2.2e-16	0.71	<2.2e-16	0.59	<2.2e-16
H2AZ	K562	TSS	lincRNA	0.72	<2.2e-16	0.65	<2.2e-16	NA	NA	0.55	<2.2e-16	0.63	<2.2e-16	NA	NA	NA	NA	NA	NA	0.57	<2.2e-16	0.59	<2.2e-16	0.67	<2.2e-16	NA	NA	0.52	<2.2e-16	0.63	<2.2e-16	0.13	<2.2e-16	0.78	<2.2e-16	0.12	<2.2e-16	0.66	<2.2e-16	0.57	<2.2e-16	0.7	<2.2e-16	0.72	<2.2e-16	0.65	<2.2e-16	0.67	<2.2e-16
H3K27AC	K562	TSS	lincRNA	0.69	<2.2e-16	0.66	<2.2e-16	NA	NA	0.63	<2.2e-16	0.6	<2.2e-16	NA	NA	NA	NA	NA	NA	0.71	<2.2e-16	0.48	<2.2e-16	0.69	<2.2e-16	NA	NA	0.41	<2.2e-16	0.55	<2.2e-16	0.02	0.2	0.8	<2.2e-16	0	1	0.71	<2.2e-16	0.7	<2.2e-16	0.72	<2.2e-16	0.85	<2.2e-16	0.66	<2.2e-16	0.6	<2.2e-16
H3K27ME3	K562	TSS	lincRNA	-0.05	0.0003	0.06	2e-07	NA	NA	-0.07	3e-08	0.08	4e-10	NA	NA	NA	NA	NA	NA	-0.09	1e-13	0.08	2e-10	0.04	5	NA	NA	0.13	<2.2e-16	0.12	<2.2e-16	0.52	<2.2e-16	-0.12	<2.2e-16	0.45	<2.2e-16	-0.04	0.0005	-0.09	2e-14	0.05	0.0003	-0.03	9	0.02	0.06	-0.06	2e-06
H3K36ME3	K562	TSS	lincRNA	0.53	<2.2e-16	0.45	<2.2e-16	NA	NA	0.36	<2.2e-16	0.51	<2.2e-16	NA	NA	NA	NA	NA	NA	0.43	<2.2e-16	0.5	<2.2e-16	0.43	<2.2e-16	NA	NA	0.46	<2.2e-16	0.51	<2.2e-16	0.04	2	0.47	<2.2e-16	0.03	0.02	0.43	<2.2e-16	0.41	<2.2e-16	0.51	<2.2e-16	0.56	<2.2e-16	0.47	<2.2e-16	0.49	<2.2e-16
H3K4ME1	K562	TSS	lincRNA	0.68	<2.2e-16	0.6	<2.2e-16	NA	NA	0.54	<2.2e-16	0.6	<2.2e-16	NA	NA	NA	NA	NA	NA	0.44	<2.2e-16	0.59	<2.2e-16	0.64	<2.2e-16	NA	NA	0.54	<2.2e-16	0.64	<2.2e-16	0.1	6e-15	0.68	<2.2e-16	0.08	4e-11	0.59	<2.2e-16	0.55	<2.2e-16	0.71	<2.2e-16	0.6	<2.2e-16	0.54	<2.2e-16	0.69	<2.2e-16
H3K4ME2	K562	TSS	lincRNA	0.68	<2.2e-16	0.67	<2.2e-16	NA	NA	0.58	<2.2e-16	0.6	<2.2e-16	NA	NA	NA	NA	NA	NA	0.7	<2.2e-16	0.51	<2.2e-16	0.72	<2.2e-16	NA	NA	0.45	<2.2e-16	0.58	<2.2e-16	0.07	6e-09	0.81	<2.2e-16	0.06	5e-06	0.77	<2.2e-16	0.63	<2.2e-16	0.73	<2.2e-16	0.89	<2.2e-16	0.71	<2.2e-16	0.64	<2.2e-16
H3K4ME3	K562	TSS	lincRNA	0.68	<2.2e-16	0.65	<2.2e-16	NA	NA	0.55	<2.2e-16	0.59	<2.2e-16	NA	NA	NA	NA	NA	NA	0.71	<2.2e-16	0.5	<2.2e-16	0.69	<2.2e-16	NA	NA	0.43	<2.2e-16	0.55	<2.2e-16	0.07	1e-08	0.78	<2.2e-16	0.06	7e-06	0.75	<2.2e-16	0.62	<2.2e-16	0.71	<2.2e-16	0.9	<2.2e-16	0.7	<2.2e-16	0.61	<2.2e-16
H3K79ME2	K562	TSS	lincRNA	0.53	<2.2e-16	0.5	<2.2e-16	NA	NA	0.41	<2.2e-16	0.47	<2.2e-16	NA	NA	NA	NA	NA	NA	0.59	<2.2e-16	0.37	<2.2e-16	0.53	<2.2e-16	NA	NA	0.32	<2.2e-16	0.43	<2.2e-16	0.01	0.3	0.58	<2.2e-16	0	0.8	0.59	<2.2e-16	0.49	<2.2e-16	0.56	<2.2e-16	0.8	<2.2e-16	0.57	<2.2e-16	0.45	<2.2e-16
H3K9AC	K562	TSS	lincRNA	0.68	<2.2e-16	0.65	<2.2e-16	NA	NA	0.59	<2.2e-16	0.6	<2.2e-16	NA	NA	NA	NA	NA	NA	0.73	<2.2e-16	0.48	<2.2e-16	0.69	<2.2e-16	NA	NA	0.42	<2.2e-16	0.54	<2.2e-16	0.03	6	0.78	<2.2e-16	0.02	0.2	0.74	<2.2e-16	0.65	<2.2e-16	0.71	<2.2e-16	0.9	<2.2e-16	0.69	<2.2e-16	0.6	<2.2e-16
H3K9ME1	K562	TSS	lincRNA	0.52	<2.2e-16	0.52	<2.2e-16	NA	NA	0.36	<2.2e-16	0.57	<2.2e-16	NA	NA	NA	NA	NA	NA	0.32	<2.2e-16	0.58	<2.2e-16	0.5	<2.2e-16	NA	NA	0.58	<2.2e-16	0.62	<2.2e-16	0.35	<2.2e-16	0.46	<2.2e-16	0.31	<2.2e-16	0.41	<2.2e-16	0.37	<2.2e-16	0.55	<2.2e-16	0.53	<2.2e-16	0.47	<2.2e-16	0.61	<2.2e-16
H3K9ME3	K562	TSS	lincRNA	0.33	<2.2e-16	0.3	<2.2e-16	NA	NA	0.19	<2.2e-16	0.37	<2.2e-16	NA	NA	NA	NA	NA	NA	0.19	<2.2e-16	0.38	<2.2e-16	0.22	<2.2e-16	NA	NA	0.35	<2.2e-16	0.34	<2.2e-16	0.12	<2.2e-16	0.32	<2.2e-16	0.11	<2.2e-16	0.17	<2.2e-16	0.22	<2.2e-16	0.21	<2.2e-16	0.3	<2.2e-16	0.25	<2.2e-16	0.35	<2.2e-16
H4K20ME1	K562	TSS	lincRNA	0.34	<2.2e-16	0.4	<2.2e-16	NA	NA	0.25	<2.2e-16	0.41	<2.2e-16	NA	NA	NA	NA	NA	NA	0.3	<2.2e-16	0.37	<2.2e-16	0.41	<2.2e-16	NA	NA	0.4	<2.2e-16	0.43	<2.2e-16	0.45	<2.2e-16	0.31	<2.2e-16	0.4	<2.2e-16	0.36	<2.2e-16	0.25	<2.2e-16	0.44	<2.2e-16	0.5	<2.2e-16	0.41	<2.2e-16	0.44	<2.2e-16
HCFC1	K562	TSS	lincRNA	0.71	<2.2e-16	0.78	<2.2e-16	NA	NA	0.57	<2.2e-16	0.69	<2.2e-16	NA	NA	NA	NA	NA	NA	0.68	<2.2e-16	0.6	<2.2e-16	0.74	<2.2e-16	NA	NA	0.55	<2.2e-16	0.67	<2.2e-16	0.06	2e-06	0.7	<2.2e-16	0.03	0.02	0.75	<2.2e-16	0.55	<2.2e-16	0.76	<2.2e-16	0.73	<2.2e-16	0.75	<2.2e-16	0.5	<2.2e-16
HDAC1	K562	TSS	lincRNA	0.67	<2.2e-16	0.69	<2.2e-16	NA	NA	0.55	<2.2e-16	0.64	<2.2e-16	NA	NA	NA	NA	NA	NA	0.64	<2.2e-16	0.56	<2.2e-16	0.77	<2.2e-16	NA	NA	0.53	<2.2e-16	0.64	<2.2e-16	0.19	<2.2e-16	0.77	<2.2e-16	0.16	<2.2e-16	0.79	<2.2e-16	0.58	<2.2e-16	0.77	<2.2e-16	0.88	<2.2e-16	0.71	<2.2e-16	0.75	<2.2e-16
HDAC2	K562	TSS	lincRNA	0.61	<2.2e-16	0.62	<2.2e-16	NA	NA	0.52	<2.2e-16	0.61	<2.2e-16	NA	NA	NA	NA	NA	NA	0.55	<2.2e-16	0.54	<2.2e-16	0.73	<2.2e-16	NA	NA	0.52	<2.2e-16	0.62	<2.2e-16	0.25	<2.2e-16	0.72	<2.2e-16	0.22	<2.2e-16	0.73	<2.2e-16	0.52	<2.2e-16	0.73	<2.2e-16	0.79	<2.2e-16	0.66	<2.2e-16	0.78	<2.2e-16
HDAC6	K562	TSS	lincRNA	0.5	<2.2e-16	0.55	<2.2e-16	NA	NA	0.42	<2.2e-16	0.56	<2.2e-16	NA	NA	NA	NA	NA	NA	0.47	<2.2e-16	0.51	<2.2e-16	0.59	<2.2e-16	NA	NA	0.52	<2.2e-16	0.57	<2.2e-16	0.32	<2.2e-16	0.58	<2.2e-16	0.29	<2.2e-16	0.57	<2.2e-16	0.43	<2.2e-16	0.6	<2.2e-16	0.7	<2.2e-16	0.57	<2.2e-16	0.69	<2.2e-16
HMGN3	K562	TSS	lincRNA	0.72	<2.2e-16	0.7	<2.2e-16	NA	NA	0.57	<2.2e-16	0.72	<2.2e-16	NA	NA	NA	NA	NA	NA	0.66	<2.2e-16	0.6	<2.2e-16	0.83	<2.2e-16	NA	NA	0.58	<2.2e-16	0.69	<2.2e-16	0.08	4e-10	0.69	<2.2e-16	0.05	0.0002	0.95	<2.2e-16	0.5	<2.2e-16	0.87	<2.2e-16	0.76	<2.2e-16	0.77	<2.2e-16	0.58	<2.2e-16
IRF1	K562	TSS	lincRNA	0.85	<2.2e-16	0.76	<2.2e-16	NA	NA	0.56	<2.2e-16	0.84	<2.2e-16	NA	NA	NA	NA	NA	NA	0.54	<2.2e-16	0.81	<2.2e-16	0.68	<2.2e-16	NA	NA	0.76	<2.2e-16	0.81	<2.2e-16	0.01	0.4	0.53	<2.2e-16	-0.03	0.02	0.65	<2.2e-16	0.47	<2.2e-16	0.78	<2.2e-16	0.57	<2.2e-16	0.67	<2.2e-16	0.36	<2.2e-16
JARID1B-PLU1	K562	TSS	lincRNA	0.64	<2.2e-16	0.65	<2.2e-16	NA	NA	0.57	<2.2e-16	0.6	<2.2e-16	NA	NA	NA	NA	NA	NA	0.73	<2.2e-16	0.49	<2.2e-16	0.72	<2.2e-16	NA	NA	0.44	<2.2e-16	0.57	<2.2e-16	0.13	<2.2e-16	0.8	<2.2e-16	0.11	<2.2e-16	0.79	<2.2e-16	0.63	<2.2e-16	0.74	<2.2e-16	0.91	<2.2e-16	0.72	<2.2e-16	0.68	<2.2e-16
JUN	K562	TSS	lincRNA	0.89	<2.2e-16	0.87	<2.2e-16	NA	NA	0.76	<2.2e-16	0.84	<2.2e-16	NA	NA	NA	NA	NA	NA	0.66	<2.2e-16	0.78	<2.2e-16	0.85	<2.2e-16	NA	NA	0.72	<2.2e-16	0.83	<2.2e-16	0.08	5e-10	0.76	<2.2e-16	0.04	2	0.83	<2.2e-16	0.64	<2.2e-16	0.89	<2.2e-16	0.75	<2.2e-16	0.77	<2.2e-16	0.59	<2.2e-16
KAP1	K562	TSS	lincRNA	0.78	<2.2e-16	0.65	<2.2e-16	NA	NA	0.47	<2.2e-16	0.8	<2.2e-16	NA	NA	NA	NA	NA	NA	0.49	<2.2e-16	0.74	<2.2e-16	0.57	<2.2e-16	NA	NA	0.68	<2.2e-16	0.71	<2.2e-16	-0.03	8	0.52	<2.2e-16	-0.06	4e-07	0.57	<2.2e-16	0.42	<2.2e-16	0.65	<2.2e-16	0.51	<2.2e-16	0.59	<2.2e-16	0.35	<2.2e-16
KAT2B-PCAF	K562	TSS	lincRNA	0.54	<2.2e-16	0.55	<2.2e-16	NA	NA	0.42	<2.2e-16	0.54	<2.2e-16	NA	NA	NA	NA	NA	NA	0.48	<2.2e-16	0.5	<2.2e-16	0.53	<2.2e-16	NA	NA	0.48	<2.2e-16	0.54	<2.2e-16	0.31	<2.2e-16	0.59	<2.2e-16	0.29	<2.2e-16	0.52	<2.2e-16	0.47	<2.2e-16	0.54	<2.2e-16	0.71	<2.2e-16	0.5	<2.2e-16	0.74	<2.2e-16
KDM1A-LSD1	K562	TSS	lincRNA	0.63	<2.2e-16	0.58	<2.2e-16	NA	NA	0.54	<2.2e-16	0.55	<2.2e-16	NA	NA	NA	NA	NA	NA	0.49	<2.2e-16	0.52	<2.2e-16	0.62	<2.2e-16	NA	NA	0.47	<2.2e-16	0.56	<2.2e-16	0.23	<2.2e-16	0.71	<2.2e-16	0.22	<2.2e-16	0.61	<2.2e-16	0.6	<2.2e-16	0.65	<2.2e-16	0.72	<2.2e-16	0.53	<2.2e-16	0.81	<2.2e-16
MAFF	K562	TSS	lincRNA	0.82	<2.2e-16	0.74	<2.2e-16	NA	NA	0.59	<2.2e-16	0.85	<2.2e-16	NA	NA	NA	NA	NA	NA	0.55	<2.2e-16	0.77	<2.2e-16	0.68	<2.2e-16	NA	NA	0.71	<2.2e-16	0.78	<2.2e-16	0.05	6e-05	0.56	<2.2e-16	0.01	0.6	0.62	<2.2e-16	0.53	<2.2e-16	0.74	<2.2e-16	0.59	<2.2e-16	0.68	<2.2e-16	0.44	<2.2e-16
MAFK	K562	TSS	lincRNA	0.86	<2.2e-16	0.8	<2.2e-16	NA	NA	0.64	<2.2e-16	0.88	<2.2e-16	NA	NA	NA	NA	NA	NA	0.58	<2.2e-16	0.8	<2.2e-16	0.75	<2.2e-16	NA	NA	0.75	<2.2e-16	0.82	<2.2e-16	0.07	4e-08	0.63	<2.2e-16	0.03	0.03	0.71	<2.2e-16	0.56	<2.2e-16	0.81	<2.2e-16	0.65	<2.2e-16	0.7	<2.2e-16	0.51	<2.2e-16
MAX	K562	TSS	lincRNA	0.74	<2.2e-16	0.74	<2.2e-16	NA	NA	0.63	<2.2e-16	0.71	<2.2e-16	NA	NA	NA	NA	NA	NA	0.7	<2.2e-16	0.61	<2.2e-16	0.88	<2.2e-16	NA	NA	0.55	<2.2e-16	0.68	<2.2e-16	0.05	2e-05	0.79	<2.2e-16	0.03	0.04	0.86	<2.2e-16	0.6	<2.2e-16	0.83	<2.2e-16	0.79	<2.2e-16	0.77	<2.2e-16	0.58	<2.2e-16
MAZ	K562	TSS	lincRNA	0.77	<2.2e-16	0.75	<2.2e-16	NA	NA	0.62	<2.2e-16	0.74	<2.2e-16	NA	NA	NA	NA	NA	NA	0.69	<2.2e-16	0.63	<2.2e-16	0.84	<2.2e-16	NA	NA	0.59	<2.2e-16	0.71	<2.2e-16	0.07	5e-08	0.75	<2.2e-16	0.04	3	0.92	<2.2e-16	0.56	<2.2e-16	0.87	<2.2e-16	0.8	<2.2e-16	0.78	<2.2e-16	0.61	<2.2e-16
MEF2A	K562	TSS	lincRNA	0.74	<2.2e-16	0.68	<2.2e-16	NA	NA	0.64	<2.2e-16	0.67	<2.2e-16	NA	NA	NA	NA	NA	NA	0.67	<2.2e-16	0.62	<2.2e-16	0.65	<2.2e-16	NA	NA	0.55	<2.2e-16	0.65	<2.2e-16	0.06	2e-07	0.67	<2.2e-16	0.04	3	0.66	<2.2e-16	0.61	<2.2e-16	0.72	<2.2e-16	0.64	<2.2e-16	0.63	<2.2e-16	0.48	<2.2e-16
MXI1	K562	TSS	lincRNA	0.85	<2.2e-16	0.81	<2.2e-16	NA	NA	0.63	<2.2e-16	0.85	<2.2e-16	NA	NA	NA	NA	NA	NA	0.7	<2.2e-16	0.75	<2.2e-16	0.81	<2.2e-16	NA	NA	0.69	<2.2e-16	0.78	<2.2e-16	0.05	0.0002	0.69	<2.2e-16	0.01	0.5	0.82	<2.2e-16	0.56	<2.2e-16	0.86	<2.2e-16	0.76	<2.2e-16	0.81	<2.2e-16	0.51	<2.2e-16
MYC	K562	TSS	lincRNA	0.79	<2.2e-16	0.74	<2.2e-16	NA	NA	0.63	<2.2e-16	0.74	<2.2e-16	NA	NA	NA	NA	NA	NA	0.74	<2.2e-16	0.64	<2.2e-16	0.83	<2.2e-16	NA	NA	0.58	<2.2e-16	0.7	<2.2e-16	0.07	9e-09	0.79	<2.2e-16	0.04	0.0009	0.84	<2.2e-16	0.63	<2.2e-16	0.83	<2.2e-16	0.85	<2.2e-16	0.77	<2.2e-16	0.63	<2.2e-16
NCOR1	K562	TSS	lincRNA	0.45	<2.2e-16	0.42	<2.2e-16	NA	NA	0.41	<2.2e-16	0.4	<2.2e-16	NA	NA	NA	NA	NA	NA	0.42	<2.2e-16	0.37	<2.2e-16	0.47	<2.2e-16	NA	NA	0.33	<2.2e-16	0.39	<2.2e-16	0.3	<2.2e-16	0.59	<2.2e-16	0.29	<2.2e-16	0.47	<2.2e-16	0.49	<2.2e-16	0.45	<2.2e-16	0.66	<2.2e-16	0.41	<2.2e-16	0.77	<2.2e-16
NFE2	K562	TSS	lincRNA	0.69	<2.2e-16	0.71	<2.2e-16	NA	NA	0.52	<2.2e-16	0.78	<2.2e-16	NA	NA	NA	NA	NA	NA	0.49	<2.2e-16	0.72	<2.2e-16	0.71	<2.2e-16	NA	NA	0.7	<2.2e-16	0.78	<2.2e-16	0.13	<2.2e-16	0.57	<2.2e-16	0.08	3e-11	0.65	<2.2e-16	0.43	<2.2e-16	0.75	<2.2e-16	0.6	<2.2e-16	0.67	<2.2e-16	0.48	<2.2e-16
NFYA	K562	TSS	lincRNA	0.71	<2.2e-16	0.74	<2.2e-16	NA	NA	0.52	<2.2e-16	0.71	<2.2e-16	NA	NA	NA	NA	NA	NA	0.52	<2.2e-16	0.65	<2.2e-16	0.69	<2.2e-16	NA	NA	0.62	<2.2e-16	0.7	<2.2e-16	0.04	3	0.57	<2.2e-16	0	0.9	0.68	<2.2e-16	0.46	<2.2e-16	0.75	<2.2e-16	0.6	<2.2e-16	0.72	<2.2e-16	0.41	<2.2e-16
NFYB	K562	TSS	lincRNA	0.33	<2.2e-16	0.42	<2.2e-16	NA	NA	0.27	<2.2e-16	0.33	<2.2e-16	NA	NA	NA	NA	NA	NA	0.31	<2.2e-16	0.28	<2.2e-16	0.4	<2.2e-16	NA	NA	0.27	<2.2e-16	0.33	<2.2e-16	0.02	0.09	0.36	<2.2e-16	0	0.9	0.4	<2.2e-16	0.26	<2.2e-16	0.41	<2.2e-16	0.36	<2.2e-16	0.46	<2.2e-16	0.23	<2.2e-16
NR2F2	K562	TSS	lincRNA	0.71	<2.2e-16	0.66	<2.2e-16	NA	NA	0.67	<2.2e-16	0.6	<2.2e-16	NA	NA	NA	NA	NA	NA	0.71	<2.2e-16	0.53	<2.2e-16	0.69	<2.2e-16	NA	NA	0.45	<2.2e-16	0.58	<2.2e-16	0.05	4e-05	0.89	<2.2e-16	0.03	0.03	0.7	<2.2e-16	0.76	<2.2e-16	0.75	<2.2e-16	0.76	<2.2e-16	0.64	<2.2e-16	0.66	<2.2e-16
NRF1	K562	TSS	lincRNA	0.78	<2.2e-16	0.72	<2.2e-16	NA	NA	0.5	<2.2e-16	0.81	<2.2e-16	NA	NA	NA	NA	NA	NA	0.52	<2.2e-16	0.77	<2.2e-16	0.65	<2.2e-16	NA	NA	0.71	<2.2e-16	0.77	<2.2e-16	0.05	3e-05	0.52	<2.2e-16	0.01	0.5	0.64	<2.2e-16	0.43	<2.2e-16	0.71	<2.2e-16	0.57	<2.2e-16	0.65	<2.2e-16	0.35	<2.2e-16
P300	K562	TSS	lincRNA	0.86	<2.2e-16	0.74	<2.2e-16	NA	NA	0.54	<2.2e-16	0.87	<2.2e-16	NA	NA	NA	NA	NA	NA	0.54	<2.2e-16	0.8	<2.2e-16	0.65	<2.2e-16	NA	NA	0.75	<2.2e-16	0.78	<2.2e-16	0.02	0.1	0.51	<2.2e-16	-0.02	0.2	0.64	<2.2e-16	0.47	<2.2e-16	0.74	<2.2e-16	0.57	<2.2e-16	0.65	<2.2e-16	0.37	<2.2e-16
PHF8	K562	TSS	lincRNA	0.56	<2.2e-16	0.58	<2.2e-16	NA	NA	0.47	<2.2e-16	0.51	<2.2e-16	NA	NA	NA	NA	NA	NA	0.66	<2.2e-16	0.41	<2.2e-16	0.63	<2.2e-16	NA	NA	0.36	<2.2e-16	0.48	<2.2e-16	0.06	2e-07	0.72	<2.2e-16	0.05	3e-05	0.73	<2.2e-16	0.52	<2.2e-16	0.64	<2.2e-16	0.82	<2.2e-16	0.65	<2.2e-16	0.55	<2.2e-16
PML	K562	TSS	lincRNA	0.67	<2.2e-16	0.63	<2.2e-16	NA	NA	0.63	<2.2e-16	0.59	<2.2e-16	NA	NA	NA	NA	NA	NA	0.79	<2.2e-16	0.49	<2.2e-16	0.63	<2.2e-16	NA	NA	0.41	<2.2e-16	0.54	<2.2e-16	0.01	0.4	0.71	<2.2e-16	-0.01	0.6	0.68	<2.2e-16	0.71	<2.2e-16	0.74	<2.2e-16	0.71	<2.2e-16	0.64	<2.2e-16	0.46	<2.2e-16
POL2	K562	TSS	lincRNA	0.63	<2.2e-16	0.63	<2.2e-16	NA	NA	0.56	<2.2e-16	0.59	<2.2e-16	NA	NA	NA	NA	NA	NA	0.8	<2.2e-16	0.45	<2.2e-16	0.67	<2.2e-16	NA	NA	0.4	<2.2e-16	0.52	<2.2e-16	-0.01	0.4	0.71	<2.2e-16	-0.03	0.02	0.77	<2.2e-16	0.6	<2.2e-16	0.74	<2.2e-16	0.79	<2.2e-16	0.71	<2.2e-16	0.47	<2.2e-16
POL3	K562	TSS	lincRNA	0.55	<2.2e-16	0.52	<2.2e-16	NA	NA	0.39	<2.2e-16	0.58	<2.2e-16	NA	NA	NA	NA	NA	NA	0.33	<2.2e-16	0.64	<2.2e-16	0.47	<2.2e-16	NA	NA	0.6	<2.2e-16	0.64	<2.2e-16	0.05	2e-05	0.36	<2.2e-16	0.02	0.2	0.4	<2.2e-16	0.31	<2.2e-16	0.52	<2.2e-16	0.38	<2.2e-16	0.45	<2.2e-16	0.28	<2.2e-16
RAD21	K562	TSS	lincRNA	0.66	<2.2e-16	0.58	<2.2e-16	NA	NA	0.46	<2.2e-16	0.65	<2.2e-16	NA	NA	NA	NA	NA	NA	0.42	<2.2e-16	0.66	<2.2e-16	0.57	<2.2e-16	NA	NA	0.61	<2.2e-16	0.68	<2.2e-16	0.1	<2.2e-16	0.48	<2.2e-16	0.07	7e-08	0.49	<2.2e-16	0.41	<2.2e-16	0.6	<2.2e-16	0.45	<2.2e-16	0.53	<2.2e-16	0.38	<2.2e-16
RBBP5	K562	TSS	lincRNA	0.67	<2.2e-16	0.65	<2.2e-16	NA	NA	0.53	<2.2e-16	0.61	<2.2e-16	NA	NA	NA	NA	NA	NA	0.68	<2.2e-16	0.52	<2.2e-16	0.72	<2.2e-16	NA	NA	0.48	<2.2e-16	0.59	<2.2e-16	0.14	<2.2e-16	0.76	<2.2e-16	0.12	<2.2e-16	0.8	<2.2e-16	0.57	<2.2e-16	0.73	<2.2e-16	0.91	<2.2e-16	0.7	<2.2e-16	0.69	<2.2e-16
RDBP-NELF-E	K562	TSS	lincRNA	0.71	<2.2e-16	0.7	<2.2e-16	NA	NA	0.47	<2.2e-16	0.78	<2.2e-16	NA	NA	NA	NA	NA	NA	0.54	<2.2e-16	0.75	<2.2e-16	0.66	<2.2e-16	NA	NA	0.72	<2.2e-16	0.79	<2.2e-16	0.09	7e-14	0.53	<2.2e-16	0.05	8e-05	0.66	<2.2e-16	0.42	<2.2e-16	0.73	<2.2e-16	0.63	<2.2e-16	0.69	<2.2e-16	0.44	<2.2e-16
REST	K562	TSS	lincRNA	0.62	<2.2e-16	0.59	<2.2e-16	NA	NA	0.59	<2.2e-16	0.55	<2.2e-16	NA	NA	NA	NA	NA	NA	0.63	<2.2e-16	0.47	<2.2e-16	0.65	<2.2e-16	NA	NA	0.41	<2.2e-16	0.52	<2.2e-16	0.03	0.02	0.65	<2.2e-16	0.01	0.7	0.69	<2.2e-16	0.54	<2.2e-16	0.68	<2.2e-16	0.64	<2.2e-16	0.61	<2.2e-16	0.46	<2.2e-16
RFX5	K562	TSS	lincRNA	0.85	<2.2e-16	0.79	<2.2e-16	NA	NA	0.56	<2.2e-16	0.89	<2.2e-16	NA	NA	NA	NA	NA	NA	0.58	<2.2e-16	0.81	<2.2e-16	0.7	<2.2e-16	NA	NA	0.76	<2.2e-16	0.81	<2.2e-16	0.05	2e-05	0.56	<2.2e-16	0.01	0.4	0.68	<2.2e-16	0.48	<2.2e-16	0.77	<2.2e-16	0.63	<2.2e-16	0.72	<2.2e-16	0.42	<2.2e-16
RNF2	K562	TSS	lincRNA	0.24	<2.2e-16	0.24	<2.2e-16	NA	NA	0.22	<2.2e-16	0.22	<2.2e-16	NA	NA	NA	NA	NA	NA	0.24	<2.2e-16	0.19	<2.2e-16	0.3	<2.2e-16	NA	NA	0.18	<2.2e-16	0.23	<2.2e-16	0.83	<2.2e-16	0.35	<2.2e-16	0.83	<2.2e-16	0.28	<2.2e-16	0.27	<2.2e-16	0.25	<2.2e-16	0.43	<2.2e-16	0.25	<2.2e-16	0.54	<2.2e-16
RPC155	K562	TSS	lincRNA	0.8	<2.2e-16	0.73	<2.2e-16	NA	NA	0.57	<2.2e-16	0.8	<2.2e-16	NA	NA	NA	NA	NA	NA	0.53	<2.2e-16	0.82	<2.2e-16	0.68	<2.2e-16	NA	NA	0.76	<2.2e-16	0.82	<2.2e-16	0.09	5e-14	0.59	<2.2e-16	0.06	6e-06	0.64	<2.2e-16	0.49	<2.2e-16	0.75	<2.2e-16	0.61	<2.2e-16	0.66	<2.2e-16	0.51	<2.2e-16
SAP30	K562	TSS	lincRNA	0.65	<2.2e-16	0.67	<2.2e-16	NA	NA	0.52	<2.2e-16	0.63	<2.2e-16	NA	NA	NA	NA	NA	NA	0.65	<2.2e-16	0.54	<2.2e-16	0.72	<2.2e-16	NA	NA	0.5	<2.2e-16	0.61	<2.2e-16	0.15	<2.2e-16	0.74	<2.2e-16	0.13	<2.2e-16	0.75	<2.2e-16	0.57	<2.2e-16	0.71	<2.2e-16	0.88	<2.2e-16	0.69	<2.2e-16	0.68	<2.2e-16
SETDB1	K562	TSS	lincRNA	0.53	<2.2e-16	0.6	<2.2e-16	NA	NA	0.44	<2.2e-16	0.58	<2.2e-16	NA	NA	NA	NA	NA	NA	0.48	<2.2e-16	0.54	<2.2e-16	0.62	<2.2e-16	NA	NA	0.54	<2.2e-16	0.6	<2.2e-16	0.29	<2.2e-16	0.6	<2.2e-16	0.25	<2.2e-16	0.59	<2.2e-16	0.45	<2.2e-16	0.62	<2.2e-16	0.72	<2.2e-16	0.58	<2.2e-16	0.71	<2.2e-16
SIN3AK20	K562	TSS	lincRNA	0.65	<2.2e-16	0.65	<2.2e-16	NA	NA	0.55	<2.2e-16	0.62	<2.2e-16	NA	NA	NA	NA	NA	NA	0.75	<2.2e-16	0.5	<2.2e-16	0.74	<2.2e-16	NA	NA	0.45	<2.2e-16	0.57	<2.2e-16	0.03	0.05	0.7	<2.2e-16	0	0.8	0.79	<2.2e-16	0.55	<2.2e-16	0.74	<2.2e-16	0.78	<2.2e-16	0.73	<2.2e-16	0.49	<2.2e-16
SIRT6	K562	TSS	lincRNA	0.9	<2.2e-16	0.8	<2.2e-16	NA	NA	0.64	<2.2e-16	0.84	<2.2e-16	NA	NA	NA	NA	NA	NA	0.61	<2.2e-16	0.86	<2.2e-16	0.77	<2.2e-16	NA	NA	0.76	<2.2e-16	0.87	<2.2e-16	0.08	2e-11	0.68	<2.2e-16	0.05	7e-05	0.71	<2.2e-16	0.61	<2.2e-16	0.82	<2.2e-16	0.69	<2.2e-16	0.71	<2.2e-16	0.54	<2.2e-16
SIX5	K562	TSS	lincRNA	0.38	<2.2e-16	0.48	<2.2e-16	NA	NA	0.34	<2.2e-16	0.35	<2.2e-16	NA	NA	NA	NA	NA	NA	0.44	<2.2e-16	0.3	<2.2e-16	0.44	<2.2e-16	NA	NA	0.26	<2.2e-16	0.34	<2.2e-16	0.02	0.06	0.42	<2.2e-16	0.01	0.7	0.4	<2.2e-16	0.36	<2.2e-16	0.41	<2.2e-16	0.44	<2.2e-16	0.44	<2.2e-16	0.27	<2.2e-16
SMARCA4-BRG1	K562	TSS	lincRNA	0.91	<2.2e-16	0.77	<2.2e-16	NA	NA	0.65	<2.2e-16	0.85	<2.2e-16	NA	NA	NA	NA	NA	NA	0.7	<2.2e-16	0.77	<2.2e-16	0.77	<2.2e-16	NA	NA	0.7	<2.2e-16	0.79	<2.2e-16	0.03	0.03	0.7	<2.2e-16	0	0.9	0.79	<2.2e-16	0.62	<2.2e-16	0.87	<2.2e-16	0.76	<2.2e-16	0.78	<2.2e-16	0.56	<2.2e-16
SMARCB1-INI1	K562	TSS	lincRNA	0.91	<2.2e-16	0.78	<2.2e-16	NA	NA	0.64	<2.2e-16	0.87	<2.2e-16	NA	NA	NA	NA	NA	NA	0.69	<2.2e-16	0.79	<2.2e-16	0.78	<2.2e-16	NA	NA	0.73	<2.2e-16	0.81	<2.2e-16	0.05	7e-05	0.69	<2.2e-16	0.02	0.2	0.79	<2.2e-16	0.6	<2.2e-16	0.88	<2.2e-16	0.75	<2.2e-16	0.78	<2.2e-16	0.56	<2.2e-16
SMC3	K562	TSS	lincRNA	0.7	<2.2e-16	0.65	<2.2e-16	NA	NA	0.51	<2.2e-16	0.72	<2.2e-16	NA	NA	NA	NA	NA	NA	0.52	<2.2e-16	0.66	<2.2e-16	0.69	<2.2e-16	NA	NA	0.64	<2.2e-16	0.72	<2.2e-16	0.11	<2.2e-16	0.56	<2.2e-16	0.07	8e-09	0.66	<2.2e-16	0.44	<2.2e-16	0.73	<2.2e-16	0.57	<2.2e-16	0.65	<2.2e-16	0.46	<2.2e-16
SP1	K562	TSS	lincRNA	0.58	<2.2e-16	0.6	<2.2e-16	NA	NA	0.54	<2.2e-16	0.52	<2.2e-16	NA	NA	NA	NA	NA	NA	0.62	<2.2e-16	0.43	<2.2e-16	0.63	<2.2e-16	NA	NA	0.38	<2.2e-16	0.48	<2.2e-16	0.04	0.0006	0.64	<2.2e-16	0.02	0.05	0.66	<2.2e-16	0.53	<2.2e-16	0.63	<2.2e-16	0.62	<2.2e-16	0.66	<2.2e-16	0.44	<2.2e-16
SP2	K562	TSS	lincRNA	0.47	<2.2e-16	0.52	<2.2e-16	NA	NA	0.38	<2.2e-16	0.48	<2.2e-16	NA	NA	NA	NA	NA	NA	0.4	<2.2e-16	0.45	<2.2e-16	0.49	<2.2e-16	NA	NA	0.42	<2.2e-16	0.5	<2.2e-16	0.12	<2.2e-16	0.46	<2.2e-16	0.08	6e-12	0.47	<2.2e-16	0.36	<2.2e-16	0.51	<2.2e-16	0.48	<2.2e-16	0.54	<2.2e-16	0.4	<2.2e-16
SPI1-PU1	K562	TSS	lincRNA	0.2	<2.2e-16	0.19	<2.2e-16	NA	NA	0.25	<2.2e-16	0.11	<2.2e-16	NA	NA	NA	NA	NA	NA	0.28	<2.2e-16	0.11	<2.2e-16	0.21	<2.2e-16	NA	NA	0.06	9e-07	0.12	<2.2e-16	0.18	<2.2e-16	0.46	<2.2e-16	0.19	<2.2e-16	0.17	<2.2e-16	0.41	<2.2e-16	0.17	<2.2e-16	0.4	<2.2e-16	0.21	<2.2e-16	0.5	<2.2e-16
SRF	K562	TSS	lincRNA	0.68	<2.2e-16	0.74	<2.2e-16	NA	NA	0.6	<2.2e-16	0.64	<2.2e-16	NA	NA	NA	NA	NA	NA	0.64	<2.2e-16	0.57	<2.2e-16	0.67	<2.2e-16	NA	NA	0.52	<2.2e-16	0.62	<2.2e-16	0.04	3	0.67	<2.2e-16	0.02	0.3	0.66	<2.2e-16	0.57	<2.2e-16	0.72	<2.2e-16	0.63	<2.2e-16	0.65	<2.2e-16	0.47	<2.2e-16
STAT1	K562	TSS	lincRNA	0.87	<2.2e-16	0.81	<2.2e-16	NA	NA	0.63	<2.2e-16	0.84	<2.2e-16	NA	NA	NA	NA	NA	NA	0.63	<2.2e-16	0.83	<2.2e-16	0.78	<2.2e-16	NA	NA	0.76	<2.2e-16	0.86	<2.2e-16	0.07	2e-09	0.68	<2.2e-16	0.03	7	0.75	<2.2e-16	0.58	<2.2e-16	0.86	<2.2e-16	0.71	<2.2e-16	0.75	<2.2e-16	0.53	<2.2e-16
STAT2	K562	TSS	lincRNA	0.84	<2.2e-16	0.81	<2.2e-16	NA	NA	0.65	<2.2e-16	0.82	<2.2e-16	NA	NA	NA	NA	NA	NA	0.66	<2.2e-16	0.77	<2.2e-16	0.81	<2.2e-16	NA	NA	0.71	<2.2e-16	0.83	<2.2e-16	0.08	5e-11	0.72	<2.2e-16	0.04	2	0.8	<2.2e-16	0.59	<2.2e-16	0.88	<2.2e-16	0.75	<2.2e-16	0.78	<2.2e-16	0.56	<2.2e-16
STAT5A	K562	TSS	lincRNA	0.56	<2.2e-16	0.49	<2.2e-16	NA	NA	0.53	<2.2e-16	0.44	<2.2e-16	NA	NA	NA	NA	NA	NA	0.51	<2.2e-16	0.42	<2.2e-16	0.45	<2.2e-16	NA	NA	0.35	<2.2e-16	0.43	<2.2e-16	0.12	<2.2e-16	0.65	<2.2e-16	0.1	<2.2e-16	0.45	<2.2e-16	0.65	<2.2e-16	0.54	<2.2e-16	0.55	<2.2e-16	0.42	<2.2e-16	0.55	<2.2e-16
SUZ12	K562	TSS	lincRNA	0.12	<2.2e-16	0.16	<2.2e-16	NA	NA	0.11	<2.2e-16	0.15	<2.2e-16	NA	NA	NA	NA	NA	NA	0.15	<2.2e-16	0.11	<2.2e-16	0.2	<2.2e-16	NA	NA	0.13	<2.2e-16	0.16	<2.2e-16	0.68	<2.2e-16	0.21	<2.2e-16	0.65	<2.2e-16	0.17	<2.2e-16	0.16	<2.2e-16	0.18	<2.2e-16	0.31	<2.2e-16	0.18	<2.2e-16	0.39	<2.2e-16
TAF1	K562	TSS	lincRNA	0.65	<2.2e-16	0.64	<2.2e-16	NA	NA	0.56	<2.2e-16	0.6	<2.2e-16	NA	NA	NA	NA	NA	NA	0.78	<2.2e-16	0.48	<2.2e-16	0.69	<2.2e-16	NA	NA	0.42	<2.2e-16	0.54	<2.2e-16	0.01	0.6	0.7	<2.2e-16	-0.01	0.4	0.76	<2.2e-16	0.58	<2.2e-16	0.72	<2.2e-16	0.81	<2.2e-16	0.71	<2.2e-16	0.45	<2.2e-16
TAF7	K562	TSS	lincRNA	0.64	<2.2e-16	0.58	<2.2e-16	NA	NA	0.56	<2.2e-16	0.6	<2.2e-16	NA	NA	NA	NA	NA	NA	0.77	<2.2e-16	0.5	<2.2e-16	0.6	<2.2e-16	NA	NA	0.45	<2.2e-16	0.54	<2.2e-16	0.04	2	0.67	<2.2e-16	0.02	0.2	0.64	<2.2e-16	0.62	<2.2e-16	0.68	<2.2e-16	0.69	<2.2e-16	0.63	<2.2e-16	0.47	<2.2e-16
TAL1	K562	TSS	lincRNA	0.76	<2.2e-16	0.67	<2.2e-16	NA	NA	0.58	<2.2e-16	0.68	<2.2e-16	NA	NA	NA	NA	NA	NA	0.59	<2.2e-16	0.61	<2.2e-16	0.65	<2.2e-16	NA	NA	0.55	<2.2e-16	0.64	<2.2e-16	0.02	0.2	0.61	<2.2e-16	-0.01	0.7	0.68	<2.2e-16	0.6	<2.2e-16	0.81	<2.2e-16	0.61	<2.2e-16	0.63	<2.2e-16	0.47	<2.2e-16
TBL1XR1-TBLR1	K562	TSS	lincRNA	0.87	<2.2e-16	0.82	<2.2e-16	NA	NA	0.64	<2.2e-16	0.89	<2.2e-16	NA	NA	NA	NA	NA	NA	0.69	<2.2e-16	0.81	<2.2e-16	0.84	<2.2e-16	NA	NA	0.77	<2.2e-16	0.86	<2.2e-16	0.1	3e-16	0.72	<2.2e-16	0.06	6e-06	0.85	<2.2e-16	0.57	<2.2e-16	0.92	<2.2e-16	0.78	<2.2e-16	0.83	<2.2e-16	0.57	<2.2e-16
TBP	K562	TSS	lincRNA	0.73	<2.2e-16	0.69	<2.2e-16	NA	NA	0.66	<2.2e-16	0.69	<2.2e-16	NA	NA	NA	NA	NA	NA	0.78	<2.2e-16	0.59	<2.2e-16	0.73	<2.2e-16	NA	NA	0.53	<2.2e-16	0.63	<2.2e-16	0.03	0.01	0.72	<2.2e-16	0.01	0.6	0.77	<2.2e-16	0.61	<2.2e-16	0.77	<2.2e-16	0.79	<2.2e-16	0.77	<2.2e-16	0.49	<2.2e-16
TEAD4	K562	TSS	lincRNA	0.76	<2.2e-16	0.69	<2.2e-16	NA	NA	0.71	<2.2e-16	0.64	<2.2e-16	NA	NA	NA	NA	NA	NA	0.68	<2.2e-16	0.59	<2.2e-16	0.7	<2.2e-16	NA	NA	0.51	<2.2e-16	0.62	<2.2e-16	0.01	0.3	0.73	<2.2e-16	0	0.9	0.72	<2.2e-16	0.7	<2.2e-16	0.8	<2.2e-16	0.66	<2.2e-16	0.64	<2.2e-16	0.52	<2.2e-16
THAP1	K562	TSS	lincRNA	0.57	<2.2e-16	0.63	<2.2e-16	NA	NA	0.54	<2.2e-16	0.54	<2.2e-16	NA	NA	NA	NA	NA	NA	0.65	<2.2e-16	0.48	<2.2e-16	0.64	<2.2e-16	NA	NA	0.44	<2.2e-16	0.53	<2.2e-16	0.07	8e-09	0.64	<2.2e-16	0.05	7e-05	0.65	<2.2e-16	0.49	<2.2e-16	0.64	<2.2e-16	0.65	<2.2e-16	0.64	<2.2e-16	0.46	<2.2e-16
TR4-NR2C2	K562	TSS	lincRNA	0.55	<2.2e-16	0.56	<2.2e-16	NA	NA	0.31	<2.2e-16	0.67	<2.2e-16	NA	NA	NA	NA	NA	NA	0.28	<2.2e-16	0.7	<2.2e-16	0.48	<2.2e-16	NA	NA	0.7	<2.2e-16	0.72	<2.2e-16	0.09	3e-14	0.3	<2.2e-16	0.05	0.0002	0.42	<2.2e-16	0.24	<2.2e-16	0.55	<2.2e-16	0.37	<2.2e-16	0.49	<2.2e-16	0.28	<2.2e-16
TRIM28	K562	TSS	lincRNA	0.79	<2.2e-16	0.71	<2.2e-16	NA	NA	0.67	<2.2e-16	0.69	<2.2e-16	NA	NA	NA	NA	NA	NA	0.72	<2.2e-16	0.63	<2.2e-16	0.72	<2.2e-16	NA	NA	0.55	<2.2e-16	0.68	<2.2e-16	0.13	<2.2e-16	0.89	<2.2e-16	0.11	<2.2e-16	0.74	<2.2e-16	0.77	<2.2e-16	0.8	<2.2e-16	0.83	<2.2e-16	0.7	<2.2e-16	0.72	<2.2e-16
UBTF	K562	TSS	lincRNA	0.76	<2.2e-16	0.69	<2.2e-16	NA	NA	0.58	<2.2e-16	0.72	<2.2e-16	NA	NA	NA	NA	NA	NA	0.71	<2.2e-16	0.61	<2.2e-16	0.79	<2.2e-16	NA	NA	0.58	<2.2e-16	0.68	<2.2e-16	0.09	2e-14	0.7	<2.2e-16	0.07	3e-08	0.89	<2.2e-16	0.54	<2.2e-16	0.82	<2.2e-16	0.83	<2.2e-16	0.74	<2.2e-16	0.57	<2.2e-16
USF1	K562	TSS	lincRNA	0.44	<2.2e-16	0.45	<2.2e-16	NA	NA	0.37	<2.2e-16	0.42	<2.2e-16	NA	NA	NA	NA	NA	NA	0.42	<2.2e-16	0.37	<2.2e-16	0.63	<2.2e-16	NA	NA	0.33	<2.2e-16	0.41	<2.2e-16	0.03	0.02	0.49	<2.2e-16	0.01	0.5	0.49	<2.2e-16	0.37	<2.2e-16	0.48	<2.2e-16	0.47	<2.2e-16	0.47	<2.2e-16	0.35	<2.2e-16
USF2	K562	TSS	lincRNA	0.79	<2.2e-16	0.76	<2.2e-16	NA	NA	0.52	<2.2e-16	0.86	<2.2e-16	NA	NA	NA	NA	NA	NA	0.54	<2.2e-16	0.85	<2.2e-16	0.75	<2.2e-16	NA	NA	0.81	<2.2e-16	0.88	<2.2e-16	0.1	<2.2e-16	0.57	<2.2e-16	0.06	4e-06	0.67	<2.2e-16	0.46	<2.2e-16	0.79	<2.2e-16	0.63	<2.2e-16	0.72	<2.2e-16	0.46	<2.2e-16
WHSC1-NSD2	K562	TSS	lincRNA	0.62	<2.2e-16	0.6	<2.2e-16	NA	NA	0.49	<2.2e-16	0.62	<2.2e-16	NA	NA	NA	NA	NA	NA	0.5	<2.2e-16	0.59	<2.2e-16	0.65	<2.2e-16	NA	NA	0.57	<2.2e-16	0.66	<2.2e-16	0.18	<2.2e-16	0.67	<2.2e-16	0.15	<2.2e-16	0.64	<2.2e-16	0.49	<2.2e-16	0.71	<2.2e-16	0.74	<2.2e-16	0.61	<2.2e-16	0.77	<2.2e-16
XRCC4	K562	TSS	lincRNA	0.75	<2.2e-16	0.71	<2.2e-16	NA	NA	0.49	<2.2e-16	0.8	<2.2e-16	NA	NA	NA	NA	NA	NA	0.49	<2.2e-16	0.81	<2.2e-16	0.66	<2.2e-16	NA	NA	0.77	<2.2e-16	0.84	<2.2e-16	0.13	<2.2e-16	0.53	<2.2e-16	0.08	9e-11	0.61	<2.2e-16	0.44	<2.2e-16	0.74	<2.2e-16	0.59	<2.2e-16	0.66	<2.2e-16	0.46	<2.2e-16
YY1	K562	TSS	lincRNA	0.59	<2.2e-16	0.6	<2.2e-16	NA	NA	0.51	<2.2e-16	0.54	<2.2e-16	NA	NA	NA	NA	NA	NA	0.67	<2.2e-16	0.44	<2.2e-16	0.63	<2.2e-16	NA	NA	0.39	<2.2e-16	0.5	<2.2e-16	0.03	0.05	0.66	<2.2e-16	0.01	0.6	0.68	<2.2e-16	0.5	<2.2e-16	0.65	<2.2e-16	0.72	<2.2e-16	0.63	<2.2e-16	0.44	<2.2e-16
ZBTB33	K562	TSS	lincRNA	0.15	<2.2e-16	0.15	<2.2e-16	NA	NA	0.2	<2.2e-16	0.09	2e-13	NA	NA	NA	NA	NA	NA	0.28	<2.2e-16	0.07	3e-09	0.17	<2.2e-16	NA	NA	0.04	4	0.08	1e-11	0.17	<2.2e-16	0.43	<2.2e-16	0.17	<2.2e-16	0.15	<2.2e-16	0.36	<2.2e-16	0.13	<2.2e-16	0.37	<2.2e-16	0.38	<2.2e-16	0.43	<2.2e-16
ZBTB7A	K562	TSS	lincRNA	0.56	<2.2e-16	0.52	<2.2e-16	NA	NA	0.48	<2.2e-16	0.54	<2.2e-16	NA	NA	NA	NA	NA	NA	0.57	<2.2e-16	0.42	<2.2e-16	0.7	<2.2e-16	NA	NA	0.4	<2.2e-16	0.5	<2.2e-16	0.04	0.0006	0.63	<2.2e-16	0.02	0.09	0.82	<2.2e-16	0.41	<2.2e-16	0.7	<2.2e-16	0.69	<2.2e-16	0.63	<2.2e-16	0.57	<2.2e-16
ZC3H11A	K562	TSS	lincRNA	0.9	<2.2e-16	0.84	<2.2e-16	NA	NA	0.62	<2.2e-16	0.91	<2.2e-16	NA	NA	NA	NA	NA	NA	0.63	<2.2e-16	0.85	<2.2e-16	0.81	<2.2e-16	NA	NA	0.8	<2.2e-16	0.88	<2.2e-16	0.09	8e-13	0.67	<2.2e-16	0.05	0.0003	0.8	<2.2e-16	0.55	<2.2e-16	0.89	<2.2e-16	0.72	<2.2e-16	0.78	<2.2e-16	0.55	<2.2e-16
ZMIZ1	K562	TSS	lincRNA	0.91	<2.2e-16	0.84	<2.2e-16	NA	NA	0.68	<2.2e-16	0.88	<2.2e-16	NA	NA	NA	NA	NA	NA	0.72	<2.2e-16	0.8	<2.2e-16	0.84	<2.2e-16	NA	NA	0.74	<2.2e-16	0.85	<2.2e-16	0.07	9e-09	0.75	<2.2e-16	0.03	9	0.87	<2.2e-16	0.64	<2.2e-16	0.94	<2.2e-16	0.79	<2.2e-16	0.82	<2.2e-16	0.59	<2.2e-16
ZNF143	K562	TSS	lincRNA	0.76	<2.2e-16	0.74	<2.2e-16	NA	NA	0.58	<2.2e-16	0.75	<2.2e-16	NA	NA	NA	NA	NA	NA	0.62	<2.2e-16	0.68	<2.2e-16	0.74	<2.2e-16	NA	NA	0.63	<2.2e-16	0.73	<2.2e-16	0.07	4e-08	0.66	<2.2e-16	0.03	0.03	0.72	<2.2e-16	0.52	<2.2e-16	0.78	<2.2e-16	0.67	<2.2e-16	0.73	<2.2e-16	0.51	<2.2e-16
ZNF263	K562	TSS	lincRNA	0.49	<2.2e-16	0.54	<2.2e-16	NA	NA	0.39	<2.2e-16	0.55	<2.2e-16	NA	NA	NA	NA	NA	NA	0.42	<2.2e-16	0.5	<2.2e-16	0.64	<2.2e-16	NA	NA	0.51	<2.2e-16	0.6	<2.2e-16	0.18	<2.2e-16	0.5	<2.2e-16	0.14	<2.2e-16	0.64	<2.2e-16	0.31	<2.2e-16	0.67	<2.2e-16	0.55	<2.2e-16	0.6	<2.2e-16	0.5	<2.2e-16
ZNF274	K562	TSS	lincRNA	0.38	<2.2e-16	0.4	<2.2e-16	NA	NA	0.14	<2.2e-16	0.52	<2.2e-16	NA	NA	NA	NA	NA	NA	0.1	<2.2e-16	0.63	<2.2e-16	0.27	<2.2e-16	NA	NA	0.63	<2.2e-16	0.61	<2.2e-16	0.07	5e-08	0.09	2e-12	0.02	0.09	0.17	<2.2e-16	0.08	5e-10	0.32	<2.2e-16	0.15	<2.2e-16	0.27	<2.2e-16	0.09	3e-13
ZNF384	K562	TSS	lincRNA	0.83	<2.2e-16	0.75	<2.2e-16	NA	NA	0.63	<2.2e-16	0.76	<2.2e-16	NA	NA	NA	NA	NA	NA	0.62	<2.2e-16	0.73	<2.2e-16	0.75	<2.2e-16	NA	NA	0.66	<2.2e-16	0.77	<2.2e-16	0.07	6e-09	0.68	<2.2e-16	0.04	2	0.75	<2.2e-16	0.58	<2.2e-16	0.82	<2.2e-16	0.7	<2.2e-16	0.73	<2.2e-16	0.55	<2.2e-16
DNASE HYPERSENSITIVITY	K562	TSS	lincRNA	0.69	<2.2e-16	0.7	<2.2e-16	NA	NA	0.57	<2.2e-16	0.67	<2.2e-16	NA	NA	NA	NA	NA	NA	0.64	<2.2e-16	0.55	<2.2e-16	0.8	<2.2e-16	NA	NA	0.52	<2.2e-16	0.64	<2.2e-16	0.12	<2.2e-16	0.74	<2.2e-16	0.09	2e-12	0.86	<2.2e-16	0.53	<2.2e-16	0.81	<2.2e-16	0.78	<2.2e-16	0.76	<2.2e-16	0.61	<2.2e-16
FOS (AND EGFP-FOS)	K562	TSS	lincRNA	0.73	<2.2e-16	0.76	<2.2e-16	NA	NA	0.67	<2.2e-16	0.69	<2.2e-16	NA	NA	NA	NA	NA	NA	0.56	<2.2e-16	0.64	<2.2e-16	0.73	<2.2e-16	NA	NA	0.6	<2.2e-16	0.69	<2.2e-16	0.05	2e-05	0.66	<2.2e-16	0.02	0.06	0.7	<2.2e-16	0.55	<2.2e-16	0.75	<2.2e-16	0.64	<2.2e-16	0.72	<2.2e-16	0.49	<2.2e-16
JUND (AND EGFP-JUND)	K562	TSS	lincRNA	0.83	<2.2e-16	0.83	<2.2e-16	NA	NA	0.83	<2.2e-16	0.76	<2.2e-16	NA	NA	NA	NA	NA	NA	0.65	<2.2e-16	0.68	<2.2e-16	0.82	<2.2e-16	NA	NA	0.62	<2.2e-16	0.74	<2.2e-16	0.06	6e-06	0.74	<2.2e-16	0.03	0.04	0.8	<2.2e-16	0.66	<2.2e-16	0.85	<2.2e-16	0.72	<2.2e-16	0.71	<2.2e-16	0.58	<2.2e-16
GATA2 (AND EGFP-GATA2)	K562	TSS	lincRNA	0.33	<2.2e-16	0.28	<2.2e-16	NA	NA	0.37	<2.2e-16	0.19	<2.2e-16	NA	NA	NA	NA	NA	NA	0.32	<2.2e-16	0.2	<2.2e-16	0.26	<2.2e-16	NA	NA	0.14	<2.2e-16	0.21	<2.2e-16	0.13	<2.2e-16	0.51	<2.2e-16	0.14	<2.2e-16	0.27	<2.2e-16	0.56	<2.2e-16	0.35	<2.2e-16	0.4	<2.2e-16	0.21	<2.2e-16	0.53	<2.2e-16
ARID3A	K562	Transcript	lincRNA	NA	NA	0.82	<2.2e-16	NA	NA	0.66	<2.2e-16	0.85	<2.2e-16	NA	NA	NA	NA	NA	NA	0.57	<2.2e-16	0.77	<2.2e-16	0.79	<2.2e-16	NA	NA	0.68	<2.2e-16	0.79	<2.2e-16	0.07	3e-08	0.63	<2.2e-16	0.02	0.07	0.74	<2.2e-16	0.59	<2.2e-16	0.83	<2.2e-16	0.67	<2.2e-16	0.77	<2.2e-16	0.47	<2.2e-16
ATF1	K562	Transcript	lincRNA	0.82	<2.2e-16	NA	NA	NA	NA	0.65	<2.2e-16	0.79	<2.2e-16	NA	NA	NA	NA	NA	NA	0.54	<2.2e-16	0.73	<2.2e-16	0.81	<2.2e-16	NA	NA	0.68	<2.2e-16	0.78	<2.2e-16	0.11	<2.2e-16	0.61	<2.2e-16	0.06	4e-06	0.74	<2.2e-16	0.55	<2.2e-16	0.82	<2.2e-16	0.65	<2.2e-16	0.76	<2.2e-16	0.45	<2.2e-16
ATF3	K562	Transcript	lincRNA	0.66	<2.2e-16	0.65	<2.2e-16	NA	NA	NA	NA	0.55	<2.2e-16	NA	NA	NA	NA	NA	NA	0.57	<2.2e-16	0.48	<2.2e-16	0.66	<2.2e-16	NA	NA	0.43	<2.2e-16	0.52	<2.2e-16	0.05	0.0002	0.66	<2.2e-16	0.01	0.5	0.64	<2.2e-16	0.68	<2.2e-16	0.67	<2.2e-16	0.55	<2.2e-16	0.62	<2.2e-16	0.41	<2.2e-16
BACH1	K562	Transcript	lincRNA	0.85	<2.2e-16	0.79	<2.2e-16	NA	NA	0.55	<2.2e-16	NA	NA	NA	NA	NA	NA	NA	NA	0.52	<2.2e-16	0.79	<2.2e-16	0.76	<2.2e-16	NA	NA	0.73	<2.2e-16	0.8	<2.2e-16	0.09	4e-12	0.53	<2.2e-16	0.03	6	0.69	<2.2e-16	0.47	<2.2e-16	0.8	<2.2e-16	0.62	<2.2e-16	0.77	<2.2e-16	0.42	<2.2e-16
BCLAF1	K562	Transcript	lincRNA	0.57	<2.2e-16	0.54	<2.2e-16	NA	NA	0.57	<2.2e-16	0.52	<2.2e-16	NA	NA	NA	NA	NA	NA	NA	NA	0.41	<2.2e-16	0.61	<2.2e-16	NA	NA	0.34	<2.2e-16	0.46	<2.2e-16	0.04	0.0009	0.66	<2.2e-16	0.01	0.7	0.64	<2.2e-16	0.55	<2.2e-16	0.63	<2.2e-16	0.63	<2.2e-16	0.66	<2.2e-16	0.4	<2.2e-16
BDP1	K562	Transcript	lincRNA	0.77	<2.2e-16	0.73	<2.2e-16	NA	NA	0.48	<2.2e-16	0.79	<2.2e-16	NA	NA	NA	NA	NA	NA	0.41	<2.2e-16	NA	NA	0.66	<2.2e-16	NA	NA	0.77	<2.2e-16	0.84	<2.2e-16	0.09	2e-12	0.43	<2.2e-16	0.06	6e-06	0.55	<2.2e-16	0.41	<2.2e-16	0.69	<2.2e-16	0.51	<2.2e-16	0.65	<2.2e-16	0.38	<2.2e-16
BHLHE40	K562	Transcript	lincRNA	0.79	<2.2e-16	0.81	<2.2e-16	NA	NA	0.66	<2.2e-16	0.76	<2.2e-16	NA	NA	NA	NA	NA	NA	0.61	<2.2e-16	0.66	<2.2e-16	NA	NA	NA	NA	0.61	<2.2e-16	0.74	<2.2e-16	0.11	<2.2e-16	0.71	<2.2e-16	0.06	9e-07	0.84	<2.2e-16	0.59	<2.2e-16	0.86	<2.2e-16	0.73	<2.2e-16	0.83	<2.2e-16	0.52	<2.2e-16
BRF1	K562	Transcript	lincRNA	0.68	<2.2e-16	0.68	<2.2e-16	NA	NA	0.43	<2.2e-16	0.73	<2.2e-16	NA	NA	NA	NA	NA	NA	0.34	<2.2e-16	0.77	<2.2e-16	0.61	<2.2e-16	NA	NA	NA	NA	0.76	<2.2e-16	0.1	5e-16	0.37	<2.2e-16	0.05	8e-06	0.51	<2.2e-16	0.34	<2.2e-16	0.64	<2.2e-16	0.46	<2.2e-16	0.6	<2.2e-16	0.33	<2.2e-16
BRF2	K562	Transcript	lincRNA	0.79	<2.2e-16	0.78	<2.2e-16	NA	NA	0.52	<2.2e-16	0.8	<2.2e-16	NA	NA	NA	NA	NA	NA	0.46	<2.2e-16	0.84	<2.2e-16	0.74	<2.2e-16	NA	NA	0.76	<2.2e-16	NA	NA	0.11	<2.2e-16	0.51	<2.2e-16	0.05	2e-05	0.64	<2.2e-16	0.44	<2.2e-16	0.77	<2.2e-16	0.59	<2.2e-16	0.72	<2.2e-16	0.43	<2.2e-16
CBX2	K562	Transcript	lincRNA	0.07	3e-08	0.11	<2.2e-16	NA	NA	0.05	0.0002	0.09	4e-12	NA	NA	NA	NA	NA	NA	0.04	0.0009	0.09	2e-12	0.11	<2.2e-16	NA	NA	0.1	5e-16	0.11	<2.2e-16	NA	NA	0.08	9e-10	0.89	<2.2e-16	0.05	0.0003	0.07	3e-09	0.08	5e-11	0.19	<2.2e-16	0.1	5e-15	0.26	<2.2e-16
CBX3	K562	Transcript	lincRNA	0.63	<2.2e-16	0.61	<2.2e-16	NA	NA	0.66	<2.2e-16	0.53	<2.2e-16	NA	NA	NA	NA	NA	NA	0.66	<2.2e-16	0.43	<2.2e-16	0.71	<2.2e-16	NA	NA	0.37	<2.2e-16	0.51	<2.2e-16	0.08	9e-10	NA	NA	0.03	0.03	0.68	<2.2e-16	0.72	<2.2e-16	0.7	<2.2e-16	0.73	<2.2e-16	0.69	<2.2e-16	0.62	<2.2e-16
CBX8	K562	Transcript	lincRNA	0.02	0.07	0.06	4e-06	NA	NA	0.01	0.5	0.03	6	NA	NA	NA	NA	NA	NA	0.01	0.7	0.06	6e-06	0.06	9e-07	NA	NA	0.05	8e-06	0.05	2e-05	0.89	<2.2e-16	0.03	0.03	NA	NA	0	0.8	0.04	0.0004	0.02	0.06	0.14	<2.2e-16	0.04	3	0.25	<2.2e-16
CCNT2	K562	Transcript	lincRNA	0.74	<2.2e-16	0.74	<2.2e-16	NA	NA	0.64	<2.2e-16	0.69	<2.2e-16	NA	NA	NA	NA	NA	NA	0.64	<2.2e-16	0.55	<2.2e-16	0.84	<2.2e-16	NA	NA	0.51	<2.2e-16	0.64	<2.2e-16	0.05	0.0003	0.68	<2.2e-16	0	0.8	NA	NA	0.57	<2.2e-16	0.85	<2.2e-16	0.73	<2.2e-16	0.81	<2.2e-16	0.48	<2.2e-16
CEBPB	K562	Transcript	lincRNA	0.59	<2.2e-16	0.55	<2.2e-16	NA	NA	0.68	<2.2e-16	0.47	<2.2e-16	NA	NA	NA	NA	NA	NA	0.55	<2.2e-16	0.41	<2.2e-16	0.59	<2.2e-16	NA	NA	0.34	<2.2e-16	0.44	<2.2e-16	0.07	3e-09	0.72	<2.2e-16	0.04	0.0004	0.57	<2.2e-16	NA	NA	0.62	<2.2e-16	0.62	<2.2e-16	0.55	<2.2e-16	0.46	<2.2e-16
CEBPD	K562	Transcript	lincRNA	0.83	<2.2e-16	0.82	<2.2e-16	NA	NA	0.67	<2.2e-16	0.8	<2.2e-16	NA	NA	NA	NA	NA	NA	0.63	<2.2e-16	0.69	<2.2e-16	0.86	<2.2e-16	NA	NA	0.64	<2.2e-16	0.77	<2.2e-16	0.08	5e-11	0.7	<2.2e-16	0.02	0.06	0.85	<2.2e-16	0.62	<2.2e-16	NA	NA	0.71	<2.2e-16	0.84	<2.2e-16	0.5	<2.2e-16
CHD1	K562	Transcript	lincRNA	0.67	<2.2e-16	0.65	<2.2e-16	NA	NA	0.55	<2.2e-16	0.62	<2.2e-16	NA	NA	NA	NA	NA	NA	0.63	<2.2e-16	0.51	<2.2e-16	0.73	<2.2e-16	NA	NA	0.46	<2.2e-16	0.59	<2.2e-16	0.19	<2.2e-16	0.73	<2.2e-16	0.14	<2.2e-16	0.73	<2.2e-16	0.62	<2.2e-16	0.71	<2.2e-16	NA	NA	0.74	<2.2e-16	0.65	<2.2e-16
CHD2	K562	Transcript	lincRNA	0.77	<2.2e-16	0.76	<2.2e-16	NA	NA	0.62	<2.2e-16	0.77	<2.2e-16	NA	NA	NA	NA	NA	NA	0.66	<2.2e-16	0.65	<2.2e-16	0.83	<2.2e-16	NA	NA	0.6	<2.2e-16	0.72	<2.2e-16	0.1	5e-15	0.69	<2.2e-16	0.04	3	0.81	<2.2e-16	0.55	<2.2e-16	0.84	<2.2e-16	0.74	<2.2e-16	NA	NA	0.49	<2.2e-16
CHD4	K562	Transcript	lincRNA	0.47	<2.2e-16	0.45	<2.2e-16	NA	NA	0.41	<2.2e-16	0.42	<2.2e-16	NA	NA	NA	NA	NA	NA	0.4	<2.2e-16	0.38	<2.2e-16	0.52	<2.2e-16	NA	NA	0.33	<2.2e-16	0.43	<2.2e-16	0.26	<2.2e-16	0.62	<2.2e-16	0.25	<2.2e-16	0.48	<2.2e-16	0.46	<2.2e-16	0.5	<2.2e-16	0.65	<2.2e-16	0.49	<2.2e-16	NA	NA
CHD7	K562	Transcript	lincRNA	0.56	<2.2e-16	0.59	<2.2e-16	NA	NA	0.47	<2.2e-16	0.56	<2.2e-16	NA	NA	NA	NA	NA	NA	0.5	<2.2e-16	0.5	<2.2e-16	0.64	<2.2e-16	NA	NA	0.47	<2.2e-16	0.57	<2.2e-16	0.28	<2.2e-16	0.63	<2.2e-16	0.23	<2.2e-16	0.62	<2.2e-16	0.51	<2.2e-16	0.65	<2.2e-16	0.77	<2.2e-16	0.68	<2.2e-16	0.67	<2.2e-16
COREST-RCOR1	K562	Transcript	lincRNA	0.86	<2.2e-16	0.85	<2.2e-16	NA	NA	0.64	<2.2e-16	0.85	<2.2e-16	NA	NA	NA	NA	NA	NA	0.58	<2.2e-16	0.76	<2.2e-16	0.87	<2.2e-16	NA	NA	0.72	<2.2e-16	0.82	<2.2e-16	0.12	<2.2e-16	0.68	<2.2e-16	0.06	4e-07	0.81	<2.2e-16	0.57	<2.2e-16	0.9	<2.2e-16	0.71	<2.2e-16	0.85	<2.2e-16	0.53	<2.2e-16
CREB1	K562	Transcript	lincRNA	0.7	<2.2e-16	0.73	<2.2e-16	NA	NA	0.65	<2.2e-16	0.63	<2.2e-16	NA	NA	NA	NA	NA	NA	0.66	<2.2e-16	0.52	<2.2e-16	0.74	<2.2e-16	NA	NA	0.45	<2.2e-16	0.58	<2.2e-16	0.13	<2.2e-16	0.8	<2.2e-16	0.09	1e-12	0.74	<2.2e-16	0.69	<2.2e-16	0.75	<2.2e-16	0.79	<2.2e-16	0.74	<2.2e-16	0.6	<2.2e-16
CREBBP	K562	Transcript	lincRNA	0.4	<2.2e-16	0.45	<2.2e-16	NA	NA	0.31	<2.2e-16	0.44	<2.2e-16	NA	NA	NA	NA	NA	NA	0.28	<2.2e-16	0.42	<2.2e-16	0.39	<2.2e-16	NA	NA	0.4	<2.2e-16	0.43	<2.2e-16	0.27	<2.2e-16	0.36	<2.2e-16	0.23	<2.2e-16	0.34	<2.2e-16	0.31	<2.2e-16	0.39	<2.2e-16	0.5	<2.2e-16	0.4	<2.2e-16	0.52	<2.2e-16
CTCF	K562	Transcript	lincRNA	0.42	<2.2e-16	0.38	<2.2e-16	NA	NA	0.33	<2.2e-16	0.39	<2.2e-16	NA	NA	NA	NA	NA	NA	0.28	<2.2e-16	0.35	<2.2e-16	0.45	<2.2e-16	NA	NA	0.33	<2.2e-16	0.4	<2.2e-16	0.09	2e-14	0.39	<2.2e-16	0.06	6e-06	0.37	<2.2e-16	0.31	<2.2e-16	0.42	<2.2e-16	0.35	<2.2e-16	0.4	<2.2e-16	0.31	<2.2e-16
CTCFL	K562	Transcript	lincRNA	0.52	<2.2e-16	0.55	<2.2e-16	NA	NA	0.43	<2.2e-16	0.51	<2.2e-16	NA	NA	NA	NA	NA	NA	0.47	<2.2e-16	0.45	<2.2e-16	0.61	<2.2e-16	NA	NA	0.43	<2.2e-16	0.53	<2.2e-16	0.12	<2.2e-16	0.5	<2.2e-16	0.07	3e-08	0.6	<2.2e-16	0.38	<2.2e-16	0.6	<2.2e-16	0.54	<2.2e-16	0.59	<2.2e-16	0.39	<2.2e-16
CUX1	K562	Transcript	lincRNA	0.91	<2.2e-16	0.85	<2.2e-16	NA	NA	0.61	<2.2e-16	0.88	<2.2e-16	NA	NA	NA	NA	NA	NA	0.53	<2.2e-16	0.81	<2.2e-16	0.8	<2.2e-16	NA	NA	0.75	<2.2e-16	0.83	<2.2e-16	0.09	5e-12	0.57	<2.2e-16	0.04	2	0.72	<2.2e-16	0.53	<2.2e-16	0.83	<2.2e-16	0.64	<2.2e-16	0.77	<2.2e-16	0.46	<2.2e-16
E2F4	K562	Transcript	lincRNA	0.68	<2.2e-16	0.74	<2.2e-16	NA	NA	0.62	<2.2e-16	0.67	<2.2e-16	NA	NA	NA	NA	NA	NA	0.63	<2.2e-16	0.56	<2.2e-16	0.85	<2.2e-16	NA	NA	0.53	<2.2e-16	0.67	<2.2e-16	0.13	<2.2e-16	0.71	<2.2e-16	0.07	1e-08	0.84	<2.2e-16	0.54	<2.2e-16	0.82	<2.2e-16	0.73	<2.2e-16	0.83	<2.2e-16	0.51	<2.2e-16
E2F6	K562	Transcript	lincRNA	0.61	<2.2e-16	0.64	<2.2e-16	NA	NA	0.58	<2.2e-16	0.58	<2.2e-16	NA	NA	NA	NA	NA	NA	0.58	<2.2e-16	0.46	<2.2e-16	0.8	<2.2e-16	NA	NA	0.42	<2.2e-16	0.56	<2.2e-16	0.09	8e-13	0.74	<2.2e-16	0.05	0.0003	0.78	<2.2e-16	0.53	<2.2e-16	0.73	<2.2e-16	0.68	<2.2e-16	0.75	<2.2e-16	0.49	<2.2e-16
EGFP-HDAC8	K562	Transcript	lincRNA	0.52	<2.2e-16	0.57	<2.2e-16	NA	NA	0.47	<2.2e-16	0.5	<2.2e-16	NA	NA	NA	NA	NA	NA	0.44	<2.2e-16	0.44	<2.2e-16	0.68	<2.2e-16	NA	NA	0.42	<2.2e-16	0.55	<2.2e-16	0.12	<2.2e-16	0.56	<2.2e-16	0.08	3e-10	0.64	<2.2e-16	0.43	<2.2e-16	0.7	<2.2e-16	0.59	<2.2e-16	0.65	<2.2e-16	0.48	<2.2e-16
EGFP-JUNB	K562	Transcript	lincRNA	0.66	<2.2e-16	0.68	<2.2e-16	NA	NA	0.68	<2.2e-16	0.57	<2.2e-16	NA	NA	NA	NA	NA	NA	0.51	<2.2e-16	0.5	<2.2e-16	0.75	<2.2e-16	NA	NA	0.46	<2.2e-16	0.59	<2.2e-16	0.1	3e-16	0.65	<2.2e-16	0.05	2e-05	0.72	<2.2e-16	0.56	<2.2e-16	0.77	<2.2e-16	0.62	<2.2e-16	0.69	<2.2e-16	0.48	<2.2e-16
EGFP-NR4A1	K562	Transcript	lincRNA	0.22	<2.2e-16	0.35	<2.2e-16	NA	NA	0.22	<2.2e-16	0.25	<2.2e-16	NA	NA	NA	NA	NA	NA	0.2	<2.2e-16	0.24	<2.2e-16	0.42	<2.2e-16	NA	NA	0.25	<2.2e-16	0.34	<2.2e-16	0.13	<2.2e-16	0.28	<2.2e-16	0.08	2e-10	0.36	<2.2e-16	0.19	<2.2e-16	0.42	<2.2e-16	0.32	<2.2e-16	0.38	<2.2e-16	0.27	<2.2e-16
EGR1	K562	Transcript	lincRNA	0.51	<2.2e-16	0.53	<2.2e-16	NA	NA	0.53	<2.2e-16	0.46	<2.2e-16	NA	NA	NA	NA	NA	NA	0.57	<2.2e-16	0.34	<2.2e-16	0.63	<2.2e-16	NA	NA	0.31	<2.2e-16	0.41	<2.2e-16	0.07	3e-09	0.64	<2.2e-16	0.03	0.03	0.7	<2.2e-16	0.46	<2.2e-16	0.63	<2.2e-16	0.59	<2.2e-16	0.62	<2.2e-16	0.44	<2.2e-16
ELF1	K562	Transcript	lincRNA	0.55	<2.2e-16	0.59	<2.2e-16	NA	NA	0.56	<2.2e-16	0.48	<2.2e-16	NA	NA	NA	NA	NA	NA	0.59	<2.2e-16	0.4	<2.2e-16	0.66	<2.2e-16	NA	NA	0.36	<2.2e-16	0.48	<2.2e-16	0.04	0.0005	0.68	<2.2e-16	0.01	0.6	0.67	<2.2e-16	0.5	<2.2e-16	0.64	<2.2e-16	0.61	<2.2e-16	0.67	<2.2e-16	0.42	<2.2e-16
ELK1	K562	Transcript	lincRNA	0.85	<2.2e-16	0.83	<2.2e-16	NA	NA	0.59	<2.2e-16	0.87	<2.2e-16	NA	NA	NA	NA	NA	NA	0.57	<2.2e-16	0.77	<2.2e-16	0.82	<2.2e-16	NA	NA	0.71	<2.2e-16	0.8	<2.2e-16	0.1	9e-16	0.61	<2.2e-16	0.04	0.0004	0.76	<2.2e-16	0.5	<2.2e-16	0.85	<2.2e-16	0.69	<2.2e-16	0.83	<2.2e-16	0.46	<2.2e-16
ETS1	K562	Transcript	lincRNA	0.57	<2.2e-16	0.61	<2.2e-16	NA	NA	0.59	<2.2e-16	0.53	<2.2e-16	NA	NA	NA	NA	NA	NA	0.67	<2.2e-16	0.4	<2.2e-16	0.72	<2.2e-16	NA	NA	0.35	<2.2e-16	0.5	<2.2e-16	0.07	3e-09	0.72	<2.2e-16	0.02	0.2	0.78	<2.2e-16	0.54	<2.2e-16	0.7	<2.2e-16	0.71	<2.2e-16	0.74	<2.2e-16	0.47	<2.2e-16
EZH2	K562	Transcript	lincRNA	0.35	<2.2e-16	0.4	<2.2e-16	NA	NA	0.24	<2.2e-16	0.39	<2.2e-16	NA	NA	NA	NA	NA	NA	0.21	<2.2e-16	0.35	<2.2e-16	0.38	<2.2e-16	NA	NA	0.36	<2.2e-16	0.39	<2.2e-16	0.71	<2.2e-16	0.29	<2.2e-16	0.65	<2.2e-16	0.27	<2.2e-16	0.26	<2.2e-16	0.37	<2.2e-16	0.42	<2.2e-16	0.36	<2.2e-16	0.41	<2.2e-16
FOSL1	K562	Transcript	lincRNA	0.6	<2.2e-16	0.59	<2.2e-16	NA	NA	0.65	<2.2e-16	0.55	<2.2e-16	NA	NA	NA	NA	NA	NA	0.46	<2.2e-16	0.5	<2.2e-16	0.59	<2.2e-16	NA	NA	0.47	<2.2e-16	0.54	<2.2e-16	0.08	7e-11	0.56	<2.2e-16	0.04	0.0009	0.54	<2.2e-16	0.49	<2.2e-16	0.62	<2.2e-16	0.49	<2.2e-16	0.56	<2.2e-16	0.41	<2.2e-16
GABP	K562	Transcript	lincRNA	0.46	<2.2e-16	0.47	<2.2e-16	NA	NA	0.46	<2.2e-16	0.39	<2.2e-16	NA	NA	NA	NA	NA	NA	0.5	<2.2e-16	0.33	<2.2e-16	0.5	<2.2e-16	NA	NA	0.29	<2.2e-16	0.38	<2.2e-16	0.03	0.02	0.55	<2.2e-16	0	1	0.54	<2.2e-16	0.44	<2.2e-16	0.55	<2.2e-16	0.49	<2.2e-16	0.5	<2.2e-16	0.33	<2.2e-16
GATA1	K562	Transcript	lincRNA	0.89	<2.2e-16	0.84	<2.2e-16	NA	NA	0.64	<2.2e-16	0.83	<2.2e-16	NA	NA	NA	NA	NA	NA	0.55	<2.2e-16	0.77	<2.2e-16	0.82	<2.2e-16	NA	NA	0.7	<2.2e-16	0.81	<2.2e-16	0.09	4e-13	0.62	<2.2e-16	0.05	0.0002	0.77	<2.2e-16	0.58	<2.2e-16	0.87	<2.2e-16	0.66	<2.2e-16	0.77	<2.2e-16	0.49	<2.2e-16
GTF2B	K562	Transcript	lincRNA	0.79	<2.2e-16	0.78	<2.2e-16	NA	NA	0.62	<2.2e-16	0.78	<2.2e-16	NA	NA	NA	NA	NA	NA	0.63	<2.2e-16	0.68	<2.2e-16	0.79	<2.2e-16	NA	NA	0.63	<2.2e-16	0.74	<2.2e-16	0.07	2e-07	0.65	<2.2e-16	0.01	0.3	0.77	<2.2e-16	0.54	<2.2e-16	0.83	<2.2e-16	0.7	<2.2e-16	0.81	<2.2e-16	0.44	<2.2e-16
GTF2F1	K562	Transcript	lincRNA	0.82	<2.2e-16	0.83	<2.2e-16	NA	NA	0.61	<2.2e-16	0.84	<2.2e-16	NA	NA	NA	NA	NA	NA	0.63	<2.2e-16	0.73	<2.2e-16	0.85	<2.2e-16	NA	NA	0.69	<2.2e-16	0.79	<2.2e-16	0.11	<2.2e-16	0.65	<2.2e-16	0.05	0.0002	0.8	<2.2e-16	0.53	<2.2e-16	0.86	<2.2e-16	0.72	<2.2e-16	0.86	<2.2e-16	0.46	<2.2e-16
GTF3C2	K562	Transcript	lincRNA	0.7	<2.2e-16	0.69	<2.2e-16	NA	NA	0.62	<2.2e-16	0.64	<2.2e-16	NA	NA	NA	NA	NA	NA	0.54	<2.2e-16	0.6	<2.2e-16	0.76	<2.2e-16	NA	NA	0.54	<2.2e-16	0.68	<2.2e-16	0.11	<2.2e-16	0.67	<2.2e-16	0.06	3e-07	0.73	<2.2e-16	0.55	<2.2e-16	0.76	<2.2e-16	0.66	<2.2e-16	0.73	<2.2e-16	0.54	<2.2e-16
H2AZ	K562	Transcript	lincRNA	0.66	<2.2e-16	0.61	<2.2e-16	NA	NA	0.52	<2.2e-16	0.57	<2.2e-16	NA	NA	NA	NA	NA	NA	0.48	<2.2e-16	0.51	<2.2e-16	0.69	<2.2e-16	NA	NA	0.45	<2.2e-16	0.57	<2.2e-16	0.14	<2.2e-16	0.75	<2.2e-16	0.12	<2.2e-16	0.61	<2.2e-16	0.56	<2.2e-16	0.66	<2.2e-16	0.68	<2.2e-16	0.63	<2.2e-16	0.63	<2.2e-16
H3K27AC	K562	Transcript	lincRNA	0.65	<2.2e-16	0.62	<2.2e-16	NA	NA	0.61	<2.2e-16	0.55	<2.2e-16	NA	NA	NA	NA	NA	NA	0.63	<2.2e-16	0.42	<2.2e-16	0.7	<2.2e-16	NA	NA	0.36	<2.2e-16	0.51	<2.2e-16	0.03	6	0.8	<2.2e-16	0	0.9	0.72	<2.2e-16	0.66	<2.2e-16	0.7	<2.2e-16	0.82	<2.2e-16	0.69	<2.2e-16	0.55	<2.2e-16
H3K27ME3	K562	Transcript	lincRNA	0	0.9	0.14	<2.2e-16	NA	NA	-0.04	0.0003	0.11	<2.2e-16	NA	NA	NA	NA	NA	NA	-0.06	8e-07	0.1	<2.2e-16	0.11	<2.2e-16	NA	NA	0.16	<2.2e-16	0.15	<2.2e-16	0.52	<2.2e-16	-0.08	2e-11	0.44	<2.2e-16	0.01	0.4	-0.08	4e-10	0.1	3e-16	0.04	2	0.1	5e-15	-0.01	0.6
H3K36ME3	K562	Transcript	lincRNA	0.45	<2.2e-16	0.37	<2.2e-16	NA	NA	0.29	<2.2e-16	0.43	<2.2e-16	NA	NA	NA	NA	NA	NA	0.31	<2.2e-16	0.45	<2.2e-16	0.37	<2.2e-16	NA	NA	0.4	<2.2e-16	0.45	<2.2e-16	0.05	0.0002	0.34	<2.2e-16	0.05	7e-05	0.33	<2.2e-16	0.31	<2.2e-16	0.42	<2.2e-16	0.47	<2.2e-16	0.41	<2.2e-16	0.41	<2.2e-16
H3K4ME1	K562	Transcript	lincRNA	0.61	<2.2e-16	0.55	<2.2e-16	NA	NA	0.44	<2.2e-16	0.53	<2.2e-16	NA	NA	NA	NA	NA	NA	0.32	<2.2e-16	0.55	<2.2e-16	0.59	<2.2e-16	NA	NA	0.48	<2.2e-16	0.58	<2.2e-16	0.11	<2.2e-16	0.58	<2.2e-16	0.1	<2.2e-16	0.49	<2.2e-16	0.49	<2.2e-16	0.63	<2.2e-16	0.53	<2.2e-16	0.52	<2.2e-16	0.61	<2.2e-16
H3K4ME2	K562	Transcript	lincRNA	0.64	<2.2e-16	0.62	<2.2e-16	NA	NA	0.57	<2.2e-16	0.56	<2.2e-16	NA	NA	NA	NA	NA	NA	0.61	<2.2e-16	0.45	<2.2e-16	0.73	<2.2e-16	NA	NA	0.39	<2.2e-16	0.53	<2.2e-16	0.08	7e-11	0.79	<2.2e-16	0.05	2e-05	0.73	<2.2e-16	0.62	<2.2e-16	0.7	<2.2e-16	0.85	<2.2e-16	0.71	<2.2e-16	0.57	<2.2e-16
H3K4ME3	K562	Transcript	lincRNA	0.64	<2.2e-16	0.6	<2.2e-16	NA	NA	0.56	<2.2e-16	0.55	<2.2e-16	NA	NA	NA	NA	NA	NA	0.61	<2.2e-16	0.43	<2.2e-16	0.7	<2.2e-16	NA	NA	0.37	<2.2e-16	0.51	<2.2e-16	0.08	3e-11	0.75	<2.2e-16	0.06	5e-06	0.72	<2.2e-16	0.61	<2.2e-16	0.68	<2.2e-16	0.85	<2.2e-16	0.7	<2.2e-16	0.55	<2.2e-16
H3K79ME2	K562	Transcript	lincRNA	0.5	<2.2e-16	0.44	<2.2e-16	NA	NA	0.4	<2.2e-16	0.44	<2.2e-16	NA	NA	NA	NA	NA	NA	0.49	<2.2e-16	0.37	<2.2e-16	0.52	<2.2e-16	NA	NA	0.32	<2.2e-16	0.42	<2.2e-16	0.01	0.3	0.51	<2.2e-16	0	0.9	0.53	<2.2e-16	0.45	<2.2e-16	0.52	<2.2e-16	0.71	<2.2e-16	0.55	<2.2e-16	0.41	<2.2e-16
H3K9AC	K562	Transcript	lincRNA	0.63	<2.2e-16	0.6	<2.2e-16	NA	NA	0.58	<2.2e-16	0.55	<2.2e-16	NA	NA	NA	NA	NA	NA	0.65	<2.2e-16	0.42	<2.2e-16	0.69	<2.2e-16	NA	NA	0.35	<2.2e-16	0.5	<2.2e-16	0.05	0.0002	0.75	<2.2e-16	0.02	0.2	0.72	<2.2e-16	0.62	<2.2e-16	0.68	<2.2e-16	0.85	<2.2e-16	0.7	<2.2e-16	0.53	<2.2e-16
H3K9ME1	K562	Transcript	lincRNA	0.47	<2.2e-16	0.49	<2.2e-16	NA	NA	0.29	<2.2e-16	0.51	<2.2e-16	NA	NA	NA	NA	NA	NA	0.27	<2.2e-16	0.52	<2.2e-16	0.48	<2.2e-16	NA	NA	0.5	<2.2e-16	0.54	<2.2e-16	0.36	<2.2e-16	0.37	<2.2e-16	0.32	<2.2e-16	0.35	<2.2e-16	0.31	<2.2e-16	0.5	<2.2e-16	0.51	<2.2e-16	0.47	<2.2e-16	0.55	<2.2e-16
H3K9ME3	K562	Transcript	lincRNA	0.32	<2.2e-16	0.29	<2.2e-16	NA	NA	0.15	<2.2e-16	0.36	<2.2e-16	NA	NA	NA	NA	NA	NA	0.15	<2.2e-16	0.36	<2.2e-16	0.22	<2.2e-16	NA	NA	0.33	<2.2e-16	0.33	<2.2e-16	0.11	<2.2e-16	0.24	<2.2e-16	0.11	<2.2e-16	0.16	<2.2e-16	0.16	<2.2e-16	0.21	<2.2e-16	0.27	<2.2e-16	0.23	<2.2e-16	0.33	<2.2e-16
H4K20ME1	K562	Transcript	lincRNA	0.29	<2.2e-16	0.38	<2.2e-16	NA	NA	0.22	<2.2e-16	0.36	<2.2e-16	NA	NA	NA	NA	NA	NA	0.23	<2.2e-16	0.34	<2.2e-16	0.39	<2.2e-16	NA	NA	0.35	<2.2e-16	0.39	<2.2e-16	0.45	<2.2e-16	0.23	<2.2e-16	0.4	<2.2e-16	0.3	<2.2e-16	0.21	<2.2e-16	0.39	<2.2e-16	0.45	<2.2e-16	0.4	<2.2e-16	0.39	<2.2e-16
HCFC1	K562	Transcript	lincRNA	0.79	<2.2e-16	0.81	<2.2e-16	NA	NA	0.66	<2.2e-16	0.75	<2.2e-16	NA	NA	NA	NA	NA	NA	0.66	<2.2e-16	0.63	<2.2e-16	0.84	<2.2e-16	NA	NA	0.58	<2.2e-16	0.71	<2.2e-16	0.09	2e-13	0.73	<2.2e-16	0.04	2	0.82	<2.2e-16	0.58	<2.2e-16	0.84	<2.2e-16	0.75	<2.2e-16	0.84	<2.2e-16	0.5	<2.2e-16
HDAC1	K562	Transcript	lincRNA	0.63	<2.2e-16	0.68	<2.2e-16	NA	NA	0.57	<2.2e-16	0.6	<2.2e-16	NA	NA	NA	NA	NA	NA	0.57	<2.2e-16	0.5	<2.2e-16	0.78	<2.2e-16	NA	NA	0.47	<2.2e-16	0.59	<2.2e-16	0.22	<2.2e-16	0.76	<2.2e-16	0.17	<2.2e-16	0.75	<2.2e-16	0.58	<2.2e-16	0.74	<2.2e-16	0.85	<2.2e-16	0.75	<2.2e-16	0.7	<2.2e-16
HDAC2	K562	Transcript	lincRNA	0.58	<2.2e-16	0.62	<2.2e-16	NA	NA	0.49	<2.2e-16	0.57	<2.2e-16	NA	NA	NA	NA	NA	NA	0.49	<2.2e-16	0.49	<2.2e-16	0.74	<2.2e-16	NA	NA	0.47	<2.2e-16	0.58	<2.2e-16	0.27	<2.2e-16	0.7	<2.2e-16	0.22	<2.2e-16	0.68	<2.2e-16	0.52	<2.2e-16	0.71	<2.2e-16	0.76	<2.2e-16	0.7	<2.2e-16	0.71	<2.2e-16
HDAC6	K562	Transcript	lincRNA	0.49	<2.2e-16	0.56	<2.2e-16	NA	NA	0.41	<2.2e-16	0.53	<2.2e-16	NA	NA	NA	NA	NA	NA	0.43	<2.2e-16	0.47	<2.2e-16	0.61	<2.2e-16	NA	NA	0.47	<2.2e-16	0.54	<2.2e-16	0.34	<2.2e-16	0.54	<2.2e-16	0.28	<2.2e-16	0.55	<2.2e-16	0.43	<2.2e-16	0.6	<2.2e-16	0.71	<2.2e-16	0.62	<2.2e-16	0.64	<2.2e-16
HMGN3	K562	Transcript	lincRNA	0.69	<2.2e-16	0.72	<2.2e-16	NA	NA	0.59	<2.2e-16	0.68	<2.2e-16	NA	NA	NA	NA	NA	NA	0.59	<2.2e-16	0.55	<2.2e-16	0.85	<2.2e-16	NA	NA	0.52	<2.2e-16	0.65	<2.2e-16	0.1	<2.2e-16	0.66	<2.2e-16	0.05	0.0002	0.91	<2.2e-16	0.51	<2.2e-16	0.85	<2.2e-16	0.71	<2.2e-16	0.82	<2.2e-16	0.5	<2.2e-16
IRF1	K562	Transcript	lincRNA	0.8	<2.2e-16	0.75	<2.2e-16	NA	NA	0.52	<2.2e-16	0.81	<2.2e-16	NA	NA	NA	NA	NA	NA	0.46	<2.2e-16	0.73	<2.2e-16	0.7	<2.2e-16	NA	NA	0.69	<2.2e-16	0.75	<2.2e-16	0.02	0.07	0.48	<2.2e-16	-0.03	0.02	0.62	<2.2e-16	0.44	<2.2e-16	0.74	<2.2e-16	0.52	<2.2e-16	0.69	<2.2e-16	0.3	<2.2e-16
JARID1B-PLU1	K562	Transcript	lincRNA	0.61	<2.2e-16	0.62	<2.2e-16	NA	NA	0.58	<2.2e-16	0.56	<2.2e-16	NA	NA	NA	NA	NA	NA	0.67	<2.2e-16	0.43	<2.2e-16	0.73	<2.2e-16	NA	NA	0.39	<2.2e-16	0.53	<2.2e-16	0.15	<2.2e-16	0.79	<2.2e-16	0.1	2e-15	0.76	<2.2e-16	0.63	<2.2e-16	0.73	<2.2e-16	0.89	<2.2e-16	0.75	<2.2e-16	0.61	<2.2e-16
JUN	K562	Transcript	lincRNA	0.86	<2.2e-16	0.87	<2.2e-16	NA	NA	0.75	<2.2e-16	0.8	<2.2e-16	NA	NA	NA	NA	NA	NA	0.61	<2.2e-16	0.72	<2.2e-16	0.88	<2.2e-16	NA	NA	0.66	<2.2e-16	0.78	<2.2e-16	0.1	2e-15	0.72	<2.2e-16	0.05	0.0002	0.82	<2.2e-16	0.62	<2.2e-16	0.87	<2.2e-16	0.72	<2.2e-16	0.82	<2.2e-16	0.52	<2.2e-16
KAP1	K562	Transcript	lincRNA	0.74	<2.2e-16	0.63	<2.2e-16	NA	NA	0.43	<2.2e-16	0.74	<2.2e-16	NA	NA	NA	NA	NA	NA	0.42	<2.2e-16	0.67	<2.2e-16	0.56	<2.2e-16	NA	NA	0.6	<2.2e-16	0.64	<2.2e-16	-0.04	2	0.44	<2.2e-16	-0.07	6e-09	0.52	<2.2e-16	0.36	<2.2e-16	0.6	<2.2e-16	0.44	<2.2e-16	0.58	<2.2e-16	0.28	<2.2e-16
KAT2B-PCAF	K562	Transcript	lincRNA	0.48	<2.2e-16	0.51	<2.2e-16	NA	NA	0.39	<2.2e-16	0.46	<2.2e-16	NA	NA	NA	NA	NA	NA	0.39	<2.2e-16	0.42	<2.2e-16	0.51	<2.2e-16	NA	NA	0.4	<2.2e-16	0.46	<2.2e-16	0.34	<2.2e-16	0.54	<2.2e-16	0.31	<2.2e-16	0.47	<2.2e-16	0.43	<2.2e-16	0.48	<2.2e-16	0.66	<2.2e-16	0.5	<2.2e-16	0.67	<2.2e-16
KDM1A-LSD1	K562	Transcript	lincRNA	0.59	<2.2e-16	0.58	<2.2e-16	NA	NA	0.5	<2.2e-16	0.5	<2.2e-16	NA	NA	NA	NA	NA	NA	0.44	<2.2e-16	0.47	<2.2e-16	0.62	<2.2e-16	NA	NA	0.42	<2.2e-16	0.52	<2.2e-16	0.26	<2.2e-16	0.68	<2.2e-16	0.24	<2.2e-16	0.58	<2.2e-16	0.56	<2.2e-16	0.62	<2.2e-16	0.69	<2.2e-16	0.56	<2.2e-16	0.76	<2.2e-16
MAFF	K562	Transcript	lincRNA	0.84	<2.2e-16	0.77	<2.2e-16	NA	NA	0.58	<2.2e-16	0.85	<2.2e-16	NA	NA	NA	NA	NA	NA	0.5	<2.2e-16	0.77	<2.2e-16	0.72	<2.2e-16	NA	NA	0.69	<2.2e-16	0.77	<2.2e-16	0.07	4e-09	0.52	<2.2e-16	0.02	0.06	0.63	<2.2e-16	0.51	<2.2e-16	0.76	<2.2e-16	0.58	<2.2e-16	0.72	<2.2e-16	0.39	<2.2e-16
MAFK	K562	Transcript	lincRNA	0.87	<2.2e-16	0.83	<2.2e-16	NA	NA	0.64	<2.2e-16	0.86	<2.2e-16	NA	NA	NA	NA	NA	NA	0.52	<2.2e-16	0.78	<2.2e-16	0.81	<2.2e-16	NA	NA	0.71	<2.2e-16	0.8	<2.2e-16	0.08	8e-12	0.59	<2.2e-16	0.04	3	0.72	<2.2e-16	0.55	<2.2e-16	0.82	<2.2e-16	0.65	<2.2e-16	0.77	<2.2e-16	0.47	<2.2e-16
MAX	K562	Transcript	lincRNA	0.73	<2.2e-16	0.75	<2.2e-16	NA	NA	0.68	<2.2e-16	0.67	<2.2e-16	NA	NA	NA	NA	NA	NA	0.64	<2.2e-16	0.54	<2.2e-16	0.88	<2.2e-16	NA	NA	0.49	<2.2e-16	0.64	<2.2e-16	0.07	4e-09	0.78	<2.2e-16	0.03	0.02	0.85	<2.2e-16	0.63	<2.2e-16	0.83	<2.2e-16	0.75	<2.2e-16	0.81	<2.2e-16	0.52	<2.2e-16
MAZ	K562	Transcript	lincRNA	0.76	<2.2e-16	0.78	<2.2e-16	NA	NA	0.68	<2.2e-16	0.71	<2.2e-16	NA	NA	NA	NA	NA	NA	0.63	<2.2e-16	0.58	<2.2e-16	0.87	<2.2e-16	NA	NA	0.54	<2.2e-16	0.67	<2.2e-16	0.09	5e-14	0.75	<2.2e-16	0.04	2	0.89	<2.2e-16	0.59	<2.2e-16	0.87	<2.2e-16	0.76	<2.2e-16	0.84	<2.2e-16	0.54	<2.2e-16
MEF2A	K562	Transcript	lincRNA	0.66	<2.2e-16	0.6	<2.2e-16	NA	NA	0.57	<2.2e-16	0.58	<2.2e-16	NA	NA	NA	NA	NA	NA	0.58	<2.2e-16	0.52	<2.2e-16	0.61	<2.2e-16	NA	NA	0.46	<2.2e-16	0.57	<2.2e-16	0.05	3e-05	0.59	<2.2e-16	0.02	0.3	0.59	<2.2e-16	0.54	<2.2e-16	0.64	<2.2e-16	0.57	<2.2e-16	0.6	<2.2e-16	0.39	<2.2e-16
MXI1	K562	Transcript	lincRNA	0.85	<2.2e-16	0.81	<2.2e-16	NA	NA	0.63	<2.2e-16	0.85	<2.2e-16	NA	NA	NA	NA	NA	NA	0.63	<2.2e-16	0.71	<2.2e-16	0.83	<2.2e-16	NA	NA	0.65	<2.2e-16	0.75	<2.2e-16	0.06	2e-06	0.65	<2.2e-16	0.01	0.5	0.8	<2.2e-16	0.55	<2.2e-16	0.84	<2.2e-16	0.71	<2.2e-16	0.84	<2.2e-16	0.44	<2.2e-16
MYC	K562	Transcript	lincRNA	0.76	<2.2e-16	0.75	<2.2e-16	NA	NA	0.65	<2.2e-16	0.7	<2.2e-16	NA	NA	NA	NA	NA	NA	0.67	<2.2e-16	0.59	<2.2e-16	0.83	<2.2e-16	NA	NA	0.53	<2.2e-16	0.66	<2.2e-16	0.1	5e-16	0.78	<2.2e-16	0.05	0.0002	0.82	<2.2e-16	0.64	<2.2e-16	0.81	<2.2e-16	0.8	<2.2e-16	0.79	<2.2e-16	0.57	<2.2e-16
NCOR1	K562	Transcript	lincRNA	0.39	<2.2e-16	0.37	<2.2e-16	NA	NA	0.38	<2.2e-16	0.33	<2.2e-16	NA	NA	NA	NA	NA	NA	0.35	<2.2e-16	0.28	<2.2e-16	0.43	<2.2e-16	NA	NA	0.26	<2.2e-16	0.33	<2.2e-16	0.3	<2.2e-16	0.54	<2.2e-16	0.29	<2.2e-16	0.42	<2.2e-16	0.44	<2.2e-16	0.39	<2.2e-16	0.62	<2.2e-16	0.41	<2.2e-16	0.7	<2.2e-16
NFE2	K562	Transcript	lincRNA	0.64	<2.2e-16	0.69	<2.2e-16	NA	NA	0.47	<2.2e-16	0.7	<2.2e-16	NA	NA	NA	NA	NA	NA	0.38	<2.2e-16	0.65	<2.2e-16	0.7	<2.2e-16	NA	NA	0.64	<2.2e-16	0.71	<2.2e-16	0.15	<2.2e-16	0.48	<2.2e-16	0.09	2e-13	0.61	<2.2e-16	0.39	<2.2e-16	0.7	<2.2e-16	0.53	<2.2e-16	0.69	<2.2e-16	0.39	<2.2e-16
NFYA	K562	Transcript	lincRNA	0.76	<2.2e-16	0.77	<2.2e-16	NA	NA	0.56	<2.2e-16	0.76	<2.2e-16	NA	NA	NA	NA	NA	NA	0.49	<2.2e-16	0.69	<2.2e-16	0.76	<2.2e-16	NA	NA	0.64	<2.2e-16	0.74	<2.2e-16	0.07	3e-08	0.54	<2.2e-16	0.02	0.05	0.69	<2.2e-16	0.46	<2.2e-16	0.79	<2.2e-16	0.58	<2.2e-16	0.74	<2.2e-16	0.39	<2.2e-16
NFYB	K562	Transcript	lincRNA	0.48	<2.2e-16	0.55	<2.2e-16	NA	NA	0.42	<2.2e-16	0.47	<2.2e-16	NA	NA	NA	NA	NA	NA	0.38	<2.2e-16	0.41	<2.2e-16	0.58	<2.2e-16	NA	NA	0.38	<2.2e-16	0.48	<2.2e-16	0.07	2e-09	0.45	<2.2e-16	0.04	4	0.53	<2.2e-16	0.36	<2.2e-16	0.57	<2.2e-16	0.44	<2.2e-16	0.57	<2.2e-16	0.29	<2.2e-16
NR2F2	K562	Transcript	lincRNA	0.66	<2.2e-16	0.63	<2.2e-16	NA	NA	0.67	<2.2e-16	0.55	<2.2e-16	NA	NA	NA	NA	NA	NA	0.64	<2.2e-16	0.46	<2.2e-16	0.7	<2.2e-16	NA	NA	0.4	<2.2e-16	0.53	<2.2e-16	0.06	5e-07	0.86	<2.2e-16	0.02	0.09	0.71	<2.2e-16	0.73	<2.2e-16	0.74	<2.2e-16	0.73	<2.2e-16	0.68	<2.2e-16	0.61	<2.2e-16
NRF1	K562	Transcript	lincRNA	0.75	<2.2e-16	0.71	<2.2e-16	NA	NA	0.45	<2.2e-16	0.79	<2.2e-16	NA	NA	NA	NA	NA	NA	0.4	<2.2e-16	0.73	<2.2e-16	0.63	<2.2e-16	NA	NA	0.67	<2.2e-16	0.73	<2.2e-16	0.05	6e-05	0.39	<2.2e-16	0	0.7	0.56	<2.2e-16	0.36	<2.2e-16	0.67	<2.2e-16	0.46	<2.2e-16	0.63	<2.2e-16	0.26	<2.2e-16
P300	K562	Transcript	lincRNA	0.83	<2.2e-16	0.75	<2.2e-16	NA	NA	0.52	<2.2e-16	0.84	<2.2e-16	NA	NA	NA	NA	NA	NA	0.48	<2.2e-16	0.74	<2.2e-16	0.68	<2.2e-16	NA	NA	0.68	<2.2e-16	0.73	<2.2e-16	0.02	0.2	0.47	<2.2e-16	-0.02	0.07	0.62	<2.2e-16	0.44	<2.2e-16	0.71	<2.2e-16	0.53	<2.2e-16	0.68	<2.2e-16	0.33	<2.2e-16
PHF8	K562	Transcript	lincRNA	0.51	<2.2e-16	0.54	<2.2e-16	NA	NA	0.51	<2.2e-16	0.45	<2.2e-16	NA	NA	NA	NA	NA	NA	0.61	<2.2e-16	0.33	<2.2e-16	0.65	<2.2e-16	NA	NA	0.29	<2.2e-16	0.42	<2.2e-16	0.09	2e-12	0.75	<2.2e-16	0.03	7	0.69	<2.2e-16	0.55	<2.2e-16	0.62	<2.2e-16	0.79	<2.2e-16	0.66	<2.2e-16	0.51	<2.2e-16
PML	K562	Transcript	lincRNA	0.63	<2.2e-16	0.6	<2.2e-16	NA	NA	0.63	<2.2e-16	0.55	<2.2e-16	NA	NA	NA	NA	NA	NA	0.75	<2.2e-16	0.43	<2.2e-16	0.65	<2.2e-16	NA	NA	0.37	<2.2e-16	0.5	<2.2e-16	0.03	0.02	0.69	<2.2e-16	-0.01	0.4	0.7	<2.2e-16	0.65	<2.2e-16	0.71	<2.2e-16	0.69	<2.2e-16	0.69	<2.2e-16	0.42	<2.2e-16
POL2	K562	Transcript	lincRNA	0.55	<2.2e-16	0.56	<2.2e-16	NA	NA	0.57	<2.2e-16	0.5	<2.2e-16	NA	NA	NA	NA	NA	NA	0.74	<2.2e-16	0.36	<2.2e-16	0.64	<2.2e-16	NA	NA	0.3	<2.2e-16	0.45	<2.2e-16	0.01	0.3	0.67	<2.2e-16	-0.03	0.02	0.73	<2.2e-16	0.56	<2.2e-16	0.7	<2.2e-16	0.73	<2.2e-16	0.72	<2.2e-16	0.39	<2.2e-16
POL3	K562	Transcript	lincRNA	0.5	<2.2e-16	0.51	<2.2e-16	NA	NA	0.34	<2.2e-16	0.52	<2.2e-16	NA	NA	NA	NA	NA	NA	0.27	<2.2e-16	0.55	<2.2e-16	0.46	<2.2e-16	NA	NA	0.5	<2.2e-16	0.57	<2.2e-16	0.06	3e-06	0.29	<2.2e-16	0.01	0.3	0.37	<2.2e-16	0.28	<2.2e-16	0.48	<2.2e-16	0.35	<2.2e-16	0.46	<2.2e-16	0.22	<2.2e-16
RAD21	K562	Transcript	lincRNA	0.7	<2.2e-16	0.66	<2.2e-16	NA	NA	0.49	<2.2e-16	0.68	<2.2e-16	NA	NA	NA	NA	NA	NA	0.42	<2.2e-16	0.66	<2.2e-16	0.64	<2.2e-16	NA	NA	0.61	<2.2e-16	0.69	<2.2e-16	0.11	<2.2e-16	0.49	<2.2e-16	0.05	2e-05	0.54	<2.2e-16	0.42	<2.2e-16	0.65	<2.2e-16	0.49	<2.2e-16	0.62	<2.2e-16	0.37	<2.2e-16
RBBP5	K562	Transcript	lincRNA	0.65	<2.2e-16	0.66	<2.2e-16	NA	NA	0.59	<2.2e-16	0.59	<2.2e-16	NA	NA	NA	NA	NA	NA	0.62	<2.2e-16	0.48	<2.2e-16	0.78	<2.2e-16	NA	NA	0.44	<2.2e-16	0.57	<2.2e-16	0.16	<2.2e-16	0.78	<2.2e-16	0.12	<2.2e-16	0.78	<2.2e-16	0.61	<2.2e-16	0.74	<2.2e-16	0.88	<2.2e-16	0.76	<2.2e-16	0.66	<2.2e-16
RDBP-NELF-E	K562	Transcript	lincRNA	0.64	<2.2e-16	0.68	<2.2e-16	NA	NA	0.44	<2.2e-16	0.7	<2.2e-16	NA	NA	NA	NA	NA	NA	0.45	<2.2e-16	0.67	<2.2e-16	0.65	<2.2e-16	NA	NA	0.63	<2.2e-16	0.71	<2.2e-16	0.12	<2.2e-16	0.45	<2.2e-16	0.06	3e-06	0.6	<2.2e-16	0.37	<2.2e-16	0.67	<2.2e-16	0.57	<2.2e-16	0.67	<2.2e-16	0.37	<2.2e-16
REST	K562	Transcript	lincRNA	0.55	<2.2e-16	0.55	<2.2e-16	NA	NA	0.57	<2.2e-16	0.48	<2.2e-16	NA	NA	NA	NA	NA	NA	0.55	<2.2e-16	0.37	<2.2e-16	0.62	<2.2e-16	NA	NA	0.32	<2.2e-16	0.45	<2.2e-16	0.05	0.0003	0.63	<2.2e-16	0	1	0.65	<2.2e-16	0.52	<2.2e-16	0.63	<2.2e-16	0.58	<2.2e-16	0.59	<2.2e-16	0.4	<2.2e-16
RFX5	K562	Transcript	lincRNA	0.83	<2.2e-16	0.78	<2.2e-16	NA	NA	0.53	<2.2e-16	0.85	<2.2e-16	NA	NA	NA	NA	NA	NA	0.51	<2.2e-16	0.74	<2.2e-16	0.71	<2.2e-16	NA	NA	0.69	<2.2e-16	0.74	<2.2e-16	0.05	3e-05	0.5	<2.2e-16	0	0.9	0.65	<2.2e-16	0.44	<2.2e-16	0.74	<2.2e-16	0.58	<2.2e-16	0.73	<2.2e-16	0.36	<2.2e-16
RNF2	K562	Transcript	lincRNA	0.21	<2.2e-16	0.24	<2.2e-16	NA	NA	0.21	<2.2e-16	0.2	<2.2e-16	NA	NA	NA	NA	NA	NA	0.23	<2.2e-16	0.16	<2.2e-16	0.3	<2.2e-16	NA	NA	0.15	<2.2e-16	0.2	<2.2e-16	0.79	<2.2e-16	0.36	<2.2e-16	0.78	<2.2e-16	0.25	<2.2e-16	0.28	<2.2e-16	0.26	<2.2e-16	0.44	<2.2e-16	0.27	<2.2e-16	0.51	<2.2e-16
RPC155	K562	Transcript	lincRNA	0.73	<2.2e-16	0.7	<2.2e-16	NA	NA	0.51	<2.2e-16	0.73	<2.2e-16	NA	NA	NA	NA	NA	NA	0.43	<2.2e-16	0.75	<2.2e-16	0.68	<2.2e-16	NA	NA	0.68	<2.2e-16	0.76	<2.2e-16	0.11	<2.2e-16	0.49	<2.2e-16	0.07	2e-08	0.58	<2.2e-16	0.42	<2.2e-16	0.69	<2.2e-16	0.54	<2.2e-16	0.66	<2.2e-16	0.42	<2.2e-16
SAP30	K562	Transcript	lincRNA	0.61	<2.2e-16	0.65	<2.2e-16	NA	NA	0.53	<2.2e-16	0.58	<2.2e-16	NA	NA	NA	NA	NA	NA	0.57	<2.2e-16	0.49	<2.2e-16	0.72	<2.2e-16	NA	NA	0.44	<2.2e-16	0.56	<2.2e-16	0.19	<2.2e-16	0.7	<2.2e-16	0.15	<2.2e-16	0.7	<2.2e-16	0.55	<2.2e-16	0.68	<2.2e-16	0.84	<2.2e-16	0.71	<2.2e-16	0.64	<2.2e-16
SETDB1	K562	Transcript	lincRNA	0.5	<2.2e-16	0.58	<2.2e-16	NA	NA	0.43	<2.2e-16	0.52	<2.2e-16	NA	NA	NA	NA	NA	NA	0.42	<2.2e-16	0.47	<2.2e-16	0.62	<2.2e-16	NA	NA	0.46	<2.2e-16	0.55	<2.2e-16	0.32	<2.2e-16	0.57	<2.2e-16	0.27	<2.2e-16	0.55	<2.2e-16	0.44	<2.2e-16	0.59	<2.2e-16	0.71	<2.2e-16	0.61	<2.2e-16	0.66	<2.2e-16
SIN3AK20	K562	Transcript	lincRNA	0.59	<2.2e-16	0.61	<2.2e-16	NA	NA	0.59	<2.2e-16	0.55	<2.2e-16	NA	NA	NA	NA	NA	NA	0.68	<2.2e-16	0.42	<2.2e-16	0.72	<2.2e-16	NA	NA	0.35	<2.2e-16	0.51	<2.2e-16	0.05	0.0002	0.69	<2.2e-16	0	1	0.76	<2.2e-16	0.55	<2.2e-16	0.7	<2.2e-16	0.73	<2.2e-16	0.74	<2.2e-16	0.43	<2.2e-16
SIRT6	K562	Transcript	lincRNA	0.86	<2.2e-16	0.79	<2.2e-16	NA	NA	0.6	<2.2e-16	0.8	<2.2e-16	NA	NA	NA	NA	NA	NA	0.53	<2.2e-16	0.81	<2.2e-16	0.78	<2.2e-16	NA	NA	0.7	<2.2e-16	0.82	<2.2e-16	0.1	5e-16	0.6	<2.2e-16	0.06	1e-06	0.67	<2.2e-16	0.56	<2.2e-16	0.78	<2.2e-16	0.64	<2.2e-16	0.73	<2.2e-16	0.47	<2.2e-16
SIX5	K562	Transcript	lincRNA	0.36	<2.2e-16	0.4	<2.2e-16	NA	NA	0.35	<2.2e-16	0.33	<2.2e-16	NA	NA	NA	NA	NA	NA	0.37	<2.2e-16	0.28	<2.2e-16	0.38	<2.2e-16	NA	NA	0.24	<2.2e-16	0.33	<2.2e-16	0.05	0.0003	0.37	<2.2e-16	0.02	0.2	0.38	<2.2e-16	0.32	<2.2e-16	0.39	<2.2e-16	0.38	<2.2e-16	0.41	<2.2e-16	0.22	<2.2e-16
SMARCA4-BRG1	K562	Transcript	lincRNA	0.87	<2.2e-16	0.76	<2.2e-16	NA	NA	0.63	<2.2e-16	0.82	<2.2e-16	NA	NA	NA	NA	NA	NA	0.62	<2.2e-16	0.72	<2.2e-16	0.77	<2.2e-16	NA	NA	0.63	<2.2e-16	0.74	<2.2e-16	0.04	3	0.63	<2.2e-16	0	0.8	0.76	<2.2e-16	0.58	<2.2e-16	0.83	<2.2e-16	0.7	<2.2e-16	0.79	<2.2e-16	0.48	<2.2e-16
SMARCB1-INI1	K562	Transcript	lincRNA	0.88	<2.2e-16	0.78	<2.2e-16	NA	NA	0.61	<2.2e-16	0.84	<2.2e-16	NA	NA	NA	NA	NA	NA	0.6	<2.2e-16	0.74	<2.2e-16	0.78	<2.2e-16	NA	NA	0.66	<2.2e-16	0.76	<2.2e-16	0.06	3e-07	0.62	<2.2e-16	0.03	0.02	0.75	<2.2e-16	0.56	<2.2e-16	0.83	<2.2e-16	0.7	<2.2e-16	0.8	<2.2e-16	0.49	<2.2e-16
SMC3	K562	Transcript	lincRNA	0.73	<2.2e-16	0.71	<2.2e-16	NA	NA	0.55	<2.2e-16	0.73	<2.2e-16	NA	NA	NA	NA	NA	NA	0.5	<2.2e-16	0.65	<2.2e-16	0.75	<2.2e-16	NA	NA	0.61	<2.2e-16	0.7	<2.2e-16	0.13	<2.2e-16	0.57	<2.2e-16	0.07	9e-08	0.68	<2.2e-16	0.47	<2.2e-16	0.76	<2.2e-16	0.6	<2.2e-16	0.74	<2.2e-16	0.44	<2.2e-16
SP1	K562	Transcript	lincRNA	0.57	<2.2e-16	0.59	<2.2e-16	NA	NA	0.59	<2.2e-16	0.49	<2.2e-16	NA	NA	NA	NA	NA	NA	0.61	<2.2e-16	0.39	<2.2e-16	0.63	<2.2e-16	NA	NA	0.34	<2.2e-16	0.46	<2.2e-16	0.05	4e-05	0.65	<2.2e-16	0.02	0.2	0.66	<2.2e-16	0.55	<2.2e-16	0.62	<2.2e-16	0.6	<2.2e-16	0.64	<2.2e-16	0.42	<2.2e-16
SP2	K562	Transcript	lincRNA	0.42	<2.2e-16	0.48	<2.2e-16	NA	NA	0.35	<2.2e-16	0.43	<2.2e-16	NA	NA	NA	NA	NA	NA	0.31	<2.2e-16	0.42	<2.2e-16	0.46	<2.2e-16	NA	NA	0.42	<2.2e-16	0.46	<2.2e-16	0.14	<2.2e-16	0.37	<2.2e-16	0.09	2e-13	0.4	<2.2e-16	0.29	<2.2e-16	0.46	<2.2e-16	0.43	<2.2e-16	0.47	<2.2e-16	0.35	<2.2e-16
SPI1-PU1	K562	Transcript	lincRNA	0.14	<2.2e-16	0.15	<2.2e-16	NA	NA	0.23	<2.2e-16	0.06	2e-07	NA	NA	NA	NA	NA	NA	0.23	<2.2e-16	0.06	2e-06	0.18	<2.2e-16	NA	NA	0.03	0.02	0.08	3e-11	0.2	<2.2e-16	0.42	<2.2e-16	0.21	<2.2e-16	0.16	<2.2e-16	0.33	<2.2e-16	0.14	<2.2e-16	0.36	<2.2e-16	0.18	<2.2e-16	0.48	<2.2e-16
SRF	K562	Transcript	lincRNA	0.62	<2.2e-16	0.63	<2.2e-16	NA	NA	0.56	<2.2e-16	0.57	<2.2e-16	NA	NA	NA	NA	NA	NA	0.55	<2.2e-16	0.52	<2.2e-16	0.63	<2.2e-16	NA	NA	0.47	<2.2e-16	0.56	<2.2e-16	0.05	4e-05	0.57	<2.2e-16	0.02	0.2	0.58	<2.2e-16	0.49	<2.2e-16	0.67	<2.2e-16	0.55	<2.2e-16	0.62	<2.2e-16	0.38	<2.2e-16
STAT1	K562	Transcript	lincRNA	0.83	<2.2e-16	0.82	<2.2e-16	NA	NA	0.62	<2.2e-16	0.8	<2.2e-16	NA	NA	NA	NA	NA	NA	0.57	<2.2e-16	0.75	<2.2e-16	0.81	<2.2e-16	NA	NA	0.68	<2.2e-16	0.8	<2.2e-16	0.09	9e-14	0.64	<2.2e-16	0.04	1	0.74	<2.2e-16	0.55	<2.2e-16	0.83	<2.2e-16	0.67	<2.2e-16	0.79	<2.2e-16	0.47	<2.2e-16
STAT2	K562	Transcript	lincRNA	0.8	<2.2e-16	0.81	<2.2e-16	NA	NA	0.66	<2.2e-16	0.77	<2.2e-16	NA	NA	NA	NA	NA	NA	0.59	<2.2e-16	0.71	<2.2e-16	0.84	<2.2e-16	NA	NA	0.65	<2.2e-16	0.78	<2.2e-16	0.11	<2.2e-16	0.69	<2.2e-16	0.05	0.0001	0.79	<2.2e-16	0.57	<2.2e-16	0.86	<2.2e-16	0.7	<2.2e-16	0.81	<2.2e-16	0.5	<2.2e-16
STAT5A	K562	Transcript	lincRNA	0.57	<2.2e-16	0.5	<2.2e-16	NA	NA	0.53	<2.2e-16	0.46	<2.2e-16	NA	NA	NA	NA	NA	NA	0.51	<2.2e-16	0.42	<2.2e-16	0.52	<2.2e-16	NA	NA	0.34	<2.2e-16	0.45	<2.2e-16	0.13	<2.2e-16	0.64	<2.2e-16	0.1	<2.2e-16	0.51	<2.2e-16	0.63	<2.2e-16	0.56	<2.2e-16	0.6	<2.2e-16	0.49	<2.2e-16	0.55	<2.2e-16
SUZ12	K562	Transcript	lincRNA	0.13	<2.2e-16	0.18	<2.2e-16	NA	NA	0.13	<2.2e-16	0.15	<2.2e-16	NA	NA	NA	NA	NA	NA	0.16	<2.2e-16	0.1	<2.2e-16	0.24	<2.2e-16	NA	NA	0.14	<2.2e-16	0.16	<2.2e-16	0.64	<2.2e-16	0.24	<2.2e-16	0.59	<2.2e-16	0.19	<2.2e-16	0.18	<2.2e-16	0.2	<2.2e-16	0.35	<2.2e-16	0.23	<2.2e-16	0.41	<2.2e-16
TAF1	K562	Transcript	lincRNA	0.6	<2.2e-16	0.6	<2.2e-16	NA	NA	0.58	<2.2e-16	0.53	<2.2e-16	NA	NA	NA	NA	NA	NA	0.68	<2.2e-16	0.38	<2.2e-16	0.68	<2.2e-16	NA	NA	0.34	<2.2e-16	0.49	<2.2e-16	0.02	0.07	0.69	<2.2e-16	-0.02	0.2	0.74	<2.2e-16	0.57	<2.2e-16	0.69	<2.2e-16	0.74	<2.2e-16	0.71	<2.2e-16	0.4	<2.2e-16
TAF7	K562	Transcript	lincRNA	0.59	<2.2e-16	0.55	<2.2e-16	NA	NA	0.59	<2.2e-16	0.53	<2.2e-16	NA	NA	NA	NA	NA	NA	0.68	<2.2e-16	0.43	<2.2e-16	0.58	<2.2e-16	NA	NA	0.38	<2.2e-16	0.48	<2.2e-16	0.05	0.0002	0.63	<2.2e-16	0	0.9	0.61	<2.2e-16	0.59	<2.2e-16	0.63	<2.2e-16	0.62	<2.2e-16	0.63	<2.2e-16	0.41	<2.2e-16
TAL1	K562	Transcript	lincRNA	0.78	<2.2e-16	0.71	<2.2e-16	NA	NA	0.6	<2.2e-16	0.71	<2.2e-16	NA	NA	NA	NA	NA	NA	0.59	<2.2e-16	0.61	<2.2e-16	0.72	<2.2e-16	NA	NA	0.55	<2.2e-16	0.65	<2.2e-16	0.04	2	0.62	<2.2e-16	-0.01	0.5	0.74	<2.2e-16	0.59	<2.2e-16	0.83	<2.2e-16	0.64	<2.2e-16	0.73	<2.2e-16	0.45	<2.2e-16
TBL1XR1-TBLR1	K562	Transcript	lincRNA	0.85	<2.2e-16	0.84	<2.2e-16	NA	NA	0.64	<2.2e-16	0.86	<2.2e-16	NA	NA	NA	NA	NA	NA	0.62	<2.2e-16	0.75	<2.2e-16	0.87	<2.2e-16	NA	NA	0.71	<2.2e-16	0.81	<2.2e-16	0.12	<2.2e-16	0.68	<2.2e-16	0.06	3e-06	0.82	<2.2e-16	0.56	<2.2e-16	0.91	<2.2e-16	0.74	<2.2e-16	0.88	<2.2e-16	0.51	<2.2e-16
TBP	K562	Transcript	lincRNA	0.73	<2.2e-16	0.72	<2.2e-16	NA	NA	0.7	<2.2e-16	0.67	<2.2e-16	NA	NA	NA	NA	NA	NA	0.73	<2.2e-16	0.54	<2.2e-16	0.79	<2.2e-16	NA	NA	0.49	<2.2e-16	0.62	<2.2e-16	0.07	2e-07	0.75	<2.2e-16	0.02	0.3	0.81	<2.2e-16	0.63	<2.2e-16	0.79	<2.2e-16	0.78	<2.2e-16	0.82	<2.2e-16	0.47	<2.2e-16
TEAD4	K562	Transcript	lincRNA	0.74	<2.2e-16	0.69	<2.2e-16	NA	NA	0.71	<2.2e-16	0.6	<2.2e-16	NA	NA	NA	NA	NA	NA	0.65	<2.2e-16	0.51	<2.2e-16	0.74	<2.2e-16	NA	NA	0.46	<2.2e-16	0.58	<2.2e-16	0.03	5	0.74	<2.2e-16	-0.01	0.7	0.76	<2.2e-16	0.71	<2.2e-16	0.79	<2.2e-16	0.67	<2.2e-16	0.69	<2.2e-16	0.49	<2.2e-16
THAP1	K562	Transcript	lincRNA	0.53	<2.2e-16	0.56	<2.2e-16	NA	NA	0.51	<2.2e-16	0.51	<2.2e-16	NA	NA	NA	NA	NA	NA	0.58	<2.2e-16	0.42	<2.2e-16	0.63	<2.2e-16	NA	NA	0.4	<2.2e-16	0.51	<2.2e-16	0.08	2e-10	0.62	<2.2e-16	0.04	2	0.62	<2.2e-16	0.45	<2.2e-16	0.61	<2.2e-16	0.6	<2.2e-16	0.65	<2.2e-16	0.43	<2.2e-16
TR4-NR2C2	K562	Transcript	lincRNA	0.51	<2.2e-16	0.55	<2.2e-16	NA	NA	0.25	<2.2e-16	0.61	<2.2e-16	NA	NA	NA	NA	NA	NA	0.23	<2.2e-16	0.65	<2.2e-16	0.47	<2.2e-16	NA	NA	0.62	<2.2e-16	0.66	<2.2e-16	0.08	2e-11	0.23	<2.2e-16	0.04	3	0.37	<2.2e-16	0.17	<2.2e-16	0.5	<2.2e-16	0.33	<2.2e-16	0.48	<2.2e-16	0.21	<2.2e-16
TRIM28	K562	Transcript	lincRNA	0.77	<2.2e-16	0.7	<2.2e-16	NA	NA	0.67	<2.2e-16	0.66	<2.2e-16	NA	NA	NA	NA	NA	NA	0.65	<2.2e-16	0.59	<2.2e-16	0.75	<2.2e-16	NA	NA	0.51	<2.2e-16	0.65	<2.2e-16	0.15	<2.2e-16	0.85	<2.2e-16	0.12	<2.2e-16	0.73	<2.2e-16	0.75	<2.2e-16	0.79	<2.2e-16	0.81	<2.2e-16	0.75	<2.2e-16	0.67	<2.2e-16
UBTF	K562	Transcript	lincRNA	0.76	<2.2e-16	0.73	<2.2e-16	NA	NA	0.64	<2.2e-16	0.71	<2.2e-16	NA	NA	NA	NA	NA	NA	0.66	<2.2e-16	0.58	<2.2e-16	0.84	<2.2e-16	NA	NA	0.53	<2.2e-16	0.67	<2.2e-16	0.12	<2.2e-16	0.72	<2.2e-16	0.07	3e-08	0.86	<2.2e-16	0.58	<2.2e-16	0.83	<2.2e-16	0.8	<2.2e-16	0.82	<2.2e-16	0.53	<2.2e-16
USF1	K562	Transcript	lincRNA	0.49	<2.2e-16	0.49	<2.2e-16	NA	NA	0.44	<2.2e-16	0.46	<2.2e-16	NA	NA	NA	NA	NA	NA	0.42	<2.2e-16	0.4	<2.2e-16	0.62	<2.2e-16	NA	NA	0.36	<2.2e-16	0.45	<2.2e-16	0.06	8e-07	0.5	<2.2e-16	0.03	0.02	0.53	<2.2e-16	0.41	<2.2e-16	0.54	<2.2e-16	0.48	<2.2e-16	0.53	<2.2e-16	0.35	<2.2e-16
USF2	K562	Transcript	lincRNA	0.76	<2.2e-16	0.77	<2.2e-16	NA	NA	0.49	<2.2e-16	0.82	<2.2e-16	NA	NA	NA	NA	NA	NA	0.46	<2.2e-16	0.81	<2.2e-16	0.75	<2.2e-16	NA	NA	0.75	<2.2e-16	0.83	<2.2e-16	0.12	<2.2e-16	0.5	<2.2e-16	0.07	8e-08	0.63	<2.2e-16	0.42	<2.2e-16	0.76	<2.2e-16	0.59	<2.2e-16	0.74	<2.2e-16	0.41	<2.2e-16
WHSC1-NSD2	K562	Transcript	lincRNA	0.59	<2.2e-16	0.6	<2.2e-16	NA	NA	0.48	<2.2e-16	0.57	<2.2e-16	NA	NA	NA	NA	NA	NA	0.43	<2.2e-16	0.54	<2.2e-16	0.66	<2.2e-16	NA	NA	0.51	<2.2e-16	0.61	<2.2e-16	0.2	<2.2e-16	0.62	<2.2e-16	0.17	<2.2e-16	0.59	<2.2e-16	0.5	<2.2e-16	0.67	<2.2e-16	0.72	<2.2e-16	0.65	<2.2e-16	0.7	<2.2e-16
XRCC4	K562	Transcript	lincRNA	0.67	<2.2e-16	0.7	<2.2e-16	NA	NA	0.45	<2.2e-16	0.73	<2.2e-16	NA	NA	NA	NA	NA	NA	0.42	<2.2e-16	0.73	<2.2e-16	0.66	<2.2e-16	NA	NA	0.68	<2.2e-16	0.76	<2.2e-16	0.13	<2.2e-16	0.44	<2.2e-16	0.08	4e-11	0.55	<2.2e-16	0.39	<2.2e-16	0.68	<2.2e-16	0.53	<2.2e-16	0.65	<2.2e-16	0.39	<2.2e-16
YY1	K562	Transcript	lincRNA	0.58	<2.2e-16	0.58	<2.2e-16	NA	NA	0.57	<2.2e-16	0.51	<2.2e-16	NA	NA	NA	NA	NA	NA	0.64	<2.2e-16	0.37	<2.2e-16	0.66	<2.2e-16	NA	NA	0.33	<2.2e-16	0.46	<2.2e-16	0.04	3	0.69	<2.2e-16	-0.01	0.5	0.72	<2.2e-16	0.55	<2.2e-16	0.66	<2.2e-16	0.7	<2.2e-16	0.68	<2.2e-16	0.41	<2.2e-16
ZBTB33	K562	Transcript	lincRNA	0.07	2e-08	0.06	4e-06	NA	NA	0.18	<2.2e-16	0.01	0.3	NA	NA	NA	NA	NA	NA	0.25	<2.2e-16	-0.01	0.4	0.11	<2.2e-16	NA	NA	-0.04	4	0.01	0.4	0.2	<2.2e-16	0.38	<2.2e-16	0.21	<2.2e-16	0.13	<2.2e-16	0.29	<2.2e-16	0.08	3e-10	0.36	<2.2e-16	0.19	<2.2e-16	0.44	<2.2e-16
ZBTB7A	K562	Transcript	lincRNA	0.51	<2.2e-16	0.54	<2.2e-16	NA	NA	0.53	<2.2e-16	0.48	<2.2e-16	NA	NA	NA	NA	NA	NA	0.53	<2.2e-16	0.34	<2.2e-16	0.67	<2.2e-16	NA	NA	0.31	<2.2e-16	0.44	<2.2e-16	0.05	5e-05	0.64	<2.2e-16	0	1	0.77	<2.2e-16	0.44	<2.2e-16	0.68	<2.2e-16	0.64	<2.2e-16	0.66	<2.2e-16	0.5	<2.2e-16
ZC3H11A	K562	Transcript	lincRNA	0.88	<2.2e-16	0.85	<2.2e-16	NA	NA	0.62	<2.2e-16	0.88	<2.2e-16	NA	NA	NA	NA	NA	NA	0.56	<2.2e-16	0.8	<2.2e-16	0.84	<2.2e-16	NA	NA	0.74	<2.2e-16	0.84	<2.2e-16	0.11	<2.2e-16	0.62	<2.2e-16	0.06	3e-06	0.77	<2.2e-16	0.54	<2.2e-16	0.87	<2.2e-16	0.69	<2.2e-16	0.82	<2.2e-16	0.48	<2.2e-16
ZMIZ1	K562	Transcript	lincRNA	0.87	<2.2e-16	0.84	<2.2e-16	NA	NA	0.69	<2.2e-16	0.84	<2.2e-16	NA	NA	NA	NA	NA	NA	0.67	<2.2e-16	0.72	<2.2e-16	0.87	<2.2e-16	NA	NA	0.67	<2.2e-16	0.79	<2.2e-16	0.1	8e-15	0.71	<2.2e-16	0.04	0.0008	0.86	<2.2e-16	0.62	<2.2e-16	0.92	<2.2e-16	0.77	<2.2e-16	0.87	<2.2e-16	0.52	<2.2e-16
ZNF143	K562	Transcript	lincRNA	0.81	<2.2e-16	0.79	<2.2e-16	NA	NA	0.63	<2.2e-16	0.79	<2.2e-16	NA	NA	NA	NA	NA	NA	0.59	<2.2e-16	0.68	<2.2e-16	0.81	<2.2e-16	NA	NA	0.63	<2.2e-16	0.74	<2.2e-16	0.08	8e-11	0.68	<2.2e-16	0.03	0.04	0.75	<2.2e-16	0.54	<2.2e-16	0.82	<2.2e-16	0.67	<2.2e-16	0.8	<2.2e-16	0.48	<2.2e-16
ZNF263	K562	Transcript	lincRNA	0.44	<2.2e-16	0.53	<2.2e-16	NA	NA	0.37	<2.2e-16	0.48	<2.2e-16	NA	NA	NA	NA	NA	NA	0.36	<2.2e-16	0.43	<2.2e-16	0.62	<2.2e-16	NA	NA	0.45	<2.2e-16	0.54	<2.2e-16	0.19	<2.2e-16	0.44	<2.2e-16	0.13	<2.2e-16	0.57	<2.2e-16	0.3	<2.2e-16	0.63	<2.2e-16	0.51	<2.2e-16	0.61	<2.2e-16	0.41	<2.2e-16
ZNF274	K562	Transcript	lincRNA	0.41	<2.2e-16	0.47	<2.2e-16	NA	NA	0.14	<2.2e-16	0.52	<2.2e-16	NA	NA	NA	NA	NA	NA	0.11	<2.2e-16	0.63	<2.2e-16	0.33	<2.2e-16	NA	NA	0.59	<2.2e-16	0.6	<2.2e-16	0.09	2e-12	0.08	4e-11	0.04	0.0005	0.21	<2.2e-16	0.08	5e-11	0.36	<2.2e-16	0.21	<2.2e-16	0.34	<2.2e-16	0.11	<2.2e-16
ZNF384	K562	Transcript	lincRNA	0.84	<2.2e-16	0.78	<2.2e-16	NA	NA	0.64	<2.2e-16	0.78	<2.2e-16	NA	NA	NA	NA	NA	NA	0.58	<2.2e-16	0.72	<2.2e-16	0.81	<2.2e-16	NA	NA	0.65	<2.2e-16	0.77	<2.2e-16	0.09	2e-14	0.68	<2.2e-16	0.05	0.0002	0.76	<2.2e-16	0.58	<2.2e-16	0.83	<2.2e-16	0.69	<2.2e-16	0.79	<2.2e-16	0.51	<2.2e-16
DNASE HYPERSENSITIVITY	K562	Transcript	lincRNA	0.67	<2.2e-16	0.73	<2.2e-16	NA	NA	0.62	<2.2e-16	0.63	<2.2e-16	NA	NA	NA	NA	NA	NA	0.59	<2.2e-16	0.49	<2.2e-16	0.82	<2.2e-16	NA	NA	0.47	<2.2e-16	0.6	<2.2e-16	0.14	<2.2e-16	0.73	<2.2e-16	0.08	2e-10	0.84	<2.2e-16	0.56	<2.2e-16	0.81	<2.2e-16	0.73	<2.2e-16	0.8	<2.2e-16	0.54	<2.2e-16
FOS (AND EGFP-FOS)	K562	Transcript	lincRNA	0.78	<2.2e-16	0.81	<2.2e-16	NA	NA	0.69	<2.2e-16	0.72	<2.2e-16	NA	NA	NA	NA	NA	NA	0.55	<2.2e-16	0.67	<2.2e-16	0.8	<2.2e-16	NA	NA	0.62	<2.2e-16	0.74	<2.2e-16	0.08	2e-11	0.65	<2.2e-16	0.04	4	0.74	<2.2e-16	0.56	<2.2e-16	0.8	<2.2e-16	0.64	<2.2e-16	0.76	<2.2e-16	0.46	<2.2e-16
JUND (AND EGFP-JUND)	K562	Transcript	lincRNA	0.83	<2.2e-16	0.84	<2.2e-16	NA	NA	0.81	<2.2e-16	0.73	<2.2e-16	NA	NA	NA	NA	NA	NA	0.61	<2.2e-16	0.65	<2.2e-16	0.86	<2.2e-16	NA	NA	0.59	<2.2e-16	0.72	<2.2e-16	0.08	2e-10	0.73	<2.2e-16	0.03	0.02	0.82	<2.2e-16	0.66	<2.2e-16	0.86	<2.2e-16	0.71	<2.2e-16	0.79	<2.2e-16	0.53	<2.2e-16
GATA2 (AND EGFP-GATA2)	K562	Transcript	lincRNA	0.29	<2.2e-16	0.23	<2.2e-16	NA	NA	0.33	<2.2e-16	0.15	<2.2e-16	NA	NA	NA	NA	NA	NA	0.29	<2.2e-16	0.14	<2.2e-16	0.25	<2.2e-16	NA	NA	0.1	3e-15	0.15	<2.2e-16	0.15	<2.2e-16	0.49	<2.2e-16	0.16	<2.2e-16	0.26	<2.2e-16	0.52	<2.2e-16	0.3	<2.2e-16	0.39	<2.2e-16	0.2	<2.2e-16	0.5	<2.2e-16
ARID3A	K562	TTS	lincRNA	NA	NA	0.85	<2.2e-16	NA	NA	0.66	<2.2e-16	0.86	<2.2e-16	NA	NA	NA	NA	NA	NA	0.59	<2.2e-16	0.81	<2.2e-16	0.78	<2.2e-16	NA	NA	0.74	<2.2e-16	0.82	<2.2e-16	0.07	2e-08	0.62	<2.2e-16	0.03	7	0.76	<2.2e-16	0.58	<2.2e-16	0.85	<2.2e-16	0.67	<2.2e-16	0.78	<2.2e-16	0.49	<2.2e-16
ATF1	K562	TTS	lincRNA	0.85	<2.2e-16	NA	NA	NA	NA	0.66	<2.2e-16	0.82	<2.2e-16	NA	NA	NA	NA	NA	NA	0.55	<2.2e-16	0.79	<2.2e-16	0.8	<2.2e-16	NA	NA	0.74	<2.2e-16	0.82	<2.2e-16	0.1	<2.2e-16	0.58	<2.2e-16	0.06	8e-06	0.75	<2.2e-16	0.54	<2.2e-16	0.84	<2.2e-16	0.67	<2.2e-16	0.79	<2.2e-16	0.47	<2.2e-16
ATF3	K562	TTS	lincRNA	0.66	<2.2e-16	0.66	<2.2e-16	NA	NA	NA	NA	0.53	<2.2e-16	NA	NA	NA	NA	NA	NA	0.58	<2.2e-16	0.52	<2.2e-16	0.65	<2.2e-16	NA	NA	0.43	<2.2e-16	0.53	<2.2e-16	0.04	3	0.67	<2.2e-16	0.02	0.05	0.65	<2.2e-16	0.68	<2.2e-16	0.67	<2.2e-16	0.55	<2.2e-16	0.6	<2.2e-16	0.44	<2.2e-16
BACH1	K562	TTS	lincRNA	0.86	<2.2e-16	0.82	<2.2e-16	NA	NA	0.53	<2.2e-16	NA	NA	NA	NA	NA	NA	NA	NA	0.52	<2.2e-16	0.83	<2.2e-16	0.73	<2.2e-16	NA	NA	0.79	<2.2e-16	0.83	<2.2e-16	0.09	6e-14	0.49	<2.2e-16	0.04	1	0.69	<2.2e-16	0.43	<2.2e-16	0.8	<2.2e-16	0.61	<2.2e-16	0.78	<2.2e-16	0.4	<2.2e-16
BCLAF1	K562	TTS	lincRNA	0.59	<2.2e-16	0.55	<2.2e-16	NA	NA	0.58	<2.2e-16	0.52	<2.2e-16	NA	NA	NA	NA	NA	NA	NA	NA	0.43	<2.2e-16	0.65	<2.2e-16	NA	NA	0.37	<2.2e-16	0.48	<2.2e-16	0.03	7	0.68	<2.2e-16	0.01	0.3	0.69	<2.2e-16	0.57	<2.2e-16	0.66	<2.2e-16	0.66	<2.2e-16	0.67	<2.2e-16	0.44	<2.2e-16
BDP1	K562	TTS	lincRNA	0.81	<2.2e-16	0.79	<2.2e-16	NA	NA	0.52	<2.2e-16	0.83	<2.2e-16	NA	NA	NA	NA	NA	NA	0.43	<2.2e-16	NA	NA	0.67	<2.2e-16	NA	NA	0.82	<2.2e-16	0.88	<2.2e-16	0.1	3e-15	0.45	<2.2e-16	0.05	5e-05	0.6	<2.2e-16	0.41	<2.2e-16	0.73	<2.2e-16	0.54	<2.2e-16	0.68	<2.2e-16	0.4	<2.2e-16
BHLHE40	K562	TTS	lincRNA	0.78	<2.2e-16	0.8	<2.2e-16	NA	NA	0.65	<2.2e-16	0.73	<2.2e-16	NA	NA	NA	NA	NA	NA	0.65	<2.2e-16	0.67	<2.2e-16	NA	NA	NA	NA	0.62	<2.2e-16	0.73	<2.2e-16	0.11	<2.2e-16	0.69	<2.2e-16	0.07	7e-08	0.85	<2.2e-16	0.57	<2.2e-16	0.85	<2.2e-16	0.73	<2.2e-16	0.83	<2.2e-16	0.52	<2.2e-16
BRF1	K562	TTS	lincRNA	0.74	<2.2e-16	0.74	<2.2e-16	NA	NA	0.43	<2.2e-16	0.79	<2.2e-16	NA	NA	NA	NA	NA	NA	0.37	<2.2e-16	0.82	<2.2e-16	0.62	<2.2e-16	NA	NA	NA	NA	0.82	<2.2e-16	0.11	<2.2e-16	0.37	<2.2e-16	0.06	8e-07	0.55	<2.2e-16	0.33	<2.2e-16	0.68	<2.2e-16	0.5	<2.2e-16	0.64	<2.2e-16	0.35	<2.2e-16
BRF2	K562	TTS	lincRNA	0.82	<2.2e-16	0.82	<2.2e-16	NA	NA	0.53	<2.2e-16	0.83	<2.2e-16	NA	NA	NA	NA	NA	NA	0.48	<2.2e-16	0.88	<2.2e-16	0.73	<2.2e-16	NA	NA	0.82	<2.2e-16	NA	NA	0.12	<2.2e-16	0.5	<2.2e-16	0.07	6e-08	0.66	<2.2e-16	0.43	<2.2e-16	0.79	<2.2e-16	0.6	<2.2e-16	0.75	<2.2e-16	0.44	<2.2e-16
CBX2	K562	TTS	lincRNA	0.07	2e-08	0.1	<2.2e-16	NA	NA	0.04	3	0.09	6e-14	NA	NA	NA	NA	NA	NA	0.03	7	0.1	3e-15	0.11	<2.2e-16	NA	NA	0.11	<2.2e-16	0.12	<2.2e-16	NA	NA	0.04	0.0005	0.93	<2.2e-16	0.04	3	0.06	7e-06	0.08	3e-11	0.21	<2.2e-16	0.09	7e-14	0.27	<2.2e-16
CBX3	K562	TTS	lincRNA	0.62	<2.2e-16	0.58	<2.2e-16	NA	NA	0.67	<2.2e-16	0.49	<2.2e-16	NA	NA	NA	NA	NA	NA	0.68	<2.2e-16	0.45	<2.2e-16	0.69	<2.2e-16	NA	NA	0.37	<2.2e-16	0.5	<2.2e-16	0.04	0.0005	NA	NA	0.03	0.02	0.68	<2.2e-16	0.73	<2.2e-16	0.7	<2.2e-16	0.72	<2.2e-16	0.66	<2.2e-16	0.61	<2.2e-16
CBX8	K562	TTS	lincRNA	0.03	7	0.06	8e-06	NA	NA	0.02	0.05	0.04	1	NA	NA	NA	NA	NA	NA	0.01	0.3	0.05	5e-05	0.07	7e-08	NA	NA	0.06	8e-07	0.07	6e-08	0.93	<2.2e-16	0.03	0.02	NA	NA	0.01	0.5	0.05	4e-05	0.04	3	0.19	<2.2e-16	0.05	0.0003	0.27	<2.2e-16
CCNT2	K562	TTS	lincRNA	0.76	<2.2e-16	0.75	<2.2e-16	NA	NA	0.65	<2.2e-16	0.69	<2.2e-16	NA	NA	NA	NA	NA	NA	0.69	<2.2e-16	0.6	<2.2e-16	0.85	<2.2e-16	NA	NA	0.55	<2.2e-16	0.66	<2.2e-16	0.04	3	0.68	<2.2e-16	0.01	0.5	NA	NA	0.57	<2.2e-16	0.87	<2.2e-16	0.74	<2.2e-16	0.84	<2.2e-16	0.51	<2.2e-16
CEBPB	K562	TTS	lincRNA	0.58	<2.2e-16	0.54	<2.2e-16	NA	NA	0.68	<2.2e-16	0.43	<2.2e-16	NA	NA	NA	NA	NA	NA	0.57	<2.2e-16	0.41	<2.2e-16	0.57	<2.2e-16	NA	NA	0.33	<2.2e-16	0.43	<2.2e-16	0.06	7e-06	0.73	<2.2e-16	0.05	4e-05	0.57	<2.2e-16	NA	NA	0.62	<2.2e-16	0.61	<2.2e-16	0.53	<2.2e-16	0.5	<2.2e-16
CEBPD	K562	TTS	lincRNA	0.85	<2.2e-16	0.84	<2.2e-16	NA	NA	0.67	<2.2e-16	0.8	<2.2e-16	NA	NA	NA	NA	NA	NA	0.66	<2.2e-16	0.73	<2.2e-16	0.85	<2.2e-16	NA	NA	0.68	<2.2e-16	0.79	<2.2e-16	0.08	3e-11	0.7	<2.2e-16	0.04	3	0.87	<2.2e-16	0.62	<2.2e-16	NA	NA	0.72	<2.2e-16	0.86	<2.2e-16	0.52	<2.2e-16
CHD1	K562	TTS	lincRNA	0.67	<2.2e-16	0.67	<2.2e-16	NA	NA	0.55	<2.2e-16	0.61	<2.2e-16	NA	NA	NA	NA	NA	NA	0.66	<2.2e-16	0.54	<2.2e-16	0.73	<2.2e-16	NA	NA	0.5	<2.2e-16	0.6	<2.2e-16	0.21	<2.2e-16	0.72	<2.2e-16	0.19	<2.2e-16	0.74	<2.2e-16	0.61	<2.2e-16	0.72	<2.2e-16	NA	NA	0.76	<2.2e-16	0.71	<2.2e-16
CHD2	K562	TTS	lincRNA	0.78	<2.2e-16	0.79	<2.2e-16	NA	NA	0.6	<2.2e-16	0.78	<2.2e-16	NA	NA	NA	NA	NA	NA	0.67	<2.2e-16	0.68	<2.2e-16	0.83	<2.2e-16	NA	NA	0.64	<2.2e-16	0.75	<2.2e-16	0.09	7e-14	0.66	<2.2e-16	0.05	0.0003	0.84	<2.2e-16	0.53	<2.2e-16	0.86	<2.2e-16	0.76	<2.2e-16	NA	NA	0.51	<2.2e-16
CHD4	K562	TTS	lincRNA	0.49	<2.2e-16	0.47	<2.2e-16	NA	NA	0.44	<2.2e-16	0.4	<2.2e-16	NA	NA	NA	NA	NA	NA	0.44	<2.2e-16	0.4	<2.2e-16	0.52	<2.2e-16	NA	NA	0.35	<2.2e-16	0.44	<2.2e-16	0.27	<2.2e-16	0.61	<2.2e-16	0.27	<2.2e-16	0.51	<2.2e-16	0.5	<2.2e-16	0.52	<2.2e-16	0.71	<2.2e-16	0.51	<2.2e-16	NA	NA
CHD7	K562	TTS	lincRNA	0.55	<2.2e-16	0.59	<2.2e-16	NA	NA	0.43	<2.2e-16	0.55	<2.2e-16	NA	NA	NA	NA	NA	NA	0.51	<2.2e-16	0.51	<2.2e-16	0.62	<2.2e-16	NA	NA	0.49	<2.2e-16	0.57	<2.2e-16	0.3	<2.2e-16	0.57	<2.2e-16	0.27	<2.2e-16	0.6	<2.2e-16	0.49	<2.2e-16	0.64	<2.2e-16	0.78	<2.2e-16	0.68	<2.2e-16	0.7	<2.2e-16
COREST-RCOR1	K562	TTS	lincRNA	0.87	<2.2e-16	0.87	<2.2e-16	NA	NA	0.64	<2.2e-16	0.85	<2.2e-16	NA	NA	NA	NA	NA	NA	0.59	<2.2e-16	0.8	<2.2e-16	0.86	<2.2e-16	NA	NA	0.76	<2.2e-16	0.85	<2.2e-16	0.12	<2.2e-16	0.65	<2.2e-16	0.06	2e-07	0.82	<2.2e-16	0.54	<2.2e-16	0.92	<2.2e-16	0.71	<2.2e-16	0.86	<2.2e-16	0.54	<2.2e-16
CREB1	K562	TTS	lincRNA	0.72	<2.2e-16	0.71	<2.2e-16	NA	NA	0.66	<2.2e-16	0.62	<2.2e-16	NA	NA	NA	NA	NA	NA	0.7	<2.2e-16	0.57	<2.2e-16	0.73	<2.2e-16	NA	NA	0.5	<2.2e-16	0.61	<2.2e-16	0.14	<2.2e-16	0.8	<2.2e-16	0.12	<2.2e-16	0.75	<2.2e-16	0.72	<2.2e-16	0.76	<2.2e-16	0.8	<2.2e-16	0.74	<2.2e-16	0.65	<2.2e-16
CREBBP	K562	TTS	lincRNA	0.4	<2.2e-16	0.45	<2.2e-16	NA	NA	0.26	<2.2e-16	0.44	<2.2e-16	NA	NA	NA	NA	NA	NA	0.29	<2.2e-16	0.42	<2.2e-16	0.38	<2.2e-16	NA	NA	0.42	<2.2e-16	0.43	<2.2e-16	0.27	<2.2e-16	0.32	<2.2e-16	0.25	<2.2e-16	0.32	<2.2e-16	0.3	<2.2e-16	0.38	<2.2e-16	0.54	<2.2e-16	0.41	<2.2e-16	0.54	<2.2e-16
CTCF	K562	TTS	lincRNA	0.39	<2.2e-16	0.36	<2.2e-16	NA	NA	0.3	<2.2e-16	0.36	<2.2e-16	NA	NA	NA	NA	NA	NA	0.3	<2.2e-16	0.33	<2.2e-16	0.41	<2.2e-16	NA	NA	0.3	<2.2e-16	0.38	<2.2e-16	0.08	1e-09	0.35	<2.2e-16	0.05	5e-05	0.35	<2.2e-16	0.26	<2.2e-16	0.4	<2.2e-16	0.31	<2.2e-16	0.4	<2.2e-16	0.25	<2.2e-16
CTCFL	K562	TTS	lincRNA	0.57	<2.2e-16	0.59	<2.2e-16	NA	NA	0.46	<2.2e-16	0.57	<2.2e-16	NA	NA	NA	NA	NA	NA	0.52	<2.2e-16	0.52	<2.2e-16	0.66	<2.2e-16	NA	NA	0.49	<2.2e-16	0.58	<2.2e-16	0.12	<2.2e-16	0.52	<2.2e-16	0.08	2e-11	0.65	<2.2e-16	0.39	<2.2e-16	0.66	<2.2e-16	0.58	<2.2e-16	0.67	<2.2e-16	0.41	<2.2e-16
CUX1	K562	TTS	lincRNA	0.92	<2.2e-16	0.88	<2.2e-16	NA	NA	0.6	<2.2e-16	0.89	<2.2e-16	NA	NA	NA	NA	NA	NA	0.54	<2.2e-16	0.85	<2.2e-16	0.78	<2.2e-16	NA	NA	0.79	<2.2e-16	0.86	<2.2e-16	0.09	2e-12	0.56	<2.2e-16	0.04	1	0.74	<2.2e-16	0.51	<2.2e-16	0.84	<2.2e-16	0.65	<2.2e-16	0.78	<2.2e-16	0.47	<2.2e-16
E2F4	K562	TTS	lincRNA	0.69	<2.2e-16	0.74	<2.2e-16	NA	NA	0.59	<2.2e-16	0.66	<2.2e-16	NA	NA	NA	NA	NA	NA	0.66	<2.2e-16	0.6	<2.2e-16	0.84	<2.2e-16	NA	NA	0.57	<2.2e-16	0.69	<2.2e-16	0.13	<2.2e-16	0.69	<2.2e-16	0.08	9e-11	0.85	<2.2e-16	0.51	<2.2e-16	0.83	<2.2e-16	0.76	<2.2e-16	0.86	<2.2e-16	0.53	<2.2e-16
E2F6	K562	TTS	lincRNA	0.61	<2.2e-16	0.63	<2.2e-16	NA	NA	0.57	<2.2e-16	0.56	<2.2e-16	NA	NA	NA	NA	NA	NA	0.65	<2.2e-16	0.49	<2.2e-16	0.81	<2.2e-16	NA	NA	0.44	<2.2e-16	0.56	<2.2e-16	0.08	3e-10	0.72	<2.2e-16	0.05	4e-05	0.81	<2.2e-16	0.51	<2.2e-16	0.73	<2.2e-16	0.71	<2.2e-16	0.77	<2.2e-16	0.49	<2.2e-16
EGFP-HDAC8	K562	TTS	lincRNA	0.5	<2.2e-16	0.55	<2.2e-16	NA	NA	0.47	<2.2e-16	0.45	<2.2e-16	NA	NA	NA	NA	NA	NA	0.45	<2.2e-16	0.43	<2.2e-16	0.65	<2.2e-16	NA	NA	0.41	<2.2e-16	0.52	<2.2e-16	0.11	<2.2e-16	0.55	<2.2e-16	0.08	4e-11	0.63	<2.2e-16	0.42	<2.2e-16	0.69	<2.2e-16	0.56	<2.2e-16	0.64	<2.2e-16	0.49	<2.2e-16
EGFP-JUNB	K562	TTS	lincRNA	0.64	<2.2e-16	0.67	<2.2e-16	NA	NA	0.7	<2.2e-16	0.53	<2.2e-16	NA	NA	NA	NA	NA	NA	0.52	<2.2e-16	0.51	<2.2e-16	0.72	<2.2e-16	NA	NA	0.46	<2.2e-16	0.58	<2.2e-16	0.09	4e-13	0.65	<2.2e-16	0.06	8e-07	0.7	<2.2e-16	0.55	<2.2e-16	0.75	<2.2e-16	0.59	<2.2e-16	0.66	<2.2e-16	0.48	<2.2e-16
EGFP-NR4A1	K562	TTS	lincRNA	0.17	<2.2e-16	0.31	<2.2e-16	NA	NA	0.2	<2.2e-16	0.21	<2.2e-16	NA	NA	NA	NA	NA	NA	0.19	<2.2e-16	0.23	<2.2e-16	0.38	<2.2e-16	NA	NA	0.24	<2.2e-16	0.32	<2.2e-16	0.13	<2.2e-16	0.26	<2.2e-16	0.08	9e-12	0.33	<2.2e-16	0.17	<2.2e-16	0.4	<2.2e-16	0.31	<2.2e-16	0.37	<2.2e-16	0.26	<2.2e-16
EGR1	K562	TTS	lincRNA	0.51	<2.2e-16	0.52	<2.2e-16	NA	NA	0.53	<2.2e-16	0.44	<2.2e-16	NA	NA	NA	NA	NA	NA	0.61	<2.2e-16	0.36	<2.2e-16	0.64	<2.2e-16	NA	NA	0.33	<2.2e-16	0.42	<2.2e-16	0.06	4e-06	0.62	<2.2e-16	0.04	0.0007	0.71	<2.2e-16	0.45	<2.2e-16	0.61	<2.2e-16	0.61	<2.2e-16	0.63	<2.2e-16	0.43	<2.2e-16
ELF1	K562	TTS	lincRNA	0.56	<2.2e-16	0.58	<2.2e-16	NA	NA	0.54	<2.2e-16	0.48	<2.2e-16	NA	NA	NA	NA	NA	NA	0.63	<2.2e-16	0.42	<2.2e-16	0.67	<2.2e-16	NA	NA	0.37	<2.2e-16	0.48	<2.2e-16	0.03	7	0.69	<2.2e-16	0.02	0.2	0.68	<2.2e-16	0.49	<2.2e-16	0.64	<2.2e-16	0.64	<2.2e-16	0.67	<2.2e-16	0.45	<2.2e-16
ELK1	K562	TTS	lincRNA	0.86	<2.2e-16	0.86	<2.2e-16	NA	NA	0.58	<2.2e-16	0.89	<2.2e-16	NA	NA	NA	NA	NA	NA	0.6	<2.2e-16	0.81	<2.2e-16	0.81	<2.2e-16	NA	NA	0.77	<2.2e-16	0.84	<2.2e-16	0.1	5e-16	0.58	<2.2e-16	0.05	0.0002	0.78	<2.2e-16	0.48	<2.2e-16	0.85	<2.2e-16	0.69	<2.2e-16	0.85	<2.2e-16	0.46	<2.2e-16
ETS1	K562	TTS	lincRNA	0.59	<2.2e-16	0.6	<2.2e-16	NA	NA	0.59	<2.2e-16	0.53	<2.2e-16	NA	NA	NA	NA	NA	NA	0.71	<2.2e-16	0.44	<2.2e-16	0.75	<2.2e-16	NA	NA	0.4	<2.2e-16	0.51	<2.2e-16	0.06	3e-06	0.72	<2.2e-16	0.04	5	0.81	<2.2e-16	0.52	<2.2e-16	0.72	<2.2e-16	0.73	<2.2e-16	0.76	<2.2e-16	0.49	<2.2e-16
EZH2	K562	TTS	lincRNA	0.32	<2.2e-16	0.38	<2.2e-16	NA	NA	0.2	<2.2e-16	0.37	<2.2e-16	NA	NA	NA	NA	NA	NA	0.19	<2.2e-16	0.34	<2.2e-16	0.34	<2.2e-16	NA	NA	0.36	<2.2e-16	0.38	<2.2e-16	0.74	<2.2e-16	0.22	<2.2e-16	0.69	<2.2e-16	0.24	<2.2e-16	0.23	<2.2e-16	0.35	<2.2e-16	0.42	<2.2e-16	0.34	<2.2e-16	0.4	<2.2e-16
FOSL1	K562	TTS	lincRNA	0.63	<2.2e-16	0.64	<2.2e-16	NA	NA	0.72	<2.2e-16	0.55	<2.2e-16	NA	NA	NA	NA	NA	NA	0.51	<2.2e-16	0.53	<2.2e-16	0.65	<2.2e-16	NA	NA	0.47	<2.2e-16	0.56	<2.2e-16	0.06	3e-07	0.61	<2.2e-16	0.04	2	0.62	<2.2e-16	0.52	<2.2e-16	0.68	<2.2e-16	0.54	<2.2e-16	0.59	<2.2e-16	0.46	<2.2e-16
GABP	K562	TTS	lincRNA	0.46	<2.2e-16	0.48	<2.2e-16	NA	NA	0.46	<2.2e-16	0.38	<2.2e-16	NA	NA	NA	NA	NA	NA	0.55	<2.2e-16	0.33	<2.2e-16	0.55	<2.2e-16	NA	NA	0.28	<2.2e-16	0.37	<2.2e-16	0.01	0.4	0.56	<2.2e-16	0	0.9	0.58	<2.2e-16	0.44	<2.2e-16	0.57	<2.2e-16	0.49	<2.2e-16	0.52	<2.2e-16	0.33	<2.2e-16
GATA1	K562	TTS	lincRNA	0.9	<2.2e-16	0.87	<2.2e-16	NA	NA	0.64	<2.2e-16	0.83	<2.2e-16	NA	NA	NA	NA	NA	NA	0.57	<2.2e-16	0.81	<2.2e-16	0.81	<2.2e-16	NA	NA	0.74	<2.2e-16	0.83	<2.2e-16	0.09	4e-14	0.61	<2.2e-16	0.05	3e-05	0.8	<2.2e-16	0.58	<2.2e-16	0.89	<2.2e-16	0.67	<2.2e-16	0.79	<2.2e-16	0.51	<2.2e-16
GTF2B	K562	TTS	lincRNA	0.81	<2.2e-16	0.81	<2.2e-16	NA	NA	0.59	<2.2e-16	0.81	<2.2e-16	NA	NA	NA	NA	NA	NA	0.64	<2.2e-16	0.74	<2.2e-16	0.79	<2.2e-16	NA	NA	0.69	<2.2e-16	0.79	<2.2e-16	0.07	8e-08	0.61	<2.2e-16	0.02	0.2	0.78	<2.2e-16	0.51	<2.2e-16	0.84	<2.2e-16	0.7	<2.2e-16	0.83	<2.2e-16	0.44	<2.2e-16
GTF2F1	K562	TTS	lincRNA	0.83	<2.2e-16	0.85	<2.2e-16	NA	NA	0.56	<2.2e-16	0.87	<2.2e-16	NA	NA	NA	NA	NA	NA	0.61	<2.2e-16	0.79	<2.2e-16	0.82	<2.2e-16	NA	NA	0.76	<2.2e-16	0.83	<2.2e-16	0.11	<2.2e-16	0.59	<2.2e-16	0.05	2e-05	0.78	<2.2e-16	0.48	<2.2e-16	0.85	<2.2e-16	0.72	<2.2e-16	0.87	<2.2e-16	0.45	<2.2e-16
GTF3C2	K562	TTS	lincRNA	0.73	<2.2e-16	0.72	<2.2e-16	NA	NA	0.63	<2.2e-16	0.66	<2.2e-16	NA	NA	NA	NA	NA	NA	0.6	<2.2e-16	0.66	<2.2e-16	0.78	<2.2e-16	NA	NA	0.59	<2.2e-16	0.71	<2.2e-16	0.1	3e-16	0.68	<2.2e-16	0.06	2e-07	0.76	<2.2e-16	0.53	<2.2e-16	0.79	<2.2e-16	0.69	<2.2e-16	0.77	<2.2e-16	0.55	<2.2e-16
H2AZ	K562	TTS	lincRNA	0.68	<2.2e-16	0.62	<2.2e-16	NA	NA	0.58	<2.2e-16	0.56	<2.2e-16	NA	NA	NA	NA	NA	NA	0.55	<2.2e-16	0.53	<2.2e-16	0.68	<2.2e-16	NA	NA	0.46	<2.2e-16	0.57	<2.2e-16	0.14	<2.2e-16	0.76	<2.2e-16	0.13	<2.2e-16	0.64	<2.2e-16	0.6	<2.2e-16	0.67	<2.2e-16	0.7	<2.2e-16	0.65	<2.2e-16	0.63	<2.2e-16
H3K27AC	K562	TTS	lincRNA	0.63	<2.2e-16	0.59	<2.2e-16	NA	NA	0.62	<2.2e-16	0.49	<2.2e-16	NA	NA	NA	NA	NA	NA	0.69	<2.2e-16	0.42	<2.2e-16	0.68	<2.2e-16	NA	NA	0.35	<2.2e-16	0.48	<2.2e-16	0.03	0.04	0.81	<2.2e-16	0.02	0.2	0.71	<2.2e-16	0.73	<2.2e-16	0.68	<2.2e-16	0.8	<2.2e-16	0.67	<2.2e-16	0.57	<2.2e-16
H3K27ME3	K562	TTS	lincRNA	0.01	0.5	0.16	<2.2e-16	NA	NA	-0.04	2	0.14	<2.2e-16	NA	NA	NA	NA	NA	NA	-0.06	3e-06	0.12	<2.2e-16	0.12	<2.2e-16	NA	NA	0.18	<2.2e-16	0.17	<2.2e-16	0.54	<2.2e-16	-0.09	3e-13	0.46	<2.2e-16	0.01	0.4	-0.08	3e-10	0.12	<2.2e-16	0.07	2e-08	0.13	<2.2e-16	0	0.8
H3K36ME3	K562	TTS	lincRNA	0.48	<2.2e-16	0.39	<2.2e-16	NA	NA	0.31	<2.2e-16	0.45	<2.2e-16	NA	NA	NA	NA	NA	NA	0.37	<2.2e-16	0.45	<2.2e-16	0.39	<2.2e-16	NA	NA	0.4	<2.2e-16	0.45	<2.2e-16	0.03	6	0.38	<2.2e-16	0.04	2	0.39	<2.2e-16	0.36	<2.2e-16	0.46	<2.2e-16	0.5	<2.2e-16	0.46	<2.2e-16	0.45	<2.2e-16
H3K4ME1	K562	TTS	lincRNA	0.68	<2.2e-16	0.62	<2.2e-16	NA	NA	0.56	<2.2e-16	0.54	<2.2e-16	NA	NA	NA	NA	NA	NA	0.42	<2.2e-16	0.56	<2.2e-16	0.65	<2.2e-16	NA	NA	0.49	<2.2e-16	0.6	<2.2e-16	0.1	3e-15	0.67	<2.2e-16	0.09	8e-13	0.6	<2.2e-16	0.59	<2.2e-16	0.71	<2.2e-16	0.61	<2.2e-16	0.57	<2.2e-16	0.66	<2.2e-16
H3K4ME2	K562	TTS	lincRNA	0.63	<2.2e-16	0.61	<2.2e-16	NA	NA	0.59	<2.2e-16	0.51	<2.2e-16	NA	NA	NA	NA	NA	NA	0.69	<2.2e-16	0.44	<2.2e-16	0.73	<2.2e-16	NA	NA	0.38	<2.2e-16	0.51	<2.2e-16	0.08	3e-10	0.79	<2.2e-16	0.07	5e-08	0.76	<2.2e-16	0.63	<2.2e-16	0.7	<2.2e-16	0.84	<2.2e-16	0.73	<2.2e-16	0.58	<2.2e-16
H3K4ME3	K562	TTS	lincRNA	0.63	<2.2e-16	0.59	<2.2e-16	NA	NA	0.57	<2.2e-16	0.52	<2.2e-16	NA	NA	NA	NA	NA	NA	0.69	<2.2e-16	0.44	<2.2e-16	0.7	<2.2e-16	NA	NA	0.38	<2.2e-16	0.5	<2.2e-16	0.08	5e-11	0.76	<2.2e-16	0.07	7e-09	0.75	<2.2e-16	0.62	<2.2e-16	0.67	<2.2e-16	0.85	<2.2e-16	0.72	<2.2e-16	0.56	<2.2e-16
H3K79ME2	K562	TTS	lincRNA	0.51	<2.2e-16	0.45	<2.2e-16	NA	NA	0.39	<2.2e-16	0.42	<2.2e-16	NA	NA	NA	NA	NA	NA	0.54	<2.2e-16	0.35	<2.2e-16	0.53	<2.2e-16	NA	NA	0.3	<2.2e-16	0.41	<2.2e-16	0.01	0.5	0.52	<2.2e-16	0	0.9	0.57	<2.2e-16	0.44	<2.2e-16	0.54	<2.2e-16	0.71	<2.2e-16	0.59	<2.2e-16	0.42	<2.2e-16
H3K9AC	K562	TTS	lincRNA	0.63	<2.2e-16	0.59	<2.2e-16	NA	NA	0.59	<2.2e-16	0.51	<2.2e-16	NA	NA	NA	NA	NA	NA	0.71	<2.2e-16	0.43	<2.2e-16	0.7	<2.2e-16	NA	NA	0.36	<2.2e-16	0.49	<2.2e-16	0.04	0.0003	0.78	<2.2e-16	0.03	6	0.74	<2.2e-16	0.68	<2.2e-16	0.68	<2.2e-16	0.85	<2.2e-16	0.71	<2.2e-16	0.56	<2.2e-16
H3K9ME1	K562	TTS	lincRNA	0.51	<2.2e-16	0.56	<2.2e-16	NA	NA	0.34	<2.2e-16	0.54	<2.2e-16	NA	NA	NA	NA	NA	NA	0.31	<2.2e-16	0.55	<2.2e-16	0.51	<2.2e-16	NA	NA	0.55	<2.2e-16	0.59	<2.2e-16	0.38	<2.2e-16	0.39	<2.2e-16	0.34	<2.2e-16	0.41	<2.2e-16	0.36	<2.2e-16	0.56	<2.2e-16	0.59	<2.2e-16	0.53	<2.2e-16	0.59	<2.2e-16
H3K9ME3	K562	TTS	lincRNA	0.32	<2.2e-16	0.3	<2.2e-16	NA	NA	0.16	<2.2e-16	0.35	<2.2e-16	NA	NA	NA	NA	NA	NA	0.14	<2.2e-16	0.35	<2.2e-16	0.21	<2.2e-16	NA	NA	0.31	<2.2e-16	0.31	<2.2e-16	0.1	5e-16	0.27	<2.2e-16	0.1	5e-16	0.17	<2.2e-16	0.18	<2.2e-16	0.2	<2.2e-16	0.3	<2.2e-16	0.23	<2.2e-16	0.33	<2.2e-16
H4K20ME1	K562	TTS	lincRNA	0.29	<2.2e-16	0.39	<2.2e-16	NA	NA	0.2	<2.2e-16	0.37	<2.2e-16	NA	NA	NA	NA	NA	NA	0.24	<2.2e-16	0.34	<2.2e-16	0.39	<2.2e-16	NA	NA	0.36	<2.2e-16	0.39	<2.2e-16	0.48	<2.2e-16	0.2	<2.2e-16	0.42	<2.2e-16	0.3	<2.2e-16	0.2	<2.2e-16	0.41	<2.2e-16	0.49	<2.2e-16	0.43	<2.2e-16	0.4	<2.2e-16
HCFC1	K562	TTS	lincRNA	0.77	<2.2e-16	0.8	<2.2e-16	NA	NA	0.63	<2.2e-16	0.73	<2.2e-16	NA	NA	NA	NA	NA	NA	0.7	<2.2e-16	0.66	<2.2e-16	0.83	<2.2e-16	NA	NA	0.61	<2.2e-16	0.72	<2.2e-16	0.08	2e-11	0.69	<2.2e-16	0.04	0.0007	0.83	<2.2e-16	0.55	<2.2e-16	0.83	<2.2e-16	0.75	<2.2e-16	0.86	<2.2e-16	0.5	<2.2e-16
HDAC1	K562	TTS	lincRNA	0.63	<2.2e-16	0.68	<2.2e-16	NA	NA	0.55	<2.2e-16	0.58	<2.2e-16	NA	NA	NA	NA	NA	NA	0.6	<2.2e-16	0.53	<2.2e-16	0.77	<2.2e-16	NA	NA	0.5	<2.2e-16	0.61	<2.2e-16	0.24	<2.2e-16	0.73	<2.2e-16	0.22	<2.2e-16	0.75	<2.2e-16	0.58	<2.2e-16	0.73	<2.2e-16	0.88	<2.2e-16	0.76	<2.2e-16	0.74	<2.2e-16
HDAC2	K562	TTS	lincRNA	0.58	<2.2e-16	0.63	<2.2e-16	NA	NA	0.5	<2.2e-16	0.55	<2.2e-16	NA	NA	NA	NA	NA	NA	0.51	<2.2e-16	0.51	<2.2e-16	0.72	<2.2e-16	NA	NA	0.49	<2.2e-16	0.59	<2.2e-16	0.28	<2.2e-16	0.67	<2.2e-16	0.25	<2.2e-16	0.69	<2.2e-16	0.52	<2.2e-16	0.71	<2.2e-16	0.79	<2.2e-16	0.71	<2.2e-16	0.74	<2.2e-16
HDAC6	K562	TTS	lincRNA	0.46	<2.2e-16	0.55	<2.2e-16	NA	NA	0.37	<2.2e-16	0.51	<2.2e-16	NA	NA	NA	NA	NA	NA	0.43	<2.2e-16	0.48	<2.2e-16	0.58	<2.2e-16	NA	NA	0.48	<2.2e-16	0.54	<2.2e-16	0.36	<2.2e-16	0.48	<2.2e-16	0.32	<2.2e-16	0.52	<2.2e-16	0.39	<2.2e-16	0.57	<2.2e-16	0.72	<2.2e-16	0.61	<2.2e-16	0.65	<2.2e-16
HMGN3	K562	TTS	lincRNA	0.71	<2.2e-16	0.74	<2.2e-16	NA	NA	0.6	<2.2e-16	0.69	<2.2e-16	NA	NA	NA	NA	NA	NA	0.64	<2.2e-16	0.6	<2.2e-16	0.84	<2.2e-16	NA	NA	0.57	<2.2e-16	0.68	<2.2e-16	0.11	<2.2e-16	0.65	<2.2e-16	0.07	6e-08	0.92	<2.2e-16	0.5	<2.2e-16	0.87	<2.2e-16	0.73	<2.2e-16	0.86	<2.2e-16	0.52	<2.2e-16
IRF1	K562	TTS	lincRNA	0.83	<2.2e-16	0.8	<2.2e-16	NA	NA	0.53	<2.2e-16	0.84	<2.2e-16	NA	NA	NA	NA	NA	NA	0.49	<2.2e-16	0.79	<2.2e-16	0.7	<2.2e-16	NA	NA	0.75	<2.2e-16	0.79	<2.2e-16	0.02	0.2	0.47	<2.2e-16	-0.04	4	0.66	<2.2e-16	0.44	<2.2e-16	0.78	<2.2e-16	0.53	<2.2e-16	0.72	<2.2e-16	0.3	<2.2e-16
JARID1B-PLU1	K562	TTS	lincRNA	0.58	<2.2e-16	0.61	<2.2e-16	NA	NA	0.56	<2.2e-16	0.52	<2.2e-16	NA	NA	NA	NA	NA	NA	0.72	<2.2e-16	0.44	<2.2e-16	0.72	<2.2e-16	NA	NA	0.4	<2.2e-16	0.52	<2.2e-16	0.17	<2.2e-16	0.77	<2.2e-16	0.14	<2.2e-16	0.77	<2.2e-16	0.62	<2.2e-16	0.7	<2.2e-16	0.89	<2.2e-16	0.75	<2.2e-16	0.64	<2.2e-16
JUN	K562	TTS	lincRNA	0.88	<2.2e-16	0.89	<2.2e-16	NA	NA	0.76	<2.2e-16	0.81	<2.2e-16	NA	NA	NA	NA	NA	NA	0.62	<2.2e-16	0.77	<2.2e-16	0.86	<2.2e-16	NA	NA	0.7	<2.2e-16	0.81	<2.2e-16	0.08	5e-12	0.7	<2.2e-16	0.05	0.0002	0.83	<2.2e-16	0.61	<2.2e-16	0.88	<2.2e-16	0.72	<2.2e-16	0.83	<2.2e-16	0.54	<2.2e-16
KAP1	K562	TTS	lincRNA	0.74	<2.2e-16	0.63	<2.2e-16	NA	NA	0.42	<2.2e-16	0.75	<2.2e-16	NA	NA	NA	NA	NA	NA	0.41	<2.2e-16	0.68	<2.2e-16	0.53	<2.2e-16	NA	NA	0.62	<2.2e-16	0.64	<2.2e-16	-0.05	0.0003	0.43	<2.2e-16	-0.07	8e-09	0.52	<2.2e-16	0.34	<2.2e-16	0.59	<2.2e-16	0.43	<2.2e-16	0.57	<2.2e-16	0.27	<2.2e-16
KAT2B-PCAF	K562	TTS	lincRNA	0.48	<2.2e-16	0.52	<2.2e-16	NA	NA	0.37	<2.2e-16	0.48	<2.2e-16	NA	NA	NA	NA	NA	NA	0.41	<2.2e-16	0.45	<2.2e-16	0.49	<2.2e-16	NA	NA	0.44	<2.2e-16	0.48	<2.2e-16	0.35	<2.2e-16	0.48	<2.2e-16	0.33	<2.2e-16	0.45	<2.2e-16	0.41	<2.2e-16	0.48	<2.2e-16	0.69	<2.2e-16	0.5	<2.2e-16	0.7	<2.2e-16
KDM1A-LSD1	K562	TTS	lincRNA	0.6	<2.2e-16	0.59	<2.2e-16	NA	NA	0.53	<2.2e-16	0.49	<2.2e-16	NA	NA	NA	NA	NA	NA	0.45	<2.2e-16	0.49	<2.2e-16	0.63	<2.2e-16	NA	NA	0.44	<2.2e-16	0.53	<2.2e-16	0.25	<2.2e-16	0.66	<2.2e-16	0.24	<2.2e-16	0.6	<2.2e-16	0.59	<2.2e-16	0.64	<2.2e-16	0.73	<2.2e-16	0.56	<2.2e-16	0.79	<2.2e-16
MAFF	K562	TTS	lincRNA	0.82	<2.2e-16	0.78	<2.2e-16	NA	NA	0.57	<2.2e-16	0.84	<2.2e-16	NA	NA	NA	NA	NA	NA	0.49	<2.2e-16	0.77	<2.2e-16	0.7	<2.2e-16	NA	NA	0.71	<2.2e-16	0.77	<2.2e-16	0.07	8e-08	0.5	<2.2e-16	0.03	0.03	0.64	<2.2e-16	0.5	<2.2e-16	0.75	<2.2e-16	0.57	<2.2e-16	0.71	<2.2e-16	0.39	<2.2e-16
MAFK	K562	TTS	lincRNA	0.86	<2.2e-16	0.83	<2.2e-16	NA	NA	0.62	<2.2e-16	0.87	<2.2e-16	NA	NA	NA	NA	NA	NA	0.53	<2.2e-16	0.8	<2.2e-16	0.78	<2.2e-16	NA	NA	0.75	<2.2e-16	0.81	<2.2e-16	0.08	3e-11	0.57	<2.2e-16	0.04	0.0008	0.72	<2.2e-16	0.52	<2.2e-16	0.82	<2.2e-16	0.62	<2.2e-16	0.76	<2.2e-16	0.46	<2.2e-16
MAX	K562	TTS	lincRNA	0.74	<2.2e-16	0.76	<2.2e-16	NA	NA	0.67	<2.2e-16	0.66	<2.2e-16	NA	NA	NA	NA	NA	NA	0.7	<2.2e-16	0.59	<2.2e-16	0.9	<2.2e-16	NA	NA	0.54	<2.2e-16	0.67	<2.2e-16	0.07	2e-07	0.77	<2.2e-16	0.04	3	0.87	<2.2e-16	0.61	<2.2e-16	0.83	<2.2e-16	0.76	<2.2e-16	0.83	<2.2e-16	0.54	<2.2e-16
MAZ	K562	TTS	lincRNA	0.76	<2.2e-16	0.78	<2.2e-16	NA	NA	0.66	<2.2e-16	0.7	<2.2e-16	NA	NA	NA	NA	NA	NA	0.69	<2.2e-16	0.62	<2.2e-16	0.87	<2.2e-16	NA	NA	0.58	<2.2e-16	0.69	<2.2e-16	0.09	2e-12	0.73	<2.2e-16	0.05	4e-05	0.91	<2.2e-16	0.57	<2.2e-16	0.86	<2.2e-16	0.77	<2.2e-16	0.87	<2.2e-16	0.56	<2.2e-16
MEF2A	K562	TTS	lincRNA	0.71	<2.2e-16	0.65	<2.2e-16	NA	NA	0.62	<2.2e-16	0.61	<2.2e-16	NA	NA	NA	NA	NA	NA	0.6	<2.2e-16	0.58	<2.2e-16	0.64	<2.2e-16	NA	NA	0.51	<2.2e-16	0.6	<2.2e-16	0.07	8e-08	0.62	<2.2e-16	0.04	2	0.64	<2.2e-16	0.59	<2.2e-16	0.69	<2.2e-16	0.59	<2.2e-16	0.64	<2.2e-16	0.44	<2.2e-16
MXI1	K562	TTS	lincRNA	0.84	<2.2e-16	0.82	<2.2e-16	NA	NA	0.6	<2.2e-16	0.84	<2.2e-16	NA	NA	NA	NA	NA	NA	0.65	<2.2e-16	0.75	<2.2e-16	0.81	<2.2e-16	NA	NA	0.7	<2.2e-16	0.78	<2.2e-16	0.05	3e-05	0.6	<2.2e-16	0.01	0.5	0.8	<2.2e-16	0.51	<2.2e-16	0.83	<2.2e-16	0.71	<2.2e-16	0.85	<2.2e-16	0.45	<2.2e-16
MYC	K562	TTS	lincRNA	0.79	<2.2e-16	0.77	<2.2e-16	NA	NA	0.65	<2.2e-16	0.72	<2.2e-16	NA	NA	NA	NA	NA	NA	0.71	<2.2e-16	0.65	<2.2e-16	0.85	<2.2e-16	NA	NA	0.59	<2.2e-16	0.7	<2.2e-16	0.09	2e-12	0.76	<2.2e-16	0.06	4e-06	0.84	<2.2e-16	0.62	<2.2e-16	0.83	<2.2e-16	0.81	<2.2e-16	0.83	<2.2e-16	0.59	<2.2e-16
NCOR1	K562	TTS	lincRNA	0.4	<2.2e-16	0.38	<2.2e-16	NA	NA	0.37	<2.2e-16	0.32	<2.2e-16	NA	NA	NA	NA	NA	NA	0.39	<2.2e-16	0.3	<2.2e-16	0.43	<2.2e-16	NA	NA	0.27	<2.2e-16	0.34	<2.2e-16	0.33	<2.2e-16	0.51	<2.2e-16	0.34	<2.2e-16	0.4	<2.2e-16	0.45	<2.2e-16	0.39	<2.2e-16	0.65	<2.2e-16	0.39	<2.2e-16	0.73	<2.2e-16
NFE2	K562	TTS	lincRNA	0.68	<2.2e-16	0.74	<2.2e-16	NA	NA	0.49	<2.2e-16	0.74	<2.2e-16	NA	NA	NA	NA	NA	NA	0.44	<2.2e-16	0.72	<2.2e-16	0.72	<2.2e-16	NA	NA	0.69	<2.2e-16	0.77	<2.2e-16	0.16	<2.2e-16	0.48	<2.2e-16	0.1	5e-16	0.65	<2.2e-16	0.4	<2.2e-16	0.74	<2.2e-16	0.59	<2.2e-16	0.74	<2.2e-16	0.42	<2.2e-16
NFYA	K562	TTS	lincRNA	0.78	<2.2e-16	0.79	<2.2e-16	NA	NA	0.55	<2.2e-16	0.77	<2.2e-16	NA	NA	NA	NA	NA	NA	0.52	<2.2e-16	0.72	<2.2e-16	0.75	<2.2e-16	NA	NA	0.68	<2.2e-16	0.76	<2.2e-16	0.06	5e-07	0.54	<2.2e-16	0.01	0.3	0.73	<2.2e-16	0.46	<2.2e-16	0.8	<2.2e-16	0.6	<2.2e-16	0.78	<2.2e-16	0.41	<2.2e-16
NFYB	K562	TTS	lincRNA	0.4	<2.2e-16	0.46	<2.2e-16	NA	NA	0.34	<2.2e-16	0.39	<2.2e-16	NA	NA	NA	NA	NA	NA	0.36	<2.2e-16	0.35	<2.2e-16	0.49	<2.2e-16	NA	NA	0.33	<2.2e-16	0.41	<2.2e-16	0.05	8e-05	0.4	<2.2e-16	0.02	0.07	0.48	<2.2e-16	0.3	<2.2e-16	0.49	<2.2e-16	0.41	<2.2e-16	0.54	<2.2e-16	0.27	<2.2e-16
NR2F2	K562	TTS	lincRNA	0.67	<2.2e-16	0.62	<2.2e-16	NA	NA	0.69	<2.2e-16	0.52	<2.2e-16	NA	NA	NA	NA	NA	NA	0.68	<2.2e-16	0.48	<2.2e-16	0.69	<2.2e-16	NA	NA	0.4	<2.2e-16	0.52	<2.2e-16	0.05	0.0002	0.87	<2.2e-16	0.03	6	0.71	<2.2e-16	0.78	<2.2e-16	0.74	<2.2e-16	0.71	<2.2e-16	0.65	<2.2e-16	0.6	<2.2e-16
NRF1	K562	TTS	lincRNA	0.78	<2.2e-16	0.75	<2.2e-16	NA	NA	0.45	<2.2e-16	0.83	<2.2e-16	NA	NA	NA	NA	NA	NA	0.44	<2.2e-16	0.79	<2.2e-16	0.64	<2.2e-16	NA	NA	0.74	<2.2e-16	0.77	<2.2e-16	0.05	0.0002	0.39	<2.2e-16	0	1	0.59	<2.2e-16	0.35	<2.2e-16	0.69	<2.2e-16	0.5	<2.2e-16	0.67	<2.2e-16	0.27	<2.2e-16
P300	K562	TTS	lincRNA	0.83	<2.2e-16	0.76	<2.2e-16	NA	NA	0.49	<2.2e-16	0.85	<2.2e-16	NA	NA	NA	NA	NA	NA	0.46	<2.2e-16	0.77	<2.2e-16	0.65	<2.2e-16	NA	NA	0.73	<2.2e-16	0.74	<2.2e-16	0.02	0.2	0.42	<2.2e-16	-0.02	0.07	0.62	<2.2e-16	0.4	<2.2e-16	0.71	<2.2e-16	0.5	<2.2e-16	0.67	<2.2e-16	0.3	<2.2e-16
PHF8	K562	TTS	lincRNA	0.49	<2.2e-16	0.5	<2.2e-16	NA	NA	0.47	<2.2e-16	0.42	<2.2e-16	NA	NA	NA	NA	NA	NA	0.66	<2.2e-16	0.33	<2.2e-16	0.62	<2.2e-16	NA	NA	0.29	<2.2e-16	0.4	<2.2e-16	0.08	6e-11	0.69	<2.2e-16	0.07	4e-08	0.7	<2.2e-16	0.52	<2.2e-16	0.58	<2.2e-16	0.78	<2.2e-16	0.66	<2.2e-16	0.48	<2.2e-16
PML	K562	TTS	lincRNA	0.63	<2.2e-16	0.6	<2.2e-16	NA	NA	0.64	<2.2e-16	0.51	<2.2e-16	NA	NA	NA	NA	NA	NA	0.76	<2.2e-16	0.44	<2.2e-16	0.65	<2.2e-16	NA	NA	0.36	<2.2e-16	0.48	<2.2e-16	0.02	0.2	0.69	<2.2e-16	0	0.8	0.73	<2.2e-16	0.69	<2.2e-16	0.72	<2.2e-16	0.67	<2.2e-16	0.67	<2.2e-16	0.44	<2.2e-16
POL2	K562	TTS	lincRNA	0.54	<2.2e-16	0.53	<2.2e-16	NA	NA	0.53	<2.2e-16	0.48	<2.2e-16	NA	NA	NA	NA	NA	NA	0.77	<2.2e-16	0.37	<2.2e-16	0.63	<2.2e-16	NA	NA	0.32	<2.2e-16	0.44	<2.2e-16	0	0.8	0.67	<2.2e-16	-0.02	0.08	0.74	<2.2e-16	0.56	<2.2e-16	0.67	<2.2e-16	0.72	<2.2e-16	0.73	<2.2e-16	0.41	<2.2e-16
POL3	K562	TTS	lincRNA	0.53	<2.2e-16	0.56	<2.2e-16	NA	NA	0.36	<2.2e-16	0.55	<2.2e-16	NA	NA	NA	NA	NA	NA	0.3	<2.2e-16	0.61	<2.2e-16	0.48	<2.2e-16	NA	NA	0.58	<2.2e-16	0.62	<2.2e-16	0.07	2e-09	0.3	<2.2e-16	0.03	0.02	0.41	<2.2e-16	0.28	<2.2e-16	0.53	<2.2e-16	0.36	<2.2e-16	0.49	<2.2e-16	0.23	<2.2e-16
RAD21	K562	TTS	lincRNA	0.68	<2.2e-16	0.65	<2.2e-16	NA	NA	0.47	<2.2e-16	0.66	<2.2e-16	NA	NA	NA	NA	NA	NA	0.42	<2.2e-16	0.66	<2.2e-16	0.6	<2.2e-16	NA	NA	0.61	<2.2e-16	0.68	<2.2e-16	0.11	<2.2e-16	0.45	<2.2e-16	0.07	2e-08	0.52	<2.2e-16	0.39	<2.2e-16	0.63	<2.2e-16	0.47	<2.2e-16	0.62	<2.2e-16	0.36	<2.2e-16
RBBP5	K562	TTS	lincRNA	0.65	<2.2e-16	0.66	<2.2e-16	NA	NA	0.58	<2.2e-16	0.57	<2.2e-16	NA	NA	NA	NA	NA	NA	0.67	<2.2e-16	0.51	<2.2e-16	0.76	<2.2e-16	NA	NA	0.46	<2.2e-16	0.58	<2.2e-16	0.18	<2.2e-16	0.76	<2.2e-16	0.16	<2.2e-16	0.79	<2.2e-16	0.61	<2.2e-16	0.74	<2.2e-16	0.9	<2.2e-16	0.77	<2.2e-16	0.68	<2.2e-16
RDBP-NELF-E	K562	TTS	lincRNA	0.67	<2.2e-16	0.72	<2.2e-16	NA	NA	0.41	<2.2e-16	0.74	<2.2e-16	NA	NA	NA	NA	NA	NA	0.44	<2.2e-16	0.74	<2.2e-16	0.64	<2.2e-16	NA	NA	0.71	<2.2e-16	0.76	<2.2e-16	0.12	<2.2e-16	0.4	<2.2e-16	0.06	8e-07	0.6	<2.2e-16	0.32	<2.2e-16	0.68	<2.2e-16	0.56	<2.2e-16	0.7	<2.2e-16	0.35	<2.2e-16
REST	K562	TTS	lincRNA	0.58	<2.2e-16	0.57	<2.2e-16	NA	NA	0.59	<2.2e-16	0.47	<2.2e-16	NA	NA	NA	NA	NA	NA	0.6	<2.2e-16	0.42	<2.2e-16	0.65	<2.2e-16	NA	NA	0.37	<2.2e-16	0.47	<2.2e-16	0.03	0.04	0.65	<2.2e-16	0.01	0.6	0.69	<2.2e-16	0.54	<2.2e-16	0.66	<2.2e-16	0.6	<2.2e-16	0.61	<2.2e-16	0.43	<2.2e-16
RFX5	K562	TTS	lincRNA	0.83	<2.2e-16	0.78	<2.2e-16	NA	NA	0.5	<2.2e-16	0.87	<2.2e-16	NA	NA	NA	NA	NA	NA	0.49	<2.2e-16	0.78	<2.2e-16	0.68	<2.2e-16	NA	NA	0.75	<2.2e-16	0.77	<2.2e-16	0.06	4e-06	0.45	<2.2e-16	0.01	0.4	0.65	<2.2e-16	0.4	<2.2e-16	0.73	<2.2e-16	0.56	<2.2e-16	0.73	<2.2e-16	0.34	<2.2e-16
RNF2	K562	TTS	lincRNA	0.18	<2.2e-16	0.2	<2.2e-16	NA	NA	0.17	<2.2e-16	0.16	<2.2e-16	NA	NA	NA	NA	NA	NA	0.2	<2.2e-16	0.15	<2.2e-16	0.25	<2.2e-16	NA	NA	0.14	<2.2e-16	0.18	<2.2e-16	0.85	<2.2e-16	0.29	<2.2e-16	0.85	<2.2e-16	0.21	<2.2e-16	0.26	<2.2e-16	0.21	<2.2e-16	0.43	<2.2e-16	0.22	<2.2e-16	0.51	<2.2e-16
RPC155	K562	TTS	lincRNA	0.78	<2.2e-16	0.75	<2.2e-16	NA	NA	0.54	<2.2e-16	0.78	<2.2e-16	NA	NA	NA	NA	NA	NA	0.48	<2.2e-16	0.81	<2.2e-16	0.69	<2.2e-16	NA	NA	0.74	<2.2e-16	0.81	<2.2e-16	0.11	<2.2e-16	0.5	<2.2e-16	0.07	5e-08	0.62	<2.2e-16	0.44	<2.2e-16	0.73	<2.2e-16	0.57	<2.2e-16	0.7	<2.2e-16	0.45	<2.2e-16
SAP30	K562	TTS	lincRNA	0.61	<2.2e-16	0.65	<2.2e-16	NA	NA	0.49	<2.2e-16	0.58	<2.2e-16	NA	NA	NA	NA	NA	NA	0.61	<2.2e-16	0.52	<2.2e-16	0.71	<2.2e-16	NA	NA	0.48	<2.2e-16	0.58	<2.2e-16	0.21	<2.2e-16	0.67	<2.2e-16	0.19	<2.2e-16	0.7	<2.2e-16	0.54	<2.2e-16	0.66	<2.2e-16	0.87	<2.2e-16	0.72	<2.2e-16	0.67	<2.2e-16
SETDB1	K562	TTS	lincRNA	0.48	<2.2e-16	0.58	<2.2e-16	NA	NA	0.39	<2.2e-16	0.51	<2.2e-16	NA	NA	NA	NA	NA	NA	0.42	<2.2e-16	0.49	<2.2e-16	0.59	<2.2e-16	NA	NA	0.49	<2.2e-16	0.55	<2.2e-16	0.32	<2.2e-16	0.51	<2.2e-16	0.28	<2.2e-16	0.53	<2.2e-16	0.42	<2.2e-16	0.58	<2.2e-16	0.73	<2.2e-16	0.61	<2.2e-16	0.67	<2.2e-16
SIN3AK20	K562	TTS	lincRNA	0.6	<2.2e-16	0.61	<2.2e-16	NA	NA	0.55	<2.2e-16	0.54	<2.2e-16	NA	NA	NA	NA	NA	NA	0.73	<2.2e-16	0.45	<2.2e-16	0.74	<2.2e-16	NA	NA	0.39	<2.2e-16	0.52	<2.2e-16	0.03	9	0.68	<2.2e-16	0.01	0.5	0.78	<2.2e-16	0.53	<2.2e-16	0.69	<2.2e-16	0.75	<2.2e-16	0.76	<2.2e-16	0.45	<2.2e-16
SIRT6	K562	TTS	lincRNA	0.89	<2.2e-16	0.83	<2.2e-16	NA	NA	0.63	<2.2e-16	0.82	<2.2e-16	NA	NA	NA	NA	NA	NA	0.55	<2.2e-16	0.85	<2.2e-16	0.78	<2.2e-16	NA	NA	0.75	<2.2e-16	0.86	<2.2e-16	0.1	8e-15	0.61	<2.2e-16	0.06	6e-07	0.72	<2.2e-16	0.56	<2.2e-16	0.81	<2.2e-16	0.65	<2.2e-16	0.75	<2.2e-16	0.5	<2.2e-16
SIX5	K562	TTS	lincRNA	0.42	<2.2e-16	0.45	<2.2e-16	NA	NA	0.39	<2.2e-16	0.37	<2.2e-16	NA	NA	NA	NA	NA	NA	0.46	<2.2e-16	0.33	<2.2e-16	0.49	<2.2e-16	NA	NA	0.28	<2.2e-16	0.36	<2.2e-16	0.04	2	0.43	<2.2e-16	0.02	0.2	0.47	<2.2e-16	0.38	<2.2e-16	0.46	<2.2e-16	0.46	<2.2e-16	0.5	<2.2e-16	0.28	<2.2e-16
SMARCA4-BRG1	K562	TTS	lincRNA	0.89	<2.2e-16	0.78	<2.2e-16	NA	NA	0.62	<2.2e-16	0.82	<2.2e-16	NA	NA	NA	NA	NA	NA	0.65	<2.2e-16	0.76	<2.2e-16	0.77	<2.2e-16	NA	NA	0.68	<2.2e-16	0.77	<2.2e-16	0.04	4	0.63	<2.2e-16	0.01	0.5	0.79	<2.2e-16	0.56	<2.2e-16	0.85	<2.2e-16	0.7	<2.2e-16	0.81	<2.2e-16	0.51	<2.2e-16
SMARCB1-INI1	K562	TTS	lincRNA	0.9	<2.2e-16	0.8	<2.2e-16	NA	NA	0.61	<2.2e-16	0.85	<2.2e-16	NA	NA	NA	NA	NA	NA	0.63	<2.2e-16	0.79	<2.2e-16	0.77	<2.2e-16	NA	NA	0.71	<2.2e-16	0.8	<2.2e-16	0.06	8e-07	0.61	<2.2e-16	0.03	0.02	0.78	<2.2e-16	0.55	<2.2e-16	0.85	<2.2e-16	0.69	<2.2e-16	0.81	<2.2e-16	0.5	<2.2e-16
SMC3	K562	TTS	lincRNA	0.7	<2.2e-16	0.7	<2.2e-16	NA	NA	0.5	<2.2e-16	0.71	<2.2e-16	NA	NA	NA	NA	NA	NA	0.49	<2.2e-16	0.65	<2.2e-16	0.71	<2.2e-16	NA	NA	0.62	<2.2e-16	0.7	<2.2e-16	0.13	<2.2e-16	0.52	<2.2e-16	0.07	4e-09	0.65	<2.2e-16	0.41	<2.2e-16	0.73	<2.2e-16	0.56	<2.2e-16	0.73	<2.2e-16	0.41	<2.2e-16
SP1	K562	TTS	lincRNA	0.58	<2.2e-16	0.58	<2.2e-16	NA	NA	0.59	<2.2e-16	0.48	<2.2e-16	NA	NA	NA	NA	NA	NA	0.65	<2.2e-16	0.41	<2.2e-16	0.67	<2.2e-16	NA	NA	0.35	<2.2e-16	0.47	<2.2e-16	0.04	2	0.67	<2.2e-16	0.02	0.08	0.71	<2.2e-16	0.58	<2.2e-16	0.65	<2.2e-16	0.64	<2.2e-16	0.7	<2.2e-16	0.45	<2.2e-16
SP2	K562	TTS	lincRNA	0.49	<2.2e-16	0.55	<2.2e-16	NA	NA	0.4	<2.2e-16	0.5	<2.2e-16	NA	NA	NA	NA	NA	NA	0.38	<2.2e-16	0.5	<2.2e-16	0.54	<2.2e-16	NA	NA	0.47	<2.2e-16	0.55	<2.2e-16	0.13	<2.2e-16	0.42	<2.2e-16	0.09	3e-14	0.5	<2.2e-16	0.34	<2.2e-16	0.56	<2.2e-16	0.51	<2.2e-16	0.58	<2.2e-16	0.4	<2.2e-16
SPI1-PU1	K562	TTS	lincRNA	0.19	<2.2e-16	0.17	<2.2e-16	NA	NA	0.26	<2.2e-16	0.08	9e-10	NA	NA	NA	NA	NA	NA	0.27	<2.2e-16	0.09	2e-14	0.23	<2.2e-16	NA	NA	0.05	0.0001	0.11	<2.2e-16	0.18	<2.2e-16	0.46	<2.2e-16	0.2	<2.2e-16	0.21	<2.2e-16	0.43	<2.2e-16	0.19	<2.2e-16	0.43	<2.2e-16	0.2	<2.2e-16	0.51	<2.2e-16
SRF	K562	TTS	lincRNA	0.67	<2.2e-16	0.69	<2.2e-16	NA	NA	0.61	<2.2e-16	0.6	<2.2e-16	NA	NA	NA	NA	NA	NA	0.59	<2.2e-16	0.57	<2.2e-16	0.68	<2.2e-16	NA	NA	0.5	<2.2e-16	0.61	<2.2e-16	0.06	7e-06	0.62	<2.2e-16	0.03	0.02	0.66	<2.2e-16	0.52	<2.2e-16	0.71	<2.2e-16	0.6	<2.2e-16	0.68	<2.2e-16	0.43	<2.2e-16
STAT1	K562	TTS	lincRNA	0.85	<2.2e-16	0.84	<2.2e-16	NA	NA	0.61	<2.2e-16	0.82	<2.2e-16	NA	NA	NA	NA	NA	NA	0.58	<2.2e-16	0.81	<2.2e-16	0.8	<2.2e-16	NA	NA	0.75	<2.2e-16	0.84	<2.2e-16	0.09	2e-13	0.61	<2.2e-16	0.04	0.0005	0.75	<2.2e-16	0.53	<2.2e-16	0.85	<2.2e-16	0.67	<2.2e-16	0.81	<2.2e-16	0.47	<2.2e-16
STAT2	K562	TTS	lincRNA	0.81	<2.2e-16	0.83	<2.2e-16	NA	NA	0.64	<2.2e-16	0.77	<2.2e-16	NA	NA	NA	NA	NA	NA	0.61	<2.2e-16	0.76	<2.2e-16	0.83	<2.2e-16	NA	NA	0.7	<2.2e-16	0.81	<2.2e-16	0.1	<2.2e-16	0.66	<2.2e-16	0.05	4e-05	0.79	<2.2e-16	0.57	<2.2e-16	0.87	<2.2e-16	0.71	<2.2e-16	0.83	<2.2e-16	0.51	<2.2e-16
STAT5A	K562	TTS	lincRNA	0.54	<2.2e-16	0.48	<2.2e-16	NA	NA	0.53	<2.2e-16	0.39	<2.2e-16	NA	NA	NA	NA	NA	NA	0.5	<2.2e-16	0.39	<2.2e-16	0.48	<2.2e-16	NA	NA	0.32	<2.2e-16	0.4	<2.2e-16	0.12	<2.2e-16	0.65	<2.2e-16	0.12	<2.2e-16	0.5	<2.2e-16	0.68	<2.2e-16	0.55	<2.2e-16	0.6	<2.2e-16	0.44	<2.2e-16	0.57	<2.2e-16
SUZ12	K562	TTS	lincRNA	0.13	<2.2e-16	0.2	<2.2e-16	NA	NA	0.12	<2.2e-16	0.16	<2.2e-16	NA	NA	NA	NA	NA	NA	0.14	<2.2e-16	0.13	<2.2e-16	0.23	<2.2e-16	NA	NA	0.15	<2.2e-16	0.18	<2.2e-16	0.67	<2.2e-16	0.19	<2.2e-16	0.64	<2.2e-16	0.17	<2.2e-16	0.17	<2.2e-16	0.21	<2.2e-16	0.38	<2.2e-16	0.23	<2.2e-16	0.41	<2.2e-16
TAF1	K562	TTS	lincRNA	0.59	<2.2e-16	0.58	<2.2e-16	NA	NA	0.56	<2.2e-16	0.5	<2.2e-16	NA	NA	NA	NA	NA	NA	0.72	<2.2e-16	0.4	<2.2e-16	0.68	<2.2e-16	NA	NA	0.35	<2.2e-16	0.47	<2.2e-16	0.01	0.6	0.67	<2.2e-16	-0.01	0.6	0.76	<2.2e-16	0.55	<2.2e-16	0.67	<2.2e-16	0.74	<2.2e-16	0.72	<2.2e-16	0.4	<2.2e-16
TAF7	K562	TTS	lincRNA	0.63	<2.2e-16	0.59	<2.2e-16	NA	NA	0.61	<2.2e-16	0.55	<2.2e-16	NA	NA	NA	NA	NA	NA	0.72	<2.2e-16	0.49	<2.2e-16	0.64	<2.2e-16	NA	NA	0.43	<2.2e-16	0.53	<2.2e-16	0.05	5e-05	0.65	<2.2e-16	0.03	0.03	0.66	<2.2e-16	0.61	<2.2e-16	0.67	<2.2e-16	0.66	<2.2e-16	0.67	<2.2e-16	0.45	<2.2e-16
TAL1	K562	TTS	lincRNA	0.76	<2.2e-16	0.7	<2.2e-16	NA	NA	0.59	<2.2e-16	0.65	<2.2e-16	NA	NA	NA	NA	NA	NA	0.57	<2.2e-16	0.6	<2.2e-16	0.69	<2.2e-16	NA	NA	0.54	<2.2e-16	0.62	<2.2e-16	0.03	6	0.6	<2.2e-16	0.01	0.5	0.73	<2.2e-16	0.6	<2.2e-16	0.82	<2.2e-16	0.59	<2.2e-16	0.68	<2.2e-16	0.46	<2.2e-16
TBL1XR1-TBLR1	K562	TTS	lincRNA	0.86	<2.2e-16	0.87	<2.2e-16	NA	NA	0.63	<2.2e-16	0.87	<2.2e-16	NA	NA	NA	NA	NA	NA	0.63	<2.2e-16	0.8	<2.2e-16	0.86	<2.2e-16	NA	NA	0.76	<2.2e-16	0.85	<2.2e-16	0.13	<2.2e-16	0.64	<2.2e-16	0.07	2e-08	0.83	<2.2e-16	0.53	<2.2e-16	0.91	<2.2e-16	0.74	<2.2e-16	0.9	<2.2e-16	0.52	<2.2e-16
TBP	K562	TTS	lincRNA	0.73	<2.2e-16	0.72	<2.2e-16	NA	NA	0.68	<2.2e-16	0.66	<2.2e-16	NA	NA	NA	NA	NA	NA	0.76	<2.2e-16	0.59	<2.2e-16	0.8	<2.2e-16	NA	NA	0.53	<2.2e-16	0.63	<2.2e-16	0.06	5e-06	0.73	<2.2e-16	0.03	0.03	0.81	<2.2e-16	0.62	<2.2e-16	0.78	<2.2e-16	0.78	<2.2e-16	0.82	<2.2e-16	0.48	<2.2e-16
TEAD4	K562	TTS	lincRNA	0.73	<2.2e-16	0.69	<2.2e-16	NA	NA	0.72	<2.2e-16	0.57	<2.2e-16	NA	NA	NA	NA	NA	NA	0.66	<2.2e-16	0.54	<2.2e-16	0.72	<2.2e-16	NA	NA	0.46	<2.2e-16	0.57	<2.2e-16	0.01	0.4	0.73	<2.2e-16	0	1	0.77	<2.2e-16	0.71	<2.2e-16	0.8	<2.2e-16	0.63	<2.2e-16	0.66	<2.2e-16	0.5	<2.2e-16
THAP1	K562	TTS	lincRNA	0.56	<2.2e-16	0.59	<2.2e-16	NA	NA	0.54	<2.2e-16	0.53	<2.2e-16	NA	NA	NA	NA	NA	NA	0.62	<2.2e-16	0.47	<2.2e-16	0.68	<2.2e-16	NA	NA	0.43	<2.2e-16	0.53	<2.2e-16	0.07	6e-09	0.62	<2.2e-16	0.04	0.0004	0.68	<2.2e-16	0.45	<2.2e-16	0.65	<2.2e-16	0.64	<2.2e-16	0.71	<2.2e-16	0.45	<2.2e-16
TR4-NR2C2	K562	TTS	lincRNA	0.57	<2.2e-16	0.63	<2.2e-16	NA	NA	0.29	<2.2e-16	0.69	<2.2e-16	NA	NA	NA	NA	NA	NA	0.25	<2.2e-16	0.71	<2.2e-16	0.51	<2.2e-16	NA	NA	0.7	<2.2e-16	0.72	<2.2e-16	0.1	<2.2e-16	0.25	<2.2e-16	0.04	2	0.43	<2.2e-16	0.2	<2.2e-16	0.57	<2.2e-16	0.39	<2.2e-16	0.56	<2.2e-16	0.25	<2.2e-16
TRIM28	K562	TTS	lincRNA	0.76	<2.2e-16	0.68	<2.2e-16	NA	NA	0.67	<2.2e-16	0.64	<2.2e-16	NA	NA	NA	NA	NA	NA	0.69	<2.2e-16	0.61	<2.2e-16	0.73	<2.2e-16	NA	NA	0.53	<2.2e-16	0.65	<2.2e-16	0.15	<2.2e-16	0.85	<2.2e-16	0.14	<2.2e-16	0.74	<2.2e-16	0.76	<2.2e-16	0.79	<2.2e-16	0.8	<2.2e-16	0.73	<2.2e-16	0.69	<2.2e-16
UBTF	K562	TTS	lincRNA	0.78	<2.2e-16	0.76	<2.2e-16	NA	NA	0.62	<2.2e-16	0.72	<2.2e-16	NA	NA	NA	NA	NA	NA	0.69	<2.2e-16	0.64	<2.2e-16	0.84	<2.2e-16	NA	NA	0.6	<2.2e-16	0.7	<2.2e-16	0.13	<2.2e-16	0.69	<2.2e-16	0.09	2e-13	0.88	<2.2e-16	0.54	<2.2e-16	0.84	<2.2e-16	0.81	<2.2e-16	0.84	<2.2e-16	0.54	<2.2e-16
USF1	K562	TTS	lincRNA	0.51	<2.2e-16	0.51	<2.2e-16	NA	NA	0.46	<2.2e-16	0.44	<2.2e-16	NA	NA	NA	NA	NA	NA	0.49	<2.2e-16	0.41	<2.2e-16	0.66	<2.2e-16	NA	NA	0.36	<2.2e-16	0.46	<2.2e-16	0.05	0.0003	0.53	<2.2e-16	0.03	0.03	0.57	<2.2e-16	0.43	<2.2e-16	0.56	<2.2e-16	0.5	<2.2e-16	0.55	<2.2e-16	0.36	<2.2e-16
USF2	K562	TTS	lincRNA	0.78	<2.2e-16	0.81	<2.2e-16	NA	NA	0.49	<2.2e-16	0.84	<2.2e-16	NA	NA	NA	NA	NA	NA	0.48	<2.2e-16	0.84	<2.2e-16	0.75	<2.2e-16	NA	NA	0.8	<2.2e-16	0.87	<2.2e-16	0.12	<2.2e-16	0.48	<2.2e-16	0.06	2e-07	0.66	<2.2e-16	0.4	<2.2e-16	0.78	<2.2e-16	0.61	<2.2e-16	0.77	<2.2e-16	0.41	<2.2e-16
WHSC1-NSD2	K562	TTS	lincRNA	0.6	<2.2e-16	0.62	<2.2e-16	NA	NA	0.47	<2.2e-16	0.56	<2.2e-16	NA	NA	NA	NA	NA	NA	0.47	<2.2e-16	0.56	<2.2e-16	0.66	<2.2e-16	NA	NA	0.53	<2.2e-16	0.62	<2.2e-16	0.2	<2.2e-16	0.61	<2.2e-16	0.17	<2.2e-16	0.62	<2.2e-16	0.51	<2.2e-16	0.7	<2.2e-16	0.75	<2.2e-16	0.67	<2.2e-16	0.73	<2.2e-16
XRCC4	K562	TTS	lincRNA	0.72	<2.2e-16	0.74	<2.2e-16	NA	NA	0.46	<2.2e-16	0.77	<2.2e-16	NA	NA	NA	NA	NA	NA	0.44	<2.2e-16	0.79	<2.2e-16	0.67	<2.2e-16	NA	NA	0.75	<2.2e-16	0.82	<2.2e-16	0.15	<2.2e-16	0.44	<2.2e-16	0.09	2e-14	0.59	<2.2e-16	0.38	<2.2e-16	0.72	<2.2e-16	0.56	<2.2e-16	0.71	<2.2e-16	0.4	<2.2e-16
YY1	K562	TTS	lincRNA	0.54	<2.2e-16	0.54	<2.2e-16	NA	NA	0.53	<2.2e-16	0.46	<2.2e-16	NA	NA	NA	NA	NA	NA	0.66	<2.2e-16	0.37	<2.2e-16	0.64	<2.2e-16	NA	NA	0.32	<2.2e-16	0.44	<2.2e-16	0.02	0.05	0.64	<2.2e-16	0.01	0.5	0.68	<2.2e-16	0.49	<2.2e-16	0.61	<2.2e-16	0.67	<2.2e-16	0.66	<2.2e-16	0.4	<2.2e-16
ZBTB33	K562	TTS	lincRNA	0.08	4e-11	0.07	2e-09	NA	NA	0.19	<2.2e-16	0.01	0.6	NA	NA	NA	NA	NA	NA	0.27	<2.2e-16	0	0.9	0.15	<2.2e-16	NA	NA	-0.04	3	0.03	0.04	0.2	<2.2e-16	0.4	<2.2e-16	0.22	<2.2e-16	0.14	<2.2e-16	0.38	<2.2e-16	0.09	2e-13	0.41	<2.2e-16	0.2	<2.2e-16	0.48	<2.2e-16
ZBTB7A	K562	TTS	lincRNA	0.53	<2.2e-16	0.54	<2.2e-16	NA	NA	0.53	<2.2e-16	0.48	<2.2e-16	NA	NA	NA	NA	NA	NA	0.61	<2.2e-16	0.38	<2.2e-16	0.7	<2.2e-16	NA	NA	0.36	<2.2e-16	0.46	<2.2e-16	0.05	3e-05	0.65	<2.2e-16	0.03	7	0.8	<2.2e-16	0.44	<2.2e-16	0.68	<2.2e-16	0.67	<2.2e-16	0.7	<2.2e-16	0.51	<2.2e-16
ZC3H11A	K562	TTS	lincRNA	0.9	<2.2e-16	0.88	<2.2e-16	NA	NA	0.61	<2.2e-16	0.9	<2.2e-16	NA	NA	NA	NA	NA	NA	0.57	<2.2e-16	0.84	<2.2e-16	0.82	<2.2e-16	NA	NA	0.79	<2.2e-16	0.87	<2.2e-16	0.1	5e-16	0.59	<2.2e-16	0.05	3e-05	0.78	<2.2e-16	0.5	<2.2e-16	0.87	<2.2e-16	0.68	<2.2e-16	0.84	<2.2e-16	0.48	<2.2e-16
ZMIZ1	K562	TTS	lincRNA	0.89	<2.2e-16	0.87	<2.2e-16	NA	NA	0.68	<2.2e-16	0.85	<2.2e-16	NA	NA	NA	NA	NA	NA	0.68	<2.2e-16	0.79	<2.2e-16	0.86	<2.2e-16	NA	NA	0.73	<2.2e-16	0.83	<2.2e-16	0.09	9e-14	0.69	<2.2e-16	0.05	0.0001	0.87	<2.2e-16	0.6	<2.2e-16	0.93	<2.2e-16	0.76	<2.2e-16	0.88	<2.2e-16	0.54	<2.2e-16
ZNF143	K562	TTS	lincRNA	0.79	<2.2e-16	0.78	<2.2e-16	NA	NA	0.61	<2.2e-16	0.77	<2.2e-16	NA	NA	NA	NA	NA	NA	0.61	<2.2e-16	0.7	<2.2e-16	0.8	<2.2e-16	NA	NA	0.65	<2.2e-16	0.75	<2.2e-16	0.07	3e-09	0.65	<2.2e-16	0.03	0.03	0.76	<2.2e-16	0.51	<2.2e-16	0.81	<2.2e-16	0.66	<2.2e-16	0.81	<2.2e-16	0.48	<2.2e-16
ZNF263	K562	TTS	lincRNA	0.44	<2.2e-16	0.54	<2.2e-16	NA	NA	0.37	<2.2e-16	0.49	<2.2e-16	NA	NA	NA	NA	NA	NA	0.38	<2.2e-16	0.46	<2.2e-16	0.62	<2.2e-16	NA	NA	0.47	<2.2e-16	0.56	<2.2e-16	0.21	<2.2e-16	0.43	<2.2e-16	0.15	<2.2e-16	0.58	<2.2e-16	0.28	<2.2e-16	0.65	<2.2e-16	0.53	<2.2e-16	0.64	<2.2e-16	0.42	<2.2e-16
ZNF274	K562	TTS	lincRNA	0.44	<2.2e-16	0.53	<2.2e-16	NA	NA	0.17	<2.2e-16	0.59	<2.2e-16	NA	NA	NA	NA	NA	NA	0.12	<2.2e-16	0.67	<2.2e-16	0.35	<2.2e-16	NA	NA	0.66	<2.2e-16	0.66	<2.2e-16	0.09	4e-12	0.09	3e-13	0.02	0.05	0.24	<2.2e-16	0.08	2e-10	0.41	<2.2e-16	0.23	<2.2e-16	0.39	<2.2e-16	0.11	<2.2e-16
ZNF384	K562	TTS	lincRNA	0.84	<2.2e-16	0.78	<2.2e-16	NA	NA	0.63	<2.2e-16	0.76	<2.2e-16	NA	NA	NA	NA	NA	NA	0.59	<2.2e-16	0.74	<2.2e-16	0.79	<2.2e-16	NA	NA	0.66	<2.2e-16	0.77	<2.2e-16	0.09	4e-13	0.64	<2.2e-16	0.05	7e-05	0.77	<2.2e-16	0.56	<2.2e-16	0.84	<2.2e-16	0.68	<2.2e-16	0.79	<2.2e-16	0.52	<2.2e-16
DNASE HYPERSENSITIVITY	K562	TTS	lincRNA	0.67	<2.2e-16	0.72	<2.2e-16	NA	NA	0.61	<2.2e-16	0.62	<2.2e-16	NA	NA	NA	NA	NA	NA	0.65	<2.2e-16	0.53	<2.2e-16	0.82	<2.2e-16	NA	NA	0.5	<2.2e-16	0.62	<2.2e-16	0.13	<2.2e-16	0.72	<2.2e-16	0.09	7e-14	0.85	<2.2e-16	0.54	<2.2e-16	0.81	<2.2e-16	0.76	<2.2e-16	0.83	<2.2e-16	0.56	<2.2e-16
FOS (AND EGFP-FOS)	K562	TTS	lincRNA	0.76	<2.2e-16	0.79	<2.2e-16	NA	NA	0.72	<2.2e-16	0.69	<2.2e-16	NA	NA	NA	NA	NA	NA	0.56	<2.2e-16	0.68	<2.2e-16	0.78	<2.2e-16	NA	NA	0.62	<2.2e-16	0.73	<2.2e-16	0.07	7e-09	0.64	<2.2e-16	0.04	2	0.75	<2.2e-16	0.56	<2.2e-16	0.79	<2.2e-16	0.64	<2.2e-16	0.78	<2.2e-16	0.48	<2.2e-16
JUND (AND EGFP-JUND)	K562	TTS	lincRNA	0.82	<2.2e-16	0.84	<2.2e-16	NA	NA	0.84	<2.2e-16	0.71	<2.2e-16	NA	NA	NA	NA	NA	NA	0.63	<2.2e-16	0.67	<2.2e-16	0.84	<2.2e-16	NA	NA	0.6	<2.2e-16	0.72	<2.2e-16	0.06	4e-07	0.71	<2.2e-16	0.03	7	0.82	<2.2e-16	0.65	<2.2e-16	0.85	<2.2e-16	0.69	<2.2e-16	0.78	<2.2e-16	0.54	<2.2e-16
GATA2 (AND EGFP-GATA2)	K562	TTS	lincRNA	0.33	<2.2e-16	0.27	<2.2e-16	NA	NA	0.39	<2.2e-16	0.15	<2.2e-16	NA	NA	NA	NA	NA	NA	0.32	<2.2e-16	0.17	<2.2e-16	0.29	<2.2e-16	NA	NA	0.11	<2.2e-16	0.18	<2.2e-16	0.14	<2.2e-16	0.52	<2.2e-16	0.17	<2.2e-16	0.32	<2.2e-16	0.58	<2.2e-16	0.36	<2.2e-16	0.42	<2.2e-16	0.21	<2.2e-16	0.54	<2.2e-16
ATF2	GM12878	TSS	protein coding	NA	NA	NA	NA	NA	NA	0.45	<2.2e-16	NA	NA	0.38	<2.2e-16	0.64	<2.2e-16	0.62	<2.2e-16	0.81	<2.2e-16	NA	NA	0.59	<2.2e-16	0.58	<2.2e-16	NA	NA	NA	NA	NA	NA	NA	NA	NA	NA	NA	NA	0.78	<2.2e-16	NA	NA	0.67	<2.2e-16	0.55	<2.2e-16	NA	NA
ATF3	GM12878	TSS	protein coding	NA	NA	NA	NA	0.45	<2.2e-16	NA	NA	NA	NA	0.11	<2.2e-16	0.22	<2.2e-16	0.34	<2.2e-16	0.44	<2.2e-16	NA	NA	0.51	<2.2e-16	0.43	<2.2e-16	NA	NA	NA	NA	NA	NA	NA	NA	NA	NA	NA	NA	0.55	<2.2e-16	NA	NA	0.43	<2.2e-16	0.37	<2.2e-16	NA	NA
BATF	GM12878	TSS	protein coding	NA	NA	NA	NA	0.38	<2.2e-16	0.11	<2.2e-16	NA	NA	NA	NA	0.62	<2.2e-16	0.26	<2.2e-16	0.25	<2.2e-16	NA	NA	0.2	<2.2e-16	0.11	<2.2e-16	NA	NA	NA	NA	NA	NA	NA	NA	NA	NA	NA	NA	0.32	<2.2e-16	NA	NA	0.19	<2.2e-16	0.11	<2.2e-16	NA	NA
BCL11A	GM12878	TSS	protein coding	NA	NA	NA	NA	0.64	<2.2e-16	0.22	<2.2e-16	NA	NA	0.62	<2.2e-16	NA	NA	0.48	<2.2e-16	0.55	<2.2e-16	NA	NA	0.39	<2.2e-16	0.28	<2.2e-16	NA	NA	NA	NA	NA	NA	NA	NA	NA	NA	NA	NA	0.58	<2.2e-16	NA	NA	0.42	<2.2e-16	0.28	<2.2e-16	NA	NA
BCL3	GM12878	TSS	protein coding	NA	NA	NA	NA	0.62	<2.2e-16	0.34	<2.2e-16	NA	NA	0.26	<2.2e-16	0.48	<2.2e-16	NA	NA	0.61	<2.2e-16	NA	NA	0.47	<2.2e-16	0.45	<2.2e-16	NA	NA	NA	NA	NA	NA	NA	NA	NA	NA	NA	NA	0.62	<2.2e-16	NA	NA	0.51	<2.2e-16	0.38	<2.2e-16	NA	NA
BCLAF1	GM12878	TSS	protein coding	NA	NA	NA	NA	0.81	<2.2e-16	0.44	<2.2e-16	NA	NA	0.25	<2.2e-16	0.55	<2.2e-16	0.61	<2.2e-16	NA	NA	NA	NA	0.57	<2.2e-16	0.55	<2.2e-16	NA	NA	NA	NA	NA	NA	NA	NA	NA	NA	NA	NA	0.79	<2.2e-16	NA	NA	0.67	<2.2e-16	0.5	<2.2e-16	NA	NA
BHLHE40	GM12878	TSS	protein coding	NA	NA	NA	NA	0.59	<2.2e-16	0.51	<2.2e-16	NA	NA	0.2	<2.2e-16	0.39	<2.2e-16	0.47	<2.2e-16	0.57	<2.2e-16	NA	NA	NA	NA	0.53	<2.2e-16	NA	NA	NA	NA	NA	NA	NA	NA	NA	NA	NA	NA	0.66	<2.2e-16	NA	NA	0.74	<2.2e-16	0.47	<2.2e-16	NA	NA
BRCA1	GM12878	TSS	protein coding	NA	NA	NA	NA	0.58	<2.2e-16	0.43	<2.2e-16	NA	NA	0.11	<2.2e-16	0.28	<2.2e-16	0.45	<2.2e-16	0.55	<2.2e-16	NA	NA	0.53	<2.2e-16	NA	NA	NA	NA	NA	NA	NA	NA	NA	NA	NA	NA	NA	NA	0.64	<2.2e-16	NA	NA	0.6	<2.2e-16	0.91	<2.2e-16	NA	NA
CEBPB	GM12878	TSS	protein coding	NA	NA	NA	NA	0.78	<2.2e-16	0.55	<2.2e-16	NA	NA	0.32	<2.2e-16	0.58	<2.2e-16	0.62	<2.2e-16	0.79	<2.2e-16	NA	NA	0.66	<2.2e-16	0.64	<2.2e-16	NA	NA	NA	NA	NA	NA	NA	NA	NA	NA	NA	NA	NA	NA	NA	NA	0.74	<2.2e-16	0.57	<2.2e-16	NA	NA
CHD1	GM12878	TSS	protein coding	NA	NA	NA	NA	0.67	<2.2e-16	0.43	<2.2e-16	NA	NA	0.19	<2.2e-16	0.42	<2.2e-16	0.51	<2.2e-16	0.67	<2.2e-16	NA	NA	0.74	<2.2e-16	0.6	<2.2e-16	NA	NA	NA	NA	NA	NA	NA	NA	NA	NA	NA	NA	0.74	<2.2e-16	NA	NA	NA	NA	0.52	<2.2e-16	NA	NA
CHD2	GM12878	TSS	protein coding	NA	NA	NA	NA	0.55	<2.2e-16	0.37	<2.2e-16	NA	NA	0.11	<2.2e-16	0.28	<2.2e-16	0.38	<2.2e-16	0.5	<2.2e-16	NA	NA	0.47	<2.2e-16	0.91	<2.2e-16	NA	NA	NA	NA	NA	NA	NA	NA	NA	NA	NA	NA	0.57	<2.2e-16	NA	NA	0.52	<2.2e-16	NA	NA	NA	NA
COREST-RCOR1	GM12878	TSS	protein coding	NA	NA	NA	NA	0.75	<2.2e-16	0.54	<2.2e-16	NA	NA	0.22	<2.2e-16	0.45	<2.2e-16	0.59	<2.2e-16	0.76	<2.2e-16	NA	NA	0.7	<2.2e-16	0.79	<2.2e-16	NA	NA	NA	NA	NA	NA	NA	NA	NA	NA	NA	NA	0.87	<2.2e-16	NA	NA	0.77	<2.2e-16	0.71	<2.2e-16	NA	NA
CREB1	GM12878	TSS	protein coding	NA	NA	NA	NA	0.64	<2.2e-16	0.62	<2.2e-16	NA	NA	0.14	<2.2e-16	0.31	<2.2e-16	0.43	<2.2e-16	0.58	<2.2e-16	NA	NA	0.52	<2.2e-16	0.54	<2.2e-16	NA	NA	NA	NA	NA	NA	NA	NA	NA	NA	NA	NA	0.67	<2.2e-16	NA	NA	0.55	<2.2e-16	0.51	<2.2e-16	NA	NA
CTCF	GM12878	TSS	protein coding	NA	NA	NA	NA	0.27	<2.2e-16	0.23	<2.2e-16	NA	NA	0.05	2e-10	0.14	<2.2e-16	0.23	<2.2e-16	0.35	<2.2e-16	NA	NA	0.3	<2.2e-16	0.29	<2.2e-16	NA	NA	NA	NA	NA	NA	NA	NA	NA	NA	NA	NA	0.34	<2.2e-16	NA	NA	0.27	<2.2e-16	0.22	<2.2e-16	NA	NA
CUX1	GM12878	TSS	protein coding	NA	NA	NA	NA	0.74	<2.2e-16	0.51	<2.2e-16	NA	NA	0.25	<2.2e-16	0.44	<2.2e-16	0.57	<2.2e-16	0.73	<2.2e-16	NA	NA	0.65	<2.2e-16	0.65	<2.2e-16	NA	NA	NA	NA	NA	NA	NA	NA	NA	NA	NA	NA	0.84	<2.2e-16	NA	NA	0.74	<2.2e-16	0.55	<2.2e-16	NA	NA
E2F4	GM12878	TSS	protein coding	NA	NA	NA	NA	0.49	<2.2e-16	0.41	<2.2e-16	NA	NA	0.11	<2.2e-16	0.27	<2.2e-16	0.37	<2.2e-16	0.52	<2.2e-16	NA	NA	0.46	<2.2e-16	0.51	<2.2e-16	NA	NA	NA	NA	NA	NA	NA	NA	NA	NA	NA	NA	0.6	<2.2e-16	NA	NA	0.55	<2.2e-16	0.48	<2.2e-16	NA	NA
EBF1	GM12878	TSS	protein coding	NA	NA	NA	NA	0.41	<2.2e-16	0.2	<2.2e-16	NA	NA	0.27	<2.2e-16	0.51	<2.2e-16	0.39	<2.2e-16	0.38	<2.2e-16	NA	NA	0.38	<2.2e-16	0.27	<2.2e-16	NA	NA	NA	NA	NA	NA	NA	NA	NA	NA	NA	NA	0.46	<2.2e-16	NA	NA	0.34	<2.2e-16	0.27	<2.2e-16	NA	NA
EGR1	GM12878	TSS	protein coding	NA	NA	NA	NA	0.53	<2.2e-16	0.39	<2.2e-16	NA	NA	0.11	<2.2e-16	0.34	<2.2e-16	0.47	<2.2e-16	0.57	<2.2e-16	NA	NA	0.55	<2.2e-16	0.5	<2.2e-16	NA	NA	NA	NA	NA	NA	NA	NA	NA	NA	NA	NA	0.62	<2.2e-16	NA	NA	0.56	<2.2e-16	0.45	<2.2e-16	NA	NA
ELF1	GM12878	TSS	protein coding	NA	NA	NA	NA	0.58	<2.2e-16	0.52	<2.2e-16	NA	NA	0.11	<2.2e-16	0.29	<2.2e-16	0.44	<2.2e-16	0.64	<2.2e-16	NA	NA	0.52	<2.2e-16	0.54	<2.2e-16	NA	NA	NA	NA	NA	NA	NA	NA	NA	NA	NA	NA	0.66	<2.2e-16	NA	NA	0.53	<2.2e-16	0.52	<2.2e-16	NA	NA
ELK1	GM12878	TSS	protein coding	NA	NA	NA	NA	0.69	<2.2e-16	0.56	<2.2e-16	NA	NA	0.16	<2.2e-16	0.36	<2.2e-16	0.53	<2.2e-16	0.74	<2.2e-16	NA	NA	0.64	<2.2e-16	0.66	<2.2e-16	NA	NA	NA	NA	NA	NA	NA	NA	NA	NA	NA	NA	0.81	<2.2e-16	NA	NA	0.7	<2.2e-16	0.59	<2.2e-16	NA	NA
ESRRA	GM12878	TSS	protein coding	NA	NA	NA	NA	0.73	<2.2e-16	0.58	<2.2e-16	NA	NA	0.18	<2.2e-16	0.4	<2.2e-16	0.57	<2.2e-16	0.76	<2.2e-16	NA	NA	0.69	<2.2e-16	0.71	<2.2e-16	NA	NA	NA	NA	NA	NA	NA	NA	NA	NA	NA	NA	0.86	<2.2e-16	NA	NA	0.77	<2.2e-16	0.63	<2.2e-16	NA	NA
ETS1	GM12878	TSS	protein coding	NA	NA	NA	NA	0.56	<2.2e-16	0.5	<2.2e-16	NA	NA	0.13	<2.2e-16	0.3	<2.2e-16	0.39	<2.2e-16	0.68	<2.2e-16	NA	NA	0.45	<2.2e-16	0.49	<2.2e-16	NA	NA	NA	NA	NA	NA	NA	NA	NA	NA	NA	NA	0.6	<2.2e-16	NA	NA	0.48	<2.2e-16	0.48	<2.2e-16	NA	NA
EZH2	GM12878	TSS	protein coding	NA	NA	NA	NA	0.13	<2.2e-16	0.09	<2.2e-16	NA	NA	0.09	<2.2e-16	0.1	<2.2e-16	0.06	<2.2e-16	0.1	<2.2e-16	NA	NA	0.1	<2.2e-16	0.15	<2.2e-16	NA	NA	NA	NA	NA	NA	NA	NA	NA	NA	NA	NA	0.15	<2.2e-16	NA	NA	0.14	<2.2e-16	0.07	<2.2e-16	NA	NA
FAM48A	GM12878	TSS	protein coding	NA	NA	NA	NA	0.48	<2.2e-16	0.44	<2.2e-16	NA	NA	0.07	<2.2e-16	0.17	<2.2e-16	0.38	<2.2e-16	0.49	<2.2e-16	NA	NA	0.43	<2.2e-16	0.51	<2.2e-16	NA	NA	NA	NA	NA	NA	NA	NA	NA	NA	NA	NA	0.54	<2.2e-16	NA	NA	0.51	<2.2e-16	0.39	<2.2e-16	NA	NA
FOS (AND EGFP-FOS)	GM12878	TSS	protein coding	NA	NA	NA	NA	0.35	<2.2e-16	0.37	<2.2e-16	NA	NA	0.09	<2.2e-16	0.19	<2.2e-16	0.26	<2.2e-16	0.31	<2.2e-16	NA	NA	0.36	<2.2e-16	0.34	<2.2e-16	NA	NA	NA	NA	NA	NA	NA	NA	NA	NA	NA	NA	0.42	<2.2e-16	NA	NA	0.37	<2.2e-16	0.48	<2.2e-16	NA	NA
FOXM1	GM12878	TSS	protein coding	NA	NA	NA	NA	0.85	<2.2e-16	0.45	<2.2e-16	NA	NA	0.38	<2.2e-16	0.69	<2.2e-16	0.62	<2.2e-16	0.82	<2.2e-16	NA	NA	0.61	<2.2e-16	0.56	<2.2e-16	NA	NA	NA	NA	NA	NA	NA	NA	NA	NA	NA	NA	0.86	<2.2e-16	NA	NA	0.72	<2.2e-16	0.55	<2.2e-16	NA	NA
GABP	GM12878	TSS	protein coding	NA	NA	NA	NA	0.26	<2.2e-16	0.2	<2.2e-16	NA	NA	0.05	8e-14	0.16	<2.2e-16	0.19	<2.2e-16	0.44	<2.2e-16	NA	NA	0.18	<2.2e-16	0.2	<2.2e-16	NA	NA	NA	NA	NA	NA	NA	NA	NA	NA	NA	NA	0.32	<2.2e-16	NA	NA	0.18	<2.2e-16	0.2	<2.2e-16	NA	NA
H2AZ	GM12878	TSS	protein coding	NA	NA	NA	NA	0.47	<2.2e-16	0.51	<2.2e-16	NA	NA	0.12	<2.2e-16	0.25	<2.2e-16	0.34	<2.2e-16	0.53	<2.2e-16	NA	NA	0.53	<2.2e-16	0.55	<2.2e-16	NA	NA	NA	NA	NA	NA	NA	NA	NA	NA	NA	NA	0.74	<2.2e-16	NA	NA	0.55	<2.2e-16	0.48	<2.2e-16	NA	NA
H3K27AC	GM12878	TSS	protein coding	NA	NA	NA	NA	0.75	<2.2e-16	0.45	<2.2e-16	NA	NA	0.26	<2.2e-16	0.53	<2.2e-16	0.56	<2.2e-16	0.75	<2.2e-16	NA	NA	0.62	<2.2e-16	0.59	<2.2e-16	NA	NA	NA	NA	NA	NA	NA	NA	NA	NA	NA	NA	0.84	<2.2e-16	NA	NA	0.76	<2.2e-16	0.55	<2.2e-16	NA	NA
H3K27ME3	GM12878	TSS	protein coding	NA	NA	NA	NA	-0.33	<2.2e-16	-0.28	<2.2e-16	NA	NA	-0.1	<2.2e-16	-0.22	<2.2e-16	-0.29	<2.2e-16	-0.36	<2.2e-16	NA	NA	-0.29	<2.2e-16	-0.26	<2.2e-16	NA	NA	NA	NA	NA	NA	NA	NA	NA	NA	NA	NA	-0.45	<2.2e-16	NA	NA	-0.31	<2.2e-16	-0.29	<2.2e-16	NA	NA
H3K36ME3	GM12878	TSS	protein coding	NA	NA	NA	NA	0.28	<2.2e-16	0.25	<2.2e-16	NA	NA	0.08	<2.2e-16	0.18	<2.2e-16	0.35	<2.2e-16	0.3	<2.2e-16	NA	NA	0.2	<2.2e-16	0.26	<2.2e-16	NA	NA	NA	NA	NA	NA	NA	NA	NA	NA	NA	NA	0.39	<2.2e-16	NA	NA	0.25	<2.2e-16	0.23	<2.2e-16	NA	NA
H3K4ME1	GM12878	TSS	protein coding	NA	NA	NA	NA	0.41	<2.2e-16	0.35	<2.2e-16	NA	NA	0.26	<2.2e-16	0.37	<2.2e-16	0.43	<2.2e-16	0.38	<2.2e-16	NA	NA	0.41	<2.2e-16	0.4	<2.2e-16	NA	NA	NA	NA	NA	NA	NA	NA	NA	NA	NA	NA	0.63	<2.2e-16	NA	NA	0.39	<2.2e-16	0.31	<2.2e-16	NA	NA
H3K4ME2	GM12878	TSS	protein coding	NA	NA	NA	NA	0.57	<2.2e-16	0.52	<2.2e-16	NA	NA	0.19	<2.2e-16	0.38	<2.2e-16	0.5	<2.2e-16	0.61	<2.2e-16	NA	NA	0.62	<2.2e-16	0.61	<2.2e-16	NA	NA	NA	NA	NA	NA	NA	NA	NA	NA	NA	NA	0.83	<2.2e-16	NA	NA	0.65	<2.2e-16	0.53	<2.2e-16	NA	NA
H3K4ME3	GM12878	TSS	protein coding	NA	NA	NA	NA	0.64	<2.2e-16	0.56	<2.2e-16	NA	NA	0.17	<2.2e-16	0.38	<2.2e-16	0.48	<2.2e-16	0.7	<2.2e-16	NA	NA	0.62	<2.2e-16	0.65	<2.2e-16	NA	NA	NA	NA	NA	NA	NA	NA	NA	NA	NA	NA	0.86	<2.2e-16	NA	NA	0.71	<2.2e-16	0.59	<2.2e-16	NA	NA
H3K79ME2	GM12878	TSS	protein coding	NA	NA	NA	NA	0.57	<2.2e-16	0.48	<2.2e-16	NA	NA	0.13	<2.2e-16	0.33	<2.2e-16	0.44	<2.2e-16	0.63	<2.2e-16	NA	NA	0.54	<2.2e-16	0.57	<2.2e-16	NA	NA	NA	NA	NA	NA	NA	NA	NA	NA	NA	NA	0.74	<2.2e-16	NA	NA	0.65	<2.2e-16	0.53	<2.2e-16	NA	NA
H3K9AC	GM12878	TSS	protein coding	NA	NA	NA	NA	0.69	<2.2e-16	0.52	<2.2e-16	NA	NA	0.17	<2.2e-16	0.43	<2.2e-16	0.52	<2.2e-16	0.73	<2.2e-16	NA	NA	0.63	<2.2e-16	0.66	<2.2e-16	NA	NA	NA	NA	NA	NA	NA	NA	NA	NA	NA	NA	0.85	<2.2e-16	NA	NA	0.76	<2.2e-16	0.61	<2.2e-16	NA	NA
H3K9ME3	GM12878	TSS	protein coding	NA	NA	NA	NA	0.1	<2.2e-16	0.06	2e-15	NA	NA	0.12	<2.2e-16	0.12	<2.2e-16	0.05	2e-12	0.08	<2.2e-16	NA	NA	0.06	2e-15	0.08	<2.2e-16	NA	NA	NA	NA	NA	NA	NA	NA	NA	NA	NA	NA	0.11	<2.2e-16	NA	NA	0.08	<2.2e-16	0.06	6e-15	NA	NA
H4K20ME1	GM12878	TSS	protein coding	NA	NA	NA	NA	-0.01	0.3	0.03	0.0002	NA	NA	-0.02	0.03	0.01	0.3	0.08	<2.2e-16	0	1	NA	NA	0.05	2e-11	0.11	<2.2e-16	NA	NA	NA	NA	NA	NA	NA	NA	NA	NA	NA	NA	0.02	1	NA	NA	0.08	<2.2e-16	0.07	<2.2e-16	NA	NA
IKZF1	GM12878	TSS	protein coding	NA	NA	NA	NA	0.66	<2.2e-16	0.35	<2.2e-16	NA	NA	0.35	<2.2e-16	0.5	<2.2e-16	0.48	<2.2e-16	0.59	<2.2e-16	NA	NA	0.49	<2.2e-16	0.46	<2.2e-16	NA	NA	NA	NA	NA	NA	NA	NA	NA	NA	NA	NA	0.7	<2.2e-16	NA	NA	0.58	<2.2e-16	0.37	<2.2e-16	NA	NA
IRF3	GM12878	TSS	protein coding	NA	NA	NA	NA	0.59	<2.2e-16	0.46	<2.2e-16	NA	NA	0.15	<2.2e-16	0.29	<2.2e-16	0.44	<2.2e-16	0.56	<2.2e-16	NA	NA	0.54	<2.2e-16	0.58	<2.2e-16	NA	NA	NA	NA	NA	NA	NA	NA	NA	NA	NA	NA	0.69	<2.2e-16	NA	NA	0.63	<2.2e-16	0.6	<2.2e-16	NA	NA
IRF4	GM12878	TSS	protein coding	NA	NA	NA	NA	0.58	<2.2e-16	0.27	<2.2e-16	NA	NA	0.54	<2.2e-16	0.76	<2.2e-16	0.39	<2.2e-16	0.56	<2.2e-16	NA	NA	0.38	<2.2e-16	0.3	<2.2e-16	NA	NA	NA	NA	NA	NA	NA	NA	NA	NA	NA	NA	0.56	<2.2e-16	NA	NA	0.4	<2.2e-16	0.32	<2.2e-16	NA	NA
JUND (AND EGFP-JUND)	GM12878	TSS	protein coding	NA	NA	NA	NA	0.6	<2.2e-16	0.44	<2.2e-16	NA	NA	0.21	<2.2e-16	0.35	<2.2e-16	0.46	<2.2e-16	0.56	<2.2e-16	NA	NA	0.72	<2.2e-16	0.58	<2.2e-16	NA	NA	NA	NA	NA	NA	NA	NA	NA	NA	NA	NA	0.66	<2.2e-16	NA	NA	0.88	<2.2e-16	0.48	<2.2e-16	NA	NA
KAT2A-GCN5	GM12878	TSS	protein coding	NA	NA	NA	NA	0.64	<2.2e-16	0.47	<2.2e-16	NA	NA	0.12	<2.2e-16	0.31	<2.2e-16	0.5	<2.2e-16	0.65	<2.2e-16	NA	NA	0.56	<2.2e-16	0.64	<2.2e-16	NA	NA	NA	NA	NA	NA	NA	NA	NA	NA	NA	NA	0.72	<2.2e-16	NA	NA	0.7	<2.2e-16	0.54	<2.2e-16	NA	NA
MAFK	GM12878	TSS	protein coding	NA	NA	NA	NA	0.71	<2.2e-16	0.57	<2.2e-16	NA	NA	0.19	<2.2e-16	0.38	<2.2e-16	0.56	<2.2e-16	0.73	<2.2e-16	NA	NA	0.67	<2.2e-16	0.7	<2.2e-16	NA	NA	NA	NA	NA	NA	NA	NA	NA	NA	NA	NA	0.85	<2.2e-16	NA	NA	0.75	<2.2e-16	0.6	<2.2e-16	NA	NA
MAX	GM12878	TSS	protein coding	NA	NA	NA	NA	0.67	<2.2e-16	0.63	<2.2e-16	NA	NA	0.16	<2.2e-16	0.38	<2.2e-16	0.55	<2.2e-16	0.71	<2.2e-16	NA	NA	0.77	<2.2e-16	0.67	<2.2e-16	NA	NA	NA	NA	NA	NA	NA	NA	NA	NA	NA	NA	0.82	<2.2e-16	NA	NA	0.73	<2.2e-16	0.6	<2.2e-16	NA	NA
MAZ	GM12878	TSS	protein coding	NA	NA	NA	NA	0.63	<2.2e-16	0.49	<2.2e-16	NA	NA	0.14	<2.2e-16	0.36	<2.2e-16	0.52	<2.2e-16	0.67	<2.2e-16	NA	NA	0.68	<2.2e-16	0.63	<2.2e-16	NA	NA	NA	NA	NA	NA	NA	NA	NA	NA	NA	NA	0.76	<2.2e-16	NA	NA	0.71	<2.2e-16	0.6	<2.2e-16	NA	NA
MEF2A	GM12878	TSS	protein coding	NA	NA	NA	NA	0.79	<2.2e-16	0.44	<2.2e-16	NA	NA	0.33	<2.2e-16	0.58	<2.2e-16	0.56	<2.2e-16	0.77	<2.2e-16	NA	NA	0.58	<2.2e-16	0.53	<2.2e-16	NA	NA	NA	NA	NA	NA	NA	NA	NA	NA	NA	NA	0.75	<2.2e-16	NA	NA	0.64	<2.2e-16	0.48	<2.2e-16	NA	NA
MEF2C	GM12878	TSS	protein coding	NA	NA	NA	NA	0.73	<2.2e-16	0.4	<2.2e-16	NA	NA	0.3	<2.2e-16	0.57	<2.2e-16	0.52	<2.2e-16	0.73	<2.2e-16	NA	NA	0.54	<2.2e-16	0.48	<2.2e-16	NA	NA	NA	NA	NA	NA	NA	NA	NA	NA	NA	NA	0.66	<2.2e-16	NA	NA	0.57	<2.2e-16	0.45	<2.2e-16	NA	NA
MTA3	GM12878	TSS	protein coding	NA	NA	NA	NA	0.84	<2.2e-16	0.47	<2.2e-16	NA	NA	0.28	<2.2e-16	0.59	<2.2e-16	0.71	<2.2e-16	0.83	<2.2e-16	NA	NA	0.62	<2.2e-16	0.6	<2.2e-16	NA	NA	NA	NA	NA	NA	NA	NA	NA	NA	NA	NA	0.85	<2.2e-16	NA	NA	0.72	<2.2e-16	0.54	<2.2e-16	NA	NA
MXI1	GM12878	TSS	protein coding	NA	NA	NA	NA	0.67	<2.2e-16	0.58	<2.2e-16	NA	NA	0.16	<2.2e-16	0.37	<2.2e-16	0.52	<2.2e-16	0.7	<2.2e-16	NA	NA	0.7	<2.2e-16	0.67	<2.2e-16	NA	NA	NA	NA	NA	NA	NA	NA	NA	NA	NA	NA	0.8	<2.2e-16	NA	NA	0.71	<2.2e-16	0.61	<2.2e-16	NA	NA
MYC	GM12878	TSS	protein coding	NA	NA	NA	NA	0.58	<2.2e-16	0.51	<2.2e-16	NA	NA	0.13	<2.2e-16	0.36	<2.2e-16	0.5	<2.2e-16	0.64	<2.2e-16	NA	NA	0.66	<2.2e-16	0.61	<2.2e-16	NA	NA	NA	NA	NA	NA	NA	NA	NA	NA	NA	NA	0.75	<2.2e-16	NA	NA	0.64	<2.2e-16	0.55	<2.2e-16	NA	NA
NFATC1	GM12878	TSS	protein coding	NA	NA	NA	NA	0.79	<2.2e-16	0.39	<2.2e-16	NA	NA	0.28	<2.2e-16	0.58	<2.2e-16	0.72	<2.2e-16	0.77	<2.2e-16	NA	NA	0.53	<2.2e-16	0.52	<2.2e-16	NA	NA	NA	NA	NA	NA	NA	NA	NA	NA	NA	NA	0.75	<2.2e-16	NA	NA	0.64	<2.2e-16	0.47	<2.2e-16	NA	NA
NFE2	GM12878	TSS	protein coding	NA	NA	NA	NA	0.56	<2.2e-16	0.7	<2.2e-16	NA	NA	0.13	<2.2e-16	0.26	<2.2e-16	0.44	<2.2e-16	0.54	<2.2e-16	NA	NA	0.63	<2.2e-16	0.55	<2.2e-16	NA	NA	NA	NA	NA	NA	NA	NA	NA	NA	NA	NA	0.66	<2.2e-16	NA	NA	0.6	<2.2e-16	0.46	<2.2e-16	NA	NA
NFIC	GM12878	TSS	protein coding	NA	NA	NA	NA	0.86	<2.2e-16	0.45	<2.2e-16	NA	NA	0.45	<2.2e-16	0.73	<2.2e-16	0.61	<2.2e-16	0.78	<2.2e-16	NA	NA	0.59	<2.2e-16	0.51	<2.2e-16	NA	NA	NA	NA	NA	NA	NA	NA	NA	NA	NA	NA	0.83	<2.2e-16	NA	NA	0.69	<2.2e-16	0.47	<2.2e-16	NA	NA
NFYA	GM12878	TSS	protein coding	NA	NA	NA	NA	0.37	<2.2e-16	0.29	<2.2e-16	NA	NA	0.07	<2.2e-16	0.16	<2.2e-16	0.26	<2.2e-16	0.32	<2.2e-16	NA	NA	0.33	<2.2e-16	0.36	<2.2e-16	NA	NA	NA	NA	NA	NA	NA	NA	NA	NA	NA	NA	0.43	<2.2e-16	NA	NA	0.4	<2.2e-16	0.47	<2.2e-16	NA	NA
NFYB	GM12878	TSS	protein coding	NA	NA	NA	NA	0.26	<2.2e-16	0.2	<2.2e-16	NA	NA	0.05	3e-10	0.12	<2.2e-16	0.19	<2.2e-16	0.21	<2.2e-16	NA	NA	0.25	<2.2e-16	0.26	<2.2e-16	NA	NA	NA	NA	NA	NA	NA	NA	NA	NA	NA	NA	0.31	<2.2e-16	NA	NA	0.29	<2.2e-16	0.41	<2.2e-16	NA	NA
NRF1	GM12878	TSS	protein coding	NA	NA	NA	NA	0.41	<2.2e-16	0.46	<2.2e-16	NA	NA	0.09	<2.2e-16	0.19	<2.2e-16	0.32	<2.2e-16	0.42	<2.2e-16	NA	NA	0.46	<2.2e-16	0.45	<2.2e-16	NA	NA	NA	NA	NA	NA	NA	NA	NA	NA	NA	NA	0.54	<2.2e-16	NA	NA	0.46	<2.2e-16	0.4	<2.2e-16	NA	NA
NRSF-REST	GM12878	TSS	protein coding	NA	NA	NA	NA	0.01	0.4	0	0.7	NA	NA	0.01	0.3	0.01	0.04	0	0.6	0	0.7	NA	NA	0.01	0.2	0.01	0.07	NA	NA	NA	NA	NA	NA	NA	NA	NA	NA	NA	NA	-0.01	0.4	NA	NA	0.01	0.3	0.01	0.3	NA	NA
P300	GM12878	TSS	protein coding	NA	NA	NA	NA	0.79	<2.2e-16	0.53	<2.2e-16	NA	NA	0.32	<2.2e-16	0.54	<2.2e-16	0.6	<2.2e-16	0.74	<2.2e-16	NA	NA	0.71	<2.2e-16	0.66	<2.2e-16	NA	NA	NA	NA	NA	NA	NA	NA	NA	NA	NA	NA	0.86	<2.2e-16	NA	NA	0.76	<2.2e-16	0.57	<2.2e-16	NA	NA
PAX5	GM12878	TSS	protein coding	NA	NA	NA	NA	0.6	<2.2e-16	0.32	<2.2e-16	NA	NA	0.38	<2.2e-16	0.71	<2.2e-16	0.47	<2.2e-16	0.58	<2.2e-16	NA	NA	0.48	<2.2e-16	0.38	<2.2e-16	NA	NA	NA	NA	NA	NA	NA	NA	NA	NA	NA	NA	0.62	<2.2e-16	NA	NA	0.49	<2.2e-16	0.4	<2.2e-16	NA	NA
PBX3	GM12878	TSS	protein coding	NA	NA	NA	NA	0.25	<2.2e-16	0.12	<2.2e-16	NA	NA	0.14	<2.2e-16	0.27	<2.2e-16	0.22	<2.2e-16	0.21	<2.2e-16	NA	NA	0.2	<2.2e-16	0.19	<2.2e-16	NA	NA	NA	NA	NA	NA	NA	NA	NA	NA	NA	NA	0.29	<2.2e-16	NA	NA	0.24	<2.2e-16	0.36	<2.2e-16	NA	NA
PML	GM12878	TSS	protein coding	NA	NA	NA	NA	0.82	<2.2e-16	0.52	<2.2e-16	NA	NA	0.21	<2.2e-16	0.51	<2.2e-16	0.62	<2.2e-16	0.84	<2.2e-16	NA	NA	0.63	<2.2e-16	0.64	<2.2e-16	NA	NA	NA	NA	NA	NA	NA	NA	NA	NA	NA	NA	0.85	<2.2e-16	NA	NA	0.75	<2.2e-16	0.6	<2.2e-16	NA	NA
POL2	GM12878	TSS	protein coding	NA	NA	NA	NA	0.75	<2.2e-16	0.5	<2.2e-16	NA	NA	0.19	<2.2e-16	0.47	<2.2e-16	0.58	<2.2e-16	0.77	<2.2e-16	NA	NA	0.61	<2.2e-16	0.63	<2.2e-16	NA	NA	NA	NA	NA	NA	NA	NA	NA	NA	NA	NA	0.82	<2.2e-16	NA	NA	0.75	<2.2e-16	0.59	<2.2e-16	NA	NA
POL3	GM12878	TSS	protein coding	NA	NA	NA	NA	0.61	<2.2e-16	0.47	<2.2e-16	NA	NA	0.17	<2.2e-16	0.32	<2.2e-16	0.47	<2.2e-16	0.62	<2.2e-16	NA	NA	0.56	<2.2e-16	0.58	<2.2e-16	NA	NA	NA	NA	NA	NA	NA	NA	NA	NA	NA	NA	0.74	<2.2e-16	NA	NA	0.63	<2.2e-16	0.5	<2.2e-16	NA	NA
POU2F2	GM12878	TSS	protein coding	NA	NA	NA	NA	0.69	<2.2e-16	0.35	<2.2e-16	NA	NA	0.31	<2.2e-16	0.64	<2.2e-16	0.53	<2.2e-16	0.71	<2.2e-16	NA	NA	0.5	<2.2e-16	0.48	<2.2e-16	NA	NA	NA	NA	NA	NA	NA	NA	NA	NA	NA	NA	0.72	<2.2e-16	NA	NA	0.63	<2.2e-16	0.47	<2.2e-16	NA	NA
RAD21	GM12878	TSS	protein coding	NA	NA	NA	NA	0.49	<2.2e-16	0.36	<2.2e-16	NA	NA	0.16	<2.2e-16	0.29	<2.2e-16	0.4	<2.2e-16	0.52	<2.2e-16	NA	NA	0.45	<2.2e-16	0.44	<2.2e-16	NA	NA	NA	NA	NA	NA	NA	NA	NA	NA	NA	NA	0.58	<2.2e-16	NA	NA	0.48	<2.2e-16	0.36	<2.2e-16	NA	NA
RELA	GM12878	TSS	protein coding	NA	NA	NA	NA	0.81	<2.2e-16	0.52	<2.2e-16	NA	NA	0.3	<2.2e-16	0.54	<2.2e-16	0.6	<2.2e-16	0.79	<2.2e-16	NA	NA	0.64	<2.2e-16	0.64	<2.2e-16	NA	NA	NA	NA	NA	NA	NA	NA	NA	NA	NA	NA	0.88	<2.2e-16	NA	NA	0.75	<2.2e-16	0.56	<2.2e-16	NA	NA
RFX5	GM12878	TSS	protein coding	NA	NA	NA	NA	0.64	<2.2e-16	0.51	<2.2e-16	NA	NA	0.16	<2.2e-16	0.33	<2.2e-16	0.49	<2.2e-16	0.62	<2.2e-16	NA	NA	0.61	<2.2e-16	0.62	<2.2e-16	NA	NA	NA	NA	NA	NA	NA	NA	NA	NA	NA	NA	0.74	<2.2e-16	NA	NA	0.67	<2.2e-16	0.59	<2.2e-16	NA	NA
RUNX3	GM12878	TSS	protein coding	NA	NA	NA	NA	0.8	<2.2e-16	0.48	<2.2e-16	NA	NA	0.34	<2.2e-16	0.6	<2.2e-16	0.58	<2.2e-16	0.77	<2.2e-16	NA	NA	0.63	<2.2e-16	0.56	<2.2e-16	NA	NA	NA	NA	NA	NA	NA	NA	NA	NA	NA	NA	0.81	<2.2e-16	NA	NA	0.67	<2.2e-16	0.53	<2.2e-16	NA	NA
RXRA	GM12878	TSS	protein coding	NA	NA	NA	NA	0.62	<2.2e-16	0.4	<2.2e-16	NA	NA	0.33	<2.2e-16	0.58	<2.2e-16	0.47	<2.2e-16	0.65	<2.2e-16	NA	NA	0.47	<2.2e-16	0.44	<2.2e-16	NA	NA	NA	NA	NA	NA	NA	NA	NA	NA	NA	NA	0.71	<2.2e-16	NA	NA	0.53	<2.2e-16	0.43	<2.2e-16	NA	NA
SIN3A	GM12878	TSS	protein coding	NA	NA	NA	NA	0.65	<2.2e-16	0.6	<2.2e-16	NA	NA	0.14	<2.2e-16	0.34	<2.2e-16	0.51	<2.2e-16	0.7	<2.2e-16	NA	NA	0.66	<2.2e-16	0.66	<2.2e-16	NA	NA	NA	NA	NA	NA	NA	NA	NA	NA	NA	NA	0.8	<2.2e-16	NA	NA	0.71	<2.2e-16	0.61	<2.2e-16	NA	NA
SIX5	GM12878	TSS	protein coding	NA	NA	NA	NA	0.27	<2.2e-16	0.35	<2.2e-16	NA	NA	0.04	5e-07	0.09	<2.2e-16	0.17	<2.2e-16	0.39	<2.2e-16	NA	NA	0.25	<2.2e-16	0.3	<2.2e-16	NA	NA	NA	NA	NA	NA	NA	NA	NA	NA	NA	NA	0.33	<2.2e-16	NA	NA	0.27	<2.2e-16	0.32	<2.2e-16	NA	NA
SMC3	GM12878	TSS	protein coding	NA	NA	NA	NA	0.57	<2.2e-16	0.42	<2.2e-16	NA	NA	0.17	<2.2e-16	0.33	<2.2e-16	0.47	<2.2e-16	0.61	<2.2e-16	NA	NA	0.53	<2.2e-16	0.54	<2.2e-16	NA	NA	NA	NA	NA	NA	NA	NA	NA	NA	NA	NA	0.68	<2.2e-16	NA	NA	0.58	<2.2e-16	0.43	<2.2e-16	NA	NA
SP1	GM12878	TSS	protein coding	NA	NA	NA	NA	0.38	<2.2e-16	0.23	<2.2e-16	NA	NA	0.2	<2.2e-16	0.36	<2.2e-16	0.25	<2.2e-16	0.32	<2.2e-16	NA	NA	0.34	<2.2e-16	0.29	<2.2e-16	NA	NA	NA	NA	NA	NA	NA	NA	NA	NA	NA	NA	0.42	<2.2e-16	NA	NA	0.36	<2.2e-16	0.46	<2.2e-16	NA	NA
SPI1-PU1	GM12878	TSS	protein coding	NA	NA	NA	NA	0.37	<2.2e-16	0.16	<2.2e-16	NA	NA	0.31	<2.2e-16	0.46	<2.2e-16	0.28	<2.2e-16	0.32	<2.2e-16	NA	NA	0.24	<2.2e-16	0.19	<2.2e-16	NA	NA	NA	NA	NA	NA	NA	NA	NA	NA	NA	NA	0.38	<2.2e-16	NA	NA	0.27	<2.2e-16	0.18	<2.2e-16	NA	NA
SREBP1	GM12878	TSS	protein coding	NA	NA	NA	NA	0.67	<2.2e-16	0.56	<2.2e-16	NA	NA	0.18	<2.2e-16	0.36	<2.2e-16	0.5	<2.2e-16	0.71	<2.2e-16	NA	NA	0.7	<2.2e-16	0.65	<2.2e-16	NA	NA	NA	NA	NA	NA	NA	NA	NA	NA	NA	NA	0.78	<2.2e-16	NA	NA	0.83	<2.2e-16	0.59	<2.2e-16	NA	NA
SREBP2	GM12878	TSS	protein coding	NA	NA	NA	NA	0.7	<2.2e-16	0.55	<2.2e-16	NA	NA	0.18	<2.2e-16	0.36	<2.2e-16	0.52	<2.2e-16	0.73	<2.2e-16	NA	NA	0.64	<2.2e-16	0.66	<2.2e-16	NA	NA	NA	NA	NA	NA	NA	NA	NA	NA	NA	NA	0.83	<2.2e-16	NA	NA	0.72	<2.2e-16	0.58	<2.2e-16	NA	NA
SRF	GM12878	TSS	protein coding	NA	NA	NA	NA	0.47	<2.2e-16	0.42	<2.2e-16	NA	NA	0.13	<2.2e-16	0.27	<2.2e-16	0.35	<2.2e-16	0.52	<2.2e-16	NA	NA	0.42	<2.2e-16	0.41	<2.2e-16	NA	NA	NA	NA	NA	NA	NA	NA	NA	NA	NA	NA	0.52	<2.2e-16	NA	NA	0.42	<2.2e-16	0.36	<2.2e-16	NA	NA
STAT1	GM12878	TSS	protein coding	NA	NA	NA	NA	0.69	<2.2e-16	0.58	<2.2e-16	NA	NA	0.16	<2.2e-16	0.37	<2.2e-16	0.56	<2.2e-16	0.74	<2.2e-16	NA	NA	0.71	<2.2e-16	0.71	<2.2e-16	NA	NA	NA	NA	NA	NA	NA	NA	NA	NA	NA	NA	0.85	<2.2e-16	NA	NA	0.76	<2.2e-16	0.63	<2.2e-16	NA	NA
STAT3	GM12878	TSS	protein coding	NA	NA	NA	NA	0.77	<2.2e-16	0.55	<2.2e-16	NA	NA	0.27	<2.2e-16	0.45	<2.2e-16	0.56	<2.2e-16	0.76	<2.2e-16	NA	NA	0.65	<2.2e-16	0.66	<2.2e-16	NA	NA	NA	NA	NA	NA	NA	NA	NA	NA	NA	NA	0.87	<2.2e-16	NA	NA	0.75	<2.2e-16	0.57	<2.2e-16	NA	NA
STAT5A	GM12878	TSS	protein coding	NA	NA	NA	NA	0.83	<2.2e-16	0.47	<2.2e-16	NA	NA	0.29	<2.2e-16	0.59	<2.2e-16	0.69	<2.2e-16	0.87	<2.2e-16	NA	NA	0.62	<2.2e-16	0.6	<2.2e-16	NA	NA	NA	NA	NA	NA	NA	NA	NA	NA	NA	NA	0.86	<2.2e-16	NA	NA	0.73	<2.2e-16	0.54	<2.2e-16	NA	NA
TAF1	GM12878	TSS	protein coding	NA	NA	NA	NA	0.66	<2.2e-16	0.44	<2.2e-16	NA	NA	0.16	<2.2e-16	0.42	<2.2e-16	0.46	<2.2e-16	0.73	<2.2e-16	NA	NA	0.54	<2.2e-16	0.58	<2.2e-16	NA	NA	NA	NA	NA	NA	NA	NA	NA	NA	NA	NA	0.74	<2.2e-16	NA	NA	0.68	<2.2e-16	0.56	<2.2e-16	NA	NA
TBL1XR1-TBLR1	GM12878	TSS	protein coding	NA	NA	NA	NA	0.8	<2.2e-16	0.56	<2.2e-16	NA	NA	0.26	<2.2e-16	0.51	<2.2e-16	0.62	<2.2e-16	0.81	<2.2e-16	NA	NA	0.73	<2.2e-16	0.7	<2.2e-16	NA	NA	NA	NA	NA	NA	NA	NA	NA	NA	NA	NA	0.9	<2.2e-16	NA	NA	0.79	<2.2e-16	0.62	<2.2e-16	NA	NA
TBP	GM12878	TSS	protein coding	NA	NA	NA	NA	0.75	<2.2e-16	0.43	<2.2e-16	NA	NA	0.25	<2.2e-16	0.49	<2.2e-16	0.5	<2.2e-16	0.73	<2.2e-16	NA	NA	0.56	<2.2e-16	0.59	<2.2e-16	NA	NA	NA	NA	NA	NA	NA	NA	NA	NA	NA	NA	0.77	<2.2e-16	NA	NA	0.74	<2.2e-16	0.55	<2.2e-16	NA	NA
TCF12	GM12878	TSS	protein coding	NA	NA	NA	NA	0.62	<2.2e-16	0.36	<2.2e-16	NA	NA	0.31	<2.2e-16	0.67	<2.2e-16	0.48	<2.2e-16	0.64	<2.2e-16	NA	NA	0.54	<2.2e-16	0.45	<2.2e-16	NA	NA	NA	NA	NA	NA	NA	NA	NA	NA	NA	NA	0.68	<2.2e-16	NA	NA	0.58	<2.2e-16	0.45	<2.2e-16	NA	NA
TCF3	GM12878	TSS	protein coding	NA	NA	NA	NA	0.69	<2.2e-16	0.35	<2.2e-16	NA	NA	0.3	<2.2e-16	0.62	<2.2e-16	0.57	<2.2e-16	0.7	<2.2e-16	NA	NA	0.55	<2.2e-16	0.5	<2.2e-16	NA	NA	NA	NA	NA	NA	NA	NA	NA	NA	NA	NA	0.7	<2.2e-16	NA	NA	0.64	<2.2e-16	0.46	<2.2e-16	NA	NA
TR4-NR2C2	GM12878	TSS	protein coding	NA	NA	NA	NA	0.32	<2.2e-16	0.31	<2.2e-16	NA	NA	0.04	4e-09	0.14	<2.2e-16	0.32	<2.2e-16	0.35	<2.2e-16	NA	NA	0.33	<2.2e-16	0.38	<2.2e-16	NA	NA	NA	NA	NA	NA	NA	NA	NA	NA	NA	NA	0.44	<2.2e-16	NA	NA	0.33	<2.2e-16	0.31	<2.2e-16	NA	NA
USF1	GM12878	TSS	protein coding	NA	NA	NA	NA	0.22	<2.2e-16	0.58	<2.2e-16	NA	NA	0.1	<2.2e-16	0.22	<2.2e-16	0.19	<2.2e-16	0.22	<2.2e-16	NA	NA	0.43	<2.2e-16	0.2	<2.2e-16	NA	NA	NA	NA	NA	NA	NA	NA	NA	NA	NA	NA	0.3	<2.2e-16	NA	NA	0.24	<2.2e-16	0.19	<2.2e-16	NA	NA
USF2	GM12878	TSS	protein coding	NA	NA	NA	NA	0.46	<2.2e-16	0.73	<2.2e-16	NA	NA	0.12	<2.2e-16	0.26	<2.2e-16	0.38	<2.2e-16	0.45	<2.2e-16	NA	NA	0.63	<2.2e-16	0.45	<2.2e-16	NA	NA	NA	NA	NA	NA	NA	NA	NA	NA	NA	NA	0.55	<2.2e-16	NA	NA	0.5	<2.2e-16	0.39	<2.2e-16	NA	NA
WHIP	GM12878	TSS	protein coding	NA	NA	NA	NA	0.73	<2.2e-16	0.57	<2.2e-16	NA	NA	0.2	<2.2e-16	0.43	<2.2e-16	0.58	<2.2e-16	0.76	<2.2e-16	NA	NA	0.67	<2.2e-16	0.69	<2.2e-16	NA	NA	NA	NA	NA	NA	NA	NA	NA	NA	NA	NA	0.88	<2.2e-16	NA	NA	0.77	<2.2e-16	0.61	<2.2e-16	NA	NA
YY1	GM12878	TSS	protein coding	NA	NA	NA	NA	0.53	<2.2e-16	0.39	<2.2e-16	NA	NA	0.18	<2.2e-16	0.28	<2.2e-16	0.36	<2.2e-16	0.51	<2.2e-16	NA	NA	0.38	<2.2e-16	0.45	<2.2e-16	NA	NA	NA	NA	NA	NA	NA	NA	NA	NA	NA	NA	0.6	<2.2e-16	NA	NA	0.51	<2.2e-16	0.4	<2.2e-16	NA	NA
ZBTB33	GM12878	TSS	protein coding	NA	NA	NA	NA	0.25	<2.2e-16	0.11	<2.2e-16	NA	NA	0.13	<2.2e-16	0.22	<2.2e-16	0.14	<2.2e-16	0.2	<2.2e-16	NA	NA	0.14	<2.2e-16	0.7	<2.2e-16	NA	NA	NA	NA	NA	NA	NA	NA	NA	NA	NA	NA	0.24	<2.2e-16	NA	NA	0.18	<2.2e-16	0.74	<2.2e-16	NA	NA
ZEB1	GM12878	TSS	protein coding	NA	NA	NA	NA	0.45	<2.2e-16	0.37	<2.2e-16	NA	NA	0.11	<2.2e-16	0.29	<2.2e-16	0.4	<2.2e-16	0.5	<2.2e-16	NA	NA	0.48	<2.2e-16	0.47	<2.2e-16	NA	NA	NA	NA	NA	NA	NA	NA	NA	NA	NA	NA	0.58	<2.2e-16	NA	NA	0.48	<2.2e-16	0.41	<2.2e-16	NA	NA
ZNF143	GM12878	TSS	protein coding	NA	NA	NA	NA	0.23	<2.2e-16	0.31	<2.2e-16	NA	NA	0.03	0.0003	0.08	<2.2e-16	0.16	<2.2e-16	0.36	<2.2e-16	NA	NA	0.22	<2.2e-16	0.28	<2.2e-16	NA	NA	NA	NA	NA	NA	NA	NA	NA	NA	NA	NA	0.3	<2.2e-16	NA	NA	0.22	<2.2e-16	0.3	<2.2e-16	NA	NA
ZNF274	GM12878	TSS	protein coding	NA	NA	NA	NA	0.29	<2.2e-16	0.3	<2.2e-16	NA	NA	0.04	2e-07	0.06	3e-16	0.21	<2.2e-16	0.29	<2.2e-16	NA	NA	0.24	<2.2e-16	0.33	<2.2e-16	NA	NA	NA	NA	NA	NA	NA	NA	NA	NA	NA	NA	0.36	<2.2e-16	NA	NA	0.31	<2.2e-16	0.23	<2.2e-16	NA	NA
ZNF384	GM12878	TSS	protein coding	NA	NA	NA	NA	0.59	<2.2e-16	0.41	<2.2e-16	NA	NA	0.2	<2.2e-16	0.37	<2.2e-16	0.43	<2.2e-16	0.59	<2.2e-16	NA	NA	0.52	<2.2e-16	0.52	<2.2e-16	NA	NA	NA	NA	NA	NA	NA	NA	NA	NA	NA	NA	0.68	<2.2e-16	NA	NA	0.6	<2.2e-16	0.46	<2.2e-16	NA	NA
ZZZ3	GM12878	TSS	protein coding	NA	NA	NA	NA	0.41	<2.2e-16	0.35	<2.2e-16	NA	NA	0.07	<2.2e-16	0.17	<2.2e-16	0.33	<2.2e-16	0.51	<2.2e-16	NA	NA	0.3	<2.2e-16	0.43	<2.2e-16	NA	NA	NA	NA	NA	NA	NA	NA	NA	NA	NA	NA	0.49	<2.2e-16	NA	NA	0.39	<2.2e-16	0.33	<2.2e-16	NA	NA
DNASE HYPERSENSITIVITY	GM12878	TSS	protein coding	NA	NA	NA	NA	0.7	<2.2e-16	0.54	<2.2e-16	NA	NA	0.18	<2.2e-16	0.41	<2.2e-16	0.52	<2.2e-16	0.69	<2.2e-16	NA	NA	0.66	<2.2e-16	0.66	<2.2e-16	NA	NA	NA	NA	NA	NA	NA	NA	NA	NA	NA	NA	0.8	<2.2e-16	NA	NA	0.71	<2.2e-16	0.68	<2.2e-16	NA	NA
ATF2	GM12878	Transcript	protein coding	NA	NA	NA	NA	NA	NA	0.52	<2.2e-16	NA	NA	0.38	<2.2e-16	0.69	<2.2e-16	0.65	<2.2e-16	0.87	<2.2e-16	NA	NA	0.73	<2.2e-16	0.64	<2.2e-16	NA	NA	NA	NA	NA	NA	NA	NA	NA	NA	NA	NA	0.8	<2.2e-16	NA	NA	0.76	<2.2e-16	0.72	<2.2e-16	NA	NA
ATF3	GM12878	Transcript	protein coding	NA	NA	NA	NA	0.52	<2.2e-16	NA	NA	NA	NA	0.13	<2.2e-16	0.28	<2.2e-16	0.43	<2.2e-16	0.54	<2.2e-16	NA	NA	0.59	<2.2e-16	0.59	<2.2e-16	NA	NA	NA	NA	NA	NA	NA	NA	NA	NA	NA	NA	0.61	<2.2e-16	NA	NA	0.58	<2.2e-16	0.56	<2.2e-16	NA	NA
BATF	GM12878	Transcript	protein coding	NA	NA	NA	NA	0.38	<2.2e-16	0.13	<2.2e-16	NA	NA	NA	NA	0.65	<2.2e-16	0.2	<2.2e-16	0.24	<2.2e-16	NA	NA	0.2	<2.2e-16	0.07	<2.2e-16	NA	NA	NA	NA	NA	NA	NA	NA	NA	NA	NA	NA	0.35	<2.2e-16	NA	NA	0.18	<2.2e-16	0.13	<2.2e-16	NA	NA
BCL11A	GM12878	Transcript	protein coding	NA	NA	NA	NA	0.69	<2.2e-16	0.28	<2.2e-16	NA	NA	0.65	<2.2e-16	NA	NA	0.47	<2.2e-16	0.6	<2.2e-16	NA	NA	0.48	<2.2e-16	0.32	<2.2e-16	NA	NA	NA	NA	NA	NA	NA	NA	NA	NA	NA	NA	0.61	<2.2e-16	NA	NA	0.47	<2.2e-16	0.43	<2.2e-16	NA	NA
BCL3	GM12878	Transcript	protein coding	NA	NA	NA	NA	0.65	<2.2e-16	0.43	<2.2e-16	NA	NA	0.2	<2.2e-16	0.47	<2.2e-16	NA	NA	0.65	<2.2e-16	NA	NA	0.58	<2.2e-16	0.57	<2.2e-16	NA	NA	NA	NA	NA	NA	NA	NA	NA	NA	NA	NA	0.64	<2.2e-16	NA	NA	0.58	<2.2e-16	0.58	<2.2e-16	NA	NA
BCLAF1	GM12878	Transcript	protein coding	NA	NA	NA	NA	0.87	<2.2e-16	0.54	<2.2e-16	NA	NA	0.24	<2.2e-16	0.6	<2.2e-16	0.65	<2.2e-16	NA	NA	NA	NA	0.75	<2.2e-16	0.67	<2.2e-16	NA	NA	NA	NA	NA	NA	NA	NA	NA	NA	NA	NA	0.79	<2.2e-16	NA	NA	0.81	<2.2e-16	0.75	<2.2e-16	NA	NA
BHLHE40	GM12878	Transcript	protein coding	NA	NA	NA	NA	0.73	<2.2e-16	0.59	<2.2e-16	NA	NA	0.2	<2.2e-16	0.48	<2.2e-16	0.58	<2.2e-16	0.75	<2.2e-16	NA	NA	NA	NA	0.74	<2.2e-16	NA	NA	NA	NA	NA	NA	NA	NA	NA	NA	NA	NA	0.75	<2.2e-16	NA	NA	0.84	<2.2e-16	0.77	<2.2e-16	NA	NA
BRCA1	GM12878	Transcript	protein coding	NA	NA	NA	NA	0.64	<2.2e-16	0.59	<2.2e-16	NA	NA	0.07	<2.2e-16	0.32	<2.2e-16	0.57	<2.2e-16	0.67	<2.2e-16	NA	NA	0.74	<2.2e-16	NA	NA	NA	NA	NA	NA	NA	NA	NA	NA	NA	NA	NA	NA	0.7	<2.2e-16	NA	NA	0.79	<2.2e-16	0.86	<2.2e-16	NA	NA
CEBPB	GM12878	Transcript	protein coding	NA	NA	NA	NA	0.8	<2.2e-16	0.61	<2.2e-16	NA	NA	0.35	<2.2e-16	0.61	<2.2e-16	0.64	<2.2e-16	0.79	<2.2e-16	NA	NA	0.75	<2.2e-16	0.7	<2.2e-16	NA	NA	NA	NA	NA	NA	NA	NA	NA	NA	NA	NA	NA	NA	NA	NA	0.8	<2.2e-16	0.74	<2.2e-16	NA	NA
CHD1	GM12878	Transcript	protein coding	NA	NA	NA	NA	0.76	<2.2e-16	0.58	<2.2e-16	NA	NA	0.18	<2.2e-16	0.47	<2.2e-16	0.58	<2.2e-16	0.81	<2.2e-16	NA	NA	0.84	<2.2e-16	0.79	<2.2e-16	NA	NA	NA	NA	NA	NA	NA	NA	NA	NA	NA	NA	0.8	<2.2e-16	NA	NA	NA	NA	0.8	<2.2e-16	NA	NA
CHD2	GM12878	Transcript	protein coding	NA	NA	NA	NA	0.72	<2.2e-16	0.56	<2.2e-16	NA	NA	0.13	<2.2e-16	0.43	<2.2e-16	0.58	<2.2e-16	0.75	<2.2e-16	NA	NA	0.77	<2.2e-16	0.86	<2.2e-16	NA	NA	NA	NA	NA	NA	NA	NA	NA	NA	NA	NA	0.74	<2.2e-16	NA	NA	0.8	<2.2e-16	NA	NA	NA	NA
COREST-RCOR1	GM12878	Transcript	protein coding	NA	NA	NA	NA	0.76	<2.2e-16	0.64	<2.2e-16	NA	NA	0.21	<2.2e-16	0.46	<2.2e-16	0.61	<2.2e-16	0.79	<2.2e-16	NA	NA	0.85	<2.2e-16	0.86	<2.2e-16	NA	NA	NA	NA	NA	NA	NA	NA	NA	NA	NA	NA	0.84	<2.2e-16	NA	NA	0.89	<2.2e-16	0.85	<2.2e-16	NA	NA
CREB1	GM12878	Transcript	protein coding	NA	NA	NA	NA	0.76	<2.2e-16	0.65	<2.2e-16	NA	NA	0.14	<2.2e-16	0.44	<2.2e-16	0.6	<2.2e-16	0.79	<2.2e-16	NA	NA	0.76	<2.2e-16	0.76	<2.2e-16	NA	NA	NA	NA	NA	NA	NA	NA	NA	NA	NA	NA	0.8	<2.2e-16	NA	NA	0.78	<2.2e-16	0.8	<2.2e-16	NA	NA
CTCF	GM12878	Transcript	protein coding	NA	NA	NA	NA	0.36	<2.2e-16	0.35	<2.2e-16	NA	NA	0.04	2e-07	0.2	<2.2e-16	0.32	<2.2e-16	0.44	<2.2e-16	NA	NA	0.49	<2.2e-16	0.49	<2.2e-16	NA	NA	NA	NA	NA	NA	NA	NA	NA	NA	NA	NA	0.44	<2.2e-16	NA	NA	0.45	<2.2e-16	0.46	<2.2e-16	NA	NA
CUX1	GM12878	Transcript	protein coding	NA	NA	NA	NA	0.68	<2.2e-16	0.59	<2.2e-16	NA	NA	0.23	<2.2e-16	0.39	<2.2e-16	0.53	<2.2e-16	0.66	<2.2e-16	NA	NA	0.72	<2.2e-16	0.73	<2.2e-16	NA	NA	NA	NA	NA	NA	NA	NA	NA	NA	NA	NA	0.74	<2.2e-16	NA	NA	0.79	<2.2e-16	0.68	<2.2e-16	NA	NA
E2F4	GM12878	Transcript	protein coding	NA	NA	NA	NA	0.65	<2.2e-16	0.61	<2.2e-16	NA	NA	0.12	<2.2e-16	0.35	<2.2e-16	0.53	<2.2e-16	0.69	<2.2e-16	NA	NA	0.74	<2.2e-16	0.78	<2.2e-16	NA	NA	NA	NA	NA	NA	NA	NA	NA	NA	NA	NA	0.73	<2.2e-16	NA	NA	0.81	<2.2e-16	0.76	<2.2e-16	NA	NA
EBF1	GM12878	Transcript	protein coding	NA	NA	NA	NA	0.53	<2.2e-16	0.29	<2.2e-16	NA	NA	0.31	<2.2e-16	0.59	<2.2e-16	0.43	<2.2e-16	0.53	<2.2e-16	NA	NA	0.54	<2.2e-16	0.41	<2.2e-16	NA	NA	NA	NA	NA	NA	NA	NA	NA	NA	NA	NA	0.56	<2.2e-16	NA	NA	0.47	<2.2e-16	0.49	<2.2e-16	NA	NA
EGR1	GM12878	Transcript	protein coding	NA	NA	NA	NA	0.65	<2.2e-16	0.5	<2.2e-16	NA	NA	0.11	<2.2e-16	0.43	<2.2e-16	0.57	<2.2e-16	0.72	<2.2e-16	NA	NA	0.72	<2.2e-16	0.68	<2.2e-16	NA	NA	NA	NA	NA	NA	NA	NA	NA	NA	NA	NA	0.68	<2.2e-16	NA	NA	0.71	<2.2e-16	0.73	<2.2e-16	NA	NA
ELF1	GM12878	Transcript	protein coding	NA	NA	NA	NA	0.68	<2.2e-16	0.55	<2.2e-16	NA	NA	0.08	<2.2e-16	0.4	<2.2e-16	0.56	<2.2e-16	0.78	<2.2e-16	NA	NA	0.68	<2.2e-16	0.67	<2.2e-16	NA	NA	NA	NA	NA	NA	NA	NA	NA	NA	NA	NA	0.68	<2.2e-16	NA	NA	0.69	<2.2e-16	0.76	<2.2e-16	NA	NA
ELK1	GM12878	Transcript	protein coding	NA	NA	NA	NA	0.71	<2.2e-16	0.64	<2.2e-16	NA	NA	0.13	<2.2e-16	0.38	<2.2e-16	0.58	<2.2e-16	0.77	<2.2e-16	NA	NA	0.8	<2.2e-16	0.84	<2.2e-16	NA	NA	NA	NA	NA	NA	NA	NA	NA	NA	NA	NA	0.77	<2.2e-16	NA	NA	0.84	<2.2e-16	0.8	<2.2e-16	NA	NA
ESRRA	GM12878	Transcript	protein coding	NA	NA	NA	NA	0.71	<2.2e-16	0.65	<2.2e-16	NA	NA	0.16	<2.2e-16	0.39	<2.2e-16	0.59	<2.2e-16	0.75	<2.2e-16	NA	NA	0.81	<2.2e-16	0.84	<2.2e-16	NA	NA	NA	NA	NA	NA	NA	NA	NA	NA	NA	NA	0.8	<2.2e-16	NA	NA	0.86	<2.2e-16	0.8	<2.2e-16	NA	NA
ETS1	GM12878	Transcript	protein coding	NA	NA	NA	NA	0.68	<2.2e-16	0.54	<2.2e-16	NA	NA	0.13	<2.2e-16	0.42	<2.2e-16	0.49	<2.2e-16	0.77	<2.2e-16	NA	NA	0.64	<2.2e-16	0.61	<2.2e-16	NA	NA	NA	NA	NA	NA	NA	NA	NA	NA	NA	NA	0.66	<2.2e-16	NA	NA	0.66	<2.2e-16	0.71	<2.2e-16	NA	NA
EZH2	GM12878	Transcript	protein coding	NA	NA	NA	NA	0.26	<2.2e-16	0.24	<2.2e-16	NA	NA	0.16	<2.2e-16	0.19	<2.2e-16	0.14	<2.2e-16	0.23	<2.2e-16	NA	NA	0.27	<2.2e-16	0.31	<2.2e-16	NA	NA	NA	NA	NA	NA	NA	NA	NA	NA	NA	NA	0.29	<2.2e-16	NA	NA	0.32	<2.2e-16	0.23	<2.2e-16	NA	NA
FAM48A	GM12878	Transcript	protein coding	NA	NA	NA	NA	0.32	<2.2e-16	0.42	<2.2e-16	NA	NA	0.04	5e-07	0.06	<2.2e-16	0.28	<2.2e-16	0.3	<2.2e-16	NA	NA	0.39	<2.2e-16	0.52	<2.2e-16	NA	NA	NA	NA	NA	NA	NA	NA	NA	NA	NA	NA	0.36	<2.2e-16	NA	NA	0.47	<2.2e-16	0.36	<2.2e-16	NA	NA
FOS (AND EGFP-FOS)	GM12878	Transcript	protein coding	NA	NA	NA	NA	0.57	<2.2e-16	0.57	<2.2e-16	NA	NA	0.14	<2.2e-16	0.33	<2.2e-16	0.46	<2.2e-16	0.57	<2.2e-16	NA	NA	0.62	<2.2e-16	0.63	<2.2e-16	NA	NA	NA	NA	NA	NA	NA	NA	NA	NA	NA	NA	0.63	<2.2e-16	NA	NA	0.65	<2.2e-16	0.67	<2.2e-16	NA	NA
FOXM1	GM12878	Transcript	protein coding	NA	NA	NA	NA	0.89	<2.2e-16	0.52	<2.2e-16	NA	NA	0.39	<2.2e-16	0.73	<2.2e-16	0.63	<2.2e-16	0.87	<2.2e-16	NA	NA	0.74	<2.2e-16	0.64	<2.2e-16	NA	NA	NA	NA	NA	NA	NA	NA	NA	NA	NA	NA	0.86	<2.2e-16	NA	NA	0.78	<2.2e-16	0.73	<2.2e-16	NA	NA
GABP	GM12878	Transcript	protein coding	NA	NA	NA	NA	0.32	<2.2e-16	0.23	<2.2e-16	NA	NA	0.12	<2.2e-16	0.3	<2.2e-16	0.23	<2.2e-16	0.43	<2.2e-16	NA	NA	0.28	<2.2e-16	0.23	<2.2e-16	NA	NA	NA	NA	NA	NA	NA	NA	NA	NA	NA	NA	0.38	<2.2e-16	NA	NA	0.27	<2.2e-16	0.34	<2.2e-16	NA	NA
H2AZ	GM12878	Transcript	protein coding	NA	NA	NA	NA	0.49	<2.2e-16	0.5	<2.2e-16	NA	NA	0.09	<2.2e-16	0.31	<2.2e-16	0.36	<2.2e-16	0.57	<2.2e-16	NA	NA	0.63	<2.2e-16	0.62	<2.2e-16	NA	NA	NA	NA	NA	NA	NA	NA	NA	NA	NA	NA	0.64	<2.2e-16	NA	NA	0.62	<2.2e-16	0.63	<2.2e-16	NA	NA
H3K27AC	GM12878	Transcript	protein coding	NA	NA	NA	NA	0.8	<2.2e-16	0.53	<2.2e-16	NA	NA	0.26	<2.2e-16	0.58	<2.2e-16	0.58	<2.2e-16	0.82	<2.2e-16	NA	NA	0.74	<2.2e-16	0.67	<2.2e-16	NA	NA	NA	NA	NA	NA	NA	NA	NA	NA	NA	NA	0.83	<2.2e-16	NA	NA	0.82	<2.2e-16	0.75	<2.2e-16	NA	NA
H3K27ME3	GM12878	Transcript	protein coding	NA	NA	NA	NA	-0.19	<2.2e-16	-0.18	<2.2e-16	NA	NA	-0.07	<2.2e-16	-0.12	<2.2e-16	-0.2	<2.2e-16	-0.19	<2.2e-16	NA	NA	-0.17	<2.2e-16	-0.07	<2.2e-16	NA	NA	NA	NA	NA	NA	NA	NA	NA	NA	NA	NA	-0.29	<2.2e-16	NA	NA	-0.16	<2.2e-16	-0.18	<2.2e-16	NA	NA
H3K36ME3	GM12878	Transcript	protein coding	NA	NA	NA	NA	0.3	<2.2e-16	0.37	<2.2e-16	NA	NA	0.13	<2.2e-16	0.16	<2.2e-16	0.31	<2.2e-16	0.3	<2.2e-16	NA	NA	0.31	<2.2e-16	0.32	<2.2e-16	NA	NA	NA	NA	NA	NA	NA	NA	NA	NA	NA	NA	0.49	<2.2e-16	NA	NA	0.37	<2.2e-16	0.32	<2.2e-16	NA	NA
H3K4ME1	GM12878	Transcript	protein coding	NA	NA	NA	NA	0.58	<2.2e-16	0.48	<2.2e-16	NA	NA	0.33	<2.2e-16	0.44	<2.2e-16	0.5	<2.2e-16	0.52	<2.2e-16	NA	NA	0.61	<2.2e-16	0.61	<2.2e-16	NA	NA	NA	NA	NA	NA	NA	NA	NA	NA	NA	NA	0.76	<2.2e-16	NA	NA	0.57	<2.2e-16	0.57	<2.2e-16	NA	NA
H3K4ME2	GM12878	Transcript	protein coding	NA	NA	NA	NA	0.68	<2.2e-16	0.56	<2.2e-16	NA	NA	0.19	<2.2e-16	0.46	<2.2e-16	0.55	<2.2e-16	0.73	<2.2e-16	NA	NA	0.77	<2.2e-16	0.74	<2.2e-16	NA	NA	NA	NA	NA	NA	NA	NA	NA	NA	NA	NA	0.82	<2.2e-16	NA	NA	0.79	<2.2e-16	0.77	<2.2e-16	NA	NA
H3K4ME3	GM12878	Transcript	protein coding	NA	NA	NA	NA	0.69	<2.2e-16	0.58	<2.2e-16	NA	NA	0.15	<2.2e-16	0.45	<2.2e-16	0.53	<2.2e-16	0.78	<2.2e-16	NA	NA	0.74	<2.2e-16	0.71	<2.2e-16	NA	NA	NA	NA	NA	NA	NA	NA	NA	NA	NA	NA	0.81	<2.2e-16	NA	NA	0.82	<2.2e-16	0.78	<2.2e-16	NA	NA
H3K79ME2	GM12878	Transcript	protein coding	NA	NA	NA	NA	0.59	<2.2e-16	0.49	<2.2e-16	NA	NA	0.16	<2.2e-16	0.34	<2.2e-16	0.47	<2.2e-16	0.62	<2.2e-16	NA	NA	0.59	<2.2e-16	0.56	<2.2e-16	NA	NA	NA	NA	NA	NA	NA	NA	NA	NA	NA	NA	0.72	<2.2e-16	NA	NA	0.69	<2.2e-16	0.61	<2.2e-16	NA	NA
H3K9AC	GM12878	Transcript	protein coding	NA	NA	NA	NA	0.73	<2.2e-16	0.56	<2.2e-16	NA	NA	0.14	<2.2e-16	0.48	<2.2e-16	0.55	<2.2e-16	0.82	<2.2e-16	NA	NA	0.74	<2.2e-16	0.71	<2.2e-16	NA	NA	NA	NA	NA	NA	NA	NA	NA	NA	NA	NA	0.8	<2.2e-16	NA	NA	0.83	<2.2e-16	0.8	<2.2e-16	NA	NA
H3K9ME3	GM12878	Transcript	protein coding	NA	NA	NA	NA	0.1	<2.2e-16	0.06	3e-15	NA	NA	0.14	<2.2e-16	0.13	<2.2e-16	0.05	3e-14	0.07	<2.2e-16	NA	NA	0.06	5e-16	0.05	3e-13	NA	NA	NA	NA	NA	NA	NA	NA	NA	NA	NA	NA	0.12	<2.2e-16	NA	NA	0.09	<2.2e-16	0.04	3e-09	NA	NA
H4K20ME1	GM12878	Transcript	protein coding	NA	NA	NA	NA	0.25	<2.2e-16	0.27	<2.2e-16	NA	NA	0.07	<2.2e-16	0.16	<2.2e-16	0.31	<2.2e-16	0.29	<2.2e-16	NA	NA	0.31	<2.2e-16	0.44	<2.2e-16	NA	NA	NA	NA	NA	NA	NA	NA	NA	NA	NA	NA	0.4	<2.2e-16	NA	NA	0.37	<2.2e-16	0.36	<2.2e-16	NA	NA
IKZF1	GM12878	Transcript	protein coding	NA	NA	NA	NA	0.54	<2.2e-16	0.43	<2.2e-16	NA	NA	0.32	<2.2e-16	0.36	<2.2e-16	0.37	<2.2e-16	0.45	<2.2e-16	NA	NA	0.5	<2.2e-16	0.47	<2.2e-16	NA	NA	NA	NA	NA	NA	NA	NA	NA	NA	NA	NA	0.56	<2.2e-16	NA	NA	0.56	<2.2e-16	0.41	<2.2e-16	NA	NA
IRF3	GM12878	Transcript	protein coding	NA	NA	NA	NA	0.57	<2.2e-16	0.57	<2.2e-16	NA	NA	0.13	<2.2e-16	0.26	<2.2e-16	0.47	<2.2e-16	0.56	<2.2e-16	NA	NA	0.64	<2.2e-16	0.74	<2.2e-16	NA	NA	NA	NA	NA	NA	NA	NA	NA	NA	NA	NA	0.63	<2.2e-16	NA	NA	0.73	<2.2e-16	0.65	<2.2e-16	NA	NA
IRF4	GM12878	Transcript	protein coding	NA	NA	NA	NA	0.59	<2.2e-16	0.28	<2.2e-16	NA	NA	0.59	<2.2e-16	0.78	<2.2e-16	0.38	<2.2e-16	0.56	<2.2e-16	NA	NA	0.44	<2.2e-16	0.29	<2.2e-16	NA	NA	NA	NA	NA	NA	NA	NA	NA	NA	NA	NA	0.57	<2.2e-16	NA	NA	0.43	<2.2e-16	0.42	<2.2e-16	NA	NA
JUND (AND EGFP-JUND)	GM12878	Transcript	protein coding	NA	NA	NA	NA	0.67	<2.2e-16	0.59	<2.2e-16	NA	NA	0.17	<2.2e-16	0.37	<2.2e-16	0.56	<2.2e-16	0.68	<2.2e-16	NA	NA	0.8	<2.2e-16	0.86	<2.2e-16	NA	NA	NA	NA	NA	NA	NA	NA	NA	NA	NA	NA	0.71	<2.2e-16	NA	NA	0.85	<2.2e-16	0.77	<2.2e-16	NA	NA
KAT2A-GCN5	GM12878	Transcript	protein coding	NA	NA	NA	NA	0.55	<2.2e-16	0.55	<2.2e-16	NA	NA	0.06	<2.2e-16	0.23	<2.2e-16	0.45	<2.2e-16	0.58	<2.2e-16	NA	NA	0.61	<2.2e-16	0.72	<2.2e-16	NA	NA	NA	NA	NA	NA	NA	NA	NA	NA	NA	NA	0.6	<2.2e-16	NA	NA	0.73	<2.2e-16	0.62	<2.2e-16	NA	NA
MAFK	GM12878	Transcript	protein coding	NA	NA	NA	NA	0.68	<2.2e-16	0.64	<2.2e-16	NA	NA	0.15	<2.2e-16	0.35	<2.2e-16	0.57	<2.2e-16	0.7	<2.2e-16	NA	NA	0.77	<2.2e-16	0.84	<2.2e-16	NA	NA	NA	NA	NA	NA	NA	NA	NA	NA	NA	NA	0.77	<2.2e-16	NA	NA	0.83	<2.2e-16	0.75	<2.2e-16	NA	NA
MAX	GM12878	Transcript	protein coding	NA	NA	NA	NA	0.73	<2.2e-16	0.64	<2.2e-16	NA	NA	0.13	<2.2e-16	0.43	<2.2e-16	0.6	<2.2e-16	0.8	<2.2e-16	NA	NA	0.87	<2.2e-16	0.84	<2.2e-16	NA	NA	NA	NA	NA	NA	NA	NA	NA	NA	NA	NA	0.8	<2.2e-16	NA	NA	0.86	<2.2e-16	0.85	<2.2e-16	NA	NA
MAZ	GM12878	Transcript	protein coding	NA	NA	NA	NA	0.7	<2.2e-16	0.59	<2.2e-16	NA	NA	0.12	<2.2e-16	0.42	<2.2e-16	0.59	<2.2e-16	0.77	<2.2e-16	NA	NA	0.84	<2.2e-16	0.81	<2.2e-16	NA	NA	NA	NA	NA	NA	NA	NA	NA	NA	NA	NA	0.77	<2.2e-16	NA	NA	0.84	<2.2e-16	0.85	<2.2e-16	NA	NA
MEF2A	GM12878	Transcript	protein coding	NA	NA	NA	NA	0.8	<2.2e-16	0.52	<2.2e-16	NA	NA	0.35	<2.2e-16	0.58	<2.2e-16	0.56	<2.2e-16	0.76	<2.2e-16	NA	NA	0.68	<2.2e-16	0.6	<2.2e-16	NA	NA	NA	NA	NA	NA	NA	NA	NA	NA	NA	NA	0.75	<2.2e-16	NA	NA	0.72	<2.2e-16	0.64	<2.2e-16	NA	NA
MEF2C	GM12878	Transcript	protein coding	NA	NA	NA	NA	0.76	<2.2e-16	0.46	<2.2e-16	NA	NA	0.35	<2.2e-16	0.59	<2.2e-16	0.53	<2.2e-16	0.72	<2.2e-16	NA	NA	0.65	<2.2e-16	0.55	<2.2e-16	NA	NA	NA	NA	NA	NA	NA	NA	NA	NA	NA	NA	0.68	<2.2e-16	NA	NA	0.65	<2.2e-16	0.61	<2.2e-16	NA	NA
MTA3	GM12878	Transcript	protein coding	NA	NA	NA	NA	0.86	<2.2e-16	0.52	<2.2e-16	NA	NA	0.21	<2.2e-16	0.59	<2.2e-16	0.72	<2.2e-16	0.9	<2.2e-16	NA	NA	0.75	<2.2e-16	0.69	<2.2e-16	NA	NA	NA	NA	NA	NA	NA	NA	NA	NA	NA	NA	0.81	<2.2e-16	NA	NA	0.79	<2.2e-16	0.77	<2.2e-16	NA	NA
MXI1	GM12878	Transcript	protein coding	NA	NA	NA	NA	0.73	<2.2e-16	0.64	<2.2e-16	NA	NA	0.14	<2.2e-16	0.43	<2.2e-16	0.58	<2.2e-16	0.8	<2.2e-16	NA	NA	0.84	<2.2e-16	0.8	<2.2e-16	NA	NA	NA	NA	NA	NA	NA	NA	NA	NA	NA	NA	0.79	<2.2e-16	NA	NA	0.86	<2.2e-16	0.84	<2.2e-16	NA	NA
MYC	GM12878	Transcript	protein coding	NA	NA	NA	NA	0.61	<2.2e-16	0.52	<2.2e-16	NA	NA	0.08	<2.2e-16	0.39	<2.2e-16	0.54	<2.2e-16	0.7	<2.2e-16	NA	NA	0.72	<2.2e-16	0.76	<2.2e-16	NA	NA	NA	NA	NA	NA	NA	NA	NA	NA	NA	NA	0.71	<2.2e-16	NA	NA	0.72	<2.2e-16	0.75	<2.2e-16	NA	NA
NFATC1	GM12878	Transcript	protein coding	NA	NA	NA	NA	0.83	<2.2e-16	0.48	<2.2e-16	NA	NA	0.22	<2.2e-16	0.59	<2.2e-16	0.73	<2.2e-16	0.85	<2.2e-16	NA	NA	0.66	<2.2e-16	0.62	<2.2e-16	NA	NA	NA	NA	NA	NA	NA	NA	NA	NA	NA	NA	0.75	<2.2e-16	NA	NA	0.74	<2.2e-16	0.69	<2.2e-16	NA	NA
NFE2	GM12878	Transcript	protein coding	NA	NA	NA	NA	0.52	<2.2e-16	0.62	<2.2e-16	NA	NA	0.09	<2.2e-16	0.22	<2.2e-16	0.45	<2.2e-16	0.52	<2.2e-16	NA	NA	0.64	<2.2e-16	0.72	<2.2e-16	NA	NA	NA	NA	NA	NA	NA	NA	NA	NA	NA	NA	0.59	<2.2e-16	NA	NA	0.67	<2.2e-16	0.59	<2.2e-16	NA	NA
NFIC	GM12878	Transcript	protein coding	NA	NA	NA	NA	0.89	<2.2e-16	0.5	<2.2e-16	NA	NA	0.46	<2.2e-16	0.75	<2.2e-16	0.61	<2.2e-16	0.81	<2.2e-16	NA	NA	0.7	<2.2e-16	0.58	<2.2e-16	NA	NA	NA	NA	NA	NA	NA	NA	NA	NA	NA	NA	0.84	<2.2e-16	NA	NA	0.74	<2.2e-16	0.66	<2.2e-16	NA	NA
NFYA	GM12878	Transcript	protein coding	NA	NA	NA	NA	0.38	<2.2e-16	0.44	<2.2e-16	NA	NA	0.06	<2.2e-16	0.12	<2.2e-16	0.3	<2.2e-16	0.35	<2.2e-16	NA	NA	0.43	<2.2e-16	0.52	<2.2e-16	NA	NA	NA	NA	NA	NA	NA	NA	NA	NA	NA	NA	0.42	<2.2e-16	NA	NA	0.51	<2.2e-16	0.46	<2.2e-16	NA	NA
NFYB	GM12878	Transcript	protein coding	NA	NA	NA	NA	0.39	<2.2e-16	0.35	<2.2e-16	NA	NA	0.06	6e-15	0.22	<2.2e-16	0.3	<2.2e-16	0.39	<2.2e-16	NA	NA	0.43	<2.2e-16	0.42	<2.2e-16	NA	NA	NA	NA	NA	NA	NA	NA	NA	NA	NA	NA	0.42	<2.2e-16	NA	NA	0.46	<2.2e-16	0.54	<2.2e-16	NA	NA
NRF1	GM12878	Transcript	protein coding	NA	NA	NA	NA	0.58	<2.2e-16	0.59	<2.2e-16	NA	NA	0.08	<2.2e-16	0.29	<2.2e-16	0.48	<2.2e-16	0.63	<2.2e-16	NA	NA	0.71	<2.2e-16	0.74	<2.2e-16	NA	NA	NA	NA	NA	NA	NA	NA	NA	NA	NA	NA	0.66	<2.2e-16	NA	NA	0.72	<2.2e-16	0.73	<2.2e-16	NA	NA
NRSF-REST	GM12878	Transcript	protein coding	NA	NA	NA	NA	0.11	<2.2e-16	0.06	5e-16	NA	NA	0.05	7e-12	0.12	<2.2e-16	0.08	<2.2e-16	0.13	<2.2e-16	NA	NA	0.1	<2.2e-16	0.11	<2.2e-16	NA	NA	NA	NA	NA	NA	NA	NA	NA	NA	NA	NA	0.11	<2.2e-16	NA	NA	0.12	<2.2e-16	0.11	<2.2e-16	NA	NA
P300	GM12878	Transcript	protein coding	NA	NA	NA	NA	0.77	<2.2e-16	0.61	<2.2e-16	NA	NA	0.29	<2.2e-16	0.51	<2.2e-16	0.6	<2.2e-16	0.74	<2.2e-16	NA	NA	0.83	<2.2e-16	0.82	<2.2e-16	NA	NA	NA	NA	NA	NA	NA	NA	NA	NA	NA	NA	0.81	<2.2e-16	NA	NA	0.84	<2.2e-16	0.78	<2.2e-16	NA	NA
PAX5	GM12878	Transcript	protein coding	NA	NA	NA	NA	0.65	<2.2e-16	0.33	<2.2e-16	NA	NA	0.41	<2.2e-16	0.77	<2.2e-16	0.49	<2.2e-16	0.67	<2.2e-16	NA	NA	0.57	<2.2e-16	0.41	<2.2e-16	NA	NA	NA	NA	NA	NA	NA	NA	NA	NA	NA	NA	0.64	<2.2e-16	NA	NA	0.55	<2.2e-16	0.56	<2.2e-16	NA	NA
PBX3	GM12878	Transcript	protein coding	NA	NA	NA	NA	0.41	<2.2e-16	0.19	<2.2e-16	NA	NA	0.26	<2.2e-16	0.52	<2.2e-16	0.42	<2.2e-16	0.42	<2.2e-16	NA	NA	0.31	<2.2e-16	0.25	<2.2e-16	NA	NA	NA	NA	NA	NA	NA	NA	NA	NA	NA	NA	0.41	<2.2e-16	NA	NA	0.35	<2.2e-16	0.4	<2.2e-16	NA	NA
PML	GM12878	Transcript	protein coding	NA	NA	NA	NA	0.83	<2.2e-16	0.55	<2.2e-16	NA	NA	0.15	<2.2e-16	0.54	<2.2e-16	0.64	<2.2e-16	0.9	<2.2e-16	NA	NA	0.74	<2.2e-16	0.7	<2.2e-16	NA	NA	NA	NA	NA	NA	NA	NA	NA	NA	NA	NA	0.79	<2.2e-16	NA	NA	0.82	<2.2e-16	0.79	<2.2e-16	NA	NA
POL2	GM12878	Transcript	protein coding	NA	NA	NA	NA	0.79	<2.2e-16	0.56	<2.2e-16	NA	NA	0.15	<2.2e-16	0.5	<2.2e-16	0.63	<2.2e-16	0.86	<2.2e-16	NA	NA	0.74	<2.2e-16	0.72	<2.2e-16	NA	NA	NA	NA	NA	NA	NA	NA	NA	NA	NA	NA	0.8	<2.2e-16	NA	NA	0.85	<2.2e-16	0.8	<2.2e-16	NA	NA
POL3	GM12878	Transcript	protein coding	NA	NA	NA	NA	0.55	<2.2e-16	0.51	<2.2e-16	NA	NA	0.16	<2.2e-16	0.28	<2.2e-16	0.45	<2.2e-16	0.55	<2.2e-16	NA	NA	0.6	<2.2e-16	0.62	<2.2e-16	NA	NA	NA	NA	NA	NA	NA	NA	NA	NA	NA	NA	0.63	<2.2e-16	NA	NA	0.66	<2.2e-16	0.57	<2.2e-16	NA	NA
POU2F2	GM12878	Transcript	protein coding	NA	NA	NA	NA	0.71	<2.2e-16	0.39	<2.2e-16	NA	NA	0.28	<2.2e-16	0.67	<2.2e-16	0.55	<2.2e-16	0.76	<2.2e-16	NA	NA	0.58	<2.2e-16	0.49	<2.2e-16	NA	NA	NA	NA	NA	NA	NA	NA	NA	NA	NA	NA	0.69	<2.2e-16	NA	NA	0.67	<2.2e-16	0.63	<2.2e-16	NA	NA
RAD21	GM12878	Transcript	protein coding	NA	NA	NA	NA	0.57	<2.2e-16	0.52	<2.2e-16	NA	NA	0.18	<2.2e-16	0.34	<2.2e-16	0.46	<2.2e-16	0.58	<2.2e-16	NA	NA	0.63	<2.2e-16	0.67	<2.2e-16	NA	NA	NA	NA	NA	NA	NA	NA	NA	NA	NA	NA	0.65	<2.2e-16	NA	NA	0.66	<2.2e-16	0.59	<2.2e-16	NA	NA
RELA	GM12878	Transcript	protein coding	NA	NA	NA	NA	0.8	<2.2e-16	0.62	<2.2e-16	NA	NA	0.3	<2.2e-16	0.52	<2.2e-16	0.58	<2.2e-16	0.77	<2.2e-16	NA	NA	0.76	<2.2e-16	0.72	<2.2e-16	NA	NA	NA	NA	NA	NA	NA	NA	NA	NA	NA	NA	0.83	<2.2e-16	NA	NA	0.83	<2.2e-16	0.73	<2.2e-16	NA	NA
RFX5	GM12878	Transcript	protein coding	NA	NA	NA	NA	0.66	<2.2e-16	0.61	<2.2e-16	NA	NA	0.13	<2.2e-16	0.35	<2.2e-16	0.55	<2.2e-16	0.69	<2.2e-16	NA	NA	0.77	<2.2e-16	0.83	<2.2e-16	NA	NA	NA	NA	NA	NA	NA	NA	NA	NA	NA	NA	0.73	<2.2e-16	NA	NA	0.82	<2.2e-16	0.78	<2.2e-16	NA	NA
RUNX3	GM12878	Transcript	protein coding	NA	NA	NA	NA	0.85	<2.2e-16	0.54	<2.2e-16	NA	NA	0.35	<2.2e-16	0.65	<2.2e-16	0.6	<2.2e-16	0.82	<2.2e-16	NA	NA	0.76	<2.2e-16	0.66	<2.2e-16	NA	NA	NA	NA	NA	NA	NA	NA	NA	NA	NA	NA	0.81	<2.2e-16	NA	NA	0.76	<2.2e-16	0.73	<2.2e-16	NA	NA
RXRA	GM12878	Transcript	protein coding	NA	NA	NA	NA	0.57	<2.2e-16	0.36	<2.2e-16	NA	NA	0.37	<2.2e-16	0.62	<2.2e-16	0.42	<2.2e-16	0.59	<2.2e-16	NA	NA	0.47	<2.2e-16	0.34	<2.2e-16	NA	NA	NA	NA	NA	NA	NA	NA	NA	NA	NA	NA	0.64	<2.2e-16	NA	NA	0.49	<2.2e-16	0.48	<2.2e-16	NA	NA
SIN3A	GM12878	Transcript	protein coding	NA	NA	NA	NA	0.72	<2.2e-16	0.64	<2.2e-16	NA	NA	0.12	<2.2e-16	0.41	<2.2e-16	0.58	<2.2e-16	0.79	<2.2e-16	NA	NA	0.82	<2.2e-16	0.81	<2.2e-16	NA	NA	NA	NA	NA	NA	NA	NA	NA	NA	NA	NA	0.79	<2.2e-16	NA	NA	0.86	<2.2e-16	0.84	<2.2e-16	NA	NA
SIX5	GM12878	Transcript	protein coding	NA	NA	NA	NA	0.41	<2.2e-16	0.44	<2.2e-16	NA	NA	0.06	<2.2e-16	0.21	<2.2e-16	0.3	<2.2e-16	0.5	<2.2e-16	NA	NA	0.43	<2.2e-16	0.45	<2.2e-16	NA	NA	NA	NA	NA	NA	NA	NA	NA	NA	NA	NA	0.46	<2.2e-16	NA	NA	0.44	<2.2e-16	0.51	<2.2e-16	NA	NA
SMC3	GM12878	Transcript	protein coding	NA	NA	NA	NA	0.64	<2.2e-16	0.56	<2.2e-16	NA	NA	0.17	<2.2e-16	0.37	<2.2e-16	0.53	<2.2e-16	0.67	<2.2e-16	NA	NA	0.72	<2.2e-16	0.76	<2.2e-16	NA	NA	NA	NA	NA	NA	NA	NA	NA	NA	NA	NA	0.72	<2.2e-16	NA	NA	0.75	<2.2e-16	0.68	<2.2e-16	NA	NA
SP1	GM12878	Transcript	protein coding	NA	NA	NA	NA	0.53	<2.2e-16	0.32	<2.2e-16	NA	NA	0.36	<2.2e-16	0.58	<2.2e-16	0.34	<2.2e-16	0.51	<2.2e-16	NA	NA	0.47	<2.2e-16	0.35	<2.2e-16	NA	NA	NA	NA	NA	NA	NA	NA	NA	NA	NA	NA	0.55	<2.2e-16	NA	NA	0.48	<2.2e-16	0.55	<2.2e-16	NA	NA
SPI1-PU1	GM12878	Transcript	protein coding	NA	NA	NA	NA	0.43	<2.2e-16	0.22	<2.2e-16	NA	NA	0.39	<2.2e-16	0.54	<2.2e-16	0.28	<2.2e-16	0.39	<2.2e-16	NA	NA	0.32	<2.2e-16	0.22	<2.2e-16	NA	NA	NA	NA	NA	NA	NA	NA	NA	NA	NA	NA	0.46	<2.2e-16	NA	NA	0.32	<2.2e-16	0.29	<2.2e-16	NA	NA
SREBP1	GM12878	Transcript	protein coding	NA	NA	NA	NA	0.64	<2.2e-16	0.61	<2.2e-16	NA	NA	0.16	<2.2e-16	0.32	<2.2e-16	0.49	<2.2e-16	0.66	<2.2e-16	NA	NA	0.74	<2.2e-16	0.73	<2.2e-16	NA	NA	NA	NA	NA	NA	NA	NA	NA	NA	NA	NA	0.71	<2.2e-16	NA	NA	0.82	<2.2e-16	0.7	<2.2e-16	NA	NA
SREBP2	GM12878	Transcript	protein coding	NA	NA	NA	NA	0.61	<2.2e-16	0.59	<2.2e-16	NA	NA	0.15	<2.2e-16	0.3	<2.2e-16	0.48	<2.2e-16	0.62	<2.2e-16	NA	NA	0.68	<2.2e-16	0.71	<2.2e-16	NA	NA	NA	NA	NA	NA	NA	NA	NA	NA	NA	NA	0.68	<2.2e-16	NA	NA	0.76	<2.2e-16	0.66	<2.2e-16	NA	NA
SRF	GM12878	Transcript	protein coding	NA	NA	NA	NA	0.64	<2.2e-16	0.53	<2.2e-16	NA	NA	0.16	<2.2e-16	0.41	<2.2e-16	0.49	<2.2e-16	0.7	<2.2e-16	NA	NA	0.65	<2.2e-16	0.61	<2.2e-16	NA	NA	NA	NA	NA	NA	NA	NA	NA	NA	NA	NA	0.65	<2.2e-16	NA	NA	0.65	<2.2e-16	0.66	<2.2e-16	NA	NA
STAT1	GM12878	Transcript	protein coding	NA	NA	NA	NA	0.69	<2.2e-16	0.63	<2.2e-16	NA	NA	0.12	<2.2e-16	0.38	<2.2e-16	0.59	<2.2e-16	0.75	<2.2e-16	NA	NA	0.82	<2.2e-16	0.89	<2.2e-16	NA	NA	NA	NA	NA	NA	NA	NA	NA	NA	NA	NA	0.78	<2.2e-16	NA	NA	0.85	<2.2e-16	0.83	<2.2e-16	NA	NA
STAT3	GM12878	Transcript	protein coding	NA	NA	NA	NA	0.7	<2.2e-16	0.61	<2.2e-16	NA	NA	0.26	<2.2e-16	0.41	<2.2e-16	0.52	<2.2e-16	0.67	<2.2e-16	NA	NA	0.71	<2.2e-16	0.71	<2.2e-16	NA	NA	NA	NA	NA	NA	NA	NA	NA	NA	NA	NA	0.76	<2.2e-16	NA	NA	0.79	<2.2e-16	0.67	<2.2e-16	NA	NA
STAT5A	GM12878	Transcript	protein coding	NA	NA	NA	NA	0.86	<2.2e-16	0.53	<2.2e-16	NA	NA	0.23	<2.2e-16	0.61	<2.2e-16	0.7	<2.2e-16	0.91	<2.2e-16	NA	NA	0.75	<2.2e-16	0.69	<2.2e-16	NA	NA	NA	NA	NA	NA	NA	NA	NA	NA	NA	NA	0.83	<2.2e-16	NA	NA	0.82	<2.2e-16	0.77	<2.2e-16	NA	NA
TAF1	GM12878	Transcript	protein coding	NA	NA	NA	NA	0.68	<2.2e-16	0.49	<2.2e-16	NA	NA	0.14	<2.2e-16	0.47	<2.2e-16	0.48	<2.2e-16	0.78	<2.2e-16	NA	NA	0.63	<2.2e-16	0.6	<2.2e-16	NA	NA	NA	NA	NA	NA	NA	NA	NA	NA	NA	NA	0.69	<2.2e-16	NA	NA	0.74	<2.2e-16	0.71	<2.2e-16	NA	NA
[truncated: 1,350 more rows]
[truncated: 336 more columns]

## Sheet: Table E
Mark	Cell line	Position	Feature	Pearson's r for K562	p values for K562	Pearson's r for GM12878	p values for GM12878	Pearson's r for H1	p values for H1	Pearson's r for IMR90	p values for IMR90	Pearson's r for H9	p values for H9
[truncated: 2,322 more rows]

[truncated: 21 more sheets: Table F, Table G, Table H, Table I, Table J, Table K, Table L, Table M, Table N, Table O, Table P, Table Q, Table R, Table S, Table T, Table U, Table V, Table W, Table X, Table Y …]
